# Supplementary material for: Small-molecule targeting of MUSASHI RNA-binding activity in acute myeloid leukemia
Source: Nat Commun. 2019 Jun 19;10:2691. doi: 10.1038/s41467-019-10523-3 (PMC6584500; doi:10.1038/s41467-019-10523-3)
Supplement: Supplementary file 5 — Supplementary Data [file 41467_2019_10523_MOESM5_ESM.xlsx]

## Sheet: Supplementary Table 1 Ro-NGF
	Ro-NGF analogue series: NGF & BSA Binding
	Compound	Chemical structure	NGF binding	KD (NGF) (μM)	BSA binding
	Ro A-1		N/A	-	N/A
	Ro A-2*		No	-	No
	Ro A-3*		Yes	6.8	No
	Ro A-4*		No	-	No
	Ro A-5		Yes	2.5	No
	Ro-NGF		Yes	1.7	No
	Ro A-7		No	-	No
	Ro A-8		No	-	No
	Ro A-9		No	-	No
	RoA-10		No	-	No

## Sheet: Supplementary Table 2 AML pts
AML patient characteristics
Sample	ID#	Cells	Cell# (M)	Blast (%)	Age	Gender	Description	Collection Date
AML1	35385664	PBMC	40	57.6	Adult	M	AML, MLL1 and PTPN11	2013-04-01
AML2	35390687	BM	30.2	93.7	Adult	M	AML, IDH2 mutation, FLT3D835Y, del7q31 del 7qdel2p	2014-04-01
AML3	35290455	PBMC	42	66	Adult	F	AML, del(5q), -7,i(8)(q10), der(12)t(12;17),-17,-18, del(22q) by karyotype, del(5q), monosomy 7, deletion of ETV6 (12p13) gene by FISH. FLT3, NPM1, KIT, and CEBPA negative.	2010-10-05

## Sheet: Supplementary Table 3 MOLM13
GENE SYMBOL	baseMean	lfcSE	stat	pvalue	padj	gene	log2FoldChange
CCDC26	1239.1	0.20177	-4.42463	9.66e-06	0.00127975	CCDC26	-0.892757
WNT7B	905.544	0.118826	-6.26752	3.67e-10	2.92e-07	WNT7B	-0.744747
FGF16	189.148	0.16057	-4.57859	4.68e-06	0.000736474	FGF16	-0.735185
IRX3	5772.86	0.0896033	-7.33656	2.19e-13	4.79e-10	IRX3	-0.65738
P2RY2	444.567	0.125652	-5.186	2.15e-07	5.77e-05	P2RY2	-0.651633
IRF8	1997.3	0.104246	-6.1152	9.64e-10	6.49e-07	IRF8	-0.637482
GFI1	1129.95	0.11108	-5.62568	1.85e-08	8.08e-06	GFI1	-0.624901
IVNS1ABP	1092.6	0.120635	-5.13312	2.85e-07	7.33e-05	IVNS1ABP	-0.619233
XBP1	3199.03	0.0876233	-7.02498	2.14e-12	3.12e-09	XBP1	-0.615552
FOSL2	1383.15	0.117184	-5.23493	1.65e-07	4.89e-05	FOSL2	-0.613448
ALDH1A3	197.441	0.165667	-3.65519	0.000256996	0.0158723	ALDH1A3	-0.605545
SLC20A1	794.477	0.112745	-5.12245	3.02e-07	7.53e-05	SLC20A1	-0.577533
BCL2	2884.95	0.0963898	-5.94216	2.81e-09	1.64e-06	BCL2	-0.572764
HMX2	717.266	0.0987585	-5.63247	1.78e-08	8.08e-06	HMX2	-0.556254
HOXA11-AS	238.196	0.163179	-3.40653	0.000657955	0.0289853	HOXA11-AS	-0.555873
CDCA7	790.818	0.115498	-4.81134	1.5e-06	0.000291278	CDCA7	-0.555702
DLX5	199.516	0.149921	-3.59036	0.000330216	0.0182727	DLX5	-0.538271
SOWAHD	293.925	0.135207	-3.94823	7.87e-05	0.00673673	SOWAHD	-0.533827
CITED2	988.412	0.106581	-4.99175	5.98e-07	0.000140068	CITED2	-0.532025
TRABD	564.399	0.109127	-4.84219	1.28e-06	0.000261208	TRABD	-0.528415
CXorf21	1303.51	0.108693	-4.85454	1.21e-06	0.000257318	CXorf21	-0.527653
CTDSP1	1219.23	0.0986269	-5.34123	9.23e-08	3.36e-05	CTDSP1	-0.526789
MYB	5639.39	0.089646	-5.86693	4.44e-09	2.43e-06	MYB	-0.525947
DLX4	231.27	0.150804	-3.46332	0.000533557	0.0255653	DLX4	-0.522281
KBTBD11	729.987	0.112372	-4.58416	4.56e-06	0.000736474	KBTBD11	-0.515129
BARX1	789.461	0.100959	-5.0769	3.84e-07	9.32e-05	BARX1	-0.512561
RAB24	219.071	0.151659	-3.3768	0.000733332	0.0305577	RAB24	-0.512123
NXT1	516.8	0.139869	-3.65439	0.000257791	0.0158723	NXT1	-0.511135
PROK2	568.761	0.105796	-4.81448	1.48e-06	0.000291278	PROK2	-0.509351
P2RX7	576.142	0.127162	-3.95815	7.55e-05	0.00660383	P2RX7	-0.503328
PRR7	413.356	0.118132	-4.21792	2.47e-05	0.00276376	PRR7	-0.498273
KNSTRN	389.307	0.116145	-4.23765	2.26e-05	0.00256462	KNSTRN	-0.492183
CDKN3	458.034	0.107256	-4.57699	4.72e-06	0.000736474	CDKN3	-0.490911
ATP23	234.121	0.141727	-3.42309	0.000619142	0.0280475	ATP23	-0.485144
SNX17	657.216	0.10307	-4.6625	3.12e-06	0.000569012	SNX17	-0.480562
C4orf45	226.465	0.138323	-3.44725	0.000566315	0.0261973	C4orf45	-0.476836
C17orf62	351.781	0.120589	-3.84989	0.000118173	0.00930677	C17orf62	-0.464253
ELANE	6583.58	0.0714096	-6.48876	8.65e-11	7.57e-08	ELANE	-0.46336
SLC29A1	528.643	0.124042	-3.67038	0.000242192	0.0154561	SLC29A1	-0.455281
NTSR1	613.664	0.123444	-3.64811	0.000264179	0.0160397	NTSR1	-0.450338
RRP9	413.386	0.138712	-3.22726	0.00124984	0.0431911	RRP9	-0.447658
CAMKK2	1495.84	0.0899987	-4.96105	7.01e-07	0.000153252	CAMKK2	-0.446488
ATRAID	361.622	0.116485	-3.83004	0.000128124	0.00965681	ATRAID	-0.446143
ZNF395	1211.07	0.0860661	-5.18341	2.18e-07	5.77e-05	ZNF395	-0.446116
BMI1	1684.59	0.0829609	-5.36075	8.29e-08	3.15e-05	BMI1	-0.444732
DDIT4	4942.52	0.106178	-4.18184	2.89e-05	0.0031211	DDIT4	-0.444018
KIAA0930	4464.3	0.0836104	-5.30936	1.1e-07	3.85e-05	KIAA0930	-0.443918
ARHGEF10	493.089	0.107537	-4.12162	3.76e-05	0.00382475	ARHGEF10	-0.443227
TNFAIP8	831.219	0.12216	-3.62416	0.000289904	0.0168272	TNFAIP8	-0.442728
RAB27A	1560.48	0.0840004	-5.23176	1.68e-07	4.89e-05	RAB27A	-0.43947
ZNF639	427.4	0.120997	-3.61449	0.000300943	0.017197	ZNF639	-0.437341
PRTN3	5607.84	0.0812548	-5.30136	1.15e-07	3.87e-05	PRTN3	-0.430761
TTYH3	2229.56	0.109773	-3.91905	8.89e-05	0.00735838	TTYH3	-0.430206
HIST1H1E	1144.21	0.103629	-4.14618	3.38e-05	0.00351868	HIST1H1E	-0.429663
FAM78A	320.336	0.12869	-3.33361	0.000857257	0.0334598	FAM78A	-0.429003
BIK	385.191	0.133975	-3.20179	0.00136574	0.046103	BIK	-0.428959
CXCR4	1539.74	0.0925727	-4.61843	3.87e-06	0.000676105	CXCR4	-0.427541
MOGS	252.277	0.134778	-3.16102	0.0015722	0.0496583	MOGS	-0.426036
HMMR	623.02	0.10449	-4.06783	4.75e-05	0.00460974	HMMR	-0.425047
RCCD1	661.624	0.10692	-3.95835	7.55e-05	0.00660383	RCCD1	-0.423227
ZWINT	1371.97	0.113261	-3.71486	0.000203315	0.0133653	ZWINT	-0.420747
IL17RA	2426.18	0.106529	-3.94493	7.98e-05	0.00673673	IL17RA	-0.420249
NFATC1	738.711	0.100954	-4.12747	3.67e-05	0.00377264	NFATC1	-0.416683
DTYMK	502.396	0.128421	-3.23943	0.0011977	0.0423143	DTYMK	-0.416009
AP5B1	360.336	0.12758	-3.25125	0.00114897	0.0413393	AP5B1	-0.414794
TMEM173	1356.94	0.0891032	-4.63811	3.52e-06	0.000627366	TMEM173	-0.413271
PLXND1	1177.35	0.0901291	-4.56369	5.03e-06	0.000770936	PLXND1	-0.411321
PPP1R27	2846.31	0.0855466	-4.79982	1.59e-06	0.000301841	PPP1R27	-0.410608
RABEPK	759.027	0.112326	-3.6297	0.000283751	0.0167596	RABEPK	-0.40771
UCP2	644.448	0.101756	-3.9988	6.37e-05	0.00592159	UCP2	-0.4069
UNG	2174.15	0.101144	-4.01123	6.04e-05	0.00574018	UNG	-0.405711
CHST11	4326.07	0.0898969	-4.48261	7.37e-06	0.00100729	CHST11	-0.402973
CDC20	1098.65	0.112863	-3.5556	0.000377122	0.0199829	CDC20	-0.401296
HOMER3	2882.24	0.0847111	-4.73232	2.22e-06	0.00041291	HOMER3	-0.40088
WDR34	527.931	0.111745	-3.55925	0.000371911	0.0199486	WDR34	-0.397727
FARSA	4150.96	0.094739	-4.17397	2.99e-05	0.00315317	FARSA	-0.395437
IRS2	1416.76	0.087895	-4.49785	6.86e-06	0.000967983	IRS2	-0.395339
ACSL1	457.303	0.107975	-3.65598	0.000256205	0.0158723	ACSL1	-0.394754
CCNL2	506.338	0.107142	-3.64592	0.000266441	0.0160654	CCNL2	-0.390631
FAM72D	2058.96	0.0888147	-4.39463	1.11e-05	0.00139813	FAM72D	-0.390307
HOXA13	626.151	0.0978975	-3.97609	7.01e-05	0.00629384	HOXA13	-0.389249
SGSM3	772.057	0.11415	-3.40309	0.000666273	0.0289853	SGSM3	-0.388463
IRF2BP2	5131.51	0.0838145	-4.61033	4.02e-06	0.000689205	IRF2BP2	-0.386412
GRK2	2494.91	0.0853451	-4.5159	6.3e-06	0.000918731	GRK2	-0.38541
CERKL	408.957	0.118638	-3.24542	0.00117279	0.0416816	CERKL	-0.38503
SLC9C1	427.229	0.120764	-3.15685	0.00159486	0.0496583	SLC9C1	-0.381233
FBLN1	1096.7	0.104361	-3.61636	0.000298775	0.0171854	FBLN1	-0.377406
RASSF4	549.495	0.110406	-3.38912	0.000701161	0.0296147	RASSF4	-0.37418
PSMG2	543.785	0.106993	-3.4953	0.000473536	0.0237938	PSMG2	-0.373972
NCF4	560.676	0.10823	-3.45111	0.000558282	0.026014	NCF4	-0.373513
DDX41	604.68	0.111485	-3.33237	0.000861111	0.0334608	DDX41	-0.371509
SLC2A4RG	1055.18	0.0954426	-3.87557	0.000106375	0.00861142	SLC2A4RG	-0.369895
NEGR1	1608.39	0.0909474	-4.05859	4.94e-05	0.00474322	NEGR1	-0.369119
WT1	1110.27	0.101362	-3.64106	0.000271518	0.0162176	WT1	-0.369065
PGP	519.393	0.109256	-3.37495	0.000738291	0.0305918	PGP	-0.368734
UBASH3B	913.646	0.0951625	-3.84642	0.000119855	0.00930677	UBASH3B	-0.366035
ZBTB33	668.087	0.104789	-3.4909	0.000481393	0.0240504	ZBTB33	-0.365808
PLPPR3	8232.02	0.0794964	-4.60082	4.21e-06	0.000707555	PLPPR3	-0.365749
ACADVL	450.392	0.115557	-3.15992	0.00157814	0.0496583	ACADVL	-0.365151
DUSP23	935.646	0.101917	-3.56418	0.000364999	0.0196987	DUSP23	-0.363251
MESDC1	591.407	0.106713	-3.40093	0.000671562	0.0290667	MESDC1	-0.362925
BAHCC1	943.846	0.10695	-3.37105	0.000748821	0.0308818	BAHCC1	-0.360535
FAM45A	783.732	0.0927456	-3.88637	0.000101756	0.00831455	FAM45A	-0.360443
POP5	526.345	0.104598	-3.43416	0.000594399	0.0270668	POP5	-0.359205
UBR7	675.666	0.0961545	-3.72829	0.00019278	0.012826	UBR7	-0.358492
NAE1	2028.22	0.085649	-4.17489	2.98e-05	0.00315317	NAE1	-0.357575
LAMP5	486.716	0.109015	-3.26285	0.00110297	0.0400136	LAMP5	-0.355701
MCM7	2240.59	0.0899976	-3.944	8.01e-05	0.00673673	MCM7	-0.35495
ERLIN1	2323.45	0.0794932	-4.45851	8.25e-06	0.0011101	ERLIN1	-0.354421
LGR4	1274.17	0.0861076	-4.09882	4.15e-05	0.0041731	LGR4	-0.35294
TBC1D2B	639.227	0.0984347	-3.58304	0.000339624	0.0186751	TBC1D2B	-0.352695
RNASE2	2571.47	0.0884834	-3.97491	7.04e-05	0.00629384	RNASE2	-0.351713
BUB3	3933.08	0.0766053	-4.58853	4.46e-06	0.000736348	BUB3	-0.351506
ACTN1	2510.12	0.0776114	-4.52807	5.95e-06	0.000882096	ACTN1	-0.351429
MEF2D	2522.61	0.101842	-3.44025	0.000581171	0.026743	MEF2D	-0.350364
KIF22	575.201	0.102856	-3.40519	0.000661175	0.0289853	KIF22	-0.350246
SLC43A1	1184.16	0.10401	-3.35695	0.000788069	0.0317515	SLC43A1	-0.349156
MARVELD1	2418.5	0.0905797	-3.84124	0.000122416	0.00930677	MARVELD1	-0.347938
COL23A1	1071.28	0.0927982	-3.74335	0.000181584	0.0122122	COL23A1	-0.347376
SNRNP70	2151.38	0.0929838	-3.72717	0.000193644	0.012826	SNRNP70	-0.346566
MCM2	2895.25	0.0794292	-4.35275	1.34e-05	0.00161013	MCM2	-0.345735
COLGALT1	4364.28	0.103775	-3.32289	0.0008909	0.0340137	COLGALT1	-0.344834
ARHGAP45	1431.2	0.108636	-3.17267	0.00151044	0.049386	ARHGAP45	-0.344665
ONECUT2	1419.8	0.0821109	-4.18778	2.82e-05	0.00309793	ONECUT2	-0.343863
SIGMAR1	628.976	0.10817	-3.16296	0.00156175	0.0496583	SIGMAR1	-0.342138
GPAA1	1096.47	0.0888875	-3.84207	0.000122002	0.00930677	GPAA1	-0.341512
CDKN1B	544.784	0.107457	-3.17124	0.00151792	0.049386	CDKN1B	-0.340772
RMND5A	722.151	0.105435	-3.22296	0.00126874	0.0433304	RMND5A	-0.339812
JAG1	2209.56	0.0851267	-3.99005	6.61e-05	0.00607962	JAG1	-0.33966
HNRNPU	18324.9	0.0769548	-4.41372	1.02e-05	0.00132594	HNRNPU	-0.339657
PRPS1	641.713	0.102132	-3.32289	0.00089089	0.0340137	PRPS1	-0.339374
CNN2	1228.05	0.0884578	-3.81804	0.000134517	0.00985374	CNN2	-0.337735
ETV6	3305.86	0.0825881	-4.08663	4.38e-05	0.00429959	ETV6	-0.337507
DGKZ	2374.57	0.08791	-3.81217	0.000137752	0.00995342	DGKZ	-0.335128
SLC19A1	663.253	0.102535	-3.25619	0.00112917	0.0407948	SLC19A1	-0.333875
VIM	1989.02	0.0792329	-4.18636	2.83e-05	0.00309793	VIM	-0.331697
MRPL37	926.875	0.0910522	-3.62352	0.000290621	0.0168272	MRPL37	-0.329929
RRM2	1009.29	0.0975197	-3.37656	0.000733973	0.0305577	RRM2	-0.329281
AGAP3	849.951	0.100448	-3.26611	0.00109036	0.0397209	AGAP3	-0.328073
WDR1	1174.04	0.0948504	-3.45527	0.000549735	0.0259802	WDR1	-0.327734
CHRAC1	762.403	0.0944033	-3.46922	0.000521981	0.0253538	CHRAC1	-0.327505
GTF2A1	1042.28	0.102975	-3.177	0.00148805	0.0490945	GTF2A1	-0.327151
NOP10	1327.83	0.0935449	-3.48508	0.000491991	0.0243021	NOP10	-0.326011
SRGN	13450.3	0.072599	-4.48642	7.24e-06	0.00100515	SRGN	-0.32571
PCYOX1	3729.28	0.0718553	-4.50221	6.73e-06	0.000963892	PCYOX1	-0.323508
KIFC1	1493.32	0.0806597	-4.00151	6.29e-05	0.00591702	KIFC1	-0.322761
STRIP1	822.339	0.100953	-3.18928	0.00142629	0.0475957	STRIP1	-0.321966
DCAF16	1026.4	0.0916229	-3.51147	0.000445636	0.0230544	DCAF16	-0.321731
FPGS	1711.39	0.0976859	-3.28718	0.00101195	0.0374894	FPGS	-0.321111
POLR2I	652.493	0.0968827	-3.29193	0.000995038	0.0370196	POLR2I	-0.318931
CCNB1	1558.23	0.0825308	-3.86375	0.00011166	0.00887497	CCNB1	-0.318878
TUBB	24351.1	0.0836442	-3.80111	0.000144052	0.0102394	TUBB	-0.317941
DCAF11	915.177	0.0947653	-3.3407	0.000835668	0.0331833	DCAF11	-0.316583
CELF2	6571.47	0.0712155	-4.40924	1.04e-05	0.00133374	CELF2	-0.314006
WDR36	1051.59	0.097979	-3.19473	0.00139963	0.0470651	WDR36	-0.313016
CEBPA	8787.13	0.0717706	-4.35339	1.34e-05	0.00161013	CEBPA	-0.312446
HIST1H1B	1480.93	0.0909769	-3.40551	0.000660412	0.0289853	HIST1H1B	-0.309822
EXOSC10	774.542	0.0937461	-3.2987	0.000971327	0.0362919	EXOSC10	-0.30924
HNRNPA3	3684.53	0.0904061	-3.41007	0.000649451	0.0289853	HNRNPA3	-0.308292
AURKB	1220.79	0.0928416	-3.31763	0.000907861	0.0345106	AURKB	-0.308014
PTBP1	5654.75	0.0746533	-4.09385	4.24e-05	0.00421529	PTBP1	-0.305619
ADSS	1683.08	0.0893319	-3.41128	0.000646578	0.0289853	ADSS	-0.304736
GGA2	1446.38	0.0878094	-3.45625	0.000547743	0.0259802	GGA2	-0.303492
PHACTR3	1864.32	0.0822886	-3.67317	0.000239562	0.0154007	PHACTR3	-0.30226
SLC27A4	8458.97	0.0767206	-3.9182	8.92e-05	0.00735838	SLC27A4	-0.300607
IKZF1	3250.32	0.0816395	-3.67806	0.000235011	0.01522	IKZF1	-0.300275
CLPTM1L	3553.79	0.089675	-3.32875	0.000872372	0.0335998	CLPTM1L	-0.298506
GART	1409.04	0.0878544	-3.39417	0.000688368	0.029502	GART	-0.298193
BOP1	2940.42	0.0777733	-3.78758	0.000152119	0.0105554	BOP1	-0.294573
VPS28	1981.11	0.0869447	-3.38695	0.000706752	0.0297074	VPS28	-0.294477
LAT2	1871.93	0.0770823	-3.81894	0.000134027	0.00985374	LAT2	-0.294373
DAZAP1	5500.38	0.086436	-3.39101	0.00069635	0.0295543	DAZAP1	-0.293105
MRPL24	1136.82	0.086241	-3.39743	0.000680214	0.0292961	MRPL24	-0.292998
PYGL	5119.5	0.0866986	-3.36779	0.000757734	0.0310876	PYGL	-0.291983
RPL23A	22498.7	0.0820381	-3.50567	0.000455457	0.0231118	RPL23A	-0.287599
BLM	1403.21	0.0856953	-3.31067	0.00093073	0.0350749	BLM	-0.283709
AKAP1	1225.34	0.0843873	-3.35967	0.000780359	0.0315865	AKAP1	-0.283513
RAB8A	2207.83	0.0773544	-3.65947	0.000252734	0.0158723	RAB8A	-0.283076
RPL18A	16894.9	0.0795889	-3.55589	0.000376707	0.0199829	RPL18A	-0.283009
DZIP1	24916	0.078617	-3.59436	0.000325192	0.018155	DZIP1	-0.282578
PLEKHJ1	1298.91	0.0887354	-3.17094	0.00151948	0.049386	PLEKHJ1	-0.281374
WDR18	1684.44	0.084142	-3.33013	0.000868049	0.0335812	WDR18	-0.280204
NME4	1695.66	0.0878413	-3.15834	0.00158672	0.0496583	NME4	-0.277432
U2AF2	2919.7	0.0759689	-3.64976	0.000262488	0.0160397	U2AF2	-0.277268
RET	2861	0.0754024	-3.63997	0.000272674	0.0162176	RET	-0.274462
HMGB2	6977.17	0.0839576	-3.24861	0.00115971	0.0415548	HMGB2	-0.272745
P4HB	4028.54	0.0744564	-3.65479	0.00025739	0.0158723	P4HB	-0.272123
STOML2	1854.37	0.0801719	-3.39266	0.000692177	0.0295205	STOML2	-0.271996
AGPAT5	3438.04	0.0774421	-3.50459	0.000457318	0.0231118	AGPAT5	-0.271402
HNRNPK	13959.1	0.0709601	-3.81671	0.000135245	0.00985374	HNRNPK	-0.270834
RAB5B	2092.87	0.0848527	-3.16898	0.00152976	0.0495359	RAB5B	-0.268896
FAM107B	2344.98	0.0758946	-3.53921	0.000401319	0.0208853	FAM107B	-0.268607
SOX4	6679.1	0.0740213	-3.60625	0.000310657	0.0176368	SOX4	-0.266939
RPL29	2987.17	0.0763968	-3.46295	0.000534279	0.0255653	RPL29	-0.264559
HNRNPH1	8506.15	0.0757979	-3.47794	0.000505287	0.02468	HNRNPH1	-0.263621
UBE2C	2027.57	0.0783846	-3.33636	0.000848827	0.0334293	UBE2C	-0.261519
RNF11	3001.74	0.0726557	-3.59904	0.000319394	0.0180159	RNF11	-0.261491
CRYBG1	1829.55	0.0806447	-3.2151	0.001304	0.0443613	CRYBG1	-0.259281
MLC1	2704.18	0.0816171	-3.15778	0.00158973	0.0496583	MLC1	-0.257729
RBMX	6910.94	0.0679838	-3.76979	0.000163386	0.0112479	RBMX	-0.256284
IMPDH2	4065.03	0.0738715	-3.45058	0.000559377	0.026014	IMPDH2	-0.2549
LYST	7816.94	0.0761786	-3.33375	0.00085684	0.0334598	LYST	-0.25396
EIF3C	4984.93	0.0758056	-3.34248	0.000830343	0.0331493	EIF3C	-0.253378
PHB2	5212.38	0.0695613	-3.5937	0.000326013	0.018155	PHB2	-0.249982
MCM3	3671.91	0.0742311	-3.36663	0.000760924	0.0310876	MCM3	-0.249909
TOP2B	2490.11	0.0756162	-3.22962	0.00123955	0.0430056	TOP2B	-0.244212
FUS	9575.43	0.0720659	-3.31534	0.000915327	0.0346438	FUS	-0.238923
CENPF	7207.56	0.073853	-3.22424	0.00126309	0.0433304	CENPF	-0.238119
RPS5	13327	0.0748922	-3.17881	0.00147879	0.0490739	RPS5	-0.238068
NUDCD3	5768.86	0.0677463	-3.47962	0.000502124	0.0246633	NUDCD3	-0.235731
RACK1	35483.7	0.0700698	-3.36284	0.000771459	0.0313715	RACK1	-0.235633
STEAP1B	123242	0.067703	-3.45097	0.000558566	0.026014	STEAP1B	-0.233641
LDHA	3212.48	0.073456	-3.17467	0.00150009	0.0493058	LDHA	-0.233198
OIP5-AS1	2919.12	0.0732341	-3.15663	0.00159602	0.0496583	OIP5-AS1	-0.231173
DAPK1	11445.2	0.0686278	-3.35523	0.000792995	0.0318035	DAPK1	-0.230262
LMNB1	4883.76	0.0710736	-3.23075	0.00123465	0.0430056	LMNB1	-0.229621
RPL10	7358.44	0.069384	-3.23882	0.00120027	0.0423143	RPL10	-0.224722
SNRPD2	7001.25	0.0704153	-3.15977	0.00157892	0.0496583	SNRPD2	-0.222496
RPS2	18115.1	0.065825	-3.33967	0.000838787	0.0331833	RPS2	-0.219834
RPS11	54639.2	0.0645303	-3.17822	0.00148182	0.0490739	RPS11	-0.205092
RPL18	32249.5	0.0640317	-3.19248	0.00141056	0.0472511	RPL18	-0.20442
KIF5C	4138.75	0.0710092	3.24663	0.00116778	0.0416731	KIF5C	0.230541
DNAJB6	2945.13	0.0757445	3.23303	0.00122483	0.0430056	DNAJB6	0.244885
UBC	10065.4	0.0695343	3.78877	0.000151398	0.0105554	UBC	0.263449
EP300	1452.18	0.0872143	3.2726	0.00106562	0.0389823	EP300	0.285418
UBR3	878.706	0.0912876	3.20227	0.00136351	0.046103	UBR3	0.292327
FASTKD1	1022.04	0.0899528	3.28365	0.00102471	0.0378018	FASTKD1	0.295374
LCOR	896.266	0.0944797	3.1631	0.00156099	0.0496583	LCOR	0.298849
INTS6	1155.6	0.0873947	3.505	0.000456606	0.0231118	INTS6	0.306318
ELMO1	1473.99	0.0881151	3.4885	0.000485739	0.0241297	ELMO1	0.30739
XPO5	712.671	0.100002	3.22375	0.00126523	0.0433304	XPO5	0.322381
C20orf194	611.229	0.101252	3.23077	0.00123455	0.0430056	C20orf194	0.327124
AGO3	878.369	0.0905995	3.84421	0.000120942	0.00930677	AGO3	0.348283
NFAT5	875.082	0.0894604	3.95428	7.68e-05	0.00664513	NFAT5	0.353752
DNAJC11	439.136	0.109646	3.27267	0.00106535	0.0389823	DNAJC11	0.358835
PLA2G4A	851.462	0.0976309	3.80171	0.000143701	0.0102394	PLA2G4A	0.371164
ZNF710	531.028	0.102836	3.69263	0.000221947	0.0144812	ZNF710	0.379734
NCOA7	1272.11	0.105161	3.75541	0.000173061	0.0118209	NCOA7	0.394922
LRP12	320.328	0.125009	3.16068	0.001574	0.0496583	LRP12	0.395115
STAM	365.577	0.116481	3.50671	0.000453681	0.0231118	STAM	0.408466
IBA57	352.089	0.120785	3.40782	0.000654851	0.0289853	IBA57	0.411611
TBXAS1	691.248	0.0966077	4.38964	1.14e-05	0.00139813	TBXAS1	0.424073
CPEB4	336.799	0.119631	3.57707	0.000347463	0.0189867	CPEB4	0.42793
MALT1	412.528	0.119785	3.57336	0.000352436	0.0191388	MALT1	0.428035
SQSTM1	786.063	0.109709	3.97443	7.05e-05	0.00629384	SQSTM1	0.43603
RBBP6	2080.81	0.0903124	4.84211	1.28e-06	0.000261208	RBBP6	0.437302
RAB30-AS1	462.532	0.105813	4.24403	2.2e-05	0.00252559	RAB30-AS1	0.449073
TBK1	398.595	0.118713	3.86755	0.000109934	0.0088179	TBK1	0.45913
PMAIP1	793.881	0.106421	4.3908	1.13e-05	0.00139813	PMAIP1	0.467271
TNFAIP2	598.727	0.110193	4.246	2.18e-05	0.00252559	TNFAIP2	0.46788
REEP5	240.376	0.141794	3.30472	0.000950704	0.0356738	REEP5	0.46859
LSR	472.869	0.129834	3.628	0.000285621	0.0167596	LSR	0.471038
CNR2	279.264	0.128139	3.74851	0.000177887	0.0120563	CNR2	0.480329
GTF2IRD2	232.881	0.135747	3.54987	0.000385424	0.0202998	GTF2IRD2	0.481885
SLC4A8	220.244	0.143252	3.43845	0.000585053	0.0267807	SLC4A8	0.492566
MDM2	728.095	0.0950318	5.19317	2.07e-07	5.77e-05	MDM2	0.493516
CHD2	2133.61	0.0996054	4.97543	6.51e-07	0.00014595	CHD2	0.49558
LINC-PINT	299.99	0.13467	3.79155	0.000149708	0.0105554	LINC-PINT	0.51061
TRIM16L	258.362	0.152526	3.40306	0.000666366	0.0289853	TRIM16L	0.519056
MYO15B	272.823	0.129394	4.34437	1.4e-05	0.00165027	MYO15B	0.562137
PHLDA3	832.532	0.109625	5.24068	1.6e-07	4.89e-05	PHLDA3	0.57451
SLC48A1	179.671	0.177983	3.5427	0.000396055	0.0207348	SLC48A1	0.63054
NEAT1	1513.45	0.114885	5.53464	3.12e-08	1.3e-05	NEAT1	0.635846
CRIM1	415.082	0.11967	5.38661	7.18e-08	2.85e-05	CRIM1	0.644615
CDKN1A	2007.91	0.0990995	6.61717	3.66e-11	4.23e-08	CDKN1A	0.655759
EEPD1	384.156	0.126844	5.29359	1.2e-07	3.88e-05	EEPD1	0.671459
TEX14	293.801	0.137147	4.98841	6.09e-07	0.000140068	TEX14	0.684145
LINC00854	505.06	0.113061	6.11672	9.55e-10	6.49e-07	LINC00854	0.69156
CYP1B1	447.468	0.121206	5.77781	7.57e-09	3.89e-06	CYP1B1	0.700306
RIT1	380.839	0.125656	5.76843	8e-09	3.89e-06	RIT1	0.72484
PRDM1	192.039	0.160215	4.55649	5.2e-06	0.000784084	PRDM1	0.730017
HHAT	341.028	0.12444	6.03614	1.58e-09	9.86e-07	HHAT	0.751138
GCLM	1244.19	0.102929	7.71996	1.16e-14	3.39e-11	GCLM	0.794605
GADD45A	452.713	0.113348	7.09888	1.26e-12	2.2e-09	GADD45A	0.804644
CROCC	231.762	0.139349	6.60903	3.87e-11	4.23e-08	CROCC	0.920963
ME1	509.519	0.24593	3.81918	0.000133898	0.00985374	ME1	0.939251
SRXN1	1276.4	0.0929052	10.211	1.77e-24	1.55e-20	SRXN1	0.948657
GABARAPL1	212.762	0.151106	6.51889	7.08e-11	6.88e-08	GABARAPL1	0.98504
NQO1	591.589	0.13402	8.2677	1.37e-16	5.97e-13	NQO1	1.10803
HMOX1	1983.23	0.71457	3.46254	0.000535109	0.0255653	HMOX1	2.47423

## Sheet: Supplementary Table 4 K562
Gene symbol	baseMean	lfcSE	stat	pvalue	padj	gene	log2FoldChange
HOXC13	1.61241	1.71943	-1.99084	0.0464982	0.998953	HOXC13	-3.42311
ADGRF3	2.37553	1.57679	-2.0071	0.0447386	0.998953	ADGRF3	-3.16478
C8orf34-AS1	2.31917	1.47622	-2.08918	0.0366918	0.998953	C8orf34-AS1	-3.08408
MMP13	2.84628	1.39559	-2.20526	0.0274361	0.998953	MMP13	-3.07764
LINC01327	2.93982	1.26407	-2.31955	0.0203652	0.998953	LINC01327	-2.93208
PROK2	7.60911	1.00286	-2.74483	0.00605431	0.998953	PROK2	-2.75267
LOC101927822	2.70927	1.21158	-2.22748	0.0259154	0.998953	LOC101927822	-2.69877
SLC5A9	3.58092	1.18255	-2.20084	0.0277471	0.998953	SLC5A9	-2.60261
NDNF	2.45026	1.27595	-2.03561	0.0417892	0.998953	NDNF	-2.59734
NMB	2.17774	1.311	-1.9713	0.048689	0.998953	NMB	-2.58438
LOC100507564	2.80474	1.20856	-2.12409	0.0336628	0.998953	LOC100507564	-2.56709
ATP6V1G3	3.2806	1.14634	-2.13616	0.0326666	0.998953	ATP6V1G3	-2.44877
LOC100505817	4.16714	1.04261	-2.318	0.0204492	0.998953	LOC100505817	-2.41677
PCSK1N	5.3124	0.90376	-2.61442	0.0089379	0.998953	PCSK1N	-2.36281
PAX1	3.32228	1.07038	-1.97353	0.0484352	0.998953	PAX1	-2.11242
CRISP1	3.97362	1.00398	-2.05747	0.0396411	0.998953	CRISP1	-2.06566
SMIM10L2A	5.07206	0.858697	-2.19682	0.0280335	0.998953	SMIM10L2A	-1.8864
FAM90A1	4.57309	0.921137	-1.98976	0.0466175	0.998953	FAM90A1	-1.83284
C1orf226	13.065	0.564165	-3.17244	0.00151163	0.998953	C1orf226	-1.78978
CRIP2	17.7927	0.578799	-2.99179	0.00277347	0.998953	CRIP2	-1.73164
LILRB2	5.9576	0.788876	-2.17584	0.0295673	0.998953	LILRB2	-1.71647
C8orf87	13.8231	0.550292	-3.09831	0.00194629	0.998953	C8orf87	-1.70497
CRYBB2	14.0905	0.616437	-2.7034	0.00686338	0.998953	CRYBB2	-1.66648
MIR1247	8.32135	0.720079	-2.24246	0.0249315	0.998953	MIR1247	-1.61475
ESYT3	13.1621	0.681087	-2.34535	0.0190094	0.998953	ESYT3	-1.59739
POTED	7.06205	0.699713	-2.24675	0.0246558	0.998953	POTED	-1.57208
ERICH6B	17.116	0.492664	-3.1807	0.0014692	0.998953	ERICH6B	-1.56702
CSPG4	11.5791	0.59535	-2.59806	0.00937526	0.998953	CSPG4	-1.54675
RAB36	7.08359	0.744287	-2.05366	0.0400083	0.998953	RAB36	-1.52851
MAMSTR	15.5009	0.572528	-2.63271	0.00847077	0.998953	MAMSTR	-1.5073
QPCT	9.68195	0.659852	-2.27645	0.0228194	0.998953	QPCT	-1.50212
SHISA4	12.9891	0.567533	-2.62404	0.00868935	0.998953	SHISA4	-1.48923
TNMD	7.69309	0.665745	-2.20178	0.027681	0.998953	TNMD	-1.46582
C11orf21	17.0648	0.546464	-2.65382	0.00795852	0.998953	C11orf21	-1.45022
RIN1	9.25055	0.667382	-2.12878	0.0332721	0.998953	RIN1	-1.42071
LINC00656	9.27062	0.672899	-2.02219	0.0431565	0.998953	LINC00656	-1.36073
LINC01520	18.4617	0.552328	-2.34709	0.0189206	0.998953	LINC01520	-1.29636
NANOGNB	14.9119	0.536443	-2.31822	0.0204374	0.998953	NANOGNB	-1.24359
DKFZP434I0714	19.6342	0.488004	-2.4981	0.0124862	0.998953	DKFZP434I0714	-1.21908
ULK4P1	10.4151	0.585348	-1.9627	0.0496815	0.998953	ULK4P1	-1.14886
LAMP5	16.3936	0.492972	-2.31739	0.0204826	0.998953	LAMP5	-1.14241
FAM212A	15.7437	0.472887	-2.40322	0.0162513	0.998953	FAM212A	-1.13645
SLC6A19	39.8033	0.368116	-3.07654	0.00209418	0.998953	SLC6A19	-1.13252
COL17A1	13.7419	0.506748	-2.22	0.026419	0.998953	COL17A1	-1.12498
SMPX	52.5335	0.441723	-2.53408	0.0112743	0.998953	SMPX	-1.11936
ZC2HC1B	45.8167	0.363391	-2.97101	0.00296825	0.998953	ZC2HC1B	-1.07964
LRIG3	19.7242	0.475488	-2.24238	0.0249371	0.998953	LRIG3	-1.06622
POU2F3	32.8778	0.525869	-2.01967	0.0434179	0.998953	POU2F3	-1.06208
SEMA3F	18.7244	0.435543	-2.39164	0.0167735	0.998953	SEMA3F	-1.04166
ACSM5	24.5064	0.443599	-2.34107	0.0192286	0.998953	ACSM5	-1.0385
TECRL	18.8537	0.514115	-2.01956	0.0434291	0.998953	TECRL	-1.03829
NOG	19.8833	0.441649	-2.34723	0.0189137	0.998953	NOG	-1.03665
SLC36A2	14.2476	0.493597	-2.05758	0.0396309	0.998953	SLC36A2	-1.01561
LINC00351	15.7665	0.464679	-2.17812	0.0293973	0.998953	LINC00351	-1.01212
LINC00475	24.6621	0.392492	-2.57102	0.0101401	0.998953	LINC00475	-1.0091
LBX2-AS1	17.1442	0.484236	-2.07484	0.0380011	0.998953	LBX2-AS1	-1.00471
CABP1	23.8608	0.443419	-2.22158	0.0263116	0.998953	CABP1	-0.985091
FSD2	29.7338	0.373701	-2.63458	0.00842421	0.998953	FSD2	-0.984544
CFAP221	19.8169	0.449348	-2.17432	0.0296808	0.998953	CFAP221	-0.977029
CDCA7L	28.3561	0.414509	-2.34913	0.0188175	0.998953	CDCA7L	-0.973733
TRIM50	36.6786	0.378401	-2.55261	0.0106919	0.998953	TRIM50	-0.96591
C9orf135	44.939	0.369564	-2.58481	0.00974339	0.998953	C9orf135	-0.955252
GBP7	18.1164	0.477243	-1.99772	0.045747	0.998953	GBP7	-0.953399
SPINT1	21.3457	0.44368	-2.14466	0.0319803	0.998953	SPINT1	-0.951541
FAM153B	18.3913	0.438487	-2.16839	0.0301289	0.998953	FAM153B	-0.950812
EPHA10	16.4263	0.478466	-1.98518	0.0471244	0.998953	EPHA10	-0.949842
MT2A	4027.81	0.350688	-2.6679	0.00763276	0.998953	MT2A	-0.9356
CLUL1	20.1791	0.418851	-2.22444	0.0261186	0.998953	CLUL1	-0.931711
CDH6	24.2907	0.407908	-2.27069	0.0231658	0.998953	CDH6	-0.926232
LINC00964	320.834	0.411505	-2.23768	0.0252422	0.998953	LINC00964	-0.920815
EYA1	68.2376	0.440138	-2.06793	0.0386464	0.998953	EYA1	-0.910176
TFEB	22.8152	0.404524	-2.24588	0.0247115	0.998953	TFEB	-0.908512
UPK2	39.0672	0.338032	-2.65008	0.0080473	0.998953	UPK2	-0.895811
PRSS2	28.9926	0.439629	-2.03003	0.0423531	0.998953	PRSS2	-0.892462
IZUMO4	34.3614	0.373534	-2.38178	0.0172292	0.998953	IZUMO4	-0.889676
TRIM67	21.4901	0.440547	-1.99112	0.0464673	0.998953	TRIM67	-0.877184
TTTY11	39.8053	0.41262	-2.09781	0.0359223	0.998953	TTTY11	-0.865597
APOH	25.0195	0.394217	-2.19241	0.0283502	0.998953	APOH	-0.864284
SAG	41.4711	0.412789	-2.05779	0.03961	0.998953	SAG	-0.849435
RGR	32.4565	0.364357	-2.29608	0.0216714	0.998953	RGR	-0.836592
CATSPER1	46.5057	0.32179	-2.55879	0.0105038	0.998953	CATSPER1	-0.823392
CCDC175	27.4271	0.388647	-2.09437	0.0362269	0.998953	CCDC175	-0.813971
LINC00707	36.0831	0.404821	-1.97619	0.0481336	0.998953	LINC00707	-0.800001
LOC105372440	28.5032	0.376931	-2.07199	0.0382666	0.998953	LOC105372440	-0.780996
TXNRD3NB	35.2792	0.346252	-2.2525	0.0242908	0.998953	TXNRD3NB	-0.779932
MPRIP	1860.22	0.362303	-2.12013	0.0339951	0.998953	MPRIP	-0.768129
LOC101927575	28.4753	0.371555	-2.05231	0.0401399	0.998953	LOC101927575	-0.762545
CAPN12	225.864	0.348537	-2.16701	0.0302344	0.998953	CAPN12	-0.755282
LRRK2	54.0292	0.321563	-2.33146	0.0197292	0.998953	LRRK2	-0.749711
REEP1	55.5167	0.304138	-2.42993	0.0151019	0.998953	REEP1	-0.739033
RASGRF1	84.9874	0.335022	-2.18778	0.0286858	0.998953	RASGRF1	-0.732953
AMZ1	96.847	0.364916	-1.99194	0.0463779	0.998953	AMZ1	-0.72689
ADAM23	75.994	0.341396	-2.08192	0.0373495	0.998953	ADAM23	-0.710761
TRABD2B	48.1328	0.349174	-2.02993	0.0423637	0.998953	TRABD2B	-0.708799
ZNF140	158.518	0.319697	-2.2068	0.0273283	0.998953	ZNF140	-0.705505
RAMP1	102.652	0.317877	-2.20924	0.0271583	0.998953	RAMP1	-0.702266
TNS3	478.308	0.320044	-2.17916	0.0293201	0.998953	TNS3	-0.697427
GLT1D1	103.145	0.283815	-2.4511	0.0142422	0.998953	GLT1D1	-0.695659
DYSF	97.821	0.296172	-2.31973	0.0203555	0.998953	DYSF	-0.687039
SH3BP4	33.1335	0.338753	-2.00283	0.0451954	0.998953	SH3BP4	-0.678464
LINC02015	102.305	0.335499	-2.00929	0.0445061	0.998953	LINC02015	-0.674117
CYP27A1	54.0287	0.328932	-2.04364	0.0409887	0.998953	CYP27A1	-0.672221
ZNF385B	80.4719	0.283749	-2.36785	0.0178919	0.998953	ZNF385B	-0.671875
ST5	176.659	0.327927	-2.03889	0.0414612	0.998953	ST5	-0.668606
RCBTB1	233.291	0.314091	-2.12616	0.03349	0.998953	RCBTB1	-0.667808
PIEZO2	198.425	0.302319	-2.18297	0.0290381	0.998953	PIEZO2	-0.659952
NAV3	50.1315	0.326035	-2.01674	0.0437222	0.998953	NAV3	-0.65753
LOC101929380	41.9778	0.332176	-1.97083	0.0487434	0.998953	LOC101929380	-0.654662
GABRE	206.72	0.235997	-2.75427	0.00588241	0.998953	GABRE	-0.649998
EPHA6	82.9369	0.265922	-2.43749	0.0147898	0.998953	EPHA6	-0.64818
LOC101928436	111.064	0.271681	-2.3773	0.0174397	0.998953	LOC101928436	-0.645869
RASGRF2	56.8958	0.294158	-2.18598	0.028817	0.998953	RASGRF2	-0.643025
TVP23A	485.567	0.30742	-2.06266	0.0391451	0.998953	TVP23A	-0.634103
ADAMTS19	403.475	0.317508	-1.97593	0.0481629	0.998953	ADAMTS19	-0.627373
POLD1	116.736	0.293759	-2.12529	0.033562	0.998953	POLD1	-0.624325
ABHD15	111.991	0.255043	-2.43696	0.0148113	0.998953	ABHD15	-0.62153
SLC27A6	104.424	0.267672	-2.31848	0.0204234	0.998953	SLC27A6	-0.620592
ZNF804A	71.3169	0.291634	-2.1225	0.0337955	0.998953	ZNF804A	-0.618994
ANO3	108.539	0.282976	-2.1806	0.029213	0.998953	ANO3	-0.617057
ANO2	122.274	0.282659	-2.18251	0.0290722	0.998953	ANO2	-0.616906
KIT	145.651	0.249454	-2.43338	0.0149587	0.998953	KIT	-0.607015
TSKU	175.851	0.22526	-2.67802	0.00740594	0.998953	TSKU	-0.60325
TRIM26	377.043	0.272587	-2.17035	0.0299801	0.998953	TRIM26	-0.591611
CRLF2	56.5553	0.294362	-2.00676	0.0447751	0.998953	CRLF2	-0.590714
MMP26	367.098	0.262844	-2.18492	0.0288944	0.998953	MMP26	-0.574293
RUNX2	199.728	0.285299	-2.01074	0.0443533	0.998953	RUNX2	-0.573661
MYB	2083.12	0.176406	-3.24832	0.0011609	0.998953	MYB	-0.573022
COL4A5	58.9812	0.278403	-2.05115	0.0402526	0.998953	COL4A5	-0.571046
NLRP12	59.1213	0.276231	-2.05515	0.0398642	0.998953	NLRP12	-0.567697
CCM2	562.203	0.268878	-2.09804	0.0359018	0.998953	CCM2	-0.564115
ADAM12	143.491	0.254223	-2.2172	0.0266092	0.998953	ADAM12	-0.563664
PLK3	98.0295	0.237373	-2.32178	0.0202447	0.998953	PLK3	-0.551128
BCL2	76.6616	0.275345	-1.97149	0.0486674	0.998953	BCL2	-0.542841
LINC02198	60.6061	0.274902	-1.97427	0.0483515	0.998953	LINC02198	-0.54273
P2RX1	151.945	0.258381	-2.08961	0.0366525	0.998953	P2RX1	-0.539916
UBXN10	88.8418	0.242855	-2.21701	0.0266224	0.998953	UBXN10	-0.538412
CD36	93.1555	0.256691	-2.06863	0.038581	0.998953	CD36	-0.530999
NFE2	1061.59	0.188132	-2.80775	0.00498885	0.998953	NFE2	-0.528229
PAQR8	267.284	0.26268	-1.99753	0.0457675	0.998953	PAQR8	-0.524711
MMP15	134.659	0.230601	-2.26245	0.0236695	0.998953	MMP15	-0.521724
MAGI1	1847.86	0.256143	-2.0299	0.042367	0.998953	MAGI1	-0.519943
BANK1	80.5441	0.242802	-2.13873	0.0324575	0.998953	BANK1	-0.519288
TBXA2R	94.4551	0.236333	-2.1793	0.0293092	0.998953	TBXA2R	-0.515042
MYC	430.132	0.185346	-2.76131	0.00575706	0.998953	MYC	-0.511798
FAM129B	333.996	0.213143	-2.37064	0.0177576	0.998953	FAM129B	-0.505283
ID1	1883.36	0.221607	-2.24064	0.0250496	0.998953	ID1	-0.496541
IFT22	110.728	0.224812	-2.1973	0.0279992	0.998953	IFT22	-0.493979
MAP3K5	694.007	0.229833	-2.13414	0.0328314	0.998953	MAP3K5	-0.490495
CD81-AS1	97.1546	0.249141	-1.96652	0.0492383	0.998953	CD81-AS1	-0.489941
IL10RA	86.4663	0.246111	-1.98105	0.0475851	0.998953	IL10RA	-0.487559
CCR10	114.387	0.223362	-2.18003	0.029255	0.998953	CCR10	-0.486937
CNN1	162.845	0.234552	-2.05308	0.0400647	0.998953	CNN1	-0.481555
SALL2	231.609	0.225542	-2.10655	0.0351567	0.998953	SALL2	-0.475116
ZFPM1	469.516	0.215242	-2.12185	0.0338504	0.998953	ZFPM1	-0.456711
CCDC8	282.062	0.200574	-2.09432	0.0362318	0.998953	CCDC8	-0.420066
GFI1B	469.873	0.187167	-2.17892	0.0293375	0.998953	GFI1B	-0.407822
SH2B3	327.371	0.196831	-2.01658	0.0437396	0.998953	SH2B3	-0.396925
PI4K2B	315.793	0.198099	-1.98799	0.0468129	0.998953	PI4K2B	-0.393819
RCSD1	1132.23	0.151267	-2.55306	0.0106781	0.998953	RCSD1	-0.386195
KLF1	1897.98	0.171901	-2.19199	0.0283801	0.998953	KLF1	-0.376806
KRT19	1666.99	0.161965	-2.30651	0.0210823	0.998953	KRT19	-0.373573
BCL2L1	1349.14	0.172227	-2.12709	0.0334127	0.998953	BCL2L1	-0.366342
LYL1	1231.67	0.178454	-2.00901	0.0445361	0.998953	LYL1	-0.358516
MAD1L1	499.456	0.169821	-1.99164	0.0464111	0.998953	MAD1L1	-0.338222
BRD2	3355.82	0.143631	2.23287	0.0255574	0.998953	BRD2	0.320711
INSIG1	3476.33	0.145731	2.20897	0.0271767	0.998953	INSIG1	0.321916
HMGB2	6606.99	0.153738	2.14235	0.032165	0.998953	HMGB2	0.329361
MSMO1	960.388	0.158721	2.13757	0.0325513	0.998953	MSMO1	0.339278
TAF1	1946.78	0.172169	2.01492	0.0439128	0.998953	TAF1	0.346908
MRPS36	1179.32	0.165107	2.10636	0.0351734	0.998953	MRPS36	0.347774
PEX14	2043.83	0.177105	1.96713	0.0491685	0.998953	PEX14	0.348388
NQO1	1021.92	0.168349	2.10134	0.0356115	0.998953	NQO1	0.353757
TXN	3279.13	0.178453	1.98385	0.0472725	0.998953	TXN	0.354025
DNAJB6	3571.02	0.162895	2.17761	0.0294352	0.998953	DNAJB6	0.354721
IRF2BP2	621.914	0.172464	2.11824	0.0341547	0.998953	IRF2BP2	0.36532
KLF6	937.009	0.166902	2.2066	0.0273421	0.998953	KLF6	0.368285
NUFIP2	1830.44	0.178148	2.07925	0.0375947	0.998953	NUFIP2	0.370414
GMEB1	596.888	0.188083	1.98101	0.0475903	0.998953	GMEB1	0.372595
ZNF701	396.626	0.177647	2.11135	0.0347422	0.998953	ZNF701	0.375076
CERS2	1756.25	0.186712	2.05057	0.0403087	0.998953	CERS2	0.382866
ETNK1	946.015	0.179846	2.13179	0.0330245	0.998953	ETNK1	0.383392
ANKRD40	409.056	0.183493	2.14025	0.0323347	0.998953	ANKRD40	0.39272
RNF146	295.826	0.184806	2.13898	0.0324373	0.998953	RNF146	0.395297
MRPL13	1340.54	0.186728	2.13349	0.0328843	0.998953	MRPL13	0.398382
ALAS1	189.448	0.202277	1.97512	0.0482544	0.998953	ALAS1	0.399521
STIL	1502.84	0.157514	2.53703	0.0111798	0.998953	STIL	0.399618
HMGXB4	792.529	0.200403	2.00587	0.0448702	0.998953	HMGXB4	0.401981
ZFAND5	510.026	0.19718	2.04337	0.0410157	0.998953	ZFAND5	0.402912
THOC3	765.335	0.174749	2.31145	0.0208081	0.998953	THOC3	0.403924
ZNF746	368.117	0.183199	2.22285	0.0262257	0.998953	ZNF746	0.407224
HJURP	723.273	0.174142	2.38783	0.0169481	0.998953	HJURP	0.415822
FAM102A	213.377	0.202856	2.06434	0.0389853	0.998953	FAM102A	0.418764
LOC389831	312.986	0.189212	2.22704	0.0259444	0.998953	LOC389831	0.421383
SLC35D1	312.978	0.188518	2.26473	0.0235295	0.998953	SLC35D1	0.42694
FBXO38	265.077	0.210158	2.03362	0.0419903	0.998953	FBXO38	0.42738
RWDD3	248.846	0.204668	2.09645	0.0360426	0.998953	RWDD3	0.429076
STARD9	930.12	0.207995	2.0739	0.0380887	0.998953	STARD9	0.431361
BMT2	216.03	0.211625	2.04288	0.0410639	0.998953	BMT2	0.432324
LOC101927237	358.098	0.211728	2.05228	0.0401421	0.998953	LOC101927237	0.434527
TRPM7	1323.41	0.195622	2.23163	0.0256391	0.998953	TRPM7	0.436556
EIF1AD	508.436	0.187966	2.36634	0.0179649	0.998953	EIF1AD	0.444792
SFRP1	1008.39	0.225103	1.98116	0.0475738	0.998953	SFRP1	0.445964
HEXIM1	1281.62	0.171507	2.60424	0.00920779	0.998953	HEXIM1	0.446645
ZNF92	205.698	0.20184	2.2191	0.0264798	0.998953	ZNF92	0.447902
RAP2A	158.153	0.206709	2.17006	0.0300022	0.998953	RAP2A	0.448571
PIAS4	569.046	0.18262	2.48434	0.0129791	0.998953	PIAS4	0.453691
KBTBD2	532.895	0.195677	2.32881	0.0198691	0.998953	KBTBD2	0.455695
ATAD1	867.436	0.209351	2.19092	0.0284574	0.998953	ATAD1	0.458671
GREM1	601.578	0.228795	2.03063	0.0422925	0.998953	GREM1	0.464599
KAT6B	482.15	0.204171	2.28081	0.0225598	0.998953	KAT6B	0.465675
DNAH2	425.528	0.205632	2.27151	0.0231162	0.998953	DNAH2	0.467094
KIAA0907	750.628	0.208619	2.25139	0.0243606	0.998953	KIAA0907	0.469683
LINC01581	189.437	0.197967	2.37759	0.017426	0.998953	LINC01581	0.470685
CXCL14	818.557	0.240662	1.98837	0.0467703	0.998953	CXCL14	0.478526
NUP153	1476.7	0.209011	2.30579	0.0211223	0.998953	NUP153	0.481936
PPP1R15B	573.536	0.190853	2.5278	0.0114781	0.998953	PPP1R15B	0.482437
GPM6B	687.695	0.233063	2.08282	0.0372676	0.998953	GPM6B	0.485428
EPC1	1066.22	0.246826	1.97333	0.0484581	0.998953	EPC1	0.487069
ME1	573.25	0.183109	2.66876	0.00761307	0.998953	ME1	0.488674
ZNF680	139.996	0.211936	2.3287	0.0198747	0.998953	ZNF680	0.493537
LINC01019	1231.36	0.22344	2.23531	0.0253971	0.998953	LINC01019	0.499457
MLLT3	2515.17	0.236053	2.12526	0.033565	0.998953	MLLT3	0.501675
FKTN	136.071	0.219656	2.29286	0.0218559	0.998953	FKTN	0.503642
ISCU	913.073	0.238981	2.11491	0.0344375	0.998953	ISCU	0.505424
NFIL3	109.858	0.259115	1.97692	0.0480506	0.998953	NFIL3	0.51225
LRP12	373.172	0.198224	2.59121	0.00956398	0.998953	LRP12	0.51364
ZPBP	553.794	0.232352	2.21628	0.0266723	0.998953	ZPBP	0.514957
KLHL15	182.017	0.218933	2.36204	0.0181747	0.998953	KLHL15	0.517128
FHIT	8881.57	0.225336	2.30074	0.0214064	0.998953	FHIT	0.51844
MAP3K8	337.164	0.218991	2.38285	0.0171793	0.998953	MAP3K8	0.521823
HSPA1B	2663.53	0.205568	2.54056	0.0110676	0.998953	HSPA1B	0.522257
GADD45A	1593.89	0.260675	2.01855	0.0435339	0.998953	GADD45A	0.526185
FBXO8	84.4647	0.260048	2.0329	0.0420631	0.998953	FBXO8	0.52865
ABCB5	565.472	0.252571	2.0971	0.0359846	0.998953	ABCB5	0.529666
GCM1	917.925	0.252731	2.10351	0.0354215	0.998953	GCM1	0.531621
SPATA3-AS1	381.342	0.240512	2.21291	0.0269037	0.998953	SPATA3-AS1	0.532232
DCLRE1A	121.678	0.25328	2.10411	0.035369	0.998953	DCLRE1A	0.532928
2017-03-03	1738.44	0.220233	2.42257	0.0154112	0.998953	42797	0.53353
CCNT2	340.241	0.261757	2.05015	0.0403496	0.998953	CCNT2	0.536643
NDUFB3	780.382	0.190044	2.91794	0.00352355	0.998953	NDUFB3	0.554538
UBQLN2	176.296	0.244554	2.31228	0.0207624	0.998953	UBQLN2	0.565477
MRPL39	389.929	0.238742	2.37044	0.0177669	0.998953	MRPL39	0.565924
MOSPD2	130.764	0.282106	2.00712	0.0447374	0.998953	MOSPD2	0.566219
BAG3	481.582	0.186606	3.04502	0.00232667	0.998953	BAG3	0.568218
BSDC1	881.446	0.214216	2.6568	0.0078887	0.998953	BSDC1	0.569128
GPRIN1	73.669	0.284638	1.99998	0.0455023	0.998953	GPRIN1	0.569271
ATF3	93.148	0.268858	2.127	0.0334197	0.998953	ATF3	0.571862
POT1-AS1	2165.27	0.218359	2.65372	0.00796087	0.998953	POT1-AS1	0.579463
PMAIP1	281.612	0.241627	2.40594	0.0161308	0.998953	PMAIP1	0.581341
CROCC	471.189	0.207928	2.87729	0.00401108	0.998953	CROCC	0.598268
VGLL3	636.95	0.264848	2.30866	0.0209626	0.998953	VGLL3	0.611442
SBDS	1241.86	0.290051	2.13922	0.0324181	0.998953	SBDS	0.620482
SREK1	1680.14	0.265339	2.33977	0.0192959	0.998953	SREK1	0.620831
FGF16	197.533	0.261515	2.48521	0.0129476	0.998953	FGF16	0.649919
SPAG11B	3149.59	0.298614	2.23178	0.0256296	0.998953	SPAG11B	0.66644
JUN	994.743	0.164554	4.10491	4.04e-05	0.198523	JUN	0.67548
NKX2-5	1963.81	0.252055	2.74188	0.00610883	0.998953	NKX2-5	0.691104
GALNT13	808.007	0.273847	2.54988	0.0107759	0.998953	GALNT13	0.698277
FABP3	46.3567	0.316404	2.2631	0.0236292	0.998953	FABP3	0.716055
CRTC2	48.2681	0.313759	2.33011	0.0198006	0.998953	CRTC2	0.731092
GCLM	2557.54	0.162686	4.65147	3.3e-06	0.0323524	GCLM	0.756731
MIR22HG	52.5493	0.385343	2.04338	0.0410147	0.998953	MIR22HG	0.787402
SRXN1	1824.61	0.19393	4.33837	1.44e-05	0.0939392	SRXN1	0.841342
SLC7A11	129.912	0.30378	2.92223	0.00347531	0.998953	SLC7A11	0.887716
MAFG	1495.82	0.26959	3.4082	0.000653933	0.998953	MAFG	0.918817
RANBP3L	17.9638	0.46189	2.05425	0.0399513	0.998953	RANBP3L	0.948838
CXCL3	60.4982	0.428677	2.44977	0.0142947	0.998953	CXCL3	1.05016
SMN2	498.045	0.338613	3.18316	0.00145677	0.998953	SMN2	1.07786
HTRA3	23.0778	0.503103	2.28363	0.0223931	0.998953	HTRA3	1.1489
C9orf24	12.688	0.592156	1.98559	0.0470794	0.998953	C9orf24	1.17578
TMED1	18.3135	0.524483	2.37712	0.0174483	0.998953	TMED1	1.24676
UPK3A	10.6883	0.612843	2.23295	0.0255525	0.998953	UPK3A	1.36845
OSGIN1	169.799	0.345177	5.02353	5.07e-07	0.0099601	OSGIN1	1.73401
ANKRD20A3	6.2941	0.851786	2.05672	0.0397131	0.998953	ANKRD20A3	1.75189
LINC02080	2.94698	1.13941	2.03443	0.0419079	0.998953	LINC02080	2.31806

## Sheet: Supplementary Table 5 Rank 
Supplementary Table 5
Rank list from Kharas et al 2010 Nature Med shRNAs in AML and CML-BC cell lines		K562 Ro treated at 4hrs		MOLM13 Ro treated at 4hrs
Gene Symbol	Log2 Fold Change	Gene Symbol	Log2 Fold Change	Gene Symbol	Log2 Fold Change
MALAT1	1.64	LINC00612	2.76014	LINC01053	3.59423
AK026418	1.4	NHLH1	2.47808	SLC22A13	3.32073
GNPTAB	1.38	LINC01450	2.4348	NKAPL	3.302
THC2650264	1.37	TRAT1	2.41091	DEFB124	3.25416
THC2640472	1.35	RFPL1	2.37446	MIR4482	3.15777
AB040974	1.35	PART1	2.36645	TBX10	3.00362
SFRS12	1.35	LINC00494	2.32473	HID1-AS1	2.98758
CDK6	1.34	LINC02080	2.31806	TNFRSF17	2.98247
CR622342	1.33	TMEM74	2.27725	SYS1	2.96105
CCDC144A	1.33	LINC00229	2.27538	LINC01674	2.93615
CCDC90B	1.32	KLF4	2.24385	FAM26D	2.89187
TncRNA	1.29	C20orf173	2.24157	ZNF705E	2.88899
CROP	1.28	PAX8-AS1	2.24132	LOC654841	2.88052
BC017507	1.22	RNVU1-6	2.14527	SLITRK3	2.85519
BC030757	1.21	PCDHA1	2.11008	AREG	2.84129
KIT	1.21	CNTD2	2.07513	VTRNA1-3	2.80653
RICTOR	1.2	LRRN4CL	2.03225	BCL2L10	2.75183
CCDC144B	1.19	MYH6	2.02708	HOXD-AS2	2.72974
BC043173	1.17	RAB40AL	2.01674	PITX3	2.7269
DCBLD2	1.17	RPL10L	2.00652	ITIH3	2.69263
THC2507925	1.16	PERP	1.99444	LOC388242	2.69263
LCORL	1.16	WFDC9	1.98128	CRYBA1	2.58401
CCT6AP1	1.16	LINC01087	1.98093	SERPINA12	2.58276
THC2696916	1.16	TRAPPC1	1.97555	LOC100288966	2.58243
HBS1L	1.14	LOC100996583	1.97004	LINC01995	2.57848
ARPC3	1.14	PCAT7	1.93045	FNDC11	2.57848
C10orf46	1.13	DKK4	1.93045	LINC01506	2.57422
ADAM9	1.13	EBLN1	1.92195	APOBEC3F	2.55644
GOLGA8A	1.13	CNTN4-AS1	1.92079	RNVU1-6	2.5526
AF100640	1.12	LINC01474	1.91736	RFPL1	2.53746
NUCB2	1.11	GOT1L1	1.9015	TOMM34	2.53488
PDCD6IP	1.11	LRRC25	1.85267	FCAMR	2.52923
CYB5A	1.11	FMOD	1.84889	ARHGEF5	2.52356
THC2539273	1.1	HABP2	1.84209	LOC100507642	2.5145
ABCA1	1.09	FAM109B	1.82454	FGFR1OP	2.50289
LRRC8B	1.09	SLC35G5	1.81977	LINC00492	2.489
THAP1	1.09	LINC01913	1.81155	CLCNKB	2.48062
COX7C	1.08	LINC02076	1.80336	HMOX1	2.47423
AK022443	1.08	LRCOL1	1.80277	EPPK1	2.46709
AK098835	1.08	MIR1268A	1.79565	LINC00838	2.45831
BE970058	1.08	ASB12	1.78759	GAGE1	2.4396
THC2672257	1.07	CELF3	1.78605	TAS1R2	2.39185
FLJ11292	1.06	BAALC-AS1	1.77518	GADD45G	2.38999
DKFZp667E0512	1.06	ANKRD20A3	1.75189	LINC02150	2.34007
AK091744	1.06	PRAMEF15	1.73752	CTAG2	2.33795
ENST00000342314	1.05	CARMIL2	1.73698	LOC100506123	2.33437
HIST1H1C	1.04	OSGIN1	1.73401	LOC102724434	2.33377
ZCCHC14	1.03	LOC105372419	1.72496	DPCR1	2.33021
CENPF	1.03	CEND1	1.71994	GOLGA7B	2.32894
LOC643475	1.03	LOC100133077	1.71648	CD200	2.31708
NPEPPS	1.03	FOXD1	1.71368	MIR4290HG	2.30565
AK024092	1.02	PLA2G3	1.71309	SLC22A31	2.28895
BZRAP1	1.02	C17orf100	1.71227	CTD-2194D22.4	2.28205
A_24_P630916	1.02	FRG2	1.71183	FAM131C	2.28205
MNS1	1.02	LINC01136	1.70847	PRR35	2.27718
GPSM2	1.01	PLA2G1B	1.70671	LEFTY2	2.2407
THC2641587	1	LOC101927450	1.69171	HCRT	2.20371
ANLN	1	KRT40	1.69171	FCRL5	2.19598
TXNIP	0.99	SYP-AS1	1.68712	AMTN	2.15228
KCNQ1OT1	0.99	CDCP2	1.68712	FCN1	2.14221
AK074562	0.99	SGCA	1.68336	CACTIN-AS1	2.12601
RABEP1	0.99	CNN3	1.67404	ARC	2.11259
DYRK2	0.99	LINC02169	1.66819	SNTN	2.10242
KIAA0280	0.99	CARD18	1.66704	CLDN1	2.09097
MIRHG1	0.99	LURAP1	1.66532	LINC01558	2.09028
FAM120A	0.99	PODN	1.66081	WNT4	2.08835
RWDD4A	0.99	OR8G5	1.65946	ADPRM	2.087
ASPH	0.99	LINC02224	1.65317	OSGIN1	2.08492
GOLGA8E	0.98	ROPN1	1.64352	FAM170B-AS1	2.08412
AQR	0.98	DPEP2	1.6432	TCHH	2.07023
OCRL	0.98	LOC145694	1.6368	MAGEB17	2.06611
FCHO2	0.98	LOC339593	1.63351	PEX19	2.06197
BCLAF1	0.97	STARD5	1.63346	GHSR	2.05888
THC2525955	0.97	LINC00167	1.61566	LINC02224	2.04061
ZNF207	0.97	EFCAB11	1.61262	LOC102724301	2.04061
AK001118	0.97	TTR	1.60658	SMG1P3	2.03539
AK022086	0.96	TESK1	1.59804	LINC00851	2.03496
BG571904	0.96	DKFZP434K028	1.59542	EVADR	2.02258
CROT	0.96	ASB10	1.59099	LINC01635	2.01294
CFL2	0.96	KIAA0087	1.58851	TCP11X2	2.01169
EPM2AIP1	0.96	ZC3HAV1L	1.58721	PRR30	2.01169
CCDC150	0.96	SH3BP1	1.56085	CECR3	2.0113
FAM33A	0.95	OSR1	1.55152	GZMA	2.0052
LOC441131	0.94	BPIFB1	1.54902	LINC02181	2.00349
MLL	0.94	LINC01653	1.53752	LOC399886	2.00269
SGK3	0.94	SLC46A2	1.52381	GRASP	2.00141
MAPK6	0.94	PHLDA3	1.5234	FLJ31104	1.9849
AK024898	0.94	ARIH2OS	1.51921	LOC101928201	1.98462
MT2A	0.94	LINC01346	1.51763	MCIDAS	1.98215
TRA2A	0.93	LINC01718	1.50943	HPCA	1.98193
ENST00000395606	0.93	RDH10	1.50482	H19	1.97959
U25029	0.93	MOGAT2	1.49649	LINC01721	1.97769
AK098491	0.93	AKR1B15	1.49554	FAM71E2	1.95876
THC2657163	0.93	LINC01001	1.48482	FOXD4L3	1.9562
AF037219	0.93	LINC00593	1.47434	TBC1D29	1.94474
CD558603	0.93	LHX5	1.46813	AMER3	1.92164
AF087999	0.92	LINC02127	1.45717	C1orf115	1.91399
NKTR	0.92	LINC02120	1.45393	H1FOO	1.91096
BI013473	0.92	EQTN	1.45108	ZSWIM2	1.90513
AUH	0.92	TNFSF4	1.44407	PRCD	1.90124
A_24_P914102	0.92	FBXO43	1.43834	LOC101927322	1.90061
MGEA5	0.92	LOC729296	1.43628	KY	1.90061
A_23_P115902	0.92	VAMP1	1.43551	LINC01030	1.89884
C9orf86	0.92	SLC22A31	1.43062	T	1.89447
ENST00000245185	0.92	KLHL33	1.42803	MIR320A	1.89154
AK024956	0.92	DEFB125	1.42657	SRMS	1.8891
THC2781073	0.91	MIR148A	1.41887	LOC101929445	1.88811
LOC391160	0.91	CLN5	1.4151	C8orf49	1.88811
AK056744	0.91	EVPLL	1.40755	C1orf105	1.88661
C1orf218	0.91	ANKRD34B	1.40149	CXCR5	1.88578
HIST1H2AC	0.9	LINC01879	1.40149	YPEL3	1.8846
DCUN1D4	0.9	LOC101927359	1.401	SPATA4	1.88148
AK023574	0.9	RTP4	1.39542	ZNF580	1.87378
ARID2	0.9	LOC440896	1.3943	COX7A1	1.86855
ANKRD36B	0.9	FAM201A	1.39245	TSSK6	1.86773
NTS	0.9	KRT28	1.3915	PMF1-BGLAP	1.86748
SDCCAG1	0.9	NUDT17	1.39048	MAS1	1.85893
BC029907	0.9	FAIM2	1.39036	DKK4	1.85791
CCDC112	0.9	NXF5	1.38469	PCSK9	1.85257
SLC40A1	0.89	MIR3142HG	1.38397	RAB40AL	1.84944
LOC727820	0.89	EI24	1.37795	ACTRT3	1.83904
AK075052	0.89	UPK3A	1.36845	LINC01118	1.83403
XR_018202	0.89	ADAM20P1	1.36337	LOC101928414	1.8326
THC2701422	0.89	LINC01104	1.36294	CCDC140	1.8326
A_32_P179807	0.89	F3	1.36218	ASCL1	1.8326
A_32_P385	0.88	TMPRSS11B	1.36134	CCL18	1.8326
PTAR1	0.88	C17orf105	1.35626	COX6B2	1.8259
KPNA5	0.88	MIR503HG	1.3453	SERPINA5	1.8259
AK308671	0.88	DEFB104B	1.34242	CDCP2	1.81733
THC2648967	0.88	ZNF439	1.32678	TCEAL3	1.81652
BX116720	0.88	RFPL2	1.32432	LINC01629	1.81527
BQ069859	0.88	NR4A3	1.324	WFDC9	1.79685
THC2697442	0.87	LINC02108	1.32314	SVIP	1.78894
THC2717828	0.87	NEFM	1.32314	OR1F1	1.78263
BQ926066	0.87	CYP4F2	1.31009	PTPRN	1.77706
CEP290	0.87	GIMAP4	1.30876	TEX37	1.76993
MTMR9	0.87	LINC00944	1.29643	LOC285804	1.76433
CDKN3	0.87	LOC100128398	1.29353	PROX2	1.75646
BC016022	0.87	TMEM50B	1.29308	EPGN	1.74809
AHI1	0.87	LOC283038	1.28958	SLN	1.748
SCLT1	0.87	FAM225B	1.28467	HCG25	1.74652
TBRG1	0.87	ULBP2	1.27981	ADIG	1.74624
THC2616783	0.87	FAM92B	1.27792	C8orf88	1.74577
PTPN11	0.86	F11	1.27079	LINC02298	1.74185
FLJ32679	0.86	GNB3	1.27005	LOC101927755	1.74085
CR603450	0.86	TMED7-TICAM2	1.26675	HLA-DRB4	1.73857
SNX16	0.86	CTSW	1.26383	TRIM47	1.73857
DPY19L3	0.86	LOC101927809	1.25708	LOC100132741	1.73751
TRIP11	0.86	GFAP	1.2568	KRTCAP3	1.73675
KIDINS220	0.86	LINC00928	1.25624	CCDC103	1.73557
SLC19A2	0.86	LINC01882	1.25562	USP32P1	1.7354
LOC150759	0.86	HPDL	1.2555	SYT13	1.73524
AK125129	0.86	LOC102724265	1.25059	C1QA	1.73053
SCFD1	0.86	ACADL	1.24851	LOC105376633	1.72834
E2F7	0.85	LOC100507387	1.24702	EFS	1.72829
ATP10D	0.85	TMED1	1.24676	NKILA	1.72817
BE780682	0.85	CFAP65	1.24539	GPRIN2	1.72817
AK023400	0.85	GAB4	1.24514	CYP26A1	1.72634
AF187554	0.85	CLIC3	1.24505	C8orf22	1.72074
BE156557	0.85	MUCL1	1.24444	CBLN1	1.72074
DST	0.85	BPI	1.24431	LOC100506082	1.71569
C10orf137	0.85	LOC644145	1.23526	LINC01913	1.71439
ADCY9	0.85	LOC101928565	1.23487	LOC729652	1.71296
ABCC5	0.85	SUSD2	1.23228	IRF4	1.71251
CBWD5	0.85	SLC6A20	1.22596	BIRC7	1.70841
CEP70	0.85	C14orf132	1.22498	KRT27	1.70327
THC2656699	0.85	LINC00364	1.22336	KCNMB2-AS1	1.70187
CR626222	0.84	LINC01485	1.2178	B3GNT4	1.70122
AV753543	0.84	PSD2-AS1	1.2178	VANGL2	1.70081
GMFB	0.84	KLK14	1.2143	RASL12	1.70021
AQP11	0.84	LOC101928994	1.21074	LINC01990	1.69761
GALNT7	0.84	ERP27	1.21009	SPTBN5	1.68916
GEM	0.84	BMS1P4	1.20784	SNORD115-44	1.68306
AY831680	0.84	LINC02375	1.20292	BLACAT1	1.68306
YOD1	0.84	ARHGEF17	1.19986	EEF1AKMT3	1.68306
AK026338	0.84	TCEAL2	1.19798	CXXC4	1.68306
AK307629	0.84	COX4I2	1.19438	FZD9	1.68165
SNORA24	0.83	LINC01729	1.18081	NKTR	1.67843
HISPPD1	0.83	SLC16A13	1.17966	PDHA2	1.67494
CUL5	0.83	OPN4	1.17595	MRPL23-AS1	1.66994
TTC3	0.83	C9orf24	1.17578	BPIFB2	1.66994
AB002449	0.83	CCDC70	1.17383	ACVR2B-AS1	1.6689
BX097783	0.83	CD5	1.17094	LINC00622	1.66532
NegativeControl	0.83	LOC101928887	1.16847	IGSF9B	1.6577
IQGAP2	0.83	MST1	1.16202	KRT80	1.64982
A_32_P2303	0.83	CYP17A1	1.16057	STAU2-AS1	1.64656
BC033052	0.83	ZXDA	1.15995	CCDC110	1.64109
SF1	0.83	LCN15	1.15768	PAGE2	1.63745
THC2727342	0.83	HAVCR1	1.15222	RNVU1-1	1.63509
C1orf63	0.83	DUSP6	1.15047	TREML4	1.63488
LAPTM4A	0.83	FBXO24	1.1499	SCN2B	1.63129
CFDP1	0.83	FAM228A	1.1499	IGFBP3	1.6309
MIAT	0.82	TTTY1	1.14921	MTNR1B	1.62801
ATR	0.82	CTDNEP1	1.14918	EME2	1.61957
BNIP3L	0.82	HTRA3	1.1489	PRSS50	1.61955
AK054826	0.82	TTC9B	1.14433	TMEM100	1.61918
SLC25A24	0.82	RPL36A	1.13976	CYP26C1	1.61161
BC053353	0.82	LOC255187	1.13852	TPTE2P3	1.60945
LCOR	0.82	TEX28	1.13567	BAALC-AS2	1.60627
THC2744561	0.81	TWIST2	1.12665	SLC25A30-AS1	1.60046
AK022268	0.81	STX17-AS1	1.12606	RFPL3	1.59777
BX091936	0.81	LINC01410	1.12456	NMUR1	1.59765
THC2670421	0.81	TM4SF5	1.12425	LOC100132215	1.59009
THC2620541	0.81	ADGRG3	1.12035	LINC01136	1.58543
ANKRD20A2	0.81	JAKMIP2	1.12027	MKX-AS1	1.58307
A_32_P201616	0.81	LOC100506790	1.11962	MS4A10	1.57648
ERLIN1	0.81	OMA1	1.11962	LINC01054	1.57535
THC2614876	0.81	ANKRD22	1.11802	HMGCS2	1.56675
AK023542	0.81	C7orf57	1.11777	SLC51B	1.5654
THC2525583	0.8	PRSS37	1.11728	LOC101929715	1.56256
A_32_P151570	0.8	LINC00395	1.11667	LINC00880	1.56151
C3orf63	0.8	DEFB124	1.11663	PATE4	1.56068
TMEM49	0.8	URAD	1.11658	LINC02324	1.56033
MTERF	0.8	HCG9	1.11513	CALML3-AS1	1.54654
RALBP1	0.8	KCNA1	1.11318	PDZK1IP1	1.54435
AK024147	0.8	SLC39A5	1.10838	FOLR1	1.53189
A_24_P916853	0.79	LINC01973	1.10149	INMT-MINDY4	1.52442
GREB1	0.79	GAPDHS	1.10076	MPIG6B	1.51902
RNF34	0.79	SERPINF2	1.10003	GPD1	1.51357
TSGA14	0.79	ASB17	1.09938	LINC02393	1.51323
FLJ40330	0.79	KRT14	1.09819	HAO2	1.50696
KIAA0485	0.79	ADGRF1	1.09542	TRIM10	1.50188
THC2655505	0.79	LINC01338	1.09154	ANKRD66	1.50157
ZNF294	0.79	LUCAT1	1.09054	NXPE2	1.50037
PPCS	0.79	COL11A2	1.09048	LGI4	1.49951
CCDC41	0.78	LINC01624	1.08623	LOC285847	1.49557
CNTLN	0.78	LINC01819	1.08462	CYP7A1	1.49067
CYTB	0.78	KIF25-AS1	1.08461	UBE2E1-AS1	1.49037
THC2753968	0.78	LOC101928844	1.08318	DMRTB1	1.4902
AF090926	0.78	FAM87B	1.08314	CD2	1.48469
BMS1	0.78	WISP3	1.08223	PCAT6	1.47927
PAIP1	0.78	LOC285593	1.08172	LINC02182	1.47927
ARL13B	0.78	DCHS1	1.08114	LOC339666	1.47927
GPAM	0.78	SLC6A1	1.08086	PDIA2	1.47927
AK093521	0.78	SMN2	1.07786	TFF2	1.47927
UTRN	0.78	ICOS	1.07606	NRTN	1.47883
TAOK3	0.78	AADACL2	1.07471	CX3CL1	1.47837
CAPN1	0.78	SIGLECL1	1.07155	FAM225A	1.4689
AF257098	0.78	BCAM	1.07129	MAFA	1.46755
GOLGA4	0.78	MANEA-AS1	1.07026	EWSAT1	1.46636
CBX1	0.77	NR1D1	1.07021	RDH16	1.46028
RBBP6	0.77	FRZB	1.06844	CD40LG	1.4533
TWF1	0.77	PCDHB2	1.068	TTC22	1.45271
THC2632459	0.77	CEACAM7	1.06475	LOC101929679	1.45243
PRPF4B	0.77	ACSM4	1.06218	CDH16	1.44885
FAM46A	0.77	CDHR5	1.0618	LIN28B-AS1	1.44824
NGLY1	0.77	ZNF205-AS1	1.05935	MIR378D2	1.44788
MT1E	0.77	CYP26A1	1.05858	KCNC4-AS1	1.44788
ARNTL2	0.77	FAM209B	1.05488	HOXC11	1.44788
AK000420	0.77	ARGFX	1.05246	AQP6	1.44788
AK093982	0.77	MZB1	1.05035	MIR345	1.44788
A_23_P136013	0.77	CXCL3	1.05016	MYCN	1.44788
THUMPD1	0.77	PPIC	1.04742	TCEAL7	1.44788
SMURF2	0.77	PDE1B	1.04717	VCAM1	1.44788
MCTP2	0.77	MINOS1-NBL1	1.04687	CHMP4C	1.44333
KIAA0754	0.77	RARRES2	1.0466	LINC01430	1.43901
ASPM	0.77	CD2	1.04647	FAM84B	1.43901
FANCM	0.77	ALOX15B	1.04609	PEG10	1.43901
SLC46A3	0.77	COPZ2	1.04588	SIGLEC8	1.43901
PHF20L1	0.77	SMIM25	1.04522	KRT26	1.43901
C15orf5	0.77	SAPCD1-AS1	1.04313	LINC02372	1.43901
THC2523877	0.77	GNMT	1.04006	IL21	1.43901
ENST00000324982	0.77	LOC101927755	1.03435	RPL36A	1.43901
SSFA2	0.76	SERF1A	1.03219	TSPAN10	1.43796
IGF2BP3	0.76	IL17C	1.02883	EDN2	1.43733
DKFZP586B0319	0.76	LRRC3-AS1	1.02728	F11	1.43589
TRIM37	0.76	ACOT4	1.02728	KRT15	1.4312
A_23_P89841	0.76	PCOTH	1.02728	MAB21L3	1.43008
A_23_P170713	0.76	NXPH3	1.02453	CASQ1	1.42833
SPTLC3	0.76	CRB3	1.02078	FOXA3	1.42765
HSPA4L	0.76	C11orf88	1.01951	SOD3	1.42533
ENST00000344693	0.76	LINC01814	1.01909	KRT17	1.42531
AF116619	0.76	GPRC6A	1.01687	LINC00383	1.42226
IFT81	0.76	SMLR1	1.01272	FRG2C	1.42212
THC2558699	0.76	BOLA1	1.01189	LINC01230	1.42212
A_32_P18300	0.76	USP6	1.01037	IHH	1.42212
THC2639056	0.76	DNAJB4	1.0077	LINC00642	1.42212
G3BP2	0.75	AP4B1	1.00639	AVPR1B	1.42212
RDH10	0.75	LINC01845	1.00485	CABP4	1.42212
THC2611971	0.75	LINC01267	1.00265	MMP27	1.42212
PCGF3	0.75	FAM138E	1.00264	DNAJC5G	1.41961
PKN2	0.75	D21S2088E	1.00163	ABO	1.41937
CCNYL1	0.75	FENDRR	0.996971	LINC02120	1.4087
CR598364	0.75	LINC01151	0.993102	NMS	1.40788
TPR	0.75	SPATA41	0.987446	RSPO1	1.40713
AK094799	0.75	MS4A6E	0.983717	CPXM1	1.40621
AK123264	0.75	COL12A1	0.98363	POTEC	1.40617
PHF6	0.75	FAM26D	0.983326	PCDHB9	1.40544
ZNF286A	0.75	LINC00383	0.982481	AATK-AS1	1.40469
AF222023	0.75	PLA2G2D	0.980631	SLC35G5	1.40389
THC2659519	0.75	CAMP	0.980391	LOC101927418	1.40328
THC2737770	0.75	LEMD1-AS1	0.979415	RNU12	1.39695
CPNE8	0.75	LOC728040	0.978841	SNORD115-9	1.39682
ATF7IP2	0.75	CHRDL2	0.978416	USH1G	1.39681
SRP14	0.75	LINC00899	0.97805	IGSF22	1.39491
PIBF1	0.75	ALDOB	0.976768	FGFBP2	1.39445
HMOX1	0.75	FLJ34503	0.975124	TAC1	1.3913
CCDC91	0.75	KRT31	0.974528	KCNK18	1.39089
PANX1	0.75	DDC	0.973222	CRIP1	1.38861
U72516	0.75	LINC01659	0.973102	LRRC55	1.38861
VPS13C	0.74	LINC01799	0.972769	EDDM3B	1.38861
FAM98A	0.74	FBP2	0.971385	LINC01873	1.38861
TET2	0.74	LRFN3	0.971082	CXCL8	1.3858
MTERFD3	0.74	LOC100132111	0.969429	KRT9	1.38452
HTRA3	0.74	UNC45B	0.969285	FGFR4	1.37661
CHD7	0.74	LINC00311	0.968463	LOC105371433	1.3743
DYNC1LI2	0.74	DPEP3	0.964935	DMP1	1.37251
STX6	0.74	LINC02037	0.964661	BPIFB6	1.37249
RPGRIP1L	0.74	LINC02185	0.963413	ZNF474	1.36781
KIF16B	0.74	AHNAK2	0.961673	CILP	1.36736
ZNF711	0.74	MADCAM1	0.961012	ITPR1-AS1	1.36662
SF3B1	0.74	ZNF835	0.960869	LOC284412	1.36574
AK025613	0.74	PPIAL4E	0.960083	IL11	1.36546
THC2739352	0.73	TTN-AS1	0.959369	PROKR1	1.36497
BTAF1	0.73	GLB1L3	0.955681	LINC01571	1.36397
DHX29	0.73	ACTN3	0.95383	SLC40A1	1.36397
BF514006	0.73	B3GALT4	0.952758	TMPRSS13	1.35924
MICALCL	0.73	PPP1R1B	0.951489	NAALADL1	1.35836
C9orf41	0.73	RANBP3L	0.948838	LOC401554	1.35828
RGPD5	0.73	LOC101928323	0.943712	RNF215	1.35776
BC008192	0.73	LINC02167	0.939955	CTAGE15	1.35557
MIA3	0.73	GABRA1	0.938048	IDI2	1.35321
USP47	0.73	MIF-AS1	0.935896	AHSG	1.34935
KIAA1946	0.73	CLEC7A	0.935875	LINC01269	1.34919
ANKRD32	0.73	DEPDC1-AS1	0.933032	OPTC	1.34526
SLC2A13	0.73	PRSS22	0.929173	LINC00858	1.34408
FAM92A1	0.73	SLC6A7	0.928763	C7orf71	1.34217
CLCN3	0.73	TTC34	0.927819	KEL	1.3414
UBE2D1	0.73	ARF4-AS1	0.927798	HIST1H2BE	1.34007
CLN8	0.73	LOC101928053	0.927771	LINC00479	1.33848
GCC2	0.73	CEACAM5	0.927702	CLEC2L	1.33789
THC2685727	0.73	NA	0.92532	INA	1.33505
ESF1	0.73	ABCA9-AS1	0.924213	ZBTB42	1.33486
TXNDC4	0.73	PPIAL4C	0.923971	FMC1	1.33274
LIG4	0.73	CASP14	0.921567	IL37	1.33126
THC2633747	0.73	PLEKHG6	0.920164	SLC44A4	1.33072
CLK4	0.73	GLP1R	0.9195	LINC01502	1.32785
METTL3	0.73	TUSC5	0.919435	CELA3A	1.32654
ENST00000393515	0.73	MAFG	0.918817	CLEC4F	1.32593
THC2616009	0.72	MYO1A	0.91827	GOLGA6D	1.32392
DPY19L4	0.72	RNU5E-1	0.917862	TMEM249	1.32156
ZNF432	0.72	CYP3A7-CYP3A51P	0.917134	ZNF300	1.32152
AL109784	0.72	PPP1R1A	0.91605	LINC00395	1.32129
AK092379	0.72	PEX19	0.913671	LINC00410	1.31994
MAP3K1	0.72	HLA-DMB	0.912786	SMCO1	1.3197
RRAGD	0.72	LINC00702	0.910849	HNF1A-AS1	1.31967
AK021668	0.72	PGLYRP1	0.909727	NYNRIN	1.31537
KIF21A	0.72	LOC101928595	0.909334	PI15	1.31492
THC2536659	0.72	CASC20	0.908489	MAT1A	1.31347
SNX14	0.72	LOC101927770	0.906224	SFTPC	1.31223
A_24_P234871	0.72	LEUTX	0.90558	NCR2	1.31022
tcag7.903	0.72	LOC102723427	0.90507	LOC101929622	1.30913
AK024900	0.72	LINC02362	0.902908	LOC102723809	1.30871
MT1L	0.72	PRCD	0.90039	IGLL1	1.30631
FLJ13611	0.72	KISS1	0.898139	LOC101929123	1.3029
A_32_P131583	0.72	ZIC4	0.898139	F13B	1.29813
PVRL3	0.72	LINC00158	0.897879	CRYGB	1.28745
ND6	0.72	SERP2	0.897322	LOXL4	1.28624
GDAP1	0.72	SP5	0.895473	RIMBP3B	1.28581
FLJ36840	0.72	IRGQ	0.893582	LINC01281	1.28369
ENST00000382909	0.72	CEBPA	0.893429	LINC00437	1.28187
MT1X	0.72	CYP4F3	0.892702	RNVU1-17	1.27989
IDE	0.72	CYP2B6	0.892279	TMCO2	1.277
BC071797	0.72	RBMXL2	0.892061	GPRC6A	1.27367
AA541413	0.71	ABHD11-AS1	0.891954	LOC101927964	1.27343
ZNF654	0.71	CDHR1	0.891664	RBFA	1.26972
A_32_P194182	0.71	LINC01354	0.889553	ETNK2	1.26927
AF271776	0.71	CLDND2	0.889553	MS4A2	1.26849
GBP3	0.71	CASC22	0.889553	FGF17	1.26824
IFT80	0.71	TMEM95	0.889553	LINC02113	1.26577
BG536553	0.71	ZNF655	0.889553	PPP4R1-AS1	1.26502
C21orf66	0.71	FOXN4	0.888879	GJC3	1.26314
LOC131054	0.71	ZNF878	0.888245	LINC01018	1.26072
CV573177	0.71	SLC7A11	0.887716	FAM238A	1.26031
DBT	0.71	PABPC5-AS1	0.887334	MUC6	1.25994
SLC37A3	0.71	SOX8	0.887112	PXDC1	1.25747
AK023526	0.71	BARHL1	0.886923	SFRP5	1.25747
N4BP2	0.71	H3F3AP4	0.884823	SPATA8	1.24929
AL390214	0.71	MIR3671	0.882783	LOC100506098	1.24914
BX090412	0.71	SPATS1	0.882748	C21orf62	1.24729
AF086126	0.71	POTEC	0.882344	BSN-AS2	1.24657
CA314451	0.71	PLP1	0.881254	CXCL2	1.24616
SCYL2	0.71	SSH3	0.880525	TMPRSS11B	1.24556
KBTBD8	0.71	HMGN3-AS1	0.880485	LOC731157	1.24491
HIGD1A	0.71	LOC339666	0.878945	APOF	1.23926
CLTC	0.71	MIR320D1	0.87749	LOC100507194	1.2391
ITGA4	0.71	CALHM1	0.874584	ZBP1	1.2376
DRAM	0.71	RAB6C	0.874061	LINC02111	1.23295
C8orf59	0.71	C14orf28	0.872584	FAM157B	1.23143
RLF	0.71	LINC00941	0.872476	PSD	1.22778
DKFZp667G2110	0.71	LINC01310	0.870029	PPP1R32	1.2275
MTFR1	0.7	LINC02130	0.870029	HIF1A-AS1	1.22717
THC2647388	0.7	LINC01219	0.869753	LINC00311	1.22484
CCDC88A	0.7	C11orf72	0.869169	C1QL4	1.22246
CD239706	0.7	LINC02265	0.868775	GPC2	1.22165
AK094046	0.7	CLEC18C	0.866403	MDFI	1.21986
MED13L	0.7	TSPAN19	0.866234	CD79B	1.21917
KCTD3	0.7	CRHR2	0.864692	PAX1	1.2184
MT1M	0.7	LOC101927079	0.86313	ULBP3	1.21827
ZNF680	0.7	CSH2	0.857319	LOC101929473	1.21805
MT1G	0.7	MORF4L2-AS1	0.856909	LOC100507144	1.21704
MBTD1	0.7	RNVU1-17	0.856251	HOXC13	1.21704
JMJD1A	0.7	NPIPA5	0.856213	PAK6	1.21704
THC2674691	0.7	DPT	0.855769	RTP3	1.21704
PHACTR2	0.7	ZNF677	0.850105	EFCAB6-AS1	1.20886
REEP5	0.7	LINC00278	0.849211	SCNM1	1.2045
KIAA1731	0.7	MYT1	0.848199	LINC01133	1.20297
FYCO1	0.7	LINC01257	0.84771	CARNS1	1.20292
MT1H	0.7	OPRL1	0.846304	EME1	1.20178
THC2704047	0.7	LOC102724927	0.846277	WDR97	1.20063
ARRDC3	0.7	EIF1AY	0.845824	CAMP	1.20031
ND1	0.7	LOC102723661	0.845357	LINC01068	1.19938
ZHX1	0.7	LINC01280	0.84523	ZC2HC1C	1.19685
DLEU2	0.7	C2orf80	0.844871	EQTN	1.1912
ENST00000340556	0.7	USP32P1	0.843532	DEPDC1-AS1	1.18762
IFT74	0.69	TLX2	0.843532	TEX35	1.18649
ZNF83	0.69	PPY	0.843532	CHRM1	1.18253
DLG7	0.69	SLFNL1-AS1	0.843108	LINC00885	1.18226
MT1B	0.69	LOC105375014	0.842927	CEACAM7	1.18202
IPO5	0.69	SMIM22	0.841824	CCKAR	1.18132
ARID4B	0.69	SRXN1	0.841342	SERP2	1.18111
MED17	0.69	ZMYND12	0.840133	HCN4	1.18087
SMC4	0.69	MYOG	0.839355	SP8	1.17895
PROS1	0.69	LOC106699570	0.83709	HIST2H3D	1.17692
NIN	0.69	C22orf15	0.836346	NTN5	1.17494
PHTF1	0.69	LINC01028	0.836017	C6orf229	1.17397
THC2775001	0.69	SPINK8	0.835948	LOC101928371	1.17244
PDE7A	0.69	PI15	0.835736	HLTF-AS1	1.17237
RAB31	0.69	FGD2	0.83566	KCNJ10	1.17008
ZNF25	0.69	YPEL4	0.834748	HTRA3	1.16993
UBE2K	0.69	ADM	0.832396	KLRC3	1.16977
RBM8A	0.69	LOC105274304	0.832036	PANX2	1.16481
UGCGL2	0.69	LINC01529	0.832012	C19orf67	1.1621
BC035091	0.69	BIRC7	0.830716	VCX3A	1.16107
DUSP22	0.69	LINC00682	0.830211	TMEM212	1.15748
DGCR8	0.69	SLC34A1	0.829364	DUSP26	1.15633
AK091904	0.69	LINC01381	0.829236	ACSM2B	1.15496
FBXO9	0.68	TMPRSS11F	0.826377	LUCAT1	1.14867
LOC91431	0.68	LOC101929551	0.825994	SLC13A5	1.14735
FRYL	0.68	HEPACAM	0.825294	GYPA	1.14713
GNRH1	0.68	KLKB1	0.823758	CD300E	1.14597
SRPK2	0.68	RIMBP3	0.822974	CD80	1.14516
DEPDC7	0.68	CCDC187	0.820959	ARAP3	1.14474
BC013389	0.68	LINC01372	0.820216	ROBO4	1.1445
THC2692669	0.68	NPIPA7	0.820083	LOC102723883	1.14253
ZNF644	0.68	CALCRL	0.819325	LINC01879	1.14195
TSPAN12	0.68	KCTD19	0.81685	C2CD4C	1.1415
SWAP70	0.68	FAM13A-AS1	0.816635	TNFAIP8L2-SCNM1	1.14084
AF075045	0.68	PRKG1-AS1	0.815062	PTCSC3	1.14084
CDADC1	0.68	WFDC8	0.814875	OGFR-AS1	1.14084
BRWD1	0.68	KIR2DL1	0.814534	HLA-F	1.13739
KIAA1109	0.68	POU3F1	0.814513	CNTNAP3B	1.13523
FAM122C	0.68	GRID1-AS1	0.814135	OARD1	1.1348
CCDC84	0.68	PHGR1	0.813802	GBP1	1.13361
LOC100128108	0.68	LOC102724323	0.813609	IL27	1.13275
ANXA1	0.68	SHISA7	0.81242	LINC02359	1.13059
SLC35A3	0.68	NLRP8	0.811664	FAM217A	1.12983
RABGAP1L	0.68	PCLAF	0.810329	SERPINB12	1.12794
PAIP2B	0.68	LOC101927131	0.810053	LOC101929657	1.12769
BC041959	0.68	LOC654841	0.806917	LINC01248	1.12292
BIRC3	0.68	LINC01049	0.806703	APBB3	1.11997
SLC16A6	0.68	HCAR1	0.805563	CPO	1.11984
XR_019164	0.68	LINC01593	0.805553	RORB-AS1	1.11941
AK026351	0.67	NDUFB6	0.803822	TCN2	1.11857
KTN1	0.67	LINC01075	0.802702	LINC01381	1.11808
DPY19L2P4	0.67	KRT86	0.800489	LMOD2	1.11767
ZMYND11	0.67	KRT13	0.797812	LEMD1-AS1	1.11767
C14orf118	0.67	OR8B8	0.79673	OR2B11	1.11719
ERGIC2	0.67	TIGIT	0.79596	LINC00656	1.11568
A_32_P9931	0.67	ECEL1	0.794501	BPIFA3	1.11549
FNTA	0.67	FAXC	0.792567	MIA-RAB4B	1.11215
RNF19A	0.67	HSD11B2	0.792309	LOC101928944	1.11215
TBC1D8B	0.67	LOC101929452	0.792147	LINC02287	1.11215
MAP3K2	0.67	CHP2	0.791405	MIR6859-1	1.11215
BX094246	0.67	SLITRK4	0.790064	LINC01335	1.11215
ENST00000399576	0.67	TAGLN	0.789801	PROKR2	1.11215
PTPN2	0.67	PDZD7	0.788982	CLDN23	1.11215
C10orf18	0.67	LOC100507373	0.787838	AWAT1	1.11215
TRMT11	0.67	KCNJ1	0.787571	EMX1	1.11215
C12orf48	0.67	MIR22HG	0.787402	MAPK15	1.11215
ENAH	0.67	KCNA6	0.786335	LINC00346	1.11215
TAF9B	0.67	CALCOCO1	0.786	C2orf71	1.11215
PHIP	0.67	MS4A10	0.783874	C10orf120	1.11215
GUSBL2	0.67	ANGPT4	0.783809	MIR323A	1.11215
FLJ38973	0.67	LINC01260	0.782654	TGIF2	1.11215
CEP110	0.66	F13B	0.780862	CCL13	1.11215
A_24_P477102	0.66	LINC01541	0.77926	SPRR2A	1.11215
STAM2	0.66	IFT27	0.778258	ST20-MTHFS	1.11207
RAD54B	0.66	FGF1	0.777584	C9orf131	1.11175
CR625971	0.66	BRWD1-AS1	0.776834	LIPF	1.11114
CTGLF4	0.66	LINC02256	0.773313	LRRC72	1.10987
ZDHHC17	0.66	SH2D5	0.772453	DYNAP	1.10981
ENST00000400700	0.66	TMPRSS2	0.771818	VSTM1	1.1095
ANKRD12	0.66	LINC01533	0.771239	ARGFX	1.1094
HEATR5A	0.66	MAT1A	0.770048	LINC01979	1.10902
PBRM1	0.66	TRO	0.769059	VSIG8	1.10902
LOC728411	0.66	ASGR1	0.767982	LHX1	1.10849
ADAT2	0.66	SLC13A5	0.76782	NQO1	1.10803
BY796363	0.66	LILRB1	0.767516	CYP21A1P	1.10748
HMGN1	0.66	TRIM39-RPP21	0.765479	LOC101927196	1.10676
ZNF638	0.66	LRIT1	0.764363	OOSP2	1.10333
GOLT1B	0.66	TTC24	0.763646	OPN1LW	1.10291
A_32_P100475	0.66	MTX1	0.763563	CST8	1.09908
TXNDC16	0.66	ZNF418	0.763231	LPIN3	1.09855
RNF138	0.66	APOA1-AS	0.763031	GIMD1	1.0957
MBD2	0.66	AP4B1-AS1	0.762119	CPEB2	1.09549
ENST00000369739	0.66	EFCAB14-AS1	0.7619	COL2A1	1.09523
THC2533385	0.66	LOC100507412	0.758108	OTOP2	1.09477
THC2656519	0.66	DRD2	0.75722	EHHADH-AS1	1.0929
TOP2B	0.65	HSPB7	0.757211	USP35	1.08584
THC2666547	0.65	GCLM	0.756731	DPEP1	1.08354
A_32_P90468	0.65	GVQW2	0.755317	SMCR2	1.08303
C12orf4	0.65	HIGD1C	0.754658	MNX1-AS1	1.08183
SFRS18	0.65	C1QC	0.754444	RPRML	1.08045
A_24_P281175	0.65	DNAJB5-AS1	0.753935	ETNPPL	1.08043
ZCRB1	0.65	RGS9BP	0.753825	FBXW12	1.07949
CHD9	0.65	COL18A1	0.751248	FAM209B	1.07918
ONECUT2	0.65	LINC01254	0.750931	SSX3	1.07832
KIAA1009	0.65	C1orf137	0.749385	LINC02314	1.07718
FKBP5	0.65	LINC01545	0.748782	KCNJ18	1.07671
SH3YL1	0.65	AQP6	0.748185	NOXO1	1.07671
AK098220	0.65	C10orf91	0.746104	BPIFB3	1.07671
AK023737	0.65	LOC103908605	0.742918	HPN-AS1	1.07565
AK123107	0.65	HRG	0.742692	APLP1	1.07529
PCDH9	0.65	PCAT4	0.742273	EDDM3A	1.07469
AK026659	0.65	KRT5	0.741612	CYB5R2	1.07425
AL832820	0.65	TSGA10IP	0.741496	SDR9C7	1.07201
ERBB2IP	0.65	LINC02102	0.739067	HSPB7	1.07201
ZDHHC11	0.65	BEST3	0.738946	LINC01150	1.0696
LOC220594	0.65	HIST1H3G	0.737879	LINC02148	1.06916
LOC100134282	0.65	LOC101927851	0.737274	OTOL1	1.06916
DQ786266	0.65	LINC01649	0.735715	TDRD6	1.06916
THC2503773	0.65	LOC100128386	0.734355	LGALS7	1.06916
AKAP9	0.65	ITIH1	0.733897	HPCAL4	1.06916
RPS6KA5	0.65	FGF3	0.733885	LINC00506	1.06855
PIP5K3	0.65	CCDC144B	0.733885	METTL21C	1.06841
MYEF2	0.65	DNAJB8-AS1	0.733885	ZNF471	1.06791
PMS1	0.65	IL3	0.733885	NYAP1	1.06401
SAMD9L	0.65	SCRT2	0.733885	LINC00221	1.06401
KIAA0372	0.65	ZNF790	0.731683	LINC00957	1.06382
C1orf27	0.65	CRTC2	0.731092	LINC00612	1.06302
PRO2852	0.65	SLC30A2	0.730675	SYNM	1.06294
BTBD7	0.65	PYROXD2	0.730376	LINC00507	1.06266
CD104030	0.64	VILL	0.729584	CLCA1	1.0623
A_32_P69683	0.64	GABRD	0.728644	TRIM54	1.05977
A_32_P155043	0.64	TMEM88	0.728044	HCG22	1.05798
CR617865	0.64	METTL1	0.726883	RTL9	1.05782
STK4	0.64	CACNA2D4	0.725792	HSPA1L	1.05554
DCP2	0.64	KLK5	0.725719	ZNF404	1.0546
BE877371	0.64	GABRG2	0.725567	SPN	1.05427
DYNLT3	0.64	SPP1	0.725003	ODF3L1	1.05406
AK096984	0.64	LINC00528	0.724475	LOC102723322	1.0523
CCDC132	0.64	ZNF436-AS1	0.723801	TTTY10	1.05184
PHLPPL	0.64	ZNF606	0.72314	PRDM14	1.04967
BC006998	0.64	RASD2	0.722769	LINC02274	1.04907
FNIP2	0.64	IL7R	0.722534	LINC00570	1.04786
ASF1A	0.64	LINC00506	0.722077	FRG2	1.04786
FAM40B	0.64	CAND1.11	0.721187	LILRA2	1.04713
BACE1	0.64	ZNF594	0.720149	EFCAB1	1.04672
CBR4	0.64	CITED1	0.719923	CT45A10	1.04656
LEPR	0.64	CLCN1	0.716774	FCGR3B	1.04656
CR596670	0.64	TRIM52-AS1	0.716685	LOC105377671	1.04639
EIF2AK3	0.64	FABP3	0.716055	GSTA1	1.04417
LZIC	0.64	LOC101928441	0.715738	FAM110D	1.04301
A_32_P16989	0.64	LINC00637	0.715737	TRIM49D2	1.04098
ZNF271	0.64	LOC100379224	0.714984	CEACAM6	1.04064
CSPP1	0.64	HOXB-AS1	0.71347	LOC105375014	1.04038
CCDC66	0.64	LINC01812	0.71346	PRR9	1.03967
RPS6KB1	0.64	MYH7	0.713449	LINC01386	1.03836
THC2586764	0.64	PGLYRP3	0.712992	KIAA0087	1.03699
A_24_P676259	0.64	NGB	0.712422	LOC101928595	1.03643
SYT4	0.64	FLJ37201	0.712101	SH3BP1	1.0356
HCFC2	0.64	FAM74A6	0.711778	CABP5	1.03366
A_32_P74901	0.64	LINC00562	0.711647	C11orf42	1.03283
USP6NL	0.64	NOXO1	0.710961	C11orf70	1.03224
LOC149134	0.64	TLR8	0.710224	LINC00636	1.03185
PPM1A	0.64	FZD7	0.708275	ARL2-SNX15	1.03179
NR4A2	0.64	LOC100128770	0.708244	PANO1	1.03146
L40520	0.64	SCUBE1	0.707562	KRTDAP	1.03089
LOC647121	0.64	LINC00301	0.705549	MMRN2	1.03052
LOC85391	0.64	RGPD5	0.705517	FAM180B	1.02822
A_32_P1434	0.64	LINC02359	0.704248	ITGB7	1.02492
ATMIN	0.64	LINC01514	0.704236	APOA1	1.02317
THC2697162	0.64	ZNF493	0.704131	KLK11	1.02238
A_23_P84272	0.64	SLC4A9	0.703919	TRIM39-RPP21	1.02217
PTBP2	0.64	LINC02243	0.703733	LINC01039	1.02061
DEK	0.63	ARMCX1	0.702563	GDNF	1.02023
CLIP4	0.63	POU1F1	0.702467	NTS	1.01705
AL833303	0.63	LINC01658	0.701694	BSND	1.01474
SAR1B	0.63	NPIPB13	0.701551	OR8S1	1.01468
FLJ31306	0.63	TRPM5	0.701481	IGFL2	1.01387
THC2616992	0.63	ZP1	0.701218	NTRK3-AS1	1.01373
ZCCHC2	0.63	FCGR2C	0.701049	FAM213B	1.01215
KIF24	0.63	TP53I11	0.699417	RDH8	1.01199
AA292106	0.63	LENG8-AS1	0.698429	PIR	1.01192
BMS1P5	0.63	GALNT13	0.698277	EPO	1.01172
HMMR	0.63	LINC01424	0.693076	AGPAT1	1.01034
AY358681	0.63	HACD4	0.692845	SPACA1	1.00935
MYCBP2	0.63	LINC01749	0.69266	PIGC	1.00864
AI571129	0.63	FXYD1	0.692583	TCP10L	1.00812
IRX3	0.63	ARHGDIG	0.691702	LINC01821	1.00184
MS4A3	0.63	NKX2-5	0.691104	PRDM12	1.00176
CDCA7	0.63	GAS5-AS1	0.691023	C14orf177	1.00102
A_32_P211048	0.63	FAM66B	0.689979	ZMYND12	1.0001
THC2598362	0.63	MEPE	0.689425	PRR32	0.999678
THC2631989	0.63	SLC7A11-AS1	0.688732	MIR4786	0.999678
A_23_P216071	0.63	FAM182A	0.687125	LOC101059948	0.999678
THC2662514	0.63	TTC22	0.686997	TNFAIP8L1	0.999678
ANKIB1	0.62	SLC51A	0.686853	SPANXN4	0.999678
DLD	0.62	CRHBP	0.686661	TFF3	0.999678
GOLGA6	0.62	COX7A1	0.685832	IL1F10	0.999678
TNRC6A	0.62	MUC5B	0.685803	RNF144A-AS1	0.999633
PCOLCE2	0.62	LSMEM1	0.685685	LINC01354	0.998199
MYBPH	0.62	FAM180A	0.685423	PKLR	0.997833
RBM25	0.62	OR4F4	0.685349	KLK9	0.997441
THC2528990	0.62	ZNF227	0.684531	ADGRA1	0.996806
SLC26A6	0.62	PRSS12	0.683848	ATP4A	0.996337
CLDN12	0.62	LOC100996447	0.683637	SERPINA9	0.995524
LOC643014	0.62	LINC00507	0.681576	ZNF878	0.993439
BC037740	0.62	TRIM39	0.680505	LOC100996693	0.991917
RAD51AP1	0.62	UCMA	0.680094	LINC02366	0.989098
A_32_P71212	0.62	PELI3	0.678496	G6PC	0.988363
SLAIN2	0.62	FBXO15	0.677964	SGSH	0.987938
MBOAT2	0.62	RGS21	0.677713	NFATC4	0.986931
BC000206	0.62	LINC01634	0.677502	PKP1	0.985305
BF831953	0.62	TEX33	0.676766	GABARAPL1	0.98504
CR600369	0.62	DAO	0.676051	PTHLH	0.983918
PFN4	0.62	FAM209A	0.675737	HAS1	0.983378
C6orf204	0.62	LINC00603	0.675523	BAALC	0.982694
TAX1BP1	0.62	JUN	0.67548	ADCYAP1R1	0.982325
ZNF268	0.62	LOC100130331	0.674701	LIN7B	0.981229
RYBP	0.62	CTRL	0.674665	LINC01247	0.980065
ZNF44	0.62	XIRP1	0.67345	NPY4R	0.979533
THC2719547	0.62	ALOXE3	0.672053	CELSR3	0.979396
THC2694735	0.62	PAEP	0.671322	THNSL2	0.978414
CHORDC1	0.62	B3GNT3	0.669706	DMRTA2	0.978236
WDR20	0.62	HLA-DOB	0.669595	LOC102723385	0.978204
C3orf64	0.62	LYZL2	0.669117	C1orf61	0.976799
UCP3	0.62	C1orf105	0.668514	FOXD2-AS1	0.976678
AF289610	0.62	HHLA1	0.66838	SAGE1	0.975143
CDYL	0.61	CABP4	0.66827	FAM74A1	0.974875
MAGI1	0.61	S100A2	0.667198	CSNK2B	0.972192
NAP1L5	0.61	SPAG11B	0.66644	CLECL1	0.971932
PUS7L	0.61	SERINC2	0.662778	GPR158-AS1	0.971587
ENST00000308482	0.61	LOC101928107	0.661553	LINC01736	0.970603
LOC100133315	0.61	ZNF469	0.658877	C12orf71	0.970113
AK025669	0.61	LTK	0.658533	LINC00488	0.96832
SOCS6	0.61	CFAP46	0.65811	NAMA	0.961688
SETD5	0.61	SLC13A1	0.656251	MIR3188	0.959157
THC2742325	0.61	CR2	0.655921	LINC01718	0.959157
AL833452	0.61	DNAJC14	0.655806	MIR4697HG	0.959157
DDX46	0.61	IL5RA	0.653757	LOC340017	0.959157
TMEM87A	0.61	MMRN1	0.652571	HNRNPCL2	0.959157
BC064349	0.61	LOC101928012	0.651917	VCX2	0.959157
PLAA	0.61	FADS6	0.651708	RNF43	0.959157
LYST	0.61	ZNF570	0.651266	PCDHB15	0.959157
GALNT4	0.61	KLF15	0.651265	SOX17	0.959157
GNG10	0.61	ZNF679	0.65123	OTOP3	0.958869
BU173515	0.61	ACPP	0.651153	P3H3	0.958245
ZFYVE26	0.61	LRRC3	0.650728	ZSCAN5B	0.957671
KIAA0888	0.61	TMEM249	0.65072	CMA1	0.956548
A_32_P160670	0.61	NMS	0.650509	SLC25A2	0.956548
A_24_P75994	0.61	DNAJA4	0.650276	GJA5	0.955991
AFG3L1	0.61	FGF16	0.649919	CYSRT1	0.95456
AK021840	0.61	LOC101927495	0.649329	LINC00893	0.951493
SMC6	0.61	SMR3B	0.647707	TMPRSS2	0.950061
AJ227863	0.61	BIVM-ERCC5	0.646863	GSTK1	0.949545
BM726940	0.61	CCR8	0.646657	SRXN1	0.948657
BC090061	0.61	LOC101927762	0.646361	ITM2A	0.946446
MTIF2	0.61	LINC02099	0.646139	LINC01189	0.945737
AK026896	0.61	GPR20	0.646031	TMEM52	0.94454
CLK1	0.61	LOC100507194	0.645601	SAMD7	0.942586
RP5-1000E10.4	0.6	GHR	0.644463	PRKAG3	0.93999
ZEB2	0.6	USP3-AS1	0.643474	LINC01209	0.939924
NEK1	0.6	LINC01496	0.643474	FOXI3	0.939924
ZNF367	0.6	SPECC1L	0.643474	ME1	0.939251
ANP32A	0.6	PRSS50	0.643474	GHET1	0.936166
C5orf5	0.6	ASIC5	0.643474	LINC01491	0.935492
A_23_P120644	0.6	KLK7	0.643076	SLC26A9	0.934265
GLRB	0.6	S100A14	0.640662	LOC440896	0.934025
JMJD1C	0.6	LINC01465	0.640046	SCN3B	0.93322
AK057576	0.6	PELI2	0.63743	C20orf173	0.932052
A_32_P163472	0.6	BGLT3	0.637169	PLEKHH1	0.9315
LOC100127983	0.6	BPIFB4	0.637098	LIX1	0.930934
SPEF2	0.6	ZNF788	0.637074	FBXL22	0.929913
THC2779319	0.6	P2RY11	0.636913	LINC01021	0.929354
THC2666103	0.6	CALHM3	0.635126	SLC7A11	0.928701
REV3L	0.6	SYNM	0.634895	TPRX1	0.928265
SRP14P1	0.6	BOC	0.634087	IL5	0.928208
LOC644192	0.6	ZSCAN20	0.633504	BTNL9	0.927462
MTERFD1	0.6	LINC01993	0.632399	CHRDL2	0.927285
THC2724111	0.6	GOLGA6D	0.632071	RELL2	0.926016
TSEN54	0.6	DHX58	0.631046	KLHL33	0.925631
ABCB10	0.6	CCDC85C	0.630703	LINC01126	0.922595
APPL2	0.6	SLC44A3	0.630678	PRODH	0.922379
SS18L1	0.6	TGM6	0.630637	CROCC	0.920963
LOC645251	0.6	FRY-AS1	0.629857	WNT9A	0.920355
GOLIM4	0.6	LINC01522	0.629182	FAM27C	0.918088
TBL1XR1	0.6	MUC4	0.628956	ALDH3B2	0.916528
C9orf93	0.6	APOF	0.628587	GOLGA6L2	0.916209
SERTAD2	0.6	LINC02345	0.628578	HSD52	0.916098
MGA	0.6	ZNF543	0.626304	42979	0.913848
SLC25A36	0.6	TOMM34	0.62586	LOC105374366	0.912858
TSC1	0.6	TMPRSS5	0.624782	FOLR3	0.91186
TULP3	0.6	BRICD5	0.624491	SLC6A1	0.910349
ZNF823	0.6	LINC00458	0.624004	TUBB8	0.90922
LIN9	0.6	HLX-AS1	0.622247	TMEM191B	0.909179
USP32	0.59	OR2B2	0.622209	ZNF470	0.903762
DOLK	0.59	DUSP8	0.621598	LOC101927310	0.900891
TCFL5	0.59	SREK1	0.620831	TAAR2	0.900369
CR609715	0.59	LECT2	0.620628	LINC00533	0.899552
RPAP3	0.59	SBDS	0.620482	SLC52A1	0.898409
IGFBP7	0.59	CRYGB	0.619477	EFNB2	0.896731
THC2491622	0.59	RPEL1	0.618541	LINC01495	0.894061
TBK1	0.59	LANCL1	0.616429	GDPD3	0.893986
BMP2	0.59	ALDH3B2	0.615649	MAGEB1	0.893287
ECT2	0.59	ERAP2	0.615298	SECTM1	0.892948
DYX1C1	0.59	SLC18A2	0.615013	SGK2	0.89069
SNRK	0.59	SLC2A10	0.614273	LINC02212	0.889561
CCDC126	0.59	TRIM17	0.612036	LINC00954	0.88818
THC2683069	0.59	VGLL3	0.611442	SMIM23	0.885976
CCDC100	0.59	CCL28	0.610307	FAM66A	0.885973
GLIPR1	0.59	EBI3	0.609312	MUC7	0.885647
BAZ1A	0.59	DIRAS2	0.608564	TAF1A-AS1	0.884318
PIGK	0.59	FOLR1	0.608257	LINC01151	0.882244
A_24_P585660	0.59	PTPRN	0.607999	LINC01265	0.882212
AZI2	0.59	SCGB1A1	0.607507	MUC13	0.881015
ANKRD26	0.59	LINC02199	0.606335	NLRP10	0.880628
AY033611	0.59	PPIAL4A	0.606223	LINC01108	0.879202
C14orf145	0.59	DNAJC9	0.606147	BRS3	0.878676
FGFBP3	0.59	DHX38	0.605582	PHYHIP	0.877917
R3HDM1	0.59	PGA3	0.605132	HIGD1B	0.874257
CNKSR3	0.59	CPEB2-AS1	0.605065	BATF2	0.873477
AGPAT3	0.59	C1QTNF2	0.604819	RN7SK	0.873425
LEAP2	0.59	CEPT1	0.604521	MIR663A	0.873129
THC2551912	0.59	SLC26A11	0.603984	TCP10	0.870342
KDSR	0.59	SIX1	0.602898	GPR20	0.869966
UBE2Q2	0.59	MLANA	0.602546	ROPN1B	0.869398
C2orf63	0.59	LOC101928517	0.601632	PSEN2	0.869342
BU624523	0.59	LRG1	0.601591	LINC02338	0.868975
UBR3	0.59	S100A9	0.601563	LEAP2	0.867479
SRGN	0.59	ZNF501	0.601469	WDR74	0.866796
THC2543854	0.59	C21orf91-OT1	0.600541	FTH1	0.866558
HERC2P2	0.59	ARMS2	0.600408	TPH1	0.866081
THC2708124	0.59	KRAS	0.600404	RASSF9	0.864042
YTHDC2	0.59	ARX	0.599952	GAST	0.863924
MITF	0.59	ZCCHC2	0.599468	LOC101928775	0.863515
USP6	0.59	MDH1B	0.599358	HK3	0.862779
THC2652700	0.59	ZNF556	0.59832	RNVU1-15	0.8615
ZNF397	0.59	CROCC	0.598268	DBX2	0.860177
FLJ00290	0.59	ART1	0.596285	TNFSF18	0.859903
CTNNB1	0.59	IL22RA1	0.595666	PDZD3	0.859225
NSBP1	0.58	CRYGA	0.594554	MAGEA11	0.859094
FLJ10246	0.58	ZNF214	0.594548	H1FX-AS1	0.858578
THC2525827	0.58	LOC102546299	0.593841	NXPH4	0.857235
SYNJ1	0.58	PRKAG2-AS1	0.593682	LRRC37A2	0.856827
AK002066	0.58	SCNN1G	0.592302	CDCP1	0.856301
TMEM106B	0.58	ZNF624	0.592251	LINC00583	0.854795
DKFZp547G183	0.58	PDE4C	0.592033	LOC100128386	0.854795
CN312045	0.58	LINC01816	0.591906	LINC00552	0.854795
A_24_P922120	0.58	RASSF4	0.591697	LOC100130964	0.854795
KLC1	0.58	GBP2	0.590869	LINC00930	0.854795
THC2688475	0.58	TNF	0.589947	MIR3179-1	0.854795
KIAA0586	0.58	RASAL3	0.589723	LINC00844	0.854795
HIST1H2BK	0.58	DSG2-AS1	0.589553	SOX21-AS1	0.854795
RPS6KA3	0.58	RSPO1	0.588663	LINC00365	0.854795
KIAA1529	0.58	LINC02294	0.588638	HOXC13-AS	0.854795
SMC2	0.58	NUAK2	0.586689	IPO11-LRRC70	0.854795
ANKH	0.58	LRRC66	0.586436	LOC101927657	0.854795
LOC440295	0.58	BORCS7-ASMT	0.586407	LOC101928307	0.854795
VPS41	0.58	NT5C1A	0.586126	LOC101928618	0.854795
BC017350	0.58	LCN2	0.585439	LOC101929528	0.854795
BI771054	0.58	FTH1	0.584797	LINC02200	0.854795
AK057071	0.58	SYNC	0.583001	VAX1	0.854795
ATG5	0.58	BTG4	0.582926	RAB39B	0.854795
NUPL1	0.58	PMAIP1	0.581341	CNTFR	0.854795
A_24_P75888	0.58	C10orf111	0.580757	LELP1	0.854795
AK024184	0.58	RFPL4B	0.580395	USP51	0.854795
C11orf46	0.58	IGFBPL1	0.58031	NR0B1	0.854795
THC2677229	0.58	ALG1L9P	0.580034	S1PR1	0.854795
A_32_P222872	0.58	MYLK4	0.580028	FCN2	0.854795
ZNF439	0.58	POT1-AS1	0.579463	ALPP	0.854795
RAP2B	0.58	LL22NC01-81G9.3	0.579282	LINC02396	0.854795
THC2618720	0.58	C8orf31	0.579204	GPR32	0.854795
CEP350	0.58	GNRH1	0.577742	HBZ	0.854795
FAM116A	0.58	GPM6A	0.577418	APOA2	0.854795
DCUN1D1	0.58	LILRA6	0.577376	KRTAP13-2	0.854795
USP31	0.58	LOC100287728	0.57694	LINC01959	0.854795
GIT2	0.58	BOK-AS1	0.576731	RTP2	0.854795
ARHGAP12	0.58	PLD4	0.575749	LCE1B	0.854795
FLJ13305	0.58	ADAM29	0.575495	AQP2	0.854795
LOC729806	0.58	CAVIN3	0.573525	KRT2	0.854795
BDP1	0.58	AGRP	0.573525	KRT31	0.854795
STK39	0.58	CDRT15L2	0.573525	OR5C1	0.854795
GTF2A1	0.58	LOC339166	0.573525	C1orf220	0.854795
LONRF2	0.58	RXFP4	0.573525	LY6H	0.854795
MT1F	0.58	ALDH6A1	0.573525	H2AFB1	0.854795
BX641009	0.58	PROP1	0.573525	PITX2	0.854795
LIPT1	0.58	SLC37A2	0.57303	PRB3	0.854795
ASXL2	0.58	FGFR1OP	0.57257	PRSS2	0.854795
MLL5	0.57	ATF3	0.571862	PSG6	0.854795
CBWD2	0.57	NUB1	0.571707	MYL7	0.854795
PAN3	0.57	ZNF550	0.571199	DEFB134	0.854795
BX485389	0.57	ERGIC2	0.570851	RPL26	0.854795
GOLGB1	0.57	GPRIN1	0.569271	FAM110C	0.854795
THC2627335	0.57	P2RY6	0.56915	TSPY8	0.854795
RRP15	0.57	BSDC1	0.569128	MIR600HG	0.854795
AL117599	0.57	LYPD3	0.56839	HIST1H2BH	0.854795
STAU2	0.57	BAG3	0.568218	PCBD2	0.854795
RANBP2	0.57	VWC2L	0.568052	PAGE5	0.854795
SMC5	0.57	UTS2B	0.567848	EPHA8	0.852815
ZMYM2	0.57	LINC02044	0.566254	DPEP3	0.850651
LMBRD2	0.57	MOSPD2	0.566219	LINC00708	0.849155
THC2480144	0.57	MRPL39	0.565924	GSTA5	0.849155
WDFY1	0.57	UBQLN2	0.565477	GAGE12C	0.849155
CV570707	0.57	LOC101927692	0.565329	GEM	0.848882
MED28	0.57	KCTD6	0.56529	SCN1B	0.847416
LYSMD3	0.57	OTOG	0.565239	SLC16A3	0.84727
THC2538568	0.57	C3orf52	0.564563	OR10A2	0.846341
HS3ST3B1	0.57	CT47A10	0.564197	NLRP6	0.845986
THC2672869	0.57	HTT-AS	0.563919	LINC01134	0.845368
KIF18A	0.57	BIRC3	0.563833	SLFN14	0.845238
SGK269	0.57	ZNF25	0.563347	GJA1	0.844884
SETD7	0.57	LINC01436	0.563262	LINC01814	0.844684
CIT	0.57	INSL6	0.562749	MIR22HG	0.844426
GIN1	0.57	NXPE1	0.562535	FAM138E	0.843784
ZNF292	0.57	TSGA13	0.562211	C10orf142	0.843784
MAPK8	0.57	CHRNA3	0.561716	KRTAP9-7	0.843784
BC045174	0.57	ZNF503	0.561537	LOC100506159	0.843784
ASH1L	0.57	LOC414300	0.561001	SAMSN1-AS1	0.843784
POLK	0.57	LINC02078	0.560888	LINC01436	0.843784
DOCK7	0.57	LINC01273	0.560712	LINC02411	0.843784
AK057116	0.57	ZNF575	0.560522	LINC01489	0.843784
THC2602429	0.57	LOC283194	0.559677	LINC01700	0.843784
BX109843	0.57	C9orf57	0.559516	LINC02401	0.843784
CASP3	0.57	APELA	0.559458	LOC101929532	0.843784
LBR	0.57	SCN2B	0.559192	MAFA-AS1	0.843784
BC018675	0.57	SBK1	0.558001	CDX1	0.843784
LCP1	0.57	SRPK3	0.557015	LOC105373100	0.843784
EIF4G3	0.57	TMEM59L	0.556871	CERS1	0.843784
VPS13A	0.57	DNTTIP2	0.556333	NXPH3	0.843784
HPGD	0.57	MTMR11	0.555934	OR52K2	0.843784
RFXAP	0.57	LOC105376671	0.55575	OR52W1	0.843784
AK023756	0.57	PRSS56	0.555532	GPHB5	0.843784
KLHDC5	0.57	ZNF354A	0.555458	C22orf39	0.843784
CDC14A	0.57	TGFBR3L	0.555374	LINC01600	0.843784
KLHL3	0.57	LOC102723385	0.555047	C1QL2	0.843784
AK023338	0.57	PKIA	0.55501	DEFA4	0.843784
THC2532114	0.57	ZNF620	0.554725	ZCCHC12	0.843784
USO1	0.57	NDUFB3	0.554538	XAGE3	0.843784
CR603201	0.56	SPATA8-AS1	0.554425	DTX3	0.843784
LPP	0.56	LINC00408	0.554425	VGLL2	0.843784
A_32_P134679	0.56	LOC101928775	0.554425	DKFZP434A062	0.843784
ZNF441	0.56	LINC00375	0.554425	CLEC4E	0.843784
ATP11C	0.56	SIGLEC11	0.554425	GDF2	0.843784
AK057830	0.56	MRGPRX2	0.554425	GPR12	0.843784
KIAA0484	0.56	C2CD4C	0.554425	LINC01114	0.843784
A_23_P251002	0.56	SOWAHA	0.554425	HLA-DQB2	0.843784
PHC3	0.56	GDF10	0.554425	HOXB2	0.843784
METT5D1	0.56	LOC284898	0.554425	LINC01139	0.843784
ZNF131	0.56	SLC39A2	0.554425	FAM41AY1	0.843784
2018-09-13	0.56	KRT6B	0.554425	LRIT2	0.843784
TCTN1	0.56	LALBA	0.554425	OR1J1	0.843784
XIST	0.56	PIGC	0.554425	KIR2DS1	0.843784
AK124263	0.56	VNN3	0.554425	KRTAP5-9	0.843784
ZNF684	0.56	PCDHB16	0.554425	KRT4	0.843784
LAMC1	0.56	POU3F2	0.553951	LCN2	0.843784
NOTCH2NL	0.56	TTPA	0.552966	FOXL2NB	0.843784
AK097322	0.56	CHRNA10	0.552497	MAGEB4	0.843784
ZNF12	0.56	KCNA7	0.552088	LINC01555	0.843784
SDCBP	0.56	TSPAN6	0.550926	GOLGA6L22	0.843784
BE881987	0.56	SLCO6A1	0.550839	SULT1C3	0.843784
MAP3K7IP3	0.56	PTPN22	0.549789	CKLF	0.843784
SDHAP3	0.56	EDN2	0.549408	TRPV6	0.843784
PLA2G4A	0.56	KLF8	0.549316	TEX13B	0.843784
GOLGA5	0.56	CAPN8	0.54925	GKN1	0.843784
C18orf33	0.56	SLC35E2	0.549242	RNF224	0.843784
CCDC76	0.56	P2RX5-TAX1BP3	0.548813	MIR563	0.843784
A_24_P204334	0.56	A3GALT2	0.548792	LOC730668	0.843784
MYLIP	0.56	FRS3	0.548326	OR4F17	0.843784
SPATA2	0.56	SLCO5A1	0.547798	HIST3H3	0.843784
AK024173	0.56	PHOX2A	0.54759	PERM1	0.843784
KIAA1012	0.56	CASC19	0.547409	ZC3H10	0.843784
ALDH5A1	0.56	MED14OS	0.547036	XAGE2	0.843784
PPM1B	0.56	LOC101928231	0.546241	FUZ	0.84374
PHF17	0.56	ECI2	0.545153	KLF1	0.843541
PRTN3	0.56	ARL13B	0.543737	SLC6A4	0.843154
DA240028	0.56	GCA	0.543444	CASC23	0.842739
CXorf39	0.56	RNU5D-1	0.543433	PRORY	0.841131
MPHOSPH1	0.56	ABCA11P	0.543361	TNFSF15	0.840236
WDHD1	0.55	C5orf58	0.54312	GRAP	0.839858
FAM111A	0.55	CA4	0.542122	LINC01519	0.838652
AK091357	0.55	NA	0.541961	GZMM	0.837792
RP4-692D3.1	0.55	CASC9	0.541434	C1orf158	0.837388
THC2646867	0.55	LOC283710	0.541363	LVRN	0.83685
CR591289	0.55	SULT1A2	0.541003	SLC9A4	0.836742
RB1	0.55	RASSF6	0.540897	LEMD1	0.836133
A_32_P142363	0.55	EPYC	0.540318	LOC101927354	0.8357
THC2729899	0.55	OCM2	0.539479	CXADRP3	0.833341
AF264621	0.55	KCNG2	0.539119	TESK1	0.833341
TMCC1	0.55	TMPRSS6	0.538416	CXCL16	0.833327
RASAL2	0.55	TEX26	0.537696	LOC101927811	0.832869
COX1	0.55	CSF1	0.536799	ZFP3	0.830125
RNF145	0.55	CCNT2	0.536643	LINC00900	0.829516
AK093532	0.55	MSANTD3	0.536049	PGLYRP3	0.829351
GIGYF2	0.55	LINC00960	0.535847	ASB4	0.828749
A_24_P384239	0.55	SEM1	0.535828	LINC02232	0.827986
SR140	0.55	ULBP1	0.535408	PNLIPRP1	0.827933
AL080232	0.55	RBFA	0.535055	IDI2-AS1	0.827075
RC3	0.55	RAD9B	0.535043	SLC4A9	0.826245
TBC1D23	0.55	NKAIN4	0.53428	AGRP	0.825698
CREB1	0.55	42797	0.53353	MC5R	0.825698
MAGEB18	0.55	DCLRE1A	0.532928	C1orf185	0.825484
EEA1	0.55	DUSP1	0.532749	MMP28	0.824641
NKIRAS1	0.55	SPATA3-AS1	0.532232	LINC01392	0.824481
THC2537856	0.55	LOC100288966	0.532185	OSGEPL1	0.824142
NPL	0.55	ANKRD49	0.531942	RASD1	0.823252
BX119435	0.55	TMEM136	0.531875	FAM219A	0.822254
PRKRIR	0.55	LINC01876	0.531663	LOC100507205	0.821576
UGP2	0.55	GCM1	0.531621	MIR219A2	0.820365
RSRC1	0.55	MKNK1-AS1	0.530078	TLR4	0.819188
LOC642236	0.55	LINC01150	0.530041	TUBB2A	0.818966
MEIS3P1	0.55	HTR3D	0.5299	GDF15	0.818564
AKAP2	0.55	SERTM1	0.529884	LOC102723661	0.81826
CPEB4	0.55	LINC01299	0.529739	ZFP28	0.816601
THC2647739	0.55	ABCB5	0.529666	LOC105376554	0.816423
THC2525241	0.55	KRBA2	0.52962	COL7A1	0.815461
ZNF295	0.55	USHBP1	0.529611	LINC00645	0.814038
BX104057	0.55	FBXO8	0.52865	FAM83C	0.814038
EXOC3L2	0.55	EME1	0.528387	SPATA8-AS1	0.812672
ARRDC4	0.55	MCM3AP	0.528207	LOC102467222	0.809863
CR625571	0.55	NUTM2F	0.526659	LOC100131635	0.809665
EIF5	0.55	MAEL	0.526265	PNPLA4	0.809477
LOC492311	0.55	GADD45A	0.526185	KRT12	0.808609
NFE2L2	0.55	RAB40A	0.525766	TUBAL3	0.806039
MDM2	0.55	SIGLEC6	0.525657	REM2	0.805712
HIST1H3F	0.55	SERPINA3	0.525401	ACTN1-AS1	0.805533
NKAP	0.55	PSMC1	0.524796	NLRP7	0.804714
THC2655026	0.55	DMTF1	0.523981	GADD45A	0.804644
SYNJ2BP	0.55	ARSH	0.523437	MMP3	0.803948
A_24_P88493	0.55	LINC00266-1	0.523341	DCDC2B	0.803891
MOSPD1	0.55	PCDH8	0.523022	MS4A18	0.803592
THC2768767	0.55	HSPA1B	0.522257	LMNTD2	0.802314
ENST00000339968	0.55	MAP3K8	0.521823	SERPINA1	0.801524
ZNF518A	0.55	ZBP1	0.521574	LOC100129203	0.80064
DHRS2	0.55	JPH4	0.521217	SBK3	0.80064
SPEN	0.54	KRR1	0.519549	CCAT1	0.80064
VPS13B	0.54	NPEPL1	0.51952	MIR548AL	0.80064
AK092378	0.54	LOXL3	0.518449	MIR4470	0.80064
A_32_P162322	0.54	FHIT	0.51844	TBC1D3G	0.80064
THC2496620	0.54	MELK	0.517502	LOC101927318	0.80064
LOC441768	0.54	KLHL15	0.517128	LOC101927358	0.80064
CBWD6	0.54	LOC101928307	0.516887	LINC01227	0.80064
ENST00000369381	0.54	C14orf178	0.51622	LOC101928401	0.80064
PPP1R12A	0.54	CD28	0.515164	LINC02119	0.80064
A_24_P717305	0.54	ABHD4	0.515016	MPZL2	0.80064
FBXW7	0.54	ZPBP	0.514957	LINC00363	0.80064
THC2668629	0.54	C8orf88	0.514804	LINC01177	0.80064
ZNF714	0.54	FGG	0.513904	LHX5-AS1	0.80064
AK054879	0.54	LRP12	0.51364	C1QTNF5	0.80064
A_24_P932141	0.54	MCAM	0.513622	SPATA25	0.80064
NIPBL	0.54	PTGES2-AS1	0.512256	MIR1-1HG	0.80064
CX783461	0.54	NFIL3	0.51225	PTGR2	0.80064
A_24_P123720	0.54	AKR1C4	0.512153	C7orf66	0.80064
AK057652	0.54	MAGI2-AS3	0.511976	ZNF497	0.80064
THC2640304	0.54	MS4A15	0.511928	FGA	0.80064
A_24_P919044	0.54	ZNF563	0.510705	FOXS1	0.80064
ZNF442	0.54	LINC00513	0.510332	CALHM1	0.80064
BC006271	0.54	RNASEL	0.510101	TEKT2	0.80064
ZNF23	0.54	TEDDM1	0.510008	LINC00567	0.80064
CR603951	0.54	IRF5	0.509958	LINC00319	0.80064
ZNF493	0.54	ALG10B	0.50967	C3orf56	0.80064
GOLGA1	0.54	UBR5-AS1	0.509387	LINC02159	0.80064
LOC339843	0.54	MIR3916	0.509109	LINC01622	0.80064
A_24_P919168	0.54	LACTB	0.50821	CXCL1	0.80064
AFF1	0.54	LHFPL3-AS2	0.508171	HTR1D	0.80064
THC2610890	0.54	LINC01047	0.507726	APOA4	0.80064
THC2746807	0.54	GS1-594A7.3	0.50649	CYR61	0.80064
ENST00000340249	0.54	NOP9	0.505839	FOXD4L4	0.80064
A_32_P184039	0.54	TEX19	0.505835	RBMY1B	0.80064
SHOX2	0.54	INSC	0.50574	KIR2DS4	0.80064
TMTC3	0.54	ISCU	0.505424	OR5M9	0.80064
THC2557762	0.54	LINC00645	0.505165	DEFB132	0.80064
DHFRL1	0.54	SELENON	0.505142	MIR101-1	0.80064
SUZ12P	0.54	PINK1-AS	0.504659	FAM26F	0.80064
CAPS2	0.54	LHFPL1	0.504636	MIR373	0.80064
ENST00000260045	0.54	SEPT4-AS1	0.504427	NPPC	0.80064
LOC90826	0.54	MMP20	0.504401	CRNN	0.80064
USP24	0.54	DSCR9	0.504031	RAB9B	0.80064
LOC100134228	0.54	FZD6	0.504012	SLC22A17	0.80064
ATRN	0.54	TSPAN10	0.503959	TUT1	0.80064
FBXO4	0.54	FKTN	0.503642	SNAI2	0.80064
AK123649	0.54	NCR3	0.503498	SPRR2G	0.80064
SEMA4D	0.54	PKHD1	0.502237	XCL2	0.80064
C2orf34	0.54	MLLT3	0.501675	GOLGA6L6	0.80064
THC2674900	0.54	ALPI	0.501614	ZNF80	0.80064
USP28	0.54	ZNF136	0.501196	LILRA6	0.80064
ZNF789	0.54	AP3B2	0.501051	APOLD1	0.80064
LRP12	0.54	PLA2G2C	0.500164	MXD3	0.80064
SHPRH	0.54	LOC145845	0.499622	INSM2	0.80064
FLJ40113	0.53	LINC01019	0.499457	AJUBA	0.80064
A_24_P136155	0.53	LOC101927070	0.499399	AKAP4	0.80064
A_24_P16291	0.53	MYLPF	0.499264	LINC01621	0.80064
ECHDC1	0.53	CCDC151	0.499154	HAND1	0.80064
THC2683270	0.53	CETN1	0.498275	SMAD5-AS1	0.80064
GNL1	0.53	UBE2D4	0.497283	C5orf38	0.800405
THC2639487	0.53	LOC403323	0.496702	CTXN3	0.800405
DIAPH3	0.53	SUSD5	0.496564	CD3E	0.800405
THC2499058	0.53	LINC00410	0.496519	FAM71F2	0.800061
NPAT	0.53	KPNA7	0.496067	LYPD1	0.79932
THC2673084	0.53	CXCL1	0.495918	TMEM198	0.798847
DNAJC10	0.53	TEX36	0.495588	LINC01015	0.797216
THC2685096	0.53	ADGRA1	0.495525	ATP1B4	0.797216
TARP	0.53	LINC00238	0.4955	LOC284898	0.797216
CRYGS	0.53	ZBTB32	0.495481	VSX1	0.797216
ZNF254	0.53	ZNF485	0.495325	TMEM211	0.795802
BRIP1	0.53	CCDC13	0.495317	GCLM	0.794605
ATXN3	0.53	CHRNA1	0.495287	VSTM4	0.793628
THC2762599	0.53	PPP1R3B	0.495174	ARL17B	0.791662
THC2730719	0.53	BMP8B	0.494624	DNAJB13	0.790244
AI525856	0.53	MEIOC	0.494427	MAFB	0.790243
RUFY2	0.53	PDZD4	0.494108	LOC101927666	0.789959
ZCCHC10	0.53	SHPRH	0.494067	POM121L2	0.789959
A_32_P177937	0.53	PSORS1C1	0.493969	NHLH2	0.78912
ADAM22	0.53	PLA2G2F	0.493888	RNF139-AS1	0.788176
AFF4	0.53	ZNF680	0.493537	GFAP	0.786844
NEDD4L	0.53	LINC01539	0.491985	C1orf100	0.785956
TAF2	0.53	THEMIS2	0.491451	LAMB2	0.785897
KIAA1377	0.53	RBM41	0.491307	DSG3	0.785802
RNF2	0.53	WNT10B	0.490804	TBX18	0.784793
C5orf35	0.53	LINC01554	0.49048	BTBD17	0.784628
THC2655194	0.53	LOC101926942	0.490155	PKP3	0.784459
BX089701	0.53	ADRA2C	0.489872	LINC00412	0.783664
T05215	0.53	LINC01118	0.489759	TMEM184A	0.782459
A_32_P128097	0.53	LINC00687	0.489432	PAX8	0.782103
FAM18B	0.53	ESAM	0.48904	KLHL34	0.781947
BC030138	0.53	HHIPL1	0.488983	WISP3	0.781298
THC2659414	0.53	ANKRD20A1	0.488912	LINC01424	0.780717
CR620977	0.53	APOD	0.488775	ZNF561-AS1	0.780419
AK057167	0.53	GOLGA6L4	0.488729	PLA2G12B	0.779495
AKAP11	0.53	ME1	0.488674	SULT1C2	0.777318
GLT8D3	0.53	SMA4	0.488039	FIP1L1	0.777143
AI024778	0.53	PFDN1	0.488029	PRICKLE4	0.777052
USP15	0.53	PRELP	0.487339	PIANP	0.77669
SYAP1	0.53	GACAT3	0.48724	UFSP1	0.775904
C7orf28B	0.53	LRRC37A2	0.487168	DNAI2	0.775411
FAM8A1	0.53	EPC1	0.487069	LINC00974	0.774339
Z69892	0.53	PTGS2	0.486484	RLN1	0.774339
DENND4A	0.53	TAF6	0.485891	TGM2	0.773771
SLC25A13	0.53	GPM6B	0.485428	FBXW10	0.773681
THC2645960	0.53	NLRP1	0.484092	LOC101927120	0.772897
2018-09-14	0.53	CA3-AS1	0.484078	DLG5-AS1	0.772516
NARG1	0.53	DICER1-AS1	0.483632	UXT-AS1	0.772516
FLJ11171	0.53	FAM162B	0.482879	MIR4717	0.772516
THC2701372	0.53	TAPBPL	0.482734	LINC01587	0.772516
ABCA5	0.53	PPP1R15B	0.482437	MIR6511A1	0.772516
KIAA1467	0.53	CEP295	0.482397	LINC02293	0.772516
P2RY1	0.52	ZNF135	0.482182	LINC01419	0.772516
STRBP	0.52	FAM41C	0.482165	FOXC2-AS1	0.772516
ZNF700	0.52	NUP153	0.481936	LOC105375744	0.772516
PKD2	0.52	FRMD4B	0.481542	FZD10	0.772516
MAPKAPK5	0.52	LINC00608	0.48136	OR52M1	0.772516
FGFR1OP	0.52	NIPSNAP1	0.481151	CST9	0.772516
COPS2	0.52	IRAK2	0.481094	KLF14	0.772516
NEDD1	0.52	ZBED3	0.480326	CSF2	0.772516
CCDC25	0.52	COL9A3	0.478555	FAM71A	0.772516
ENST00000341591	0.52	CXCL14	0.478526	TVP23C	0.772516
CHD1	0.52	ZDBF2	0.478478	GCSAM	0.772516
FAM82A	0.52	USP35	0.477782	GBX2	0.772516
MTIF3	0.52	SPSB4	0.477583	VN1R2	0.772516
DDHD1	0.52	LEAP2	0.477472	S100A7A	0.772516
NCKAP1	0.52	COL6A1	0.477378	IFNA6	0.772516
SPG20	0.52	KRT24	0.477378	IVL	0.772516
MYSM1	0.52	POLG	0.475811	KRT6B	0.772516
SMG1	0.52	MTERF3	0.475684	OR4D10	0.772516
AK023412	0.52	RBM43	0.475577	SERPINA2	0.772516
CLOCK	0.52	FRRS1L	0.47553	KRTAP5-5	0.772516
LRRCC1	0.52	MYSM1	0.475448	NEDD8	0.772516
CR627373	0.52	EPHA8	0.475204	SPANXN1	0.772516
BM922553	0.52	ERICH4	0.475124	PRKACG	0.772516
BC000228	0.52	EDNRB-AS1	0.475124	AMIGO1	0.772516
RAPGEF6	0.52	LINC00943	0.475124	TMEM229A	0.772516
C21orf96	0.52	TRIM43	0.475124	UGT2B10	0.772516
THC2701686	0.52	C12orf74	0.475124	OR5H2	0.772516
KIAA0947	0.52	KRTAP5-9	0.475124	SCGB3A1	0.772516
PRPF39	0.52	ZNF852	0.475058	MAGEC1	0.772516
RTCD1	0.52	VSTM5	0.474701	GRID1-AS1	0.772462
CCNA1	0.52	SPICE1	0.474605	HBM	0.771597
WDR7	0.52	ZNF615	0.474439	IDO1	0.771575
C7orf28A	0.52	SLC12A1	0.474311	PRR5	0.770437
OSBPL3	0.52	EIF3CL	0.474171	IL21R	0.768661
AK092349	0.52	WNT4	0.474062	JPH4	0.768038
CCDC34	0.52	LINC01337	0.473953	LINC01484	0.76654
SMCHD1	0.52	HPN-AS1	0.47366	LINC02167	0.766529
IKZF5	0.52	GBP5	0.473653	LENG9	0.766132
LOC728705	0.52	CARD16	0.473266	CCDC80	0.765931
CEP192	0.52	CPA3	0.472924	LOC101928887	0.765699
SLCO4C1	0.52	AICDA	0.47292	NRIP2	0.765317
RAB5A	0.52	TINCR	0.472661	ZNF841	0.764089
ATAD2B	0.52	RAD23A	0.472229	CCL22	0.763483
ENST00000398707	0.52	RRS1	0.472187	HLA-DQA1	0.763361
RP6-213H19.1	0.52	MRPS22	0.471579	ITGA3	0.762506
FZD6	0.52	DAND5	0.471548	MATN1	0.761874
TBCEL	0.52	RNF139-AS1	0.471189	GRPEL2	0.761101
RSF1	0.52	SLC10A6	0.471164	MYBPC2	0.760968
ENST00000356486	0.52	LOC101929719	0.471073	LINC00303	0.760801
BU567566	0.52	SELENOK	0.470748	MET	0.760165
CLEC2D	0.52	ADAMTS7	0.470706	CFL1	0.759933
PCM1	0.52	LINC01581	0.470685	CCND2-AS1	0.759882
BX097190	0.52	ZNF24	0.469966	PCAT2	0.759556
MGC10814	0.52	KIAA0907	0.469683	F2RL1	0.759004
DNAJC21	0.52	CCDC169-SOHLH2	0.469496	MEFV	0.757409
BM999343	0.52	TTLL13P	0.469369	OPN5	0.757259
SCOC	0.52	ICE1	0.46906	MIR194-2HG	0.756518
ZNF626	0.52	RLBP1	0.468121	NDNF	0.755616
FAM92A3	0.52	CABYR	0.467968	PRSS37	0.755341
ASAH1	0.52	DDX54	0.46795	LINC01909	0.754809
LOC595101	0.51	LOC284412	0.467493	OSER1-AS1	0.754651
STXBP3	0.51	LINC00485	0.467159	LINC00092	0.753568
THC2645797	0.51	DNAH2	0.467094	LOC101929117	0.753568
NBR1	0.51	OPN1MW2	0.466844	DUOXA1	0.753568
XRRA1	0.51	CAPN14	0.466469	IPO9-AS1	0.753007
A_24_P915675	0.51	DHRS12	0.466452	HHAT	0.751138
FLJ10213	0.51	GLYAT	0.466026	SHISA4	0.749883
LTV1	0.51	TEX43	0.466011	CYP4F2	0.749078
PAPOLA	0.51	ITGA3	0.465884	SPACA6P-AS	0.748848
PTPRR	0.51	PODNL1	0.465699	CSN1S2BP	0.748586
RNU12	0.51	KAT6B	0.465675	DEFB123	0.747817
LOC642826	0.51	APOBEC3C	0.465641	C10orf111	0.747363
CD200R1	0.51	LST1	0.465621	LINC00840	0.747305
TRPM7	0.51	SLC26A4-AS1	0.465345	RDH10	0.746526
AI911989	0.51	FAS	0.464945	POSTN	0.746464
U92025	0.51	FAM174A	0.464925	TLR8	0.746422
AK096056	0.51	GREM1	0.464599	GS1-24F4.2	0.746165
A_24_P813730	0.51	RADIL	0.464599	MATN3	0.743272
AF086032	0.51	SCG2	0.464357	SCRT2	0.742633
TFPI2	0.51	C14orf105	0.463626	RIMBP3	0.742084
UBE2CBP	0.51	TG	0.46359	ZDHHC19	0.741109
C8orf38	0.51	CENPQ	0.463577	LINC01676	0.74109
SLC30A7	0.51	IBA57-AS1	0.463225	LINC00550	0.740917
SMA4	0.51	C8orf82	0.463212	EEF1AKMT2	0.740917
BC031274	0.51	RTFDC1	0.463196	PCK1	0.740917
ASRGL1	0.51	IGFL2-AS1	0.463031	LINC01727	0.740627
THC2652887	0.51	HIST1H2BA	0.462755	TCTEX1D1	0.740556
BC020539	0.51	P4HA3	0.462745	AKR1C4	0.740284
ZFP1	0.51	UMODL1	0.462638	LINC00102	0.740103
ENST00000391341	0.51	ZNF181	0.462417	LINC02213	0.739283
D70835	0.51	LVRN	0.462332	LINC01648	0.736965
SLMAP	0.51	ADNP-AS1	0.462331	LINC01282	0.736897
PDGFC	0.51	NIFK	0.461642	INSM1	0.736309
ENST00000201023	0.51	CCDC148	0.461536	GJB1	0.736158
NETO2	0.51	GJC3	0.461248	BORCS7-ASMT	0.735315
2009-06-30	0.51	CACNA1S	0.460305	RFPL2	0.735036
THC2484329	0.51	CCDC174	0.460102	CCL4	0.734433
LOC653071	0.51	LINC02372	0.459967	SLAMF8	0.733067
SEC23A	0.51	CERS3-AS1	0.459501	CYP3A4	0.732437
CLIP1	0.51	PROX2	0.459076	LINC01023	0.732084
RBM27	0.51	ATAD1	0.458671	NPAS4	0.731633
GTF2E2	0.51	ZNF780B	0.458575	LOC101927827	0.731067
PDLIM5	0.51	PPIB	0.458458	LOC101927131	0.730844
ACAT1	0.51	CAVIN4	0.458321	PRDM1	0.730017
LRRFIP2	0.51	NGF	0.458259	FAM163B	0.729409
ZNF737	0.51	KBTBD2	0.455695	DEFB108B	0.728513
TMEM135	0.51	CDC37L1	0.454962	CASC22	0.728196
ABCD3	0.51	ZNF534	0.454886	CCDC172	0.727659
HEL308	0.51	N4BP2L1	0.454044	LILRA5	0.727281
ZDHHC20	0.51	PIAS4	0.453691	AOC2	0.726613
CCDC75	0.51	REST	0.452973	CLCNKA	0.726503
SEC61A2	0.51	ZNF853	0.452712	GPC1	0.725034
NAT13	0.51	C2orf81	0.452495	RIT1	0.72484
ZBTB1	0.51	TRIL	0.452384	NKX2-4	0.722679
AL832142	0.51	HSD17B12	0.452068	SELENBP1	0.7226
BG527520	0.51	NFE2L2	0.45188	C1orf137	0.722561
TSPAN6	0.51	OAZ3	0.451439	ZFPM2-AS1	0.722322
PJA2	0.51	SMC3	0.451428	FGF10-AS1	0.721802
ALS2CR4	0.51	EIF3A	0.451412	IL1B	0.721695
KRR1	0.51	PEX11A	0.450689	ZNF418	0.721408
THC2502237	0.51	LOC101929718	0.45059	LINC00158	0.72134
ENST00000327026	0.51	MMRN2	0.450388	CARMN	0.721213
KIAA1586	0.51	ETFRF1	0.449077	CSRP2	0.720838
TFEC	0.51	RAP2A	0.448571	KLK4	0.720705
IPO7	0.51	RABGGTB	0.448302	EGFR	0.719575
CEP55	0.51	CLINT1	0.448271	SDR39U1	0.718917
THC2688000	0.51	HRAT17	0.448136	IGF2	0.718786
DCLRE1C	0.51	ZNF92	0.447902	SLC25A41	0.718566
FGFR1OP2	0.51	TRPC7	0.447554	KCNK3	0.718066
KIF15	0.51	LINC01220	0.447526	CPEB2-AS1	0.717778
ANKRD10	0.51	ATP1A1-AS1	0.447522	EFCAB12	0.716349
ZNF675	0.51	FAM221A	0.447344	GS1-600G8.3	0.716072
KIF11	0.51	TPR	0.4472	FAM83A	0.715934
VEZT	0.5	HEXIM1	0.446645	LINC01973	0.715354
A_32_P141938	0.5	TDRG1	0.446484	APOBEC1	0.714569
FUSIP1	0.5	LOC105377763	0.446181	GNRH1	0.714262
OXTR	0.5	SLC25A47	0.446035	LOC646626	0.713388
POLQ	0.5	SFRP1	0.445964	PLK2	0.713198
ZNF430	0.5	EIF1AD	0.444792	COL24A1	0.712904
BC031977	0.5	LZTS2	0.444769	ZNF728	0.712309
ZNF761	0.5	MON1B	0.444714	LOC100134391	0.711954
LOC730291	0.5	HLX	0.444308	LINC02289	0.71017
BX641014	0.5	PROCR	0.444083	ADIRF	0.709827
SECISBP2	0.5	RGPD8	0.443167	TDO2	0.709805
PDPR	0.5	VWA7	0.442983	SPRR2D	0.709299
SPRED1	0.5	CRTC3	0.442909	ZNF420	0.709182
DENND1B	0.5	IFT20	0.442862	CCDC144B	0.708872
ENTPD4	0.5	LINC01877	0.442637	CLEC2B	0.707758
QSER1	0.5	RASL12	0.442515	LOC101927523	0.707417
RBM5	0.5	IKZF5	0.442165	LOC101929719	0.706262
TMEM50A	0.5	GLP2R	0.44212	PODNL1	0.704648
WBP5	0.5	TVP23B	0.441794	ACOT6	0.704613
SFRS11	0.5	C21orf62	0.441523	BARX2	0.704482
SMAD9	0.5	ZNF12	0.441301	TBC1D3P2	0.704467
HSPBAP1	0.5	TWF2	0.44122	CALHM3	0.70431
ZRF1	0.5	PRPF4B	0.441074	SH3BP5-AS1	0.704307
ZNF702	0.5	PPCS	0.44107	PLGLB2	0.704238
THC2551477	0.5	WBSCR28	0.441043	DMRT2	0.703553
TMEM133	0.5	C9orf43	0.440764	B3GALT4	0.703011
CPD	0.5	ATP2B2	0.440523	FABP2	0.702761
THC2664742	0.5	LINC01032	0.440167	FAM166B	0.702761
MTMR2	0.5	RHOB	0.439919	HR	0.702079
ATP6V1C1	0.5	PLIN4	0.439877	HBB	0.701734
SAP30	0.5	BCAR4	0.4394	SCGB1D2	0.701431
WWP1	0.5	VENTXP1	0.439089	ADCY6	0.701041
MORC3	0.5	GEM	0.439089	CYP1B1	0.700306
PLAG1	0.5	BARX1	0.439089	ATP4B	0.699915
MYO9A	0.5	GABRQ	0.438504	FXYD7	0.699636
YES1	0.5	SLC44A1	0.437804	PRSS8	0.699177
TARDBP	0.5	TRMT13	0.437502	SPATA18	0.698952
LRRC58	0.5	GOLGA8M	0.437406	MIP	0.698755
KIAA1429	0.5	UPB1	0.437382	LOC101929006	0.698525
DDEF1IT1	0.5	GHSR	0.436876	GAL3ST1	0.698408
PTGS2	0.5	DNAJC9-AS1	0.436598	B3GALNT1	0.698377
OPHN1	0.5	TRPM7	0.436556	CNN3	0.697611
SNX25	0.5	LINC01665	0.436397	SLC25A25-AS1	0.697271
METTL8	0.5	LEP	0.436272	LINC00940	0.697152
THC2577186	0.5	ZNF23	0.436141	TMEM145	0.69658
TLK1	0.5	PHOSPHO1	0.435812	ZNF513	0.696563
LYG1	0.5	PPM1J	0.435812	CT45A1	0.696127
AADACL1	0.5	MED31	0.435808	BHMG1	0.694759
ERCC4	0.5	PRDM1	0.435723	GSTT2	0.694022
FLJ11710	0.5	ATE1-AS1	0.435626	ULBP2	0.693819
LCA5	0.5	LOC284798	0.43547	MIR320D1	0.693278
C1orf9	0.5	ZFP14	0.435224	HAPLN4	0.692789
HRSP12	0.5	PLPPR4	0.434856	ASPG	0.691965
CDC37L1	0.5	LOC101927237	0.434527	CHST13	0.691811
ITCH	0.5	KLHDC7A	0.434214	LINC00854	0.69156
BX460543	0.5	TSTD2	0.434167	LINC01222	0.69093
AK021554	0.5	CCDC47	0.434134	NRIR	0.690767
ZNF331	0.5	TRIM61	0.433842	LINC01203	0.690543
QRSL1	0.5	SLC5A8	0.433646	SARM1	0.689853
MGC26356	0.5	DHRS7C	0.433631	PHC1	0.689841
THC2669975	0.5	FBXO45	0.433335	CPSF4L	0.68948
RPL32P3	0.5	SAMD9	0.432928	MYBPHL	0.689376
THC2657938	0.5	TTTY10	0.432883	MSC-AS1	0.689312
CIR	0.5	LIN54	0.432844	LINC01799	0.689038
LOC286272	0.5	BMT2	0.432324	ZNF843	0.689006
CAPZA2	0.5	MALAT1	0.432224	TBC1D3E	0.688612
FBXO30	0.5	VANGL2	0.43195	PRAME	0.688496
EVI5	0.5	EOMES	0.431407	PHYHIPL	0.688332
KIAA0802	0.5	STARD9	0.431361	S100A2	0.687589
HNRNPA3	0.49	EP300	0.431302	KLK6	0.687322
DPH4	0.49	SMAD7	0.431242	BPIFB4	0.687181
AKT3	0.49	LINC01340	0.431165	HGD	0.686337
ADAM30	0.49	ZFC3H1	0.431089	LINC02044	0.684273
TANC1	0.49	MCOLN2	0.430979	TEX14	0.684145
ZNF138	0.49	TDRD6	0.430875	LOC102724467	0.683342
MGC42105	0.49	FABP5	0.430783	LYPD5	0.683209
C10orf110	0.49	PRDM2	0.430744	GPR83	0.682969
AL833005	0.49	FAM238C	0.430726	RBM44	0.682608
AK126329	0.49	MYOZ2	0.430673	KLRG2	0.681967
ENST00000355232	0.49	PRKXP1	0.430184	MYLPF	0.681694
ENST00000334564	0.49	PTOV1-AS1	0.430174	ACP6	0.680073
MYH10	0.49	FRMD1	0.430072	TEX19	0.67999
GFM1	0.49	TXK	0.430028	PROM2	0.679863
A_24_P492885	0.49	FOLR3	0.43	LINC02328	0.679806
BX113895	0.49	B3GALNT1	0.429796	LOXL1	0.679181
THC2740111	0.49	RRN3P3	0.429785	LINC01355	0.679079
BNIP2	0.49	MMP11	0.429694	CISTR	0.678728
THC2687053	0.49	ARMC12	0.429603	LINC00316	0.678728
LRP6	0.49	RAD21	0.429386	MYADML2	0.678288
CCAR1	0.49	SMC5-AS1	0.429378	CTSV	0.678195
CENPE	0.49	ZNF300	0.429262	APOBEC3H	0.677166
AK127081	0.49	RWDD3	0.429076	ROS1	0.675885
XR_015453	0.49	CRABP1	0.428613	TBC1D3H	0.67579
U68494	0.49	GNPTG	0.428577	LOC101930114	0.675194
BC036424	0.49	LRIF1	0.428514	GRAPL	0.675019
BC035247	0.49	TOB1	0.428501	LMO7DN	0.67485
GALNT10	0.49	PAIP2	0.428148	CTSK	0.674319
SASS6	0.49	NR2F1	0.428058	KITLG	0.674311
CR610404	0.49	PCMTD1	0.427864	PAOX	0.673674
A_32_P599	0.49	GNL2	0.427724	NHLH1	0.673046
A_24_P814444	0.49	PLEKHD1	0.427568	LINC00494	0.67263
ZNF28	0.49	LOC101928504	0.427429	PRSS38	0.672448
CREBL2	0.49	FBXO38	0.42738	TBX20	0.672388
PLOD2	0.49	BIN1	0.427037	ADPGK-AS1	0.67167
LOC100131479	0.49	ZBTB10	0.427028	TSC22D1-AS1	0.671497
ZNF545	0.49	SLC35D1	0.42694	EEPD1	0.671459
AW451533	0.49	COX20	0.426853	WEE2-AS1	0.671393
FNDC3B	0.49	GPATCH11	0.425858	SAMD15	0.671349
KRTCAP3	0.49	C1R	0.425782	DRICH1	0.670792
PPP2R5C	0.49	LINC00858	0.425528	CXorf66	0.67077
VAMP7	0.49	NXNL2	0.424975	MATN1-AS1	0.670442
THC2709260	0.49	RNPC3	0.424825	LINC01391	0.670283
ZNF322A	0.49	CCL26	0.424549	LINC01560	0.669468
C4orf18	0.49	C1orf168	0.423877	TMEM52B	0.669323
ORAI1	0.49	RPL36A-HNRNPH2	0.423595	PTGER2	0.668959
KIF14	0.49	ZNF839	0.423551	TMEM171	0.667823
BC014938	0.49	SPTY2D1	0.423336	LINC01634	0.667059
SENP6	0.49	SERPINB5	0.422811	DNASE1L1	0.666692
PUM2	0.49	RNY4	0.422573	MYL2	0.665219
MBNL1	0.49	ZC3H13	0.422491	LINC01256	0.664624
A_24_P25040	0.49	LOC285043	0.422211	PLEKHB1	0.663829
GALNT11	0.49	PRKAB2	0.422091	MIR4725	0.663561
DNAJC12	0.49	LGALS9	0.421836	LOC145694	0.662677
TBPL1	0.49	BPIFA2	0.421637	LINC01858	0.661926
FBXO10	0.49	CHGB	0.421563	RIIAD1	0.661894
C14orf106	0.49	LOC389831	0.421383	LOH12CR2	0.661483
THC2634957	0.49	CHD2	0.421198	MIR34AHG	0.661359
AK021848	0.49	LRP8	0.421057	MRGPRX3	0.660286
RNFT1	0.49	PARP10	0.420862	RNVU1-14	0.660284
NF2	0.49	VWA2	0.420737	GIP	0.660154
WWC2	0.49	ILDR2	0.420311	LOC100268168	0.659504
THC2507829	0.48	CFL1	0.420005	PRPH2	0.659461
PLCL1	0.48	RPS7	0.419988	ZNF71	0.658623
THC2706736	0.48	TAF11	0.419895	BORCS8-MEF2B	0.658496
RNF219	0.48	FAM102A	0.418764	VASH1-AS1	0.657363
NHLRC3	0.48	LOC105372582	0.418486	VWA8-AS1	0.656612
THC2783730	0.48	FGD3	0.418346	TNK1	0.655978
GGT6	0.48	FLJ40288	0.418167	CDKN1A	0.655759
ZNF577	0.48	PTGDR2	0.418147	COL8A1	0.655585
ESCO2	0.48	PYROXD1	0.417954	LINC00167	0.65554
THC2651036	0.48	ANKRD11	0.417878	LINC00160	0.654662
UQCRB	0.48	CNTF	0.417875	ITGA2B	0.654627
GLMN	0.48	FOLH1	0.417314	ACPT	0.653788
BI497361	0.48	DDX1	0.41693	MIR3142HG	0.653582
GZF1	0.48	BRF2	0.416447	EGR2	0.653136
CCNT2	0.48	ALS2CR12	0.416404	LINC00640	0.652805
FLJ14327	0.48	FBP1	0.416327	SDC1	0.652138
BX111761	0.48	MRLN	0.416265	C14orf28	0.652076
BC008091	0.48	HJURP	0.415822	LINC01759	0.651608
ZMAT3	0.48	SPTBN4	0.415713	GJB6	0.651289
PPP1R12B	0.48	MORC2	0.415363	ADIPOQ	0.650781
SEC23IP	0.48	GNL3	0.415261	LINC00608	0.650504
ZNF302	0.48	SLC22A1	0.414832	RAMP2-AS1	0.649888
DB527271	0.48	CABP5	0.414616	KIFC2	0.649887
SMARCA5	0.48	ESF1	0.414409	BEX5	0.649659
C5orf34	0.48	MEOX2-AS1	0.414409	IQCA1L	0.649499
BMP2K	0.48	ITGA2	0.414235	LOC100506100	0.649277
ZNF85	0.48	TTC1	0.414205	RHAG	0.648855
ANKRD13C	0.48	CIB3	0.413587	TRAPPC1	0.648392
EPAS1	0.48	ALLC	0.413568	NECTIN4	0.64815
LOC220729	0.48	ZNF572	0.413424	NPIPB9	0.647958
BTBD1	0.48	NEK11	0.413134	NAPA-AS1	0.647161
A_24_P695669	0.48	C7orf61	0.412764	LIMS3	0.646317
NSF	0.48	GFY	0.412689	GP9	0.6462
BE735175	0.48	VCX3A	0.412	ZNF853	0.644725
CPEB3	0.48	KIF4B	0.411994	CRIM1	0.644615
NDUFA6	0.48	EFNB1	0.411898	MORC4	0.643957
SLITRK2	0.48	WDR6	0.411552	LINC02218	0.642901
BC022398	0.48	B3GNT6	0.41139	LINC00665	0.642116
BRCC3	0.48	BARX2	0.41094	RNU5B-1	0.64033
NOL8	0.48	NOL7	0.410755	LAYN	0.638577
FXR1	0.48	OR7D2	0.410714	DCST2	0.637997
DAAM1	0.48	DNAJC7	0.410682	GSTT2B	0.637793
THC2623234	0.48	SLC24A4	0.4102	UCHL1	0.636504
CBFB	0.48	CCL24	0.41015	ADCY4	0.636493
ATP2C1	0.48	NOM1	0.409784	HHLA1	0.636352
THC2686813	0.48	OTX1	0.409224	NEAT1	0.635846
ENST00000391372	0.48	LINC01081	0.408994	LRRC29	0.63529
AK123940	0.48	MSS51	0.4089	LINC01432	0.635221
AGPAT5	0.48	BAAT	0.408875	GOLGA8S	0.635221
MFAP3L	0.48	BAZ2A	0.408686	GABRQ	0.634848
BU507302	0.48	DMRTC2	0.408647	FMO2	0.633684
MAP4K5	0.48	MYBBP1A	0.408584	EPHA2	0.63253
BX641027	0.48	PAGE4	0.408553	STK19	0.632516
ATF2	0.48	BAZ1B	0.408493	SNX22	0.632429
MRE11A	0.48	CXorf38	0.408435	ZNF334	0.63218
CAPRIN2	0.48	OPN3	0.408329	UPK1A	0.631931
FAM44A	0.48	SLC12A3	0.408143	IFIT5	0.631392
DIAPH1	0.48	RNF214	0.408044	ELFN2	0.631033
KIAA1712	0.48	NTS	0.407804	SLC48A1	0.63054
THC2595309	0.48	C5orf47	0.40731	PQLC2L	0.629649
ENST00000361567	0.48	ZNF746	0.407224	LOC100505817	0.628899
GKAP1	0.48	ACPT	0.40696	IL23R	0.628694
BLZF1	0.48	BOD1L1	0.406915	STUM	0.628658
PIGN	0.48	ZWILCH	0.406848	OSMR-AS1	0.628603
ENST00000290943	0.48	KLHL28	0.406721	HRC	0.628346
CR610181	0.48	LOC101927305	0.406366	SLC34A2	0.627402
LRRFIP1	0.48	DEFB119	0.405725	RUNDC3A-AS1	0.627108
THC2571287	0.48	PTPDC1	0.405267	LOC100130992	0.625727
U2AF1	0.48	WHAMM	0.404723	ZNF530	0.624814
THC2645298	0.48	UPF2	0.404585	LINC02108	0.624449
LOC440345	0.47	DUOX2	0.404236	AMBP	0.624356
SFRS4	0.47	THOC3	0.403924	LINC01431	0.6239
LINS1	0.47	MTRNR2L8	0.403913	SLC4A3	0.623658
C10orf118	0.47	MYBPC3	0.403625	LOC105374428	0.623127
A_32_P179646	0.47	SEPSECS	0.403509	FBXO17	0.622989
NBPF3	0.47	TOP3A	0.403298	CA6	0.622254
CARD8	0.47	ZFAND5	0.402912	CRABP1	0.622183
ZBTB20	0.47	SRSF9	0.402747	ILK	0.621924
HSPA4	0.47	CYP4F22	0.402418	ADGRB2	0.621128
BX476711	0.47	OSER1-AS1	0.402342	PCP4L1	0.620319
XRN1	0.47	KIF23	0.402334	CAMKK1	0.61998
KIAA0256	0.47	LY9	0.402289	LOC101927948	0.619839
SBF2	0.47	HMGXB4	0.401981	WNK4	0.618615
THC2612020	0.47	CSTF3	0.401671	MCEMP1	0.617585
THC2491396	0.47	RNF213	0.401639	RBM24	0.616285
ZNF676	0.47	LOC100653233	0.401632	TFEC	0.61527
TNRC6C	0.47	SPTA1	0.40153	MAMSTR	0.614789
ERAP2	0.47	NMUR1	0.401392	CFAP45	0.614433
MRPL19	0.47	PEX12	0.401191	C1QTNF4	0.614133
ZPBP2	0.47	GRTP1	0.40105	DUSP15	0.613737
NQO1	0.47	PRRC2C	0.400994	RFESD	0.613348
CCDC128	0.47	TTLL9	0.400912	LINC01525	0.61289
C6orf60	0.47	ZNF440	0.400818	ARRDC4	0.612388
THC2721409	0.47	CASP8AP2	0.400804	MIR4734	0.611992
PIP4K2A	0.47	LSM12	0.400723	CT45A6	0.611992
THC2713668	0.47	P2RX3	0.400692	GAP43	0.611852
CFH	0.47	KLC3	0.400473	FLJ21408	0.611404
THC2653001	0.47	TSR1	0.400416	LIM2	0.611218
C9orf105	0.47	SPEN	0.4003	IGSF9	0.611024
FAM81A	0.47	ZNF708	0.400137	LOC102723895	0.610825
ZNF567	0.47	ZNF644	0.399954	OSGEPL1-AS1	0.60957
PDS5B	0.47	GPC3	0.399929	TMEM8C	0.608814
UACA	0.47	SETSIP	0.399792	LINC02398	0.608652
HCCS	0.47	SLC26A1	0.399691	PM20D1	0.608288
THC2645690	0.47	RIPK3	0.399691	SHROOM1	0.607911
C6orf35	0.47	STIL	0.399618	ABHD11-AS1	0.607085
SFRS12IP1	0.47	ALAS1	0.399521	LRRC73	0.607085
UBR1	0.47	EDRF1	0.399424	NPR1	0.6069
RGPD2	0.47	GPX3	0.399417	SLCO2A1	0.606491
C10orf28	0.47	LAMC2	0.399411	PROX1	0.606026
RAB12	0.47	FREM1	0.399064	LOC645166	0.605779
THC2661433	0.47	PDIA6	0.399014	TBC1D9	0.604719
LACTB2	0.47	SON	0.398894	C1orf167	0.604701
NBN	0.47	SPIN2A	0.398672	CYB5A	0.604584
TUG1	0.47	LOC101928414	0.398653	LOC100506869	0.603994
BBS10	0.47	C1QTNF9B	0.398653	LOC100506497	0.603912
THC2709754	0.47	MRPL13	0.398382	DEFB131	0.603588
A_24_P703614	0.47	CASP4	0.398312	LINC01554	0.602632
A_24_P417757	0.47	TUBE1	0.398243	ODF3L2	0.601784
EIF3A	0.47	WDR86	0.39805	MORC2-AS1	0.60168
A_24_P110521	0.47	ZSCAN26	0.397757	CAMK2A	0.601662
CAST	0.47	SLC38A6	0.397495	EGR4	0.600898
C5orf33	0.47	BCLAF1	0.397145	LZTS3	0.600832
GSTCD	0.47	LOC101927391	0.397106	CASC17	0.600339
AF085902	0.47	HSBP1L1	0.396982	ADAM20P1	0.600225
LYRM5	0.47	VPS4B	0.39698	KCNK17	0.60008
RNF169	0.47	HIPK2	0.396712	PRRG2	0.599594
LRMP	0.47	PGC	0.396675	SERPING1	0.597335
NDUFS4	0.47	PBK	0.396526	GABRG1	0.597097
EML4	0.47	CEP350	0.396461	STYK1	0.595981
TMTC4	0.47	CUEDC1	0.39634	OSTN	0.595878
BX538272	0.47	ELFN1	0.396077	GRXCR1	0.595769
GLS	0.47	DUXA	0.395866	ABCD1	0.595693
C4orf15	0.47	TMPRSS12	0.395796	IL15	0.595348
SLC22A16	0.47	AGPAT1	0.395479	KLF8	0.593551
ZNF107	0.47	RNF146	0.395297	CPLX1	0.592884
ZNF658B	0.47	A1CF	0.395147	VNN3	0.5918
A_23_P165819	0.47	DDX11-AS1	0.394988	CLDN7	0.591771
THC2531250	0.47	TLE4	0.394975	LINC01433	0.590736
NBPF15	0.47	GRIA3	0.394883	TCP10L2	0.59068
C2orf30	0.47	AGAP4	0.394681	VCX	0.59032
SEC31B	0.47	CAST	0.394183	LINC02139	0.59032
OSBPL8	0.47	CSTF3-AS1	0.394024	SDSL	0.590172
WBP4	0.47	SRRM1	0.394009	FAM41C	0.589992
BQ272125	0.47	CXCL2	0.393716	MYT1	0.589749
ENST00000305570	0.47	SPATA20	0.393626	LOC101927359	0.588941
DKFZP434I0714	0.47	DNER	0.393361	NDUFA13	0.58889
EBF3	0.47	ARRDC1	0.393325	THAP2	0.58881
ENDOD1	0.47	LOC100507639	0.393322	SERPINE3	0.588463
THC2687922	0.47	CPOX	0.393295	LINC01191	0.588376
MGC29891	0.47	WSB1	0.393051	TRHR	0.588299
RHOBTB3	0.47	LINC01756	0.392973	DCST1	0.588177
PLS1	0.47	LEXM	0.392806	ISG20	0.588008
MRPS9	0.47	TRPT1	0.392766	LOC100507477	0.587564
ZNF433	0.47	LINC01534	0.392734	FAM212B	0.587422
TEC	0.47	ANKRD40	0.39272	LINC00960	0.587362
ZNF320	0.47	PMPCB	0.392543	SCARNA2	0.586628
CREB5	0.46	SLC6A16	0.392343	LINC00958	0.586595
MKLN1	0.46	KIAA0895L	0.39228	TRPM4	0.586539
AF086077	0.46	CENPW	0.392231	UCHL1-AS1	0.585914
C15orf29	0.46	LOC102724428	0.391946	CSHL1	0.585796
THC2649856	0.46	RCBTB2	0.391875	P4HA2-AS1	0.585749
RNF6	0.46	RSRP1	0.391457	AKR1C2	0.58563
CR627148	0.46	LOC399715	0.391026	ZNF703	0.585565
KLC3	0.46	MICB	0.390622	LHFPL4	0.585411
CCNC	0.46	VENTX	0.390273	SFN	0.584897
NUFIP2	0.46	LOC283177	0.390046	ARL2BP	0.584759
BMI1	0.46	LOC101929224	0.389694	IGLON5	0.584698
AY010114	0.46	SMIM11B	0.389687	DUSP1	0.584673
BX641010	0.46	GTF2H2B	0.389545	FANCD2OS	0.584227
MKKS	0.46	RPAP3	0.389414	TACR2	0.583646
ZNF765	0.46	KEL	0.389315	ZNF792	0.583495
THC2634329	0.46	LOC101928226	0.389155	LINCR-0002	0.583461
CDK2AP1	0.46	MYH13	0.38891	EYA1	0.583261
MAP3K5	0.46	RAB41	0.388851	LINC00265	0.583233
SYT15	0.46	LINC02289	0.388762	NLRP14	0.583227
THC2769953	0.46	ZBTB25	0.388374	SLC16A14	0.58299
A_32_P10665	0.46	SCNN1D	0.388185	C21orf91-OT1	0.58263
A_24_P682550	0.46	GLUD2	0.388166	DEFB118	0.582507
ACADM	0.46	B4GALT4	0.388115	LINC01360	0.582228
LPHN3	0.46	PPME1	0.388027	PAXBP1-AS1	0.581667
ZNF716	0.46	ZNF703	0.387896	NFKB2	0.581203
EXOC6	0.46	CRYGD	0.387686	FPR1	0.580743
ARMC8	0.46	RIF1	0.387566	EPAS1	0.580648
AL109708	0.46	RHOBTB2	0.387471	DLGAP2	0.580631
ZNF281	0.46	ZFR	0.387387	SIGLEC11	0.580591
BCCIP	0.46	SLC9A3	0.387357	NUDT11	0.580591
UBE3B	0.46	VIL1	0.387265	CLEC17A	0.580517
TRIM6	0.46	LOC101927895	0.387213	LOC440028	0.58032
ATP11B	0.46	KIAA0232	0.387106	KIR3DX1	0.580253
A_23_P141785	0.46	KDELC2	0.386613	LINC02043	0.579703
DPY19L2P2	0.46	TEX29	0.386403	SYDE1	0.579294
ITSN2	0.46	MEG3	0.386349	CHADL	0.579091
A_24_P852099	0.46	GPD1	0.386303	PDE6H	0.578217
PRKAR2A	0.46	NMI	0.385886	PIH1D3	0.57821
MTRF1	0.46	TMED2	0.385711	CCDC155	0.578196
AW797858	0.46	LINC00636	0.385689	OC90	0.578171
USP8	0.46	CDH26	0.385332	WNT10A	0.577444
HSDL1	0.46	ALG11	0.385254	MOGAT2	0.577393
ABCA11	0.46	ELF1	0.38525	CDX4	0.577306
TTK	0.46	TFF1	0.385139	C4A	0.576811
ASXL3	0.46	E2F8	0.384695	MCRIP2	0.576758
PPWD1	0.46	ASPM	0.384663	SLC19A3	0.576302
THC2697409	0.46	NEK7	0.384633	TTLL7	0.576037
CR603982	0.46	CBARP	0.384435	LOC101927305	0.575913
THC2645398	0.46	LOC100506127	0.384155	LIFR-AS1	0.575363
KIAA0746	0.46	CPA1	0.384117	LARGE2	0.575041
PURB	0.46	HYPK	0.384069	HRG	0.574677
STAP1	0.46	LOC286297	0.383913	PHLDA3	0.57451
A_32_P24080	0.46	RBBP6	0.383898	ZNF626	0.573923
RBAK	0.46	MASTL	0.383736	CYP4Z1	0.573609
KCNJ6	0.46	LOC100129518	0.383582	ABHD4	0.573489
BC042026	0.46	LINC00589	0.383498	ADGRF5	0.572744
CENTG2	0.46	TOB2	0.383481	TCL6	0.571776
AK055214	0.46	WDR3	0.383425	RLBP1	0.571564
LOC100133781	0.46	ETNK1	0.383392	SYPL2	0.570836
A_24_P814872	0.46	EXOC1	0.383376	L3MBTL1	0.569821
CUL3	0.46	CALHM2	0.383242	C5AR2	0.569323
BC015370	0.46	RNF215	0.383139	LINC00351	0.569241
KLRK1	0.46	MAP1LC3C	0.383125	TSPAN33	0.568878
A_24_P556328	0.46	CERS2	0.382866	NBPF4	0.568497
2009-03-04	0.46	NSA2	0.382519	MYH15	0.567852
STX7	0.46	VPREB3	0.382514	NMRK2	0.567847
PDCL	0.46	LIPN	0.382261	FAM159B	0.567618
IPPK	0.46	DBF4	0.382186	LINC01549	0.567165
XR_018765	0.46	BTN3A2	0.382031	HSPA12A	0.567087
PAG1	0.46	HMX2	0.381851	TMEM225B	0.566748
KIF23	0.46	OSER1	0.38174	LGALS4	0.566395
BC047753	0.46	SLC36A4	0.381667	LOC100507387	0.565616
SLC35A1	0.46	CA14	0.381564	PRSS27	0.565224
PPIG	0.46	APTR	0.381386	TMEM236	0.564655
THC2618322	0.46	LOC100507424	0.381379	TBC1D8B	0.563514
THC2727302	0.46	DCTN1	0.381021	LCTL	0.563341
THC2617352	0.46	HMGN2	0.380807	OR2D3	0.563187
DZIP3	0.46	PRRG3	0.380567	LINC00562	0.563134
RSRC2	0.46	LINC01230	0.380397	NOP53-AS1	0.563057
THC2545097	0.46	ZNF71	0.380261	SLC1A5	0.562575
VHL	0.46	KRT12	0.380214	MYO15B	0.562137
FASTKD1	0.46	TIMM29	0.380058	TM4SF5	0.561285
FSTL5	0.46	PABPC1	0.379924	KCNE2	0.561284
ENST00000371081	0.46	SNX18	0.379786	LOC101929488	0.560748
C17orf63	0.46	GLDC	0.379565	DHRS2	0.560159
A_32_P197976	0.46	BPY2B	0.379517	PRG3	0.560134
A_24_P705136	0.46	SQSTM1	0.379432	FAM237A	0.560046
A_24_P306585	0.46	ANKRD12	0.37939	LOC101929680	0.55988
MTCH2	0.46	CLDN9	0.379282	FAM30A	0.559842
THC2490258	0.45	ABCE1	0.379055	RPS6KL1	0.559612
UFM1	0.45	LINC00672	0.379039	SERPINE2	0.559324
A_23_P201521	0.45	CCSAP	0.378901	LINC01693	0.559212
AGT	0.45	ZBTB6	0.37881	SH3BP5L	0.559143
CAPRIN1	0.45	C9orf152	0.37865	LOC105379143	0.558576
THC2683295	0.45	NEMP2	0.37831	CSF1	0.558474
C13orf3	0.45	CTNNAL1	0.378298	CCDC27	0.558012
ZNF322B	0.45	ACBD3	0.378278	HRAT92	0.557992
THC2710559	0.45	GFRA3	0.378252	MRNIP	0.557869
LIN7C	0.45	LGALS12	0.378066	LINC01509	0.557684
ARL5A	0.45	APPL2	0.377867	LIPM	0.557507
SPAST	0.45	GHET1	0.37754	LOC102724360	0.557426
S81524	0.45	ZNF107	0.377501	STOML3	0.557036
C1orf119	0.45	BCO2	0.376952	FADS6	0.556253
ND2	0.45	ZFP82	0.37656	TMEM235	0.555987
PSIP1	0.45	CEBPB	0.376522	ERRFI1	0.55587
PEX11B	0.45	BTG3	0.376462	FAM166A	0.555807
PTGER4	0.45	RORA	0.376114	AP4B1-AS1	0.55554
DTWD2	0.45	LOC101927657	0.375807	CDR1	0.555467
ZNF681	0.45	KIAA1586	0.375738	LOC101928663	0.555383
DDX26B	0.45	EIF2AK2	0.375623	CYP4F3	0.555185
BC004287	0.45	PTPN11	0.375386	TAS1R1	0.554621
IL6ST	0.45	LINC02389	0.375332	TEX29	0.554328
A_24_P281853	0.45	ZNF701	0.375076	FAM222A	0.554202
SSX2IP	0.45	NRDC	0.374914	KCNG4	0.553955
CAMSAP1L1	0.45	TTC32	0.3749	UPK1B	0.553182
AK056686	0.45	TGDS	0.374443	SSTR5-AS1	0.551843
TPMT	0.45	APEX1	0.37425	ARHGEF15	0.549933
CCDC82	0.45	CHUK	0.37421	LOC101927143	0.549177
A_32_P145159	0.45	FHL5	0.374102	ATP2A1	0.547512
THC2677432	0.45	NUDT10	0.374002	SMIM22	0.54735
PDS5A	0.45	TNFAIP8L3	0.373966	FAM109B	0.547254
PIK3CB	0.45	KMT2E	0.373761	LOC102724511	0.547233
LRIG3	0.45	PSMB8	0.373732	LOC101929234	0.547121
LAMP1	0.45	PSMD11	0.373689	DUXA	0.547012
PSD3	0.45	CLN6	0.373635	LOC100861532	0.546126
TYW3	0.45	NKX6-1	0.373619	NFYC-AS1	0.54592
KIAA0492	0.45	USP18	0.373594	FBXO2	0.545799
KIAA0776	0.45	SBF2-AS1	0.373564	TRNP1	0.545582
ENST00000334994	0.45	RNF219	0.373459	ENO4	0.544887
GOLGA2LY1	0.45	COG3	0.373351	ATP1A1-AS1	0.544534
STXBP4	0.45	IZUMO2	0.373139	C2orf66	0.542248
SNX2	0.45	PCK1	0.373133	ASTL	0.542205
CDKN1B	0.45	CCDC152	0.373103	ITGB4	0.542067
THC2488254	0.45	GMEB1	0.372595	MANEAL	0.541891
ZNF100	0.45	ANAPC15	0.372468	PRRT3	0.540994
FLJ25006	0.45	ASCL1	0.3723	F10	0.540136
ALS2	0.45	VTRNA1-1	0.372006	RNVU1-19	0.539841
MTERFD2	0.45	IFI27L2	0.371809	MS4A6E	0.539245
BU928689	0.45	MOCS2	0.37159	APOE	0.538617
NUCKS1	0.45	LINC00934	0.371417	LRRC57	0.53846
AK024926	0.45	LURAP1L-AS1	0.371226	ZNF41	0.537942
RP11-679B17.1	0.45	SPATA31A3	0.37114	PPP1R1A	0.537853
TMED8	0.45	CYSLTR1	0.371136	LINC01412	0.537237
USP9X	0.45	C15orf32	0.370961	HAMP	0.537206
AK022083	0.45	RGS2	0.370844	LINC00845	0.536949
AB072895	0.45	DLGAP3	0.370841	SBF2-AS1	0.535748
MGC24103	0.45	CBX8	0.370658	LINC00254	0.535563
THC2673888	0.45	SHANK3	0.370425	INTS6L-AS1	0.535385
AP4S1	0.45	NUFIP2	0.370414	CST6	0.534962
SDCCAG8	0.45	RIT1	0.370281	LINC01999	0.534523
KIAA1737	0.45	PRSS36	0.370115	CMKLR1	0.533313
CLGN	0.45	YBX1	0.370076	GAS6	0.533122
SLC35E4	0.45	C1QTNF3-AMACR	0.370075	C8orf82	0.532951
CCNL1	0.45	LYSMD3	0.369852	TRIM39	0.53287
LARP7	0.45	LINC00857	0.369802	F5	0.532166
THC2544012	0.45	PPM1K	0.369649	TXNIP	0.531996
THC2719959	0.45	ABRACL	0.369605	SLCO1A2	0.531955
ITSN1	0.45	C6orf62	0.369551	HCAR2	0.531923
ZFYVE16	0.45	CRCP	0.3695	CH17-340M24.3	0.531806
KIAA1370	0.45	CDK6	0.369499	ADAMTS15	0.531535
TTC28	0.45	LOC101927572	0.369327	FAM103A1	0.531489
ZNF813	0.45	TMC2	0.369312	TTC34	0.531433
A_24_P530900	0.45	ZNF774	0.369168	CEACAM3	0.530703
RCOR3	0.45	AMTN	0.369058	LOC100506679	0.530646
LOC256273	0.45	KDM6B	0.368436	TSSK3	0.530386
TMED5	0.45	OR2B6	0.368377	IQCG	0.530385
AK096154	0.45	LRP6	0.368313	STRA6	0.530051
CDC27	0.45	KLF6	0.368285	SP2	0.530028
ZNF608	0.45	JRKL	0.368152	CATSPER4	0.529931
ENST00000380759	0.45	PAXIP1	0.367918	DUSP8	0.52982
TPRKB	0.45	C9	0.367795	RAB38	0.529732
THC2529512	0.45	PRR5	0.367497	LINC01578	0.529394
RC12	0.45	HSD17B7	0.36734	IL7R	0.528653
S69873	0.45	PRDM4	0.367092	DPH6-AS1	0.528578
TGFBR2	0.45	SLC1A2	0.367008	LOC100506985	0.528319
HIST1H2AK	0.45	SLC25A15	0.366864	SNAP91	0.528266
EPB41L5	0.45	ODF3L2	0.366671	TRIM60	0.527831
OVOS2	0.45	RB1CC1	0.36663	PTCHD3	0.527322
ROCK2	0.45	GALNT11	0.366584	LOC101928107	0.527321
ZNF92	0.45	NIF3L1	0.365985	RRH	0.527128
BC037535	0.45	PAXBP1	0.365897	TMEM234	0.526853
A_23_P2032	0.45	PARP1	0.365544	LOC105377763	0.526683
SMAD2	0.45	GPC2	0.365485	CHRNA10	0.526517
EXOC3	0.45	TNPO1	0.365466	LOC101929099	0.525875
DIS3	0.45	PA2G4	0.365329	PRRT3-AS1	0.525824
LOC644297	0.45	IRF2BP2	0.36532	TMEM132A	0.525563
AK024680	0.45	PIK3IP1	0.365276	SLC43A3	0.524944
CCDC99	0.45	SLC4A1AP	0.365205	PAEP	0.523482
KATNAL1	0.45	PCF11	0.365165	CCL26	0.523458
CAB39	0.45	TM7SF3	0.364822	MYLK4	0.52308
PAIP2	0.45	SRGAP2B	0.364782	RAD54L	0.522304
GK	0.45	ZNF267	0.364758	ASB11	0.522234
WBP2NL	0.45	LINC00308	0.364728	LINC00210	0.522121
UEVLD	0.45	ZNF670-ZNF695	0.364634	DCN	0.521665
ARL6IP2	0.45	LOC100507464	0.364273	LOC284632	0.521095
THC2606573	0.45	LOC101927204	0.364147	HCG27	0.520949
PDZD7	0.45	PRG4	0.363999	GACAT3	0.520886
RPS27L	0.45	GALNT15	0.363849	LOC105372582	0.520758
CD359823	0.45	MIRLET7DHG	0.363647	PNPLA3	0.520576
WDR5B	0.44	TTF1	0.363616	VRTN	0.520456
CXorf10	0.44	MTR	0.363512	MBNL3	0.520351
ATM	0.44	NPIPB5	0.363404	ANKRD31	0.520253
DYRK1A	0.44	GDF9	0.363401	SERPINB9P1	0.520163
NARG2	0.44	EXOSC8	0.363319	ATP1B2	0.519464
TXNDC9	0.44	HINT3	0.363005	KCND3	0.519464
NEK2	0.44	TNK1	0.362983	TRIM16L	0.519056
THC2612011	0.44	MSANTD3-TMEFF1	0.362977	PLA2G4D	0.51881
SMEK1	0.44	CHIT1	0.362898	KLHL3	0.518444
CALM2	0.44	ASPHD1	0.362205	ZNF831	0.518003
KIAA1432	0.44	STUM	0.362022	LOC105378663	0.517921
LOC344593	0.44	GATA4	0.362021	LOC101928238	0.517845
ZBTB44	0.44	CCDC66	0.361761	KDELR3	0.517811
KIAA1279	0.44	TRAM2-AS1	0.361759	PPP1R26-AS1	0.517555
ZNF484	0.44	ZSCAN18	0.361601	OLFML1	0.51733
LOC92482	0.44	CLDN12	0.361594	SH3GL2	0.517133
ZNF429	0.44	FAM138B	0.361584	F8A2	0.517097
FZD1	0.44	TCP10	0.361557	RASAL2-AS1	0.516707
PPT1	0.44	SNTN	0.36122	LOC105372672	0.516515
STX3	0.44	DGUOK-AS1	0.360889	IYD	0.516158
PNRC2	0.44	MYL2	0.360844	LOC101928489	0.516156
AMAC1	0.44	THAP6	0.36081	CD300LB	0.515664
A_24_P230009	0.44	FDPS	0.360735	MPP2	0.515446
DICER1	0.44	PVALB	0.360674	CLDN6	0.515431
AW973470	0.44	NPC1L1	0.360459	CTAG1B	0.515393
CRY1	0.44	AZGP1	0.360433	NKX2-6	0.515373
THC2492936	0.44	MED13	0.360057	THAP9	0.515296
EIF5B	0.44	FAM238A	0.359614	EDC3	0.514963
THC2507965	0.44	ALDH3A1	0.359467	LINC00955	0.514892
THC2660562	0.44	RRP15	0.359186	NCAN	0.514861
GABARAPL1	0.44	RAD54B	0.359003	LOC339593	0.514836
CSGALNACT1	0.44	BOD1L2	0.358661	GSDMB	0.514104
UPF2	0.44	CDX2	0.358002	SPRY3	0.514068
UNQ1887	0.44	COIL	0.358002	PI16	0.513957
FYTTD1	0.44	ZNF582	0.35777	RNVU1-7	0.513544
C21orf55	0.44	PTENP1-AS	0.357494	ZFX-AS1	0.513306
IGF1R	0.44	ZNF169	0.357466	MRGPRE	0.512261
AA151106	0.44	MRPS31	0.357445	GLB1L2	0.512028
ZNF800	0.44	LOC100996693	0.357294	BAALC-AS1	0.511876
DYNC2H1	0.44	CKAP2L	0.357255	PRX	0.511455
GPR107	0.44	GAL3ST1	0.35714	ADAMTS13	0.511096
PIK3CA	0.44	ALKBH8	0.357015	FRMPD2	0.510908
THSD7A	0.44	LARP4	0.357012	LINC01859	0.510669
A_32_P182135	0.44	PGGT1B	0.356812	LINC-PINT	0.51061
BC043411	0.44	BRCA2	0.356806	PRSS53	0.510364
VTI1B	0.44	TBC1D28	0.356803	CHODL-AS1	0.50951
ENST00000354586	0.44	CTC-338M12.4	0.356758	LINC02130	0.509146
ZNF492	0.44	IFNAR2	0.356271	LINC01235	0.508981
PHKB	0.44	ARHGAP11B	0.356032	FLJ30679	0.508957
ANKMY2	0.44	PPM1L	0.355994	MX2	0.508683
FAM80A	0.44	BSX	0.355772	LINC01423	0.508643
UBXD2	0.44	PIGB	0.355687	ZNF534	0.508388
AK022155	0.44	LUC7L3	0.355577	LOC100507002	0.508235
FUT6	0.44	KIF15	0.355552	LOC101927079	0.507959
RAB18	0.44	NPAT	0.355413	GPR153	0.507887
SGMS1	0.44	MYCT1	0.355408	RNVU1-18	0.507722
THC2631150	0.44	EIF4E2	0.355187	LINC01653	0.507476
ZBTB2	0.44	SLC37A4	0.355041	LINC00342	0.507307
SRPK1	0.44	TOP1	0.354991	DNAJB5-AS1	0.506741
BC069659	0.44	DNAJB6	0.354721	CD300LD	0.506449
RMND5A	0.44	IGFBP2	0.354596	CFAP100	0.506393
ENST00000394255	0.44	UTRN	0.35458	STMND1	0.505549
SLC25A44	0.44	ZNF354B	0.354396	ABCA9	0.505296
MPHOSPH9	0.44	TXN	0.354025	CDNF	0.505125
EZH2	0.44	IRF7	0.353959	FGF1	0.505082
SCYL3	0.44	CCDC184	0.353936	LOC102724919	0.505075
KIAA1715	0.44	TRAK2	0.353868	LOC100128317	0.505045
AF086376	0.44	NQO1	0.353757	ANO8	0.504778
UTP3	0.44	ZNHIT3	0.353751	HIST1H4D	0.504456
KCND3	0.44	FKBP3	0.353747	NKX6-2	0.504175
ZFAND6	0.44	MYBPHL	0.353431	KCNV1	0.50399
WRN	0.44	LINC00987	0.353293	PTGS2	0.503975
CCDC93	0.44	SLC52A1	0.353241	PDGFRB	0.503841
CG012	0.44	AFG3L2	0.35294	CDHR5	0.503393
F11R	0.44	ANKRD20A2	0.352791	LYRM4-AS1	0.503313
THC2731533	0.44	DNAJB13	0.352735	C2orf73	0.502944
COG2	0.44	SFRP4	0.352693	MICALL2	0.502913
KNTC1	0.44	BNIP1	0.352663	NUAK2	0.502906
ZNF99	0.44	CC2D1B	0.352635	KL	0.502607
THC2722466	0.44	GABARAPL1	0.352548	TNMD	0.502303
THC2746310	0.44	BTN2A1	0.352426	ZNF716	0.502224
AL049390	0.44	FGFR1OP2	0.352409	TRAPPC3L	0.501347
GCLM	0.44	CYP4X1	0.352399	FSD2	0.501312
WDR26	0.44	GUCA1A	0.352154	CXCL12	0.500888
THC2514496	0.44	ATXN2L	0.352143	FAM83B	0.500177
ATP5E	0.44	SNRNP27	0.352133	TOGARAM1	0.500101
RFPL3S	0.44	DDX19B	0.351792	LOC100507639	0.500007
VAV3	0.44	CDV3	0.351752	MCCD1	0.500007
COG3	0.44	METTL2B	0.351639	PPEF2	0.499707
AF086551	0.44	SERPINE3	0.3516	TRIM2	0.499433
RIOK2	0.44	TTC3	0.351408	BANF2	0.498222
ENST00000310267	0.44	FAM169B	0.35098	ACTN3	0.498045
ARL1	0.44	XRCC3	0.35069	DIO1	0.497619
THC2524424	0.44	SNRK	0.350565	ZNF341-AS1	0.496901
REST	0.44	SRSF11	0.35052	ART1	0.496397
CXorf21	0.44	ATP6V0A4	0.350484	TMEM92-AS1	0.495781
ZNF571	0.43	TCEAL3	0.350387	ZNF829	0.495769
GALNT3	0.43	LYPD4	0.350372	CHD2	0.49558
THC2492329	0.43	DNAJB14	0.350285	SGTB	0.495524
A_32_P132883	0.43	TYMSOS	0.350142	TMEM150B	0.495387
ZZZ3	0.43	LINC00998	0.34993	SLC2A12	0.494843
CMTM3	0.43	INSR	0.349711	SLC46A1	0.494753
NARG1L	0.43	PEX5	0.349706	SPOCK2	0.494588
TMEM184B	0.43	C3orf84	0.349658	LRRC74B	0.49452
ZNF146	0.43	IMPG2	0.349553	XDH	0.494513
MEF2B	0.43	C21orf91	0.349318	SLA2	0.49443
BE835321	0.43	RNF6	0.349277	BTNL2	0.494352
AF085846	0.43	CCDC93	0.349246	S100A11	0.49429
CDR2	0.43	CCDC160	0.349147	KCNJ1	0.494208
ZNF208	0.43	SLC16A4	0.349142	LINC00996	0.493967
ZNF181	0.43	UGCG	0.348996	PLAC8L1	0.493908
STARD3NL	0.43	TMEM14C	0.348927	CAPS	0.49361
PRDM10	0.43	MAD2L1BP	0.34886	LINC01744	0.493608
SPECC1	0.43	GPR83	0.348741	MDM2	0.493516
A_32_P108203	0.43	STT3A-AS1	0.348491	DPPA4	0.493354
ZNF43	0.43	ZBTB11-AS1	0.348399	MSS51	0.493183
EDEM3	0.43	PEX14	0.348388	DCAF4L1	0.492975
PLXNC1	0.43	SERPINB10	0.348298	SLC4A8	0.492566
ZDHHC21	0.43	FXR1	0.348294	BDNF	0.492399
KRCC1	0.43	TMEM47	0.348058	LGSN	0.492373
DNAJC3	0.43	SSB	0.348009	PKIA-AS1	0.49187
CA311732	0.43	ASZ1	0.347878	TBC1D3P1-DHX40P1	0.491561
SERBP1	0.43	MRPS36	0.347774	SLC35E2	0.49105
BX389966	0.43	BATF2	0.347729	EBI3	0.491007
ARHGEF12	0.43	RRBP1	0.347631	NGFR	0.490959
DMTF1	0.43	LAMA1	0.347597	ATXN8OS	0.490958
AK021751	0.43	SCARA3	0.347539	LINC00392	0.490587
ZFAND1	0.43	MEX3B	0.347201	NMU	0.489757
AMY2B	0.43	EMC2	0.347063	MAP10	0.489696
DPP8	0.43	TRUB1	0.347058	MYOZ1	0.489122
ZNF682	0.43	TEAD1	0.347046	CYYR1	0.489073
D00022	0.43	TAF1	0.346908	LINC01215	0.489029
BF446608	0.43	KLF2	0.346865	SLC22A18AS	0.48864
DEF8	0.43	COPS7A	0.346746	LOC101928416	0.488077
CCDC11	0.43	ZNF461	0.346626	ZNF559	0.488077
AK309617	0.43	CEBPZ	0.346521	CA1	0.487768
RUNX1	0.43	PIGA	0.346297	NTF4	0.487685
PHF15	0.43	ITIH2	0.346245	C10orf55	0.487448
RYR3	0.43	LINC01195	0.346129	ISL1	0.485694
BRWD3	0.43	HFE2	0.345951	USHBP1	0.485689
IMPACT	0.43	C12orf4	0.345805	PDE6G	0.485261
TRIM52	0.43	PIGO	0.345761	MOCOS	0.484958
C9orf5	0.43	ZNF621	0.345601	LY6G5C	0.484871
SETX	0.43	BSN-AS2	0.345601	C5orf46	0.484738
BI050742	0.43	RIPK2	0.345598	UTS2B	0.484689
THC2730823	0.43	RAB11FIP2	0.345566	INSL6	0.484557
SVIP	0.43	RBM27	0.345357	PLAT	0.484417
CAV2	0.43	CUL5	0.345308	GPR3	0.484387
AK023112	0.43	LOC101928100	0.345273	STRC	0.483655
TMEM32	0.43	CHKB	0.345213	THRB-AS1	0.483505
NR2C1	0.43	LIN7C	0.345162	DNAJC27-AS1	0.483183
SYPL1	0.43	ZEB1	0.34493	GTF2IRD2	0.481885
NR2F1	0.43	SSSCA1	0.344775	PLBD1-AS1	0.481769
AL137400	0.43	ZCCHC14	0.344738	RAB4B-EGLN2	0.48125
RAB2A	0.43	NLRP14	0.344595	APBB1	0.480623
C10orf136	0.43	KLF9	0.344594	ZIK1	0.480576
RALGPS1	0.43	GOLGA5	0.344545	SLC35E4	0.480498
ZNF365	0.43	C18orf8	0.344516	CNR2	0.480329
XRCC2	0.43	TYW3	0.344081	BLOC1S6	0.479984
ZNF525	0.43	LINC01603	0.343509	ZPBP2	0.479884
SP100	0.43	PARPBP	0.343494	HESX1	0.479575
LRRC6	0.43	ZNF225	0.343284	SYP-AS1	0.479516
C14orf138	0.43	IL36B	0.343133	C9orf57	0.479064
TMEM161B	0.43	REL	0.342834	MANSC1	0.478564
KIAA0907	0.43	SDC2	0.342788	PDE6B	0.47849
THC2651047	0.43	TBK1	0.342757	LINC00877	0.477433
RAPGEF2	0.43	ZNF75D	0.342706	PUS3	0.477126
AF130062	0.43	CETP	0.34267	TCTN1	0.476727
AGPS	0.43	TTC21A	0.342521	SIM2	0.476692
C10orf140	0.43	MORN2	0.342388	ZNF585B	0.476614
NEDD4	0.43	HRAT92	0.342375	FUT7	0.475557
A_32_P139311	0.43	FEM1B	0.342375	SLC16A13	0.47554
PAPD1	0.43	CEP83-AS1	0.342296	CCDC120	0.474958
C20orf199	0.43	LAIR2	0.341857	GPR108	0.474888
TMF1	0.43	NSRP1	0.341624	PKDCC	0.474666
ZNF75A	0.43	USP16	0.341606	HYI	0.474531
BCAP29	0.43	CLCNKB	0.341552	KCNA6	0.474341
SOS2	0.43	PCNT	0.341497	CAPRIN2	0.474194
AK123481	0.43	LRRC31	0.341362	ARMCX5-GPRASP2	0.473919
LOC286161	0.43	MIR210HG	0.341357	LINC01939	0.473798
SNORD22	0.43	TAF6L	0.341235	LOC100132146	0.473636
A_24_P348791	0.43	TTC33	0.341164	LINC01545	0.473618
DCBLD1	0.43	BPTF	0.341117	LINC01983	0.473604
THC2532162	0.43	TCP1	0.341111	ACTA2	0.473081
SEC62	0.43	ATAD2	0.341093	LINC00899	0.472959
PTP4A1	0.43	GTPBP4	0.341066	ARHGEF26-AS1	0.472555
NAAA	0.43	PPP1CB	0.340816	MSH4	0.472276
ZNF709	0.43	CASQ1	0.340586	LOC102724163	0.472202
TAF9	0.43	G6PC	0.340514	GRIN2C	0.47208
USP34	0.43	ADAM11	0.340407	LOC101927178	0.471922
WDR67	0.43	PNRC1	0.340386	LINC01864	0.471771
GABRE	0.43	MTERF4	0.340309	RHBDL3	0.471118
SLC24A1	0.43	RBM17	0.339978	LSR	0.471038
SLC35D1	0.42	PANDAR	0.33973	LOC728084	0.470923
DNM1L	0.42	SAP30	0.339692	GRK7	0.470644
ZNF479	0.42	BLZF1	0.33962	AP3B2	0.470522
HIST1H1E	0.42	TMA16	0.339303	REEP5	0.46859
ZNF808	0.42	MSMO1	0.339278	TREML2	0.468311
ESCO1	0.42	LRRTM4	0.338905	MRAP	0.467974
ENST00000399723	0.42	B9D1	0.338867	TNFAIP2	0.46788
PRPF38A	0.42	MIR4458HG	0.338497	NNMT	0.46756
ADAMTS20	0.42	TRMT6	0.338326	ZSCAN10	0.467305
AK021676	0.42	HSPA1A	0.338317	PMAIP1	0.467271
VCPIP1	0.42	ADGRD1	0.338033	CLDN10	0.467227
SERF1B	0.42	CFHR3	0.337798	DUSP4	0.466821
DQ786299	0.42	PTRH2	0.337571	KLHL11	0.466522
RNF141	0.42	WDR75	0.33754	TMEM106A	0.466391
VPS26A	0.42	CBLL1	0.337511	SPATC1	0.466352
KCNJ14	0.42	PHIP	0.337243	SLC38A6	0.466218
BSN	0.42	TOMM40L	0.337183	ENPP7	0.465314
SERF1A	0.42	KMT2A	0.336941	C3orf70	0.465207
RC3H1	0.42	TRIM74	0.3369	VTCN1	0.465029
PTPLAD1	0.42	FAM24B	0.336861	NPW	0.465016
YTHDF3	0.42	SPATA5L1	0.336843	NRP2	0.46471
AK123439	0.42	CHURC1-FNTB	0.336623	CGN	0.464609
SENP2	0.42	FRMD4A	0.336164	MEIS3	0.464229
RAD17	0.42	GPI	0.336111	LILRB3	0.464173
AK125269	0.42	TMX3	0.335937	TEPP	0.464117
UBE3C	0.42	SMTNL1	0.335865	MIR3648-1	0.463624
STX2	0.42	KLHL30	0.335865	ESR2	0.463305
DDX58	0.42	THRAP3	0.33585	LINC01336	0.463137
UCHL3	0.42	HKDC1	0.335587	SPIN3	0.463044
MRS2	0.42	NPIPB3	0.335333	UPK3A	0.462903
PLK4	0.42	CNBP	0.335217	MAGEB10	0.462865
ANP32E	0.42	RAPGEF2	0.335202	CD200R1	0.462748
THC2701748	0.42	KIF26A	0.335202	IQCF1	0.462648
RIF1	0.42	PUS7L	0.335141	LGALS9C	0.462303
AK127309	0.42	HIST1H4B	0.335062	42796	0.46206
SOCS5	0.42	HNRNPAB	0.33504	TUBB3	0.462008
LRRC1	0.42	LINC01068	0.334952	IDUA	0.461557
AB073896	0.42	TEP1	0.334899	PCAT7	0.461537
BLOC1S2	0.42	MIR4432HG	0.334863	BPIFC	0.461401
BRP44L	0.42	ZBTB37	0.334764	VPS52	0.461071
A_24_P936393	0.42	LGI1	0.334628	LOC100270804	0.461003
DOPEY1	0.42	LOC101929524	0.334597	TRANK1	0.460995
UBXD6	0.42	IK	0.334501	PADI1	0.460832
SETDB2	0.42	PLAGL2	0.334417	LCA5	0.460385
FAM152A	0.42	IBA57	0.334311	ABCC10	0.460191
DDX10	0.42	TBX5	0.334301	FRS3	0.460094
C1orf150	0.42	BEX1	0.334039	IQCD	0.459804
SAR1A	0.42	SH3KBP1	0.334001	BCL2L2-PABPN1	0.459425
U79301	0.42	KIAA1024L	0.333959	CYP2C9	0.459267
THC2662244	0.42	RBM28	0.333841	TTTY22	0.459168
ENST00000357491	0.42	NODAL	0.333729	TBK1	0.45913
ZNF600	0.42	KCNS1	0.333692	SMIM15-AS1	0.458913
BX116997	0.42	KMT2D	0.333657	LOC340512	0.458587
SCD5	0.42	LOC101927196	0.333586	GPR176	0.458465
MYB	0.42	CRYBA2	0.333586	FAIM2	0.457761
CEP152	0.42	ADRA2A	0.333586	LINC02369	0.457554
THC2733316	0.42	SMAD5-AS1	0.333586	PARM1	0.456506
AL713714	0.42	CCT6B	0.333512	NRSN2-AS1	0.456247
C6orf182	0.42	MATR3	0.333455	ERBB3	0.455787
EREG	0.42	IGFL3	0.333244	KCNJ2	0.455421
SPTY2D1	0.42	LINC02209	0.332965	TAPBPL	0.454457
BUB1	0.42	UBXN2A	0.33276	TXNRD3	0.454065
ZNF354B	0.42	LINC01347	0.332491	MUC21	0.453938
ARID5B	0.42	NIPA2	0.332371	AMN1	0.453837
THC2617099	0.42	FAM83F	0.332202	C9orf129	0.453639
ENY2	0.42	GIGYF2	0.33218	ANXA13	0.453485
THC2682319	0.42	LINC00221	0.332094	NDUFC1	0.453284
AK026485	0.42	CCNE2	0.331909	SPINK4	0.453113
E2F8	0.42	IPW	0.331799	RBM46	0.452889
UTP14C	0.42	ERCC4	0.33167	CAV3	0.452851
FAM63B	0.42	WDSUB1	0.331588	PIK3R5	0.45159
AHSA2	0.42	MANEA	0.331438	CD160	0.451313
A_32_P198647	0.42	HERPUD1	0.331334	COPZ2	0.451062
CBLB	0.42	ERMN	0.331316	LINC02145	0.451001
CENPC1	0.42	EIF3E	0.331302	SEC31B	0.450763
AK129879	0.42	MFSD14A	0.331225	LOC101928093	0.450745
TIA1	0.42	SEC62	0.33122	LOC101927211	0.450646
T98731	0.42	RFTN1	0.331208	ADGRG4	0.45049
ERAP1	0.42	PKN3	0.331155	CAGE1	0.450175
FOXN3	0.42	EIF3J	0.330891	DUOX1	0.450031
BIRC6	0.42	ATP11AUN	0.330873	LOC105274304	0.449953
LIN28B	0.42	SPARC	0.33081	NPIPB11	0.449868
SIRT4	0.42	MAPKAPK5	0.330597	LOC100132111	0.449864
ITFG1	0.42	SNX13	0.330435	WBSCR28	0.449752
ZNF160	0.42	CXCL8	0.330401	LOC101927476	0.449356
EIF3E	0.42	ZNF483	0.330324	RAB30-AS1	0.449073
AK095904	0.42	SLC19A2	0.330308	LIMD1-AS1	0.449064
THC2526402	0.42	SPATA7	0.330263	PRH1	0.448833
BX393727	0.42	FHDC1	0.330148	GACAT1	0.448044
ANKRD28	0.42	CYCS	0.330119	BRICD5	0.447951
TRAK2	0.42	LINC00668	0.330113	SCN2A	0.447712
ENST00000382649	0.42	EPC2	0.329837	ZNF157	0.447655
USP1	0.41	PSMC3IP	0.329823	FSTL1	0.447336
ANKK1	0.41	MAGEA9B	0.329787	COL6A2	0.447311
THC2750143	0.41	DDX52	0.329751	TRIM63	0.447248
ENST00000397057	0.41	ITM2C	0.329705	LOC101929224	0.446999
THC2560976	0.41	CCNK	0.329672	ZNF713	0.446638
FNDC3A	0.41	EFNB2	0.329635	CRTAM	0.446592
LOC730101	0.41	RIBC2	0.3296	CPA5	0.446367
ZNF224	0.41	DDX59	0.329581	LINC02078	0.446295
PRKD3	0.41	SLC37A1	0.329525	LINC00571	0.445847
ITGAV	0.41	UTP20	0.329454	BAMBI	0.445703
CBX3	0.41	TMEM43	0.329421	TMEM9B-AS1	0.445456
ZNF440	0.41	DEK	0.329392	IQSEC2	0.445234
ATG2B	0.41	HMGB2	0.329361	CLCN6	0.444845
THC2758094	0.41	ACVR2B	0.329352	NIPAL1	0.44472
LOC100132086	0.41	SNHG6	0.328913	JAKMIP2-AS1	0.444349
LMO7	0.41	LOC101929709	0.32884	TXNDC2	0.444085
AB019564	0.41	SLC25A36	0.328729	SEC61A1	0.444014
TMEM86A	0.41	NCAPG	0.328702	COL1A1	0.443943
A_24_P944402	0.41	MOBP	0.328251	HERC6	0.443508
A_24_P153234	0.41	AP3M2	0.328114	FKBP1B	0.443459
BMPR2	0.41	GIPC2	0.327923	SLC17A3	0.443363
NBPF10	0.41	NOS1AP	0.327783	CITED1	0.442836
THC2718728	0.41	ARID4B	0.327535	CDHR1	0.44259
OTUD4	0.41	LOC100507351	0.327112	CELSR3-AS1	0.442586
C9orf6	0.41	H2AFY2	0.327045	TSPAN6	0.442583
CRISP3	0.41	IWS1	0.326962	TMEM71	0.442384
HEATR3	0.41	NDUFA9	0.326932	RNF123	0.442288
ZBED5	0.41	OR8D2	0.326823	LINC00282	0.442188
TPD52	0.41	ABCA8	0.326601	NPTX1	0.442053
MYNN	0.41	UEVLD	0.326577	ADAMTSL5	0.441992
TMEM16F	0.41	SYT7	0.326426	ADAMTSL2	0.441945
TRAM1	0.41	LOC102467226	0.326223	CASC20	0.441702
LOC283658	0.41	NEFH	0.326122	LYZL6	0.441466
SAMD4A	0.41	ZNF382	0.326114	CHTF8	0.441353
SOBP	0.41	ZNF281	0.326096	OSMR	0.441121
[truncated: 28,409 more rows]

## Sheet: Supplementary Table 6
Supplementary Table 6. MOLM13 Gene Set Enrichment Analysis positively enriched (upregulated) (p value< 0.05, FDR<0.2)
NAME	GS<br> follow link to MSigDB	GS DETAILS	SIZE	ES	NES	NOM p-val	FDR q-val	FWER p-val	RANK AT MAX	LEADING EDGE
DACOSTA_UV_RESPONSE_VIA_ERCC3_COMMON_DN	DACOSTA_UV_RESPONSE_VIA_ERCC3_COMMON_DN	Details ...	460	0.215626	5.32518	0	0	0	12734	tags=86%, list=65%, signal=240%
MIDDLECDS_CLIP_CHIP_MSI1	MIDDLECDS_CLIP_CHIP_MSI1	Details ...	305	0.191296	3.90672	0	0	0	13968	tags=90%, list=71%, signal=310%
CONCANNON_APOPTOSIS_BY_EPOXOMICIN_UP	CONCANNON_APOPTOSIS_BY_EPOXOMICIN_UP	Details ...	224	0.200347	3.49336	0	0	0	11070	tags=76%, list=57%, signal=174%
WANG_LMO4_TARGETS_DN	WANG_LMO4_TARGETS_DN	Details ...	310	0.161663	3.34086	0	0	0	14887	tags=92%, list=76%, signal=377%
HORIUCHI_WTAP_TARGETS_UP	HORIUCHI_WTAP_TARGETS_UP	Details ...	263	0.177127	3.33967	0	0	0	7597	tags=56%, list=39%, signal=91%
CHEN_HOXA5_TARGETS_9HR_UP	CHEN_HOXA5_TARGETS_9HR_UP	Details ...	201	0.19488	3.1864	0	0	0	13564	tags=89%, list=69%, signal=285%
DUTERTRE_ESTRADIOL_RESPONSE_24HR_DN	DUTERTRE_ESTRADIOL_RESPONSE_24HR_DN	Details ...	464	0.129056	3.17355	0	0	0	10193	tags=65%, list=52%, signal=132%
ALL_MSI1_BS	ALL_MSI1_BS	Details ...	299	0.156566	3.17308	0	0	0	13812	tags=86%, list=71%, signal=287%
DACOSTA_UV_RESPONSE_VIA_ERCC3_XPCS_DN	DACOSTA_UV_RESPONSE_VIA_ERCC3_XPCS_DN	Details ...	80	0.290588	3.08263	0	0	0	11222	tags=86%, list=57%, signal=201%
GABRIELY_MIR21_TARGETS	GABRIELY_MIR21_TARGETS	Details ...	262	0.164277	3.019	0	0.000243854	0.003	13194	tags=84%, list=67%, signal=253%
ZHOU_INFLAMMATORY_RESPONSE_FIMA_UP	ZHOU_INFLAMMATORY_RESPONSE_FIMA_UP	Details ...	431	0.126739	2.97481	0	0.000369261	0.005	13020	tags=79%, list=66%, signal=230%
WARTERS_IR_RESPONSE_5GY	WARTERS_IR_RESPONSE_5GY	Details ...	38	0.404481	2.94912	0	0.000405447	0.006	6523	tags=74%, list=33%, signal=110%
DEBIASI_APOPTOSIS_BY_REOVIRUS_INFECTION_UP	DEBIASI_APOPTOSIS_BY_REOVIRUS_INFECTION_UP	Details ...	288	0.138596	2.69853	0	0.00436748	0.068	12760	tags=79%, list=65%, signal=223%
REACTOME_GPCR_LIGAND_BINDING	REACTOME_GPCR_LIGAND_BINDING	Details ...	297	0.135353	2.68428	0	0.00440681	0.074	4180	tags=35%, list=21%, signal=43%
PODAR_RESPONSE_TO_ADAPHOSTIN_UP	PODAR_RESPONSE_TO_ADAPHOSTIN_UP	Details ...	131	0.197167	2.60837	0	0.00698822	0.123	11860	tags=80%, list=61%, signal=202%
GHANDHI_DIRECT_IRRADIATION_UP	GHANDHI_DIRECT_IRRADIATION_UP	Details ...	89	0.234494	2.57659	0	0.00858895	0.157	9950	tags=74%, list=51%, signal=150%
THUM_SYSTOLIC_HEART_FAILURE_DN	THUM_SYSTOLIC_HEART_FAILURE_DN	Details ...	206	0.150032	2.57483	0	0.00817908	0.159	13918	tags=86%, list=71%, signal=294%
ZHOU_INFLAMMATORY_RESPONSE_LIVE_UP	ZHOU_INFLAMMATORY_RESPONSE_LIVE_UP	Details ...	399	0.109021	2.56695	0	0.00799427	0.165	12877	tags=76%, list=66%, signal=219%
SMIRNOV_RESPONSE_TO_IR_6HR_UP	SMIRNOV_RESPONSE_TO_IR_6HR_UP	Details ...	144	0.180225	2.49759	0	0.0138861	0.282	8327	tags=60%, list=43%, signal=104%
GARGALOVIC_RESPONSE_TO_OXIDIZED_PHOSPHOLIPIDS_MAGENTA_UP	GARGALOVIC_RESPONSE_TO_OXIDIZED_PHOSPHOLIPIDS_MAGENTA_UP	Details ...	26	0.399326	2.48834	0	0.0140951	0.295	10266	tags=92%, list=52%, signal=194%
WANG_RESPONSE_TO_GSK3_INHIBITOR_SB216763_UP	WANG_RESPONSE_TO_GSK3_INHIBITOR_SB216763_UP	Details ...	307	0.122367	2.46587	0.00212314	0.0158208	0.331	14289	tags=85%, list=73%, signal=310%
IVANOVA_HEMATOPOIESIS_STEM_CELL	IVANOVA_HEMATOPOIESIS_STEM_CELL	Details ...	224	0.138923	2.4482	0	0.0173114	0.371	11822	tags=74%, list=60%, signal=185%
TAKEDA_TARGETS_OF_NUP98_HOXA9_FUSION_3D_UP	TAKEDA_TARGETS_OF_NUP98_HOXA9_FUSION_3D_UP	Details ...	158	0.166586	2.44226	0	0.0173742	0.384	7794	tags=56%, list=40%, signal=93%
REACTOME_CLASS_A1_RHODOPSIN_LIKE_RECEPTORS	REACTOME_CLASS_A1_RHODOPSIN_LIKE_RECEPTORS	Details ...	207	0.146632	2.43896	0	0.0171563	0.396	5483	tags=43%, list=28%, signal=58%
ZHOU_INFLAMMATORY_RESPONSE_LPS_UP	ZHOU_INFLAMMATORY_RESPONSE_LPS_UP	Details ...	336	0.117169	2.43513	0.00205339	0.017021	0.405	11382	tags=70%, list=58%, signal=163%
SENESE_HDAC3_TARGETS_UP	SENESE_HDAC3_TARGETS_UP	Details ...	438	0.100469	2.42883	0	0.0173996	0.429	14037	tags=82%, list=72%, signal=281%
SMIRNOV_RESPONSE_TO_IR_2HR_UP	SMIRNOV_RESPONSE_TO_IR_2HR_UP	Details ...	47	0.291244	2.40105	0.00207039	0.020632	0.498	9309	tags=77%, list=48%, signal=146%
CREIGHTON_ENDOCRINE_THERAPY_RESISTANCE_5	CREIGHTON_ENDOCRINE_THERAPY_RESISTANCE_5	Details ...	416	0.102072	2.38411	0	0.0225409	0.54	15366	tags=88%, list=78%, signal=402%
NABA_SECRETED_FACTORS	NABA_SECRETED_FACTORS	Details ...	263	0.122915	2.36346	0	0.0257187	0.597	3730	tags=31%, list=19%, signal=38%
ST_WNT_CA2_CYCLIC_GMP_PATHWAY	ST_WNT_CA2_CYCLIC_GMP_PATHWAY	Details ...	20	0.434121	2.36133	0.00201613	0.0254834	0.608	9131	tags=90%, list=47%, signal=168%
HSCVSCMP_UP	HSCVSCMP_UP	Details ...	209	0.137466	2.3565	0	0.025677	0.625	12796	tags=79%, list=65%, signal=225%
MITSIADES_RESPONSE_TO_APLIDIN_UP	MITSIADES_RESPONSE_TO_APLIDIN_UP	Details ...	394	0.104719	2.35442	0	0.0252791	0.632	13646	tags=80%, list=70%, signal=258%
CHIANG_LIVER_CANCER_SUBCLASS_UNANNOTATED_UP	CHIANG_LIVER_CANCER_SUBCLASS_UNANNOTATED_UP	Details ...	70	0.235607	2.34823	0	0.0255712	0.652	11068	tags=80%, list=57%, signal=183%
WARTERS_RESPONSE_TO_IR_SKIN	WARTERS_RESPONSE_TO_IR_SKIN	Details ...	67	0.249798	2.33506	0	0.0270824	0.695	6523	tags=58%, list=33%, signal=87%
MASSARWEH_TAMOXIFEN_RESISTANCE_UP	MASSARWEH_TAMOXIFEN_RESISTANCE_UP	Details ...	498	0.0895697	2.30321	0	0.0322476	0.759	13547	tags=78%, list=69%, signal=246%
BILD_CTNNB1_ONCOGENIC_SIGNATURE	BILD_CTNNB1_ONCOGENIC_SIGNATURE	Details ...	75	0.227224	2.29056	0	0.0340411	0.787	14366	tags=96%, list=73%, signal=359%
RAF1_UP_CREIGHTON	RAF1_UP_CREIGHTON	Details ...	428	0.0964939	2.28799	0	0.0336254	0.79	16178	tags=92%, list=83%, signal=518%
ZHANG_RESPONSE_TO_IKK_INHIBITOR_AND_TNF_UP	ZHANG_RESPONSE_TO_IKK_INHIBITOR_AND_TNF_UP	Details ...	196	0.136556	2.2867	0	0.0329582	0.793	9541	tags=62%, list=49%, signal=120%
MSI2_SHRNA_UP	MSI2_SHRNA_UP	Details ...	139	0.165372	2.2776	0	0.0340715	0.813	14535	tags=91%, list=74%, signal=349%
MONNIER_POSTRADIATION_TUMOR_ESCAPE_UP	MONNIER_POSTRADIATION_TUMOR_ESCAPE_UP	Details ...	364	0.101171	2.24984	0.00199601	0.0401058	0.871	16992	tags=97%, list=87%, signal=717%
BOSCO_EPITHELIAL_DIFFERENTIATION_MODULE	BOSCO_EPITHELIAL_DIFFERENTIATION_MODULE	Details ...	55	0.253498	2.22168	0.00197628	0.0467884	0.915	3594	tags=44%, list=18%, signal=53%
DEBOSSCHER_NFKB_TARGETS_REPRESSED_BY_GLUCOCORTICOIDS	DEBOSSCHER_NFKB_TARGETS_REPRESSED_BY_GLUCOCORTICOIDS	Details ...	15	0.46343	2.21808	0.00397614	0.046928	0.919	6597	tags=80%, list=34%, signal=121%
HSCVSGMP_UP	HSCVSGMP_UP	Details ...	307	0.1082	2.19753	0.00393701	0.0522634	0.945	12776	tags=76%, list=65%, signal=215%
REACTOME_GENERIC_TRANSCRIPTION_PATHWAY	REACTOME_GENERIC_TRANSCRIPTION_PATHWAY	Details ...	309	0.108214	2.19463	0	0.0521649	0.948	13060	tags=77%, list=67%, signal=229%
PILON_KLF1_TARGETS_UP	PILON_KLF1_TARGETS_UP	Details ...	447	0.0901877	2.19192	0.00198413	0.0519469	0.951	14439	tags=83%, list=74%, signal=307%
ZWANG_CLASS_1_TRANSIENTLY_INDUCED_BY_EGF	ZWANG_CLASS_1_TRANSIENTLY_INDUCED_BY_EGF	Details ...	444	0.0917636	2.17963	0	0.0556386	0.961	10019	tags=60%, list=51%, signal=120%
JI_METASTASIS_REPRESSED_BY_STK11	JI_METASTASIS_REPRESSED_BY_STK11	Details ...	23	0.37989	2.17212	0.00601202	0.0571496	0.967	3637	tags=57%, list=19%, signal=69%
KEGG_CYTOKINE_CYTOKINE_RECEPTOR_INTERACTION	KEGG_CYTOKINE_CYTOKINE_RECEPTOR_INTERACTION	Details ...	205	0.131548	2.17024	0	0.0565029	0.97	3277	tags=30%, list=17%, signal=35%
MEISSNER_NPC_HCP_WITH_H3_UNMETHYLATED	MEISSNER_NPC_HCP_WITH_H3_UNMETHYLATED	Details ...	448	0.0874167	2.13892	0	0.0678838	0.988	3834	tags=28%, list=20%, signal=34%
DEURIG_T_CELL_PROLYMPHOCYTIC_LEUKEMIA_DN	DEURIG_T_CELL_PROLYMPHOCYTIC_LEUKEMIA_DN	Details ...	272	0.110516	2.13301	0.00204082	0.0687546	0.993	14136	tags=83%, list=72%, signal=295%
PID_CDC42_PATHWAY	PID_CDC42_PATHWAY		65	0.227556	2.13212	0.00603622	0.0677103	0.993	14538	tags=97%, list=74%, signal=375%
DACOSTA_UV_RESPONSE_VIA_ERCC3_TTD_DN	DACOSTA_UV_RESPONSE_VIA_ERCC3_TTD_DN		78	0.207292	2.1317	0	0.0665963	0.993	12526	tags=85%, list=64%, signal=234%
SMID_BREAST_CANCER_LUMINAL_B_DN	SMID_BREAST_CANCER_LUMINAL_B_DN		474	0.0859838	2.13087	0.00612245	0.0657229	0.993	4016	tags=29%, list=21%, signal=35%
SOMERVAILLE.HIGHLSC_DN	SOMERVAILLE.HIGHLSC_DN		225	0.122605	2.12422	0.00201207	0.0672418	0.993	15729	tags=92%, list=80%, signal=464%
NUSSE_WNT_UP_TARGETS	NUSSE_WNT_UP_TARGETS		60	0.229865	2.12084	0	0.0674525	0.994	6282	tags=55%, list=32%, signal=81%
BCATENIN_BILD	BCATENIN_BILD		47	0.255859	2.10639	0.0060241	0.0728335	0.995	6667	tags=60%, list=34%, signal=90%
BIOCARTA_MET_PATHWAY	BIOCARTA_MET_PATHWAY		37	0.288829	2.09553	0	0.0765608	0.996	12878	tags=95%, list=66%, signal=276%
GARGALOVIC_RESPONSE_TO_OXIDIZED_PHOSPHOLIPIDS_YELLOW_UP	GARGALOVIC_RESPONSE_TO_OXIDIZED_PHOSPHOLIPIDS_YELLOW_UP		29	0.325544	2.07975	0.00201207	0.0826415	0.997	5113	tags=59%, list=26%, signal=79%
ZWANG_CLASS_3_TRANSIENTLY_INDUCED_BY_EGF	ZWANG_CLASS_3_TRANSIENTLY_INDUCED_BY_EGF		203	0.125075	2.07589	0.00840336	0.0832804	0.999	8283	tags=55%, list=42%, signal=94%
ODONNELL_TFRC_TARGETS_UP	ODONNELL_TFRC_TARGETS_UP		348	0.097685	2.06678	0.00200401	0.0866326	0.999	11513	tags=68%, list=59%, signal=163%
PID_P53_DOWNSTREAM_PATHWAY	PID_P53_DOWNSTREAM_PATHWAY		123	0.159953	2.06674	0.00612245	0.0852124	0.999	6439	tags=49%, list=33%, signal=72%
SHEN_SMARCA2_TARGETS_DN	SHEN_SMARCA2_TARGETS_DN		284	0.105715	2.06585	0.00382409	0.0841273	0.999	5199	tags=37%, list=27%, signal=50%
NAKAMURA_ADIPOGENESIS_EARLY_DN	NAKAMURA_ADIPOGENESIS_EARLY_DN		35	0.300457	2.05849	0.00190114	0.0868665	0.999	7554	tags=69%, list=39%, signal=111%
REACTOME_PEPTIDE_LIGAND_BINDING_RECEPTORS	REACTOME_PEPTIDE_LIGAND_BINDING_RECEPTORS		126	0.156344	2.03945	0.0083682	0.0965497	0.999	2863	tags=30%, list=15%, signal=35%
REACTOME_MEMBRANE_TRAFFICKING	REACTOME_MEMBRANE_TRAFFICKING		111	0.163359	2.03493	0.0075188	0.09759	0.999	14284	tags=89%, list=73%, signal=328%
NICK_RESPONSE_TO_PROC_TREATMENT_DN	NICK_RESPONSE_TO_PROC_TREATMENT_DN		25	0.333421	2.02004	0.00413223	0.105219	0.999	10711	tags=88%, list=55%, signal=194%
ENK_UV_RESPONSE_EPIDERMIS_DN	ENK_UV_RESPONSE_EPIDERMIS_DN		464	0.0824969	2.01603	0.0120724	0.105877	0.999	14966	tags=84%, list=76%, signal=350%
REACTOME_TRAF6_MEDIATED_IRF7_ACTIVATION	REACTOME_TRAF6_MEDIATED_IRF7_ACTIVATION		18	0.403336	2.01529	0.00990099	0.104712	0.999	6251	tags=72%, list=32%, signal=106%
BHAT_ESR1_TARGETS_NOT_VIA_AKT1_DN	BHAT_ESR1_TARGETS_NOT_VIA_AKT1_DN		84	0.187387	2.00959	0.00970874	0.106657	0.999	10333	tags=71%, list=53%, signal=151%
KERLEY_RESPONSE_TO_CISPLATIN_UP	KERLEY_RESPONSE_TO_CISPLATIN_UP		41	0.26155	2.0037	0.00580271	0.109184	0.999	6351	tags=59%, list=32%, signal=86%
BAELDE_DIABETIC_NEPHROPATHY_DN	BAELDE_DIABETIC_NEPHROPATHY_DN		402	0.0851678	2.00124	0.00584795	0.10934	0.999	13418	tags=77%, list=69%, signal=239%
BROWNE_HCMV_INFECTION_20HR_UP	BROWNE_HCMV_INFECTION_20HR_UP		218	0.119578	2.00049	0.01	0.108432	0.999	13763	tags=82%, list=70%, signal=273%
TONKS_TARGETS_OF_RUNX1_RUNX1T1_FUSION_HSC_UP	TONKS_TARGETS_OF_RUNX1_RUNX1T1_FUSION_HSC_UP		170	0.129731	1.99665	0.0120482	0.109576	0.999	7848	tags=53%, list=40%, signal=88%
SENGUPTA_NASOPHARYNGEAL_CARCINOMA_WITH_LMP1_DN	SENGUPTA_NASOPHARYNGEAL_CARCINOMA_WITH_LMP1_DN		141	0.144243	1.9962	0.00590551	0.108369	0.999	7750	tags=54%, list=40%, signal=89%
ZHANG_RESPONSE_TO_CANTHARIDIN_UP	ZHANG_RESPONSE_TO_CANTHARIDIN_UP		17	0.39513	1.98353	0.00621118	0.114673	0.999	9547	tags=88%, list=49%, signal=172%
RAO_BOUND_BY_SALL4_ISOFORM_A	RAO_BOUND_BY_SALL4_ISOFORM_A		138	0.147335	1.98343	0.00590551	0.113238	0.999	12318	tags=78%, list=63%, signal=208%
PID_RAC1_PATHWAY	PID_RAC1_PATHWAY		50	0.238178	1.98295	0.00811359	0.112022	0.999	14538	tags=98%, list=74%, signal=379%
WIEDERSCHAIN_TARGETS_OF_BMI1_AND_PCGF2	WIEDERSCHAIN_TARGETS_OF_BMI1_AND_PCGF2		55	0.222209	1.97433	0.0019084	0.116552	0.999	10614	tags=76%, list=54%, signal=166%
MIKKELSEN_MCV6_LCP_WITH_H3K27ME3	MIKKELSEN_MCV6_LCP_WITH_H3K27ME3		19	0.369957	1.96144	0.004	0.12464	1	3068	tags=53%, list=16%, signal=62%
MARTINEZ_RESPONSE_TO_TRABECTEDIN	MARTINEZ_RESPONSE_TO_TRABECTEDIN		47	0.241913	1.95567	0.00819672	0.127275	1	13606	tags=94%, list=69%, signal=306%
SESTO_RESPONSE_TO_UV_C2	SESTO_RESPONSE_TO_UV_C2		52	0.230435	1.95159	0.010142	0.128933	1	11692	tags=83%, list=60%, signal=205%
REACTOME_INTERACTION_BETWEEN_L1_AND_ANKYRINS	REACTOME_INTERACTION_BETWEEN_L1_AND_ANKYRINS		21	0.355553	1.94597	0.00919118	0.131871	1	6099	tags=67%, list=31%, signal=97%
TING_SILENCED_BY_DICER	TING_SILENCED_BY_DICER		27	0.321678	1.94361	0.0103306	0.132135	1	5313	tags=59%, list=27%, signal=81%
GARGALOVIC_RESPONSE_TO_OXIDIZED_PHOSPHOLIPIDS_BLUE_UP	GARGALOVIC_RESPONSE_TO_OXIDIZED_PHOSPHOLIPIDS_BLUE_UP		114	0.158203	1.94178	0.00631579	0.132053	1	7054	tags=52%, list=36%, signal=80%
LEIN_NEURON_MARKERS	LEIN_NEURON_MARKERS		63	0.214515	1.94002	0.00828157	0.131675	1	8867	tags=67%, list=45%, signal=121%
UROSEVIC_RESPONSE_TO_IMIQUIMOD	UROSEVIC_RESPONSE_TO_IMIQUIMOD		20	0.362769	1.93978	0.00779727	0.130295	1	11506	tags=95%, list=59%, signal=230%
BROWNE_HCMV_INFECTION_16HR_UP	BROWNE_HCMV_INFECTION_16HR_UP		212	0.111589	1.93945	0.00197239	0.129002	1	14095	tags=83%, list=72%, signal=293%
LIU_PROSTATE_CANCER_DN	LIU_PROSTATE_CANCER_DN		426	0.0801926	1.92573	0.011976	0.138425	1	10139	tags=60%, list=52%, signal=121%
PID_ERBB_NETWORK_PATHWAY	PID_ERBB_NETWORK_PATHWAY		15	0.403332	1.92073	0.004	0.14101	1	7773	tags=80%, list=40%, signal=133%
CHANG_CORE_SERUM_RESPONSE_DN	CHANG_CORE_SERUM_RESPONSE_DN		182	0.12445	1.9193	0.00202429	0.140645	1	11142	tags=69%, list=57%, signal=159%
HUTTMANN_B_CLL_POOR_SURVIVAL_DN	HUTTMANN_B_CLL_POOR_SURVIVAL_DN		55	0.216442	1.91244	0.00200401	0.144819	1	13219	tags=89%, list=68%, signal=273%
PID_TAP63_PATHWAY	PID_TAP63_PATHWAY		51	0.229176	1.90713	0.018711	0.147532	1	9730	tags=73%, list=50%, signal=144%
REACTOME_SIGNALING_BY_THE_B_CELL_RECEPTOR_BCR	REACTOME_SIGNALING_BY_THE_B_CELL_RECEPTOR_BCR		117	0.147706	1.9014	0.0059761	0.150562	1	15033	tags=91%, list=77%, signal=391%
RASHI_NFKB1_TARGETS	RASHI_NFKB1_TARGETS		19	0.363229	1.8987	0.011811	0.151233	1	5261	tags=63%, list=27%, signal=86%
DOUGLAS_BMI1_TARGETS_DN	DOUGLAS_BMI1_TARGETS_DN		286	0.0957105	1.89798	0.0117647	0.150213	1	14243	tags=82%, list=73%, signal=297%
SENGUPTA_NASOPHARYNGEAL_CARCINOMA_WITH_LMP1_UP	SENGUPTA_NASOPHARYNGEAL_CARCINOMA_WITH_LMP1_UP		364	0.0861563	1.89107	0.00612245	0.154887	1	14214	tags=81%, list=73%, signal=290%
GARGALOVIC_RESPONSE_TO_OXIDIZED_PHOSPHOLIPIDS_TURQUOISE_UP	GARGALOVIC_RESPONSE_TO_OXIDIZED_PHOSPHOLIPIDS_TURQUOISE_UP		74	0.187961	1.89057	0.00583658	0.153818	1	10887	tags=74%, list=56%, signal=167%
DAVICIONI_MOLECULAR_ARMS_VS_ERMS_UP	DAVICIONI_MOLECULAR_ARMS_VS_ERMS_UP		304	0.0963513	1.88398	0.0182186	0.157938	1	16114	tags=92%, list=82%, signal=510%
REACTOME_AXON_GUIDANCE	REACTOME_AXON_GUIDANCE		236	0.103879	1.88256	0.013308	0.15752	1	14668	tags=85%, list=75%, signal=335%
NABA_ECM_REGULATORS	NABA_ECM_REGULATORS		217	0.110212	1.87923	0.00798403	0.159046	1	3911	tags=31%, list=20%, signal=38%
AMIT_SERUM_RESPONSE_240_MCF10A	AMIT_SERUM_RESPONSE_240_MCF10A		50	0.223847	1.87875	0.00809717	0.157874	1	11293	tags=80%, list=58%, signal=188%
REACTOME_LIPOPROTEIN_METABOLISM	REACTOME_LIPOPROTEIN_METABOLISM		27	0.303612	1.87559	0.0132075	0.158932	1	4941	tags=56%, list=25%, signal=74%
REACTOME_ACYL_CHAIN_REMODELLING_OF_PE	REACTOME_ACYL_CHAIN_REMODELLING_OF_PE		18	0.383147	1.87303	0.0101833	0.159528	1	6646	tags=72%, list=34%, signal=109%
BRUINS_UVC_RESPONSE_VIA_TP53_GROUP_D	BRUINS_UVC_RESPONSE_VIA_TP53_GROUP_D		233	0.104751	1.87107	0.00986193	0.159682	1	10327	tags=63%, list=53%, signal=132%
CHUANG_OXIDATIVE_STRESS_RESPONSE_UP	CHUANG_OXIDATIVE_STRESS_RESPONSE_UP		24	0.318688	1.86478	0.0101626	0.163818	1	9269	tags=79%, list=47%, signal=150%
JAATINEN_HEMATOPOIETIC_STEM_CELL_DN	JAATINEN_HEMATOPOIETIC_STEM_CELL_DN		198	0.112397	1.86423	0.0181087	0.162755	1	3161	tags=27%, list=16%, signal=32%
BROWNE_INTERFERON_RESPONSIVE_GENES	BROWNE_INTERFERON_RESPONSIVE_GENES		58	0.204408	1.85671	0.0135135	0.167926	1	10864	tags=76%, list=55%, signal=170%
REACTOME_SIGNALING_BY_ERBB4	REACTOME_SIGNALING_BY_ERBB4		81	0.175879	1.85628	0.00790514	0.16668	1	12042	tags=79%, list=61%, signal=204%
PID_PDGFRB_PATHWAY	PID_PDGFRB_PATHWAY		126	0.141651	1.85625	0.00938086	0.165188	1	14650	tags=89%, list=75%, signal=351%
REACTOME_ANTIGEN_PROCESSING_UBIQUITINATION_PROTEASOME_DEGRADATION	REACTOME_ANTIGEN_PROCESSING_UBIQUITINATION_PROTEASOME_DEGRADATION		185	0.117844	1.85386	0.0105042	0.165897	1	14438	tags=85%, list=74%, signal=322%
BIOCARTA_TGFB_PATHWAY	BIOCARTA_TGFB_PATHWAY		18	0.361056	1.85227	0.0245399	0.166019	1	11430	tags=94%, list=58%, signal=227%
OHGUCHI_LIVER_HNF4A_TARGETS_DN	OHGUCHI_LIVER_HNF4A_TARGETS_DN		118	0.146828	1.84624	0.011583	0.169884	1	4941	tags=40%, list=25%, signal=53%
KEGG_ENDOCYTOSIS	KEGG_ENDOCYTOSIS		169	0.122081	1.8449	0.0155642	0.16956	1	11534	tags=71%, list=59%, signal=171%
PID_ANTHRAX_PATHWAY	PID_ANTHRAX_PATHWAY		16	0.385343	1.8406	0.02079	0.172091	1	12042	tags=100%, list=61%, signal=259%
MIKKELSEN_MEF_ICP_WITH_H3K27ME3	MIKKELSEN_MEF_ICP_WITH_H3K27ME3		172	0.1228	1.8405	0.0142276	0.170672	1	6496	tags=45%, list=33%, signal=67%
PID_TRKR_PATHWAY	PID_TRKR_PATHWAY		62	0.199858	1.83909	0.0223124	0.170489	1	14733	tags=95%, list=75%, signal=383%
SENESE_HDAC1_TARGETS_UP	SENESE_HDAC1_TARGETS_UP		403	0.0796826	1.8389	0.0117647	0.169177	1	15867	tags=89%, list=81%, signal=459%
KATSANOU_ELAVL1_TARGETS_UP	KATSANOU_ELAVL1_TARGETS_UP		143	0.129354	1.83241	0.0115385	0.173821	1	8166	tags=55%, list=42%, signal=93%
VALK_AML_CLUSTER_7	VALK_AML_CLUSTER_7		26	0.297718	1.82709	0.0165631	0.177484	1	7734	tags=69%, list=39%, signal=114%
KEGG_NEUROACTIVE_LIGAND_RECEPTOR_INTERACTION	KEGG_NEUROACTIVE_LIGAND_RECEPTOR_INTERACTION		219	0.105493	1.82639	0.00984252	0.17662	1	4931	tags=36%, list=25%, signal=47%
IVANOVA_HEMATOPOIESIS_MATURE_CELL	IVANOVA_HEMATOPOIESIS_MATURE_CELL		250	0.0990723	1.82248	0.0119048	0.178904	1	15865	tags=91%, list=81%, signal=472%
BHAT_ESR1_TARGETS_VIA_AKT1_DN	BHAT_ESR1_TARGETS_VIA_AKT1_DN		77	0.175531	1.82175	0.0163934	0.178169	1	9037	tags=64%, list=46%, signal=118%
REACTOME_SIGNALING_BY_ILS	REACTOME_SIGNALING_BY_ILS		103	0.153561	1.82165	0.00604839	0.1768	1	14119	tags=87%, list=72%, signal=312%
LINSLEY_MIR16_TARGETS	LINSLEY_MIR16_TARGETS		181	0.114908	1.81799	0.0121212	0.178947	1	16487	tags=96%, list=84%, signal=599%
MOSERLE_IFNA_RESPONSE	MOSERLE_IFNA_RESPONSE		26	0.297275	1.81675	0.00965251	0.178848	1	13015	tags=96%, list=66%, signal=286%
HERNANDEZ_ABERRANT_MITOSIS_BY_DOCETACEL_2NM_UP	HERNANDEZ_ABERRANT_MITOSIS_BY_DOCETACEL_2NM_UP		74	0.17777	1.81624	0.0121457	0.177932	1	9498	tags=66%, list=49%, signal=128%
KEGG_ERBB_SIGNALING_PATHWAY	KEGG_ERBB_SIGNALING_PATHWAY		86	0.166176	1.81197	0.0262626	0.180465	1	12471	tags=80%, list=64%, signal=220%
KOBAYASHI_EGFR_SIGNALING_6HR_DN	KOBAYASHI_EGFR_SIGNALING_6HR_DN		17	0.37352	1.81163	0.00583658	0.17931	1	6514	tags=71%, list=33%, signal=106%
LINDSTEDT_DENDRITIC_CELL_MATURATION_A	LINDSTEDT_DENDRITIC_CELL_MATURATION_A		56	0.20359	1.80709	0.0139721	0.182189	1	5815	tags=50%, list=30%, signal=71%
REACTOME_DOWNSTREAM_SIGNALING_EVENTS_OF_B_CELL_RECEPTOR_BCR	REACTOME_DOWNSTREAM_SIGNALING_EVENTS_OF_B_CELL_RECEPTOR_BCR		88	0.164852	1.80626	0.0255906	0.181603	1	15033	tags=93%, list=77%, signal=399%
REACTOME_ACYL_CHAIN_REMODELLING_OF_PC	REACTOME_ACYL_CHAIN_REMODELLING_OF_PC		19	0.345118	1.80384	0.00992064	0.182643	1	6646	tags=68%, list=34%, signal=103%
KEGG_ECM_RECEPTOR_INTERACTION	KEGG_ECM_RECEPTOR_INTERACTION		79	0.174471	1.80346	0.01417	0.18166	1	7751	tags=57%, list=40%, signal=94%
BONOME_OVARIAN_CANCER_SURVIVAL_OPTIMAL_DEBULKING	BONOME_OVARIAN_CANCER_SURVIVAL_OPTIMAL_DEBULKING		215	0.106141	1.80318	0.0200803	0.180526	1	16160	tags=93%, list=83%, signal=526%
BERENJENO_ROCK_SIGNALING_NOT_VIA_RHOA_DN	BERENJENO_ROCK_SIGNALING_NOT_VIA_RHOA_DN		43	0.229924	1.80276	0.0120724	0.179616	1	8258	tags=65%, list=42%, signal=112%
SESTO_RESPONSE_TO_UV_C5	SESTO_RESPONSE_TO_UV_C5		46	0.219217	1.79565	0.01002	0.184892	1	14022	tags=93%, list=72%, signal=328%
WENDT_COHESIN_TARGETS_UP	WENDT_COHESIN_TARGETS_UP		30	0.276184	1.79314	0.0140281	0.186061	1	13529	tags=97%, list=69%, signal=312%
TOOKER_GEMCITABINE_RESISTANCE_DN	TOOKER_GEMCITABINE_RESISTANCE_DN		118	0.140886	1.78973	0.0160966	0.187788	1	15512	tags=93%, list=79%, signal=446%
WANG_CLIM2_TARGETS_DN	WANG_CLIM2_TARGETS_DN		166	0.119843	1.78931	0.0143737	0.186863	1	13362	tags=80%, list=68%, signal=250%
XU_GH1_AUTOCRINE_TARGETS_DN	XU_GH1_AUTOCRINE_TARGETS_DN		126	0.136055	1.78567	0.0156556	0.189154	1	12583	tags=78%, list=64%, signal=216%
KEGG_UBIQUITIN_MEDIATED_PROTEOLYSIS	KEGG_UBIQUITIN_MEDIATED_PROTEOLYSIS		126	0.13292	1.78153	0.019802	0.191792	1	12644	tags=78%, list=65%, signal=218%
TAVAZOIE_METASTASIS	TAVAZOIE_METASTASIS		92	0.158144	1.77593	0.0131332	0.196286	1	9901	tags=66%, list=51%, signal=133%
UZONYI_RESPONSE_TO_LEUKOTRIENE_AND_THROMBIN	UZONYI_RESPONSE_TO_LEUKOTRIENE_AND_THROMBIN		34	0.253494	1.77544	0.0122449	0.195432	1	3683	tags=44%, list=19%, signal=54%
SILIGAN_BOUND_BY_EWS_FLT1_FUSION	SILIGAN_BOUND_BY_EWS_FLT1_FUSION		43	0.229711	1.77489	0.0194932	0.194576	1	9173	tags=70%, list=47%, signal=131%
REACTOME_DEFENSINS	REACTOME_DEFENSINS		26	0.29452	1.7735	0.0162933	0.194736	1	1771	tags=38%, list=9%, signal=42%

## Sheet: Supplementary Table 7
Supplementary Table 7. MOLM13 Gene Set Enrichment Analysis negatively enriched (downregulated) (p value< 0.05, FDR<0.2)
NAME	GS<br> follow link to MSigDB	GS DETAILS	SIZE	ES	NES	NOM p-val	FDR q-val	FWER p-val	RANK AT MAX	LEADING EDGE
HSIAO_HOUSEKEEPING_GENES	HSIAO_HOUSEKEEPING_GENES	Details ...	372	-0.309598	-6.87371	0	0	0	8530	tags=74%, list=44%, signal=128%
WONG_EMBRYONIC_STEM_CELL_CORE	WONG_EMBRYONIC_STEM_CELL_CORE	Details ...	311	-0.32522	-6.65863	0	0	0	10105	tags=84%, list=52%, signal=170%
REACTOME_TRANSLATION	REACTOME_TRANSLATION	Details ...	137	-0.459752	-6.35613	0	0	0	7356	tags=83%, list=38%, signal=132%
RHEIN_ALL_GLUCOCORTICOID_THERAPY_DN	RHEIN_ALL_GLUCOCORTICOID_THERAPY_DN	Details ...	334	-0.285748	-6.03432	0	0	0	10683	tags=83%, list=55%, signal=179%
REACTOME_3_UTR_MEDIATED_TRANSLATIONAL_REGULATION	REACTOME_3_UTR_MEDIATED_TRANSLATIONAL_REGULATION	Details ...	98	-0.516564	-6.01416	0	0	0	6921	tags=87%, list=35%, signal=133%
SPIELMAN_LYMPHOBLAST_EUROPEAN_VS_ASIAN_UP	SPIELMAN_LYMPHOBLAST_EUROPEAN_VS_ASIAN_UP	Details ...	448	-0.236512	-5.79933	0	0	0	10556	tags=77%, list=54%, signal=163%
REACTOME_SRP_DEPENDENT_COTRANSLATIONAL_PROTEIN_TARGETING_TO_MEMBRANE	REACTOME_SRP_DEPENDENT_COTRANSLATIONAL_PROTEIN_TARGETING_TO_MEMBRANE	Details ...	102	-0.48412	-5.6058	0	0	0	7273	tags=85%, list=37%, signal=135%
FEVR_CTNNB1_TARGETS_DN	FEVR_CTNNB1_TARGETS_DN	Details ...	499	-0.215192	-5.55882	0	0	0	12063	tags=83%, list=62%, signal=210%
REACTOME_PEPTIDE_CHAIN_ELONGATION	REACTOME_PEPTIDE_CHAIN_ELONGATION	Details ...	80	-0.528039	-5.54536	0	0	0	6593	tags=86%, list=34%, signal=129%
KEGG_RIBOSOME	KEGG_RIBOSOME	Details ...	82	-0.50467	-5.42283	0	0	0	6399	tags=83%, list=33%, signal=123%
BERENJENO_TRANSFORMED_BY_RHOA_UP	BERENJENO_TRANSFORMED_BY_RHOA_UP	Details ...	495	-0.210958	-5.27552	0	0	0	8990	tags=66%, list=46%, signal=120%
MOOTHA_MITOCHONDRIA	MOOTHA_MITOCHONDRIA	Details ...	403	-0.228749	-5.25563	0	0	0	10969	tags=78%, list=56%, signal=175%
REACTOME_INFLUENZA_VIRAL_RNA_TRANSCRIPTION_AND_REPLICATION	REACTOME_INFLUENZA_VIRAL_RNA_TRANSCRIPTION_AND_REPLICATION	Details ...	95	-0.46564	-5.24919	0	0	0	6593	tags=80%, list=34%, signal=120%
PENG_GLUTAMINE_DEPRIVATION_DN	PENG_GLUTAMINE_DEPRIVATION_DN	Details ...	305	-0.26088	-5.21663	0	0	0	9033	tags=72%, list=46%, signal=131%
HORIUCHI_WTAP_TARGETS_DN	HORIUCHI_WTAP_TARGETS_DN	Details ...	274	-0.262117	-5.14767	0	0	0	10306	tags=78%, list=53%, signal=163%
PUJANA_BRCA2_PCC_NETWORK	PUJANA_BRCA2_PCC_NETWORK	Details ...	390	-0.223634	-5.09872	0	0	0	12982	tags=88%, list=66%, signal=256%
REACTOME_METABOLISM_OF_RNA	REACTOME_METABOLISM_OF_RNA	Details ...	236	-0.284461	-5.03817	0	0	0	8355	tags=71%, list=43%, signal=122%
STARK_PREFRONTAL_CORTEX_22Q11_DELETION_DN	STARK_PREFRONTAL_CORTEX_22Q11_DELETION_DN	Details ...	431	-0.208746	-4.99106	0	0	0	9952	tags=71%, list=51%, signal=142%
BLUM_RESPONSE_TO_SALIRASIB_DN	BLUM_RESPONSE_TO_SALIRASIB_DN	Details ...	319	-0.246151	-4.98399	0	0	0	10238	tags=76%, list=52%, signal=158%
REACTOME_METABOLISM_OF_PROTEINS	REACTOME_METABOLISM_OF_PROTEINS	Details ...	399	-0.216267	-4.95003	0	0	0	12294	tags=84%, list=63%, signal=221%
MOOTHA_HUMAN_MITODB_6_2002	MOOTHA_HUMAN_MITODB_6_2002	Details ...	393	-0.223161	-4.92521	0	0	0	11365	tags=80%, list=58%, signal=187%
SOTIRIOU_BREAST_CANCER_GRADE_1_VS_3_UP	SOTIRIOU_BREAST_CANCER_GRADE_1_VS_3_UP	Details ...	134	-0.357397	-4.8962	0	0	0	10587	tags=90%, list=54%, signal=194%
REACTOME_INFLUENZA_LIFE_CYCLE	REACTOME_INFLUENZA_LIFE_CYCLE	Details ...	128	-0.368918	-4.86108	0	0	0	6593	tags=70%, list=34%, signal=105%
GRADE_COLON_AND_RECTAL_CANCER_UP	GRADE_COLON_AND_RECTAL_CANCER_UP	Details ...	257	-0.256426	-4.845	0	0	0	10666	tags=80%, list=54%, signal=173%
REACTOME_NONSENSE_MEDIATED_DECAY_ENHANCED_BY_THE_EXON_JUNCTION_COMPLEX	REACTOME_NONSENSE_MEDIATED_DECAY_ENHANCED_BY_THE_EXON_JUNCTION_COMPLEX	Details ...	100	-0.410139	-4.82489	0	0	0	7285	tags=78%, list=37%, signal=124%
ZHANG_TLX_TARGETS_60HR_DN	ZHANG_TLX_TARGETS_60HR_DN	Details ...	252	-0.265996	-4.79872	0	0	0	9624	tags=75%, list=49%, signal=146%
REACTOME_METABOLISM_OF_MRNA	REACTOME_METABOLISM_OF_MRNA	Details ...	193	-0.296535	-4.77704	0	0	0	8355	tags=72%, list=43%, signal=124%
LEE_LIVER_CANCER_SURVIVAL_DN	LEE_LIVER_CANCER_SURVIVAL_DN	Details ...	158	-0.316527	-4.73076	0	0	0	10089	tags=83%, list=52%, signal=170%
MANALO_HYPOXIA_DN	MANALO_HYPOXIA_DN	Details ...	260	-0.255368	-4.71023	0	0	0	10281	tags=78%, list=52%, signal=161%
WHITEFORD_PEDIATRIC_CANCER_MARKERS	WHITEFORD_PEDIATRIC_CANCER_MARKERS	Details ...	106	-0.383663	-4.63098	0	0	0	8047	tags=79%, list=41%, signal=134%
KOBAYASHI_EGFR_SIGNALING_24HR_DN	KOBAYASHI_EGFR_SIGNALING_24HR_DN	Details ...	229	-0.272415	-4.61949	0	0	0	10549	tags=81%, list=54%, signal=173%
GOLDRATH_ANTIGEN_RESPONSE	GOLDRATH_ANTIGEN_RESPONSE	Details ...	314	-0.223622	-4.57177	0	0	0	8290	tags=64%, list=42%, signal=110%
ROSTY_CERVICAL_CANCER_PROLIFERATION_CLUSTER	ROSTY_CERVICAL_CANCER_PROLIFERATION_CLUSTER	Details ...	126	-0.335456	-4.5444	0	0	0	8239	tags=75%, list=42%, signal=129%
TARTE_PLASMA_CELL_VS_PLASMABLAST_DN	TARTE_PLASMA_CELL_VS_PLASMABLAST_DN	Details ...	287	-0.231483	-4.53715	0	0	0	11228	tags=80%, list=57%, signal=185%
MITSIADES_RESPONSE_TO_APLIDIN_DN	MITSIADES_RESPONSE_TO_APLIDIN_DN	Details ...	233	-0.252734	-4.42065	0	0	0	11836	tags=85%, list=60%, signal=213%
ZHANG_BREAST_CANCER_PROGENITORS_UP	ZHANG_BREAST_CANCER_PROGENITORS_UP	Details ...	386	-0.194656	-4.38893	0	0	0	14173	tags=91%, list=72%, signal=325%
DUTERTRE_ESTRADIOL_RESPONSE_24HR_UP	DUTERTRE_ESTRADIOL_RESPONSE_24HR_UP	Details ...	300	-0.217774	-4.36725	0	0	0	8857	tags=67%, list=45%, signal=120%
BILANGES_SERUM_AND_RAPAMYCIN_SENSITIVE_GENES	BILANGES_SERUM_AND_RAPAMYCIN_SENSITIVE_GENES	Details ...	62	-0.471325	-4.31419	0	0	0	6593	tags=81%, list=34%, signal=121%
MORI_IMMATURE_B_LYMPHOCYTE_DN	MORI_IMMATURE_B_LYMPHOCYTE_DN	Details ...	88	-0.384959	-4.30116	0	0	0	7406	tags=76%, list=38%, signal=122%
GRAHAM_CML_DIVIDING_VS_NORMAL_QUIESCENT_UP	GRAHAM_CML_DIVIDING_VS_NORMAL_QUIESCENT_UP	Details ...	168	-0.277616	-4.23625	0	0	0	10464	tags=81%, list=53%, signal=172%
BURTON_ADIPOGENESIS_3	BURTON_ADIPOGENESIS_3	Details ...	100	-0.361122	-4.23583	0	0	0	8240	tags=78%, list=42%, signal=134%
GARY_CD5_TARGETS_DN	GARY_CD5_TARGETS_DN	Details ...	393	-0.188217	-4.22791	0	0	0	13082	tags=85%, list=67%, signal=252%
ZHOU_CELL_CYCLE_GENES_IN_IR_RESPONSE_24HR	ZHOU_CELL_CYCLE_GENES_IN_IR_RESPONSE_24HR	Details ...	111	-0.337834	-4.20796	0	0	0	7713	tags=73%, list=39%, signal=120%
REACTOME_MRNA_PROCESSING	REACTOME_MRNA_PROCESSING	Details ...	146	-0.302286	-4.20687	0	0	0	11160	tags=87%, list=57%, signal=201%
REACTOME_CELL_CYCLE	REACTOME_CELL_CYCLE	Details ...	367	-0.18936	-4.19773	0	0	0	13384	tags=87%, list=68%, signal=269%
REACTOME_MRNA_SPLICING	REACTOME_MRNA_SPLICING	Details ...	100	-0.351274	-4.1721	0	0	0	10586	tags=89%, list=54%, signal=193%
MUELLER_PLURINET	MUELLER_PLURINET	Details ...	274	-0.221557	-4.16958	0	0	0	12733	tags=87%, list=65%, signal=245%
REACTOME_CELL_CYCLE_MITOTIC	REACTOME_CELL_CYCLE_MITOTIC	Details ...	285	-0.211195	-4.15996	0	0	0	13447	tags=89%, list=69%, signal=281%
REACTOME_PROCESSING_OF_CAPPED_INTRON_CONTAINING_PRE_MRNA	REACTOME_PROCESSING_OF_CAPPED_INTRON_CONTAINING_PRE_MRNA	Details ...	128	-0.316121	-4.15449	0	0	0	10833	tags=87%, list=55%, signal=193%
REACTOME_ACTIVATION_OF_THE_MRNA_UPON_BINDING_OF_THE_CAP_BINDING_COMPLEX_AND_EIFS_AND_SUBSEQUENT_BINDING_TO_43S	REACTOME_ACTIVATION_OF_THE_MRNA_UPON_BINDING_OF_THE_CAP_BINDING_COMPLEX_AND_EIFS_AND_SUBSEQUENT_BINDING_TO_43S	Details ...	52	-0.484738	-4.15049	0	0	0	7857	tags=88%, list=40%, signal=147%
WANG_TUMOR_INVASIVENESS_UP	WANG_TUMOR_INVASIVENESS_UP		345	-0.196982	-4.14576	0	0	0	11367	tags=77%, list=58%, signal=181%
CREIGHTON_ENDOCRINE_THERAPY_RESISTANCE_1	CREIGHTON_ENDOCRINE_THERAPY_RESISTANCE_1		468	-0.165808	-4.1326	0	0	0	12816	tags=82%, list=65%, signal=231%
BENPORATH_PROLIFERATION	BENPORATH_PROLIFERATION		129	-0.311703	-4.1253	0	0	0	10484	tags=84%, list=54%, signal=181%
WANG_RESPONSE_TO_GSK3_INHIBITOR_SB216763_DN	WANG_RESPONSE_TO_GSK3_INHIBITOR_SB216763_DN		314	-0.198306	-4.11332	0	0	0	11023	tags=76%, list=56%, signal=171%
KIM_ALL_DISORDERS_DURATION_CORR_DN	KIM_ALL_DISORDERS_DURATION_CORR_DN		138	-0.293323	-4.08161	0	0	0	8346	tags=72%, list=43%, signal=124%
SHEDDEN_LUNG_CANCER_POOR_SURVIVAL_A6	SHEDDEN_LUNG_CANCER_POOR_SURVIVAL_A6		408	-0.174357	-4.07806	0	0	0	10577	tags=71%, list=54%, signal=151%
LINDGREN_BLADDER_CANCER_CLUSTER_3_UP	LINDGREN_BLADDER_CANCER_CLUSTER_3_UP		298	-0.201228	-4.06049	0	0	0	11169	tags=77%, list=57%, signal=176%
REACTOME_FORMATION_OF_THE_TERNARY_COMPLEX_AND_SUBSEQUENTLY_THE_43S_COMPLEX	REACTOME_FORMATION_OF_THE_TERNARY_COMPLEX_AND_SUBSEQUENTLY_THE_43S_COMPLEX		46	-0.495623	-4.04412	0	0	0	6921	tags=85%, list=35%, signal=131%
CHIANG_LIVER_CANCER_SUBCLASS_UNANNOTATED_DN	CHIANG_LIVER_CANCER_SUBCLASS_UNANNOTATED_DN		175	-0.259526	-4.03456	0	0	0	10071	tags=77%, list=51%, signal=157%
CROONQUIST_IL6_DEPRIVATION_DN	CROONQUIST_IL6_DEPRIVATION_DN		94	-0.354186	-4.01616	0	0	0	8723	tags=80%, list=45%, signal=143%
WONG_MITOCHONDRIA_GENE_MODULE	WONG_MITOCHONDRIA_GENE_MODULE		201	-0.238551	-4.00796	0	0	0	10771	tags=79%, list=55%, signal=173%
PUJANA_XPRSS_INT_NETWORK	PUJANA_XPRSS_INT_NETWORK		157	-0.281098	-4.00574	0	0	0	11504	tags=87%, list=59%, signal=208%
SHEN_SMARCA2_TARGETS_UP	SHEN_SMARCA2_TARGETS_UP		398	-0.172693	-3.99105	0	0	0	15090	tags=94%, list=77%, signal=401%
SCHLOSSER_MYC_TARGETS_REPRESSED_BY_SERUM	SCHLOSSER_MYC_TARGETS_REPRESSED_BY_SERUM		145	-0.285804	-3.97321	0	0	0	10247	tags=81%, list=52%, signal=168%
DANG_MYC_TARGETS_UP	DANG_MYC_TARGETS_UP		131	-0.298568	-3.92084	0	0	0	10637	tags=84%, list=54%, signal=183%
FOURNIER_ACINAR_DEVELOPMENT_LATE_2	FOURNIER_ACINAR_DEVELOPMENT_LATE_2		256	-0.212203	-3.91688	0	0	0	10587	tags=75%, list=54%, signal=161%
BORCZUK_MALIGNANT_MESOTHELIOMA_UP	BORCZUK_MALIGNANT_MESOTHELIOMA_UP		275	-0.199488	-3.91119	0	0	0	12599	tags=84%, list=64%, signal=232%
MORI_LARGE_PRE_BII_LYMPHOCYTE_UP	MORI_LARGE_PRE_BII_LYMPHOCYTE_UP		83	-0.363105	-3.88433	0	0	0	10380	tags=89%, list=53%, signal=189%
SARRIO_EPITHELIAL_MESENCHYMAL_TRANSITION_UP	SARRIO_EPITHELIAL_MESENCHYMAL_TRANSITION_UP		165	-0.264257	-3.88177	0	0	0	7925	tags=67%, list=40%, signal=111%
SOMERVAILLE.HIGHLSC_UP	SOMERVAILLE.HIGHLSC_UP		122	-0.301095	-3.8782	0	0	0	9872	tags=80%, list=50%, signal=161%
PUJANA_BRCA_CENTERED_NETWORK	PUJANA_BRCA_CENTERED_NETWORK		111	-0.313809	-3.87595	0	0	0	11180	tags=88%, list=57%, signal=205%
CHNG_MULTIPLE_MYELOMA_HYPERPLOID_UP	CHNG_MULTIPLE_MYELOMA_HYPERPLOID_UP		48	-0.473926	-3.87079	0	0	0	7470	tags=85%, list=38%, signal=138%
YAO_TEMPORAL_RESPONSE_TO_PROGESTERONE_CLUSTER_13	YAO_TEMPORAL_RESPONSE_TO_PROGESTERONE_CLUSTER_13		153	-0.271547	-3.87073	0	0	0	11236	tags=84%, list=57%, signal=196%
ISHIDA_E2F_TARGETS	ISHIDA_E2F_TARGETS		48	-0.461487	-3.86512	0	0	0	7713	tags=85%, list=39%, signal=141%
ROME_INSULIN_TARGETS_IN_MUSCLE_UP	ROME_INSULIN_TARGETS_IN_MUSCLE_UP		392	-0.168802	-3.83123	0	0	0	13497	tags=85%, list=69%, signal=269%
KEGG_OXIDATIVE_PHOSPHORYLATION	KEGG_OXIDATIVE_PHOSPHORYLATION		103	-0.316195	-3.8219	0	0	0	11143	tags=88%, list=57%, signal=204%
MILI_PSEUDOPODIA_HAPTOTAXIS_UP	MILI_PSEUDOPODIA_HAPTOTAXIS_UP		464	-0.154131	-3.82114	0	0	0	15160	tags=92%, list=77%, signal=400%
KEGG_SPLICEOSOME	KEGG_SPLICEOSOME		116	-0.302105	-3.81839	0	0	0	10833	tags=85%, list=55%, signal=190%
ZHOU_CELL_CYCLE_GENES_IN_IR_RESPONSE_6HR	ZHOU_CELL_CYCLE_GENES_IN_IR_RESPONSE_6HR		77	-0.368676	-3.81706	0	0	0	10358	tags=90%, list=53%, signal=189%
VECCHI_GASTRIC_CANCER_EARLY_UP	VECCHI_GASTRIC_CANCER_EARLY_UP		372	-0.170087	-3.79796	0	0	0	10052	tags=68%, list=51%, signal=137%
REACTOME_MITOTIC_M_M_G1_PHASES	REACTOME_MITOTIC_M_M_G1_PHASES		150	-0.265536	-3.7898	0	0	0	11160	tags=83%, list=57%, signal=192%
REACTOME_DNA_REPLICATION	REACTOME_DNA_REPLICATION		169	-0.253978	-3.78674	0	0	0	11177	tags=82%, list=57%, signal=190%
IVANOVA_HEMATOPOIESIS_EARLY_PROGENITOR	IVANOVA_HEMATOPOIESIS_EARLY_PROGENITOR		467	-0.150996	-3.78553	0	0	0	13888	tags=86%, list=71%, signal=288%
MSI2_BINDING_MS20	MSI2_BINDING_MS20		117	-0.305814	-3.78084	0	0	0	9614	tags=79%, list=49%, signal=155%
PENG_LEUCINE_DEPRIVATION_DN	PENG_LEUCINE_DEPRIVATION_DN		171	-0.243725	-3.77252	0	0	0	10272	tags=77%, list=52%, signal=160%
DAIRKEE_TERT_TARGETS_UP	DAIRKEE_TERT_TARGETS_UP		318	-0.182654	-3.76774	0	0	0	9907	tags=69%, list=51%, signal=136%
YAO_TEMPORAL_RESPONSE_TO_PROGESTERONE_CLUSTER_17	YAO_TEMPORAL_RESPONSE_TO_PROGESTERONE_CLUSTER_17		157	-0.252848	-3.74611	0	0	0	10556	tags=79%, list=54%, signal=170%
CHANG_CYCLING_GENES	CHANG_CYCLING_GENES		134	-0.274045	-3.73792	0	0	0	7970	tags=68%, list=41%, signal=114%
CHAUHAN_RESPONSE_TO_METHOXYESTRADIOL_DN	CHAUHAN_RESPONSE_TO_METHOXYESTRADIOL_DN		95	-0.336624	-3.72846	0	0	0	8695	tags=78%, list=44%, signal=139%
GRAHAM_NORMAL_QUIESCENT_VS_NORMAL_DIVIDING_DN	GRAHAM_NORMAL_QUIESCENT_VS_NORMAL_DIVIDING_DN		81	-0.341937	-3.64534	0	0	0	8322	tags=77%, list=42%, signal=133%
KRIVTSOV_SELF-RENEWAL_DOWN	KRIVTSOV_SELF-RENEWAL_DOWN		134	-0.272553	-3.63897	0	0	0	11068	tags=84%, list=57%, signal=191%
PENG_RAPAMYCIN_RESPONSE_DN	PENG_RAPAMYCIN_RESPONSE_DN		212	-0.216435	-3.63588	0	0	0	12805	tags=87%, list=65%, signal=248%
LI_AMPLIFIED_IN_LUNG_CANCER	LI_AMPLIFIED_IN_LUNG_CANCER		162	-0.245727	-3.61489	0	0	0	7317	tags=62%, list=37%, signal=98%
SCHAEFFER_PROSTATE_DEVELOPMENT_6HR_DN	SCHAEFFER_PROSTATE_DEVELOPMENT_6HR_DN		460	-0.148086	-3.60212	0	0	0	14283	tags=87%, list=73%, signal=315%
MOOTHA_PGC	MOOTHA_PGC		383	-0.156972	-3.59111	0	0	0	10639	tags=70%, list=54%, signal=150%
YAO_TEMPORAL_RESPONSE_TO_PROGESTERONE_CLUSTER_14	YAO_TEMPORAL_RESPONSE_TO_PROGESTERONE_CLUSTER_14		128	-0.279528	-3.59066	0	0	0	9862	tags=78%, list=50%, signal=156%
HOFFMANN_LARGE_TO_SMALL_PRE_BII_LYMPHOCYTE_UP	HOFFMANN_LARGE_TO_SMALL_PRE_BII_LYMPHOCYTE_UP		151	-0.253101	-3.56111	0	0	0	8311	tags=68%, list=42%, signal=116%
LE_EGR2_TARGETS_UP	LE_EGR2_TARGETS_UP		102	-0.300252	-3.55769	0	0	0	9703	tags=79%, list=50%, signal=157%
TOYOTA_TARGETS_OF_MIR34B_AND_MIR34C	TOYOTA_TARGETS_OF_MIR34B_AND_MIR34C		394	-0.152902	-3.54295	0	0	0	13966	tags=86%, list=71%, signal=295%
FUJII_YBX1_TARGETS_DN	FUJII_YBX1_TARGETS_DN		190	-0.225335	-3.53981	0	0	0	10576	tags=76%, list=54%, signal=164%
REACTOME_HIV_INFECTION	REACTOME_HIV_INFECTION		174	-0.228844	-3.52316	0	0	0	13004	tags=89%, list=66%, signal=263%
MATTIOLI_MGUS_VS_PCL	MATTIOLI_MGUS_VS_PCL		90	-0.311408	-3.49229	0	0	0	8074	tags=72%, list=41%, signal=122%
MARTINEZ_RESPONSE_TO_TRABECTEDIN_DN	MARTINEZ_RESPONSE_TO_TRABECTEDIN_DN		260	-0.187317	-3.48772	0	0	0	14910	tags=95%, list=76%, signal=391%
PAL_PRMT5_TARGETS_UP	PAL_PRMT5_TARGETS_UP		187	-0.21493	-3.44203	0	0	0	10598	tags=75%, list=54%, signal=163%
IRITANI_MAD1_TARGETS_DN	IRITANI_MAD1_TARGETS_DN		43	-0.437662	-3.439	0	0	0	8755	tags=88%, list=45%, signal=159%
BENPORATH_ES_1	BENPORATH_ES_1		344	-0.163007	-3.43795	0	0	0	12463	tags=80%, list=64%, signal=215%
COLINA_TARGETS_OF_4EBP1_AND_4EBP2	COLINA_TARGETS_OF_4EBP1_AND_4EBP2		325	-0.164113	-3.42723	0	1.09e-05	0.001	10639	tags=70%, list=54%, signal=152%
KEGG_PARKINSONS_DISEASE	KEGG_PARKINSONS_DISEASE		104	-0.288338	-3.41323	0	1.08e-05	0.001	11143	tags=86%, list=57%, signal=198%
BILANGES_RAPAMYCIN_SENSITIVE_VIA_TSC1_AND_TSC2	BILANGES_RAPAMYCIN_SENSITIVE_VIA_TSC1_AND_TSC2		65	-0.358581	-3.39484	0	1.07e-05	0.001	10175	tags=88%, list=52%, signal=182%
BOYAULT_LIVER_CANCER_SUBCLASS_G3_UP	BOYAULT_LIVER_CANCER_SUBCLASS_G3_UP		176	-0.219827	-3.39012	0	1.06e-05	0.001	11646	tags=81%, list=59%, signal=199%
MARKEY_RB1_ACUTE_LOF_UP	MARKEY_RB1_ACUTE_LOF_UP		214	-0.201951	-3.38881	0	1.05e-05	0.001	11646	tags=79%, list=59%, signal=194%
MALONEY_RESPONSE_TO_17AAG_DN	MALONEY_RESPONSE_TO_17AAG_DN		71	-0.35184	-3.37735	0	1.04e-05	0.001	11064	tags=92%, list=56%, signal=210%
IVANOVA_HEMATOPOIESIS_INTERMEDIATE_PROGENITOR	IVANOVA_HEMATOPOIESIS_INTERMEDIATE_PROGENITOR		135	-0.250511	-3.37559	0	1.03e-05	0.001	12101	tags=87%, list=62%, signal=225%
WINNEPENNINCKX_MELANOMA_METASTASIS_UP	WINNEPENNINCKX_MELANOMA_METASTASIS_UP		144	-0.244314	-3.369	0	1.02e-05	0.001	10619	tags=78%, list=54%, signal=170%
MULLIGHAN_MLL_SIGNATURE_2_UP	MULLIGHAN_MLL_SIGNATURE_2_UP		366	-0.153177	-3.36262	0	1.01e-05	0.001	12681	tags=80%, list=65%, signal=222%
ACEVEDO_NORMAL_TISSUE_ADJACENT_TO_LIVER_TUMOR_DN	ACEVEDO_NORMAL_TISSUE_ADJACENT_TO_LIVER_TUMOR_DN		310	-0.164074	-3.36144	0	1e-05	0.001	12063	tags=78%, list=62%, signal=199%
REACTOME_TCA_CYCLE_AND_RESPIRATORY_ELECTRON_TRANSPORT	REACTOME_TCA_CYCLE_AND_RESPIRATORY_ELECTRON_TRANSPORT		110	-0.26973	-3.36053	0	9.96e-06	0.001	10771	tags=82%, list=55%, signal=181%
FRASOR_RESPONSE_TO_SERM_OR_FULVESTRANT_DN	FRASOR_RESPONSE_TO_SERM_OR_FULVESTRANT_DN		50	-0.403456	-3.3524	0	9.88e-06	0.001	9745	tags=90%, list=50%, signal=179%
AMUNDSON_GAMMA_RADIATION_RESPONSE	AMUNDSON_GAMMA_RADIATION_RESPONSE		40	-0.45191	-3.34998	0	9.8e-06	0.001	5367	tags=73%, list=27%, signal=100%
FARMER_BREAST_CANCER_CLUSTER_2	FARMER_BREAST_CANCER_CLUSTER_2		32	-0.490162	-3.32999	0	9.71e-06	0.001	6941	tags=84%, list=35%, signal=130%
BASAKI_YBX1_TARGETS_UP	BASAKI_YBX1_TARGETS_UP		259	-0.176085	-3.31552	0	9.63e-06	0.001	7713	tags=57%, list=39%, signal=92%
WELCSH_BRCA1_TARGETS_DN	WELCSH_BRCA1_TARGETS_DN		135	-0.24424	-3.30518	0	9.55e-06	0.001	9902	tags=75%, list=51%, signal=150%
CROONQUIST_NRAS_SIGNALING_DN	CROONQUIST_NRAS_SIGNALING_DN		69	-0.341211	-3.30308	0	9.48e-06	0.001	7817	tags=74%, list=40%, signal=123%
BURTON_ADIPOGENESIS_5	BURTON_ADIPOGENESIS_5		108	-0.273557	-3.3027	0	9.4e-06	0.001	10630	tags=81%, list=54%, signal=177%
MYC_UP_COLLER	MYC_UP_COLLER		188	-0.212052	-3.30217	0	9.32e-06	0.001	10888	tags=77%, list=56%, signal=171%
STEIN_ESRRA_TARGETS_UP	STEIN_ESRRA_TARGETS_UP		337	-0.152954	-3.28752	0	9.25e-06	0.001	12805	tags=80%, list=65%, signal=228%
SCHLOSSER_MYC_TARGETS_AND_SERUM_RESPONSE_DN	SCHLOSSER_MYC_TARGETS_AND_SERUM_RESPONSE_DN		44	-0.430349	-3.28484	0	9.18e-06	0.001	8505	tags=86%, list=43%, signal=152%
ZHAN_MULTIPLE_MYELOMA_PR_UP	ZHAN_MULTIPLE_MYELOMA_PR_UP		41	-0.428379	-3.27141	0	9.11e-06	0.001	5481	tags=71%, list=28%, signal=98%
KONG_E2F3_TARGETS	KONG_E2F3_TARGETS		90	-0.303517	-3.26096	0	9.04e-06	0.001	8663	tags=74%, list=44%, signal=133%
BIDUS_METASTASIS_UP	BIDUS_METASTASIS_UP		198	-0.201682	-3.25125	0	8.97e-06	0.001	10927	tags=76%, list=56%, signal=170%
LEE_EARLY_T_LYMPHOCYTE_UP	LEE_EARLY_T_LYMPHOCYTE_UP		96	-0.285234	-3.24698	0	8.9e-06	0.001	6886	tags=64%, list=35%, signal=98%
REACTOME_TRANSCRIPTION	REACTOME_TRANSCRIPTION		175	-0.207827	-3.22286	0	8.83e-06	0.001	11522	tags=79%, list=59%, signal=191%
CONCANNON_APOPTOSIS_BY_EPOXOMICIN_DN	CONCANNON_APOPTOSIS_BY_EPOXOMICIN_DN		144	-0.233874	-3.22152	0	8.76e-06	0.001	9598	tags=72%, list=49%, signal=141%
LI_DCP2_BOUND_MRNA	LI_DCP2_BOUND_MRNA		80	-0.312837	-3.21581	0	8.7e-06	0.001	8587	tags=75%, list=44%, signal=133%
CHIANG_LIVER_CANCER_SUBCLASS_PROLIFERATION_UP	CHIANG_LIVER_CANCER_SUBCLASS_PROLIFERATION_UP		162	-0.22315	-3.21397	0	8.63e-06	0.001	8239	tags=64%, list=42%, signal=110%
RHODES_UNDIFFERENTIATED_CANCER	RHODES_UNDIFFERENTIATED_CANCER		60	-0.353186	-3.19219	0	8.57e-06	0.001	7793	tags=75%, list=40%, signal=124%
WEST_ADRENOCORTICAL_TUMOR_UP	WEST_ADRENOCORTICAL_TUMOR_UP		272	-0.166138	-3.18456	0	2.58e-05	0.003	10688	tags=71%, list=55%, signal=154%
LI_WILMS_TUMOR_VS_FETAL_KIDNEY_1_DN	LI_WILMS_TUMOR_VS_FETAL_KIDNEY_1_DN		151	-0.215027	-3.17256	0	2.57e-05	0.003	11904	tags=82%, list=61%, signal=208%
SONG_TARGETS_OF_IE86_CMV_PROTEIN	SONG_TARGETS_OF_IE86_CMV_PROTEIN		58	-0.349002	-3.15264	0	2.55e-05	0.003	9731	tags=84%, list=50%, signal=167%
HSCVSGMP_DN	HSCVSGMP_DN		174	-0.207873	-3.14616	0	2.53e-05	0.003	8459	tags=64%, list=43%, signal=111%
REACTOME_RESPIRATORY_ELECTRON_TRANSPORT_ATP_SYNTHESIS_BY_CHEMIOSMOTIC_COUPLING_AND_HEAT_PRODUCTION_BY_UNCOUPLING_PROTEINS_	REACTOME_RESPIRATORY_ELECTRON_TRANSPORT_ATP_SYNTHESIS_BY_CHEMIOSMOTIC_COUPLING_AND_HEAT_PRODUCTION_BY_UNCOUPLING_PROTEINS_		74	-0.310589	-3.14148	0	2.51e-05	0.003	11143	tags=88%, list=57%, signal=203%
MISSIAGLIA_REGULATED_BY_METHYLATION_DN	MISSIAGLIA_REGULATED_BY_METHYLATION_DN		112	-0.252603	-3.13759	0	2.49e-05	0.003	11868	tags=86%, list=61%, signal=216%
MORI_PRE_BI_LYMPHOCYTE_UP	MORI_PRE_BI_LYMPHOCYTE_UP		76	-0.308876	-3.12421	0	2.48e-05	0.003	8663	tags=75%, list=44%, signal=134%
HSCVSCMP_DN	HSCVSCMP_DN		119	-0.243308	-3.10513	0	2.46e-05	0.003	11557	tags=83%, list=59%, signal=202%
MODY_HIPPOCAMPUS_PRENATAL	MODY_HIPPOCAMPUS_PRENATAL		41	-0.410599	-3.08256	0	3.24e-05	0.004	7739	tags=80%, list=40%, signal=133%
ENK_UV_RESPONSE_KERATINOCYTE_DN	ENK_UV_RESPONSE_KERATINOCYTE_DN		452	-0.126506	-3.0809	0	3.22e-05	0.004	14391	tags=86%, list=73%, signal=316%
CHICAS_RB1_TARGETS_GROWING	CHICAS_RB1_TARGETS_GROWING		211	-0.185292	-3.08081	0	3.2e-05	0.004	11354	tags=76%, list=58%, signal=180%
ENK_UV_RESPONSE_KERATINOCYTE_UP	ENK_UV_RESPONSE_KERATINOCYTE_UP		490	-0.122897	-3.07221	0	3.18e-05	0.004	7486	tags=50%, list=38%, signal=79%
RICKMAN_TUMOR_DIFFERENTIATED_WELL_VS_POORLY_UP	RICKMAN_TUMOR_DIFFERENTIATED_WELL_VS_POORLY_UP		208	-0.181506	-3.06813	0	3.16e-05	0.004	13337	tags=86%, list=68%, signal=267%
REN_BOUND_BY_E2F	REN_BOUND_BY_E2F		56	-0.351188	-3.06646	0	3.13e-05	0.004	8530	tags=79%, list=44%, signal=139%
GARCIA_TARGETS_OF_FLI1_AND_DAX1_DN	GARCIA_TARGETS_OF_FLI1_AND_DAX1_DN		152	-0.212611	-3.05775	0	3.11e-05	0.004	9784	tags=71%, list=50%, signal=141%
MOREAUX_MULTIPLE_MYELOMA_BY_TACI_DN	MOREAUX_MULTIPLE_MYELOMA_BY_TACI_DN		147	-0.209597	-3.05274	0	3.09e-05	0.004	13512	tags=90%, list=69%, signal=287%
ONKEN_UVEAL_MELANOMA_DN	ONKEN_UVEAL_MELANOMA_DN		473	-0.122184	-3.0509	0	3.07e-05	0.004	10749	tags=67%, list=55%, signal=145%
REACTOME_G1_S_TRANSITION	REACTOME_G1_S_TRANSITION		100	-0.257837	-3.0449	0	3.05e-05	0.004	8294	tags=68%, list=42%, signal=117%
WHITFIELD_CELL_CYCLE_LITERATURE	WHITFIELD_CELL_CYCLE_LITERATURE		44	-0.385666	-3.04462	0	3.03e-05	0.004	8933	tags=84%, list=46%, signal=154%
MOOTHA_VOXPHOS	MOOTHA_VOXPHOS		76	-0.300625	-3.03476	0	3.01e-05	0.004	11143	tags=87%, list=57%, signal=201%
JOHNSTONE_PARVB_TARGETS_2_DN	JOHNSTONE_PARVB_TARGETS_2_DN		308	-0.14718	-3.03344	0	3.74e-05	0.005	15094	tags=92%, list=77%, signal=393%
ZHANG_TLX_TARGETS_36HR_DN	ZHANG_TLX_TARGETS_36HR_DN		175	-0.194679	-3.03338	0	3.71e-05	0.005	13120	tags=86%, list=67%, signal=259%
STEIN_ESRRA_TARGETS	STEIN_ESRRA_TARGETS		469	-0.123103	-3.03134	0	3.69e-05	0.005	12805	tags=77%, list=65%, signal=218%
MULLIGHAN_MLL_SIGNATURE_1_UP	MULLIGHAN_MLL_SIGNATURE_1_UP		326	-0.145965	-3.02395	0	3.67e-05	0.005	7282	tags=52%, list=37%, signal=81%
TANG_SENESCENCE_TP53_TARGETS_DN	TANG_SENESCENCE_TP53_TARGETS_DN		52	-0.358478	-3.01438	0	4.39e-05	0.006	8440	tags=79%, list=43%, signal=138%
REACTOME_HIV_LIFE_CYCLE	REACTOME_HIV_LIFE_CYCLE		100	-0.25732	-3.00524	0	4.36e-05	0.006	13004	tags=92%, list=66%, signal=272%
BURTON_ADIPOGENESIS_PEAK_AT_24HR	BURTON_ADIPOGENESIS_PEAK_AT_24HR		39	-0.400589	-2.99221	0	4.34e-05	0.006	8240	tags=82%, list=42%, signal=141%
KIM_MYC_AMPLIFICATION_TARGETS_UP	KIM_MYC_AMPLIFICATION_TARGETS_UP		179	-0.192387	-2.98037	0	5.06e-05	0.007	10162	tags=71%, list=52%, signal=146%
CHANG_CORE_SERUM_RESPONSE_UP	CHANG_CORE_SERUM_RESPONSE_UP		187	-0.186852	-2.97428	0	5.76e-05	0.008	12504	tags=82%, list=64%, signal=226%
KIM_ALL_DISORDERS_CALB1_CORR_UP	KIM_ALL_DISORDERS_CALB1_CORR_UP		495	-0.110916	-2.96337	0	5.72e-05	0.008	15647	tags=91%, list=80%, signal=440%
REACTOME_HOST_INTERACTIONS_OF_HIV_FACTORS	REACTOME_HOST_INTERACTIONS_OF_HIV_FACTORS		112	-0.235493	-2.96271	0	5.69e-05	0.008	12376	tags=87%, list=63%, signal=234%
KANG_DOXORUBICIN_RESISTANCE_UP	KANG_DOXORUBICIN_RESISTANCE_UP		49	-0.355678	-2.9572	0	5.65e-05	0.008	8240	tags=78%, list=42%, signal=134%
HAHTOLA_MYCOSIS_FUNGOIDES_CD4_DN	HAHTOLA_MYCOSIS_FUNGOIDES_CD4_DN		109	-0.2381	-2.94704	0	5.62e-05	0.008	12432	tags=87%, list=63%, signal=237%
DACOSTA_UV_RESPONSE_VIA_ERCC3_UP	DACOSTA_UV_RESPONSE_VIA_ERCC3_UP		274	-0.15147	-2.94439	0	5.59e-05	0.008	7511	tags=53%, list=38%, signal=85%
ALONSO_METASTASIS_UP	ALONSO_METASTASIS_UP		174	-0.186768	-2.94113	0	5.55e-05	0.008	12245	tags=81%, list=63%, signal=214%
IVANOVA_HEMATOPOIESIS_LATE_PROGENITOR	IVANOVA_HEMATOPOIESIS_LATE_PROGENITOR		467	-0.116379	-2.93136	0	5.52e-05	0.008	13753	tags=82%, list=70%, signal=268%
HEDENFALK_BREAST_CANCER_BRCA1_VS_BRCA2	HEDENFALK_BREAST_CANCER_BRCA1_VS_BRCA2		155	-0.201531	-2.93098	0	5.49e-05	0.008	10994	tags=76%, list=56%, signal=172%
REACTOME_CELL_CYCLE_CHECKPOINTS	REACTOME_CELL_CYCLE_CHECKPOINTS		106	-0.243417	-2.93082	0	5.46e-05	0.008	13365	tags=92%, list=68%, signal=290%
BRACHAT_RESPONSE_TO_CAMPTOTHECIN_DN	BRACHAT_RESPONSE_TO_CAMPTOTHECIN_DN		41	-0.386953	-2.91747	0	8.13e-05	0.012	9634	tags=88%, list=49%, signal=172%
MIKKELSEN_MEF_HCP_WITH_H3K27ME3	MIKKELSEN_MEF_HCP_WITH_H3K27ME3		497	-0.111312	-2.916	0	8.09e-05	0.012	2920	tags=26%, list=15%, signal=29%
LIU_SOX4_TARGETS_DN	LIU_SOX4_TARGETS_DN		276	-0.155231	-2.91367	0	8.04e-05	0.012	15026	tags=92%, list=77%, signal=390%
KEGG_PYRIMIDINE_METABOLISM	KEGG_PYRIMIDINE_METABOLISM		88	-0.267257	-2.91199	0	8e-05	0.012	9033	tags=73%, list=46%, signal=134%
REACTOME_OLFACTORY_SIGNALING_PATHWAY	REACTOME_OLFACTORY_SIGNALING_PATHWAY		46	-0.365669	-2.90533	0	7.95e-05	0.012	1797	tags=46%, list=9%, signal=50%
OSMAN_BLADDER_CANCER_DN	OSMAN_BLADDER_CANCER_DN		338	-0.137379	-2.90467	0	7.91e-05	0.012	15202	tags=91%, list=78%, signal=400%
ALCALAY_AML_BY_NPM1_LOCALIZATION_DN	ALCALAY_AML_BY_NPM1_LOCALIZATION_DN		179	-0.186767	-2.90315	0	7.87e-05	0.012	7536	tags=57%, list=38%, signal=92%
OSMAN_BLADDER_CANCER_UP	OSMAN_BLADDER_CANCER_UP		370	-0.130832	-2.90258	0	7.82e-05	0.012	15853	tags=94%, list=81%, signal=483%
PARK_APL_PATHOGENESIS_DN	PARK_APL_PATHOGENESIS_DN		46	-0.366862	-2.88833	0	9.08e-05	0.014	7308	tags=74%, list=37%, signal=118%
SCIAN_CELL_CYCLE_TARGETS_OF_TP53_AND_TP73_DN	SCIAN_CELL_CYCLE_TARGETS_OF_TP53_AND_TP73_DN		20	-0.538997	-2.88434	0	9.68e-05	0.015	5123	tags=80%, list=26%, signal=108%
WANG_LMO4_TARGETS_UP	WANG_LMO4_TARGETS_UP		323	-0.137364	-2.8751	0	9.63e-05	0.015	12755	tags=79%, list=65%, signal=222%
REACTOME_LATE_PHASE_OF_HIV_LIFE_CYCLE	REACTOME_LATE_PHASE_OF_HIV_LIFE_CYCLE		88	-0.257618	-2.87457	0	9.58e-05	0.015	13004	tags=92%, list=66%, signal=273%
REACTOME_REGULATION_OF_MITOTIC_CELL_CYCLE	REACTOME_REGULATION_OF_MITOTIC_CELL_CYCLE		72	-0.285905	-2.86773	0	0.000102	0.016	8294	tags=71%, list=42%, signal=122%
REACTOME_MITOTIC_G1_G1_S_PHASES	REACTOME_MITOTIC_G1_G1_S_PHASES		122	-0.224619	-2.85882	0	0.00012	0.019	13447	tags=91%, list=69%, signal=289%
REACTOME_RESPIRATORY_ELECTRON_TRANSPORT	REACTOME_RESPIRATORY_ELECTRON_TRANSPORT		59	-0.313337	-2.85736	0	0.000126	0.02	11143	tags=88%, list=57%, signal=204%
DANG_REGULATED_BY_MYC_UP	DANG_REGULATED_BY_MYC_UP		68	-0.293736	-2.8472	0	0.000138	0.022	8956	tags=75%, list=46%, signal=138%
YU_MYC_TARGETS_UP	YU_MYC_TARGETS_UP		38	-0.384034	-2.84347	0	0.000137	0.022	8986	tags=84%, list=46%, signal=155%
FERREIRA_EWINGS_SARCOMA_UNSTABLE_VS_STABLE_UP	FERREIRA_EWINGS_SARCOMA_UNSTABLE_VS_STABLE_UP		141	-0.208028	-2.83701	0	0.000155	0.025	13734	tags=91%, list=70%, signal=302%
PUJANA_BREAST_CANCER_LIT_INT_NETWORK	PUJANA_BREAST_CANCER_LIT_INT_NETWORK		96	-0.245399	-2.8331	0	0.00016	0.026	12966	tags=91%, list=66%, signal=267%
POMEROY_MEDULLOBLASTOMA_PROGNOSIS_DN	POMEROY_MEDULLOBLASTOMA_PROGNOSIS_DN		42	-0.376879	-2.82651	0	0.000166	0.027	6158	tags=69%, list=31%, signal=101%
REACTOME_MRNA_SPLICING_MINOR_PATHWAY	REACTOME_MRNA_SPLICING_MINOR_PATHWAY		37	-0.393557	-2.82009	0	0.000171	0.028	10833	tags=95%, list=55%, signal=211%
HOLLMANN_APOPTOSIS_VIA_CD40_DN	HOLLMANN_APOPTOSIS_VIA_CD40_DN		231	-0.163531	-2.81837	0	0.00017	0.028	13537	tags=85%, list=69%, signal=273%
SCHLOSSER_MYC_AND_SERUM_RESPONSE_SYNERGY	SCHLOSSER_MYC_AND_SERUM_RESPONSE_SYNERGY		27	-0.444094	-2.81393	0	0.000175	0.029	10174	tags=96%, list=52%, signal=200%
PUJANA_BREAST_CANCER_WITH_BRCA1_MUTATED_UP	PUJANA_BREAST_CANCER_WITH_BRCA1_MUTATED_UP		51	-0.336128	-2.81021	0	0.00018	0.03	8027	tags=75%, list=41%, signal=126%
GAVIN_FOXP3_TARGETS_CLUSTER_P6	GAVIN_FOXP3_TARGETS_CLUSTER_P6		85	-0.258549	-2.80863	0	0.000185	0.031	6940	tags=61%, list=35%, signal=94%
SWEET_LUNG_CANCER_KRAS_UP	SWEET_LUNG_CANCER_KRAS_UP		438	-0.114983	-2.8086	0	0.000185	0.031	9156	tags=58%, list=47%, signal=106%
ZHONG_SECRETOME_OF_LUNG_CANCER_AND_FIBROBLAST	ZHONG_SECRETOME_OF_LUNG_CANCER_AND_FIBROBLAST		120	-0.227235	-2.80671	0	0.000184	0.031	9776	tags=73%, list=50%, signal=144%
DAZARD_RESPONSE_TO_UV_NHEK_DN	DAZARD_RESPONSE_TO_UV_NHEK_DN		285	-0.142659	-2.80095	0	0.000189	0.032	15869	tags=95%, list=81%, signal=494%
AGUIRRE_PANCREATIC_CANCER_COPY_NUMBER_DN	AGUIRRE_PANCREATIC_CANCER_COPY_NUMBER_DN		214	-0.16455	-2.79798	0	0.000194	0.033	13194	tags=84%, list=67%, signal=254%
RHODES_CANCER_META_SIGNATURE	RHODES_CANCER_META_SIGNATURE		58	-0.310272	-2.79165	0	0.000193	0.033	8799	tags=76%, list=45%, signal=137%
REACTOME_AMYLOIDS	REACTOME_AMYLOIDS		63	-0.289704	-2.79163	0	0.000192	0.033	8023	tags=70%, list=41%, signal=118%
ZHANG_RESPONSE_TO_CANTHARIDIN_DN	ZHANG_RESPONSE_TO_CANTHARIDIN_DN		63	-0.291631	-2.78673	0	0.000191	0.033	12648	tags=94%, list=65%, signal=264%
LU_EZH2_TARGETS_UP	LU_EZH2_TARGETS_UP		238	-0.156372	-2.77637	0	0.00019	0.033	10717	tags=70%, list=55%, signal=153%
REACTOME_M_G1_TRANSITION	REACTOME_M_G1_TRANSITION		72	-0.281593	-2.77635	0	0.000189	0.033	10826	tags=83%, list=55%, signal=186%
OUELLET_OVARIAN_CANCER_INVASIVE_VS_LMP_UP	OUELLET_OVARIAN_CANCER_INVASIVE_VS_LMP_UP		109	-0.226276	-2.77177	0	0.000188	0.033	10147	tags=74%, list=52%, signal=153%
HUANG_GATA2_TARGETS_UP	HUANG_GATA2_TARGETS_UP		133	-0.203888	-2.77129	0	0.000187	0.033	9876	tags=71%, list=50%, signal=142%
MARTINEZ_RB1_TARGETS_DN	MARTINEZ_RB1_TARGETS_DN		469	-0.110521	-2.76804	0	0.000192	0.034	13129	tags=78%, list=67%, signal=230%
ZHANG_TLX_TARGETS_DN	ZHANG_TLX_TARGETS_DN		82	-0.256034	-2.76406	0	0.000191	0.034	10770	tags=80%, list=55%, signal=178%
DMAP_MONO.VS.HSC_DN	DMAP_MONO.VS.HSC_DN		319	-0.133551	-2.76397	0	0.00019	0.034	14126	tags=85%, list=72%, signal=301%
TIEN_INTESTINE_PROBIOTICS_6HR_UP	TIEN_INTESTINE_PROBIOTICS_6HR_UP		54	-0.319695	-2.76321	0	0.000189	0.034	6813	tags=67%, list=35%, signal=102%
KAMMINGA_EZH2_TARGETS	KAMMINGA_EZH2_TARGETS		39	-0.369428	-2.74858	0	0.000227	0.041	8849	tags=82%, list=45%, signal=149%
REACTOME_S_PHASE	REACTOME_S_PHASE		100	-0.234582	-2.74799	0	0.000226	0.041	13447	tags=92%, list=69%, signal=292%
GAVIN_FOXP3_TARGETS_CLUSTER_T7	GAVIN_FOXP3_TARGETS_CLUSTER_T7		91	-0.24593	-2.73929	0	0.000247	0.045	7904	tags=65%, list=40%, signal=108%
SOMERVAILLE.HIGHLSCVSHSC_UP	SOMERVAILLE.HIGHLSCVSHSC_UP		67	-0.278658	-2.73802	0	0.000251	0.046	12392	tags=91%, list=63%, signal=247%
SOMERVAILLE.LOWLSCVSHSC_UP	SOMERVAILLE.LOWLSCVSHSC_UP		70	-0.278671	-2.72725	0	0.000277	0.051	12188	tags=90%, list=62%, signal=237%
SCHUHMACHER_MYC_TARGETS_UP	SCHUHMACHER_MYC_TARGETS_UP		72	-0.277699	-2.71909	0	0.000298	0.055	10358	tags=81%, list=53%, signal=170%
YAGI_AML_WITH_11Q23_REARRANGED	YAGI_AML_WITH_11Q23_REARRANGED		321	-0.12807	-2.7129	0	0.000313	0.057	15897	tags=94%, list=81%, signal=490%
CHEMNITZ_RESPONSE_TO_PROSTAGLANDIN_E2_UP	CHEMNITZ_RESPONSE_TO_PROSTAGLANDIN_E2_UP		125	-0.210029	-2.71254	0	0.000322	0.058	10484	tags=74%, list=54%, signal=159%
GARY_CD5_TARGETS_UP	GARY_CD5_TARGETS_UP		432	-0.113404	-2.71162	0	0.00032	0.058	14919	tags=87%, list=76%, signal=358%
VERNELL_RETINOBLASTOMA_PATHWAY_UP	VERNELL_RETINOBLASTOMA_PATHWAY_UP		66	-0.280159	-2.70963	0	0.000324	0.059	13226	tags=95%, list=68%, signal=293%
KEGG_DNA_REPLICATION	KEGG_DNA_REPLICATION		34	-0.387396	-2.7042	0	0.000328	0.06	7979	tags=79%, list=41%, signal=134%
ODONNELL_TFRC_TARGETS_DN	ODONNELL_TFRC_TARGETS_DN		122	-0.216908	-2.70286	0	0.000337	0.062	7979	tags=62%, list=41%, signal=104%
FLECHNER_PBL_KIDNEY_TRANSPLANT_OK_VS_DONOR_UP	FLECHNER_PBL_KIDNEY_TRANSPLANT_OK_VS_DONOR_UP		142	-0.198668	-2.69833	0	0.000346	0.063	10757	tags=75%, list=55%, signal=164%
BYSTRYKH_HEMATOPOIESIS_STEM_CELL_AND_BRAIN_QTL_CIS	BYSTRYKH_HEMATOPOIESIS_STEM_CELL_AND_BRAIN_QTL_CIS		55	-0.315007	-2.69812	0	0.000345	0.063	9872	tags=82%, list=50%, signal=165%
REACTOME_REGULATION_OF_MRNA_STABILITY_BY_PROTEINS_THAT_BIND_AU_RICH_ELEMENTS	REACTOME_REGULATION_OF_MRNA_STABILITY_BY_PROTEINS_THAT_BIND_AU_RICH_ELEMENTS		72	-0.27119	-2.68049	0	0.000405	0.074	10757	tags=82%, list=55%, signal=181%
JOHANSSON_GLIOMAGENESIS_BY_PDGFB_UP	JOHANSSON_GLIOMAGENESIS_BY_PDGFB_UP		57	-0.303158	-2.67029	0	0.000435	0.08	7824	tags=70%, list=40%, signal=117%
PID_AURORA_B_PATHWAY	PID_AURORA_B_PATHWAY		35	-0.377605	-2.66817	0	0.000448	0.083	9405	tags=86%, list=48%, signal=165%
PYEON_CANCER_HEAD_AND_NECK_VS_CERVICAL_UP	PYEON_CANCER_HEAD_AND_NECK_VS_CERVICAL_UP		163	-0.179228	-2.66374	0	0.000457	0.085	14061	tags=90%, list=72%, signal=315%
GOLDRATH_HOMEOSTATIC_PROLIFERATION	GOLDRATH_HOMEOSTATIC_PROLIFERATION		154	-0.185287	-2.66309	0	0.00046	0.086	12805	tags=84%, list=65%, signal=240%
REACTOME_MITOTIC_PROMETAPHASE	REACTOME_MITOTIC_PROMETAPHASE		74	-0.260422	-2.65023	0	0.000483	0.091	9740	tags=76%, list=50%, signal=150%
NIKOLSKY_BREAST_CANCER_1Q21_AMPLICON	NIKOLSKY_BREAST_CANCER_1Q21_AMPLICON		33	-0.3796	-2.64896	0	0.000481	0.091	6822	tags=73%, list=35%, signal=111%
YAMASHITA_LIVER_CANCER_WITH_EPCAM_UP	YAMASHITA_LIVER_CANCER_WITH_EPCAM_UP		48	-0.329778	-2.64367	0	0.000504	0.096	9062	tags=79%, list=46%, signal=147%
ALCALA_APOPTOSIS	ALCALA_APOPTOSIS		83	-0.243516	-2.63245	0	0.000562	0.106	8701	tags=69%, list=44%, signal=123%
MARTENS_BOUND_BY_PML_RARA_FUSION	MARTENS_BOUND_BY_PML_RARA_FUSION		409	-0.114404	-2.62251	0	0.000619	0.117	12363	tags=74%, list=63%, signal=197%
THEILGAARD_NEUTROPHIL_AT_SKIN_WOUND_DN	THEILGAARD_NEUTROPHIL_AT_SKIN_WOUND_DN		215	-0.154589	-2.62199	0	0.000632	0.12	14495	tags=89%, list=74%, signal=340%
IIZUKA_LIVER_CANCER_PROGRESSION_L0_L1_DN	IIZUKA_LIVER_CANCER_PROGRESSION_L0_L1_DN		20	-0.490349	-2.61963	0	0.000649	0.123	8033	tags=90%, list=41%, signal=152%
OXFORD_RALA_OR_RALB_TARGETS_UP	OXFORD_RALA_OR_RALB_TARGETS_UP		45	-0.331302	-2.61691	0	0.000661	0.126	5713	tags=62%, list=29%, signal=88%
MARTORIATI_MDM4_TARGETS_FETAL_LIVER_DN	MARTORIATI_MDM4_TARGETS_FETAL_LIVER_DN		470	-0.104137	-2.6162	0.00204918	0.000658	0.126	14927	tags=86%, list=76%, signal=355%
WIELAND_UP_BY_HBV_INFECTION	WIELAND_UP_BY_HBV_INFECTION		89	-0.234487	-2.61429	0	0.000661	0.127	9072	tags=70%, list=46%, signal=129%
REACTOME_METABOLISM_OF_NUCLEOTIDES	REACTOME_METABOLISM_OF_NUCLEOTIDES		66	-0.272989	-2.61078	0	0.000672	0.13	5058	tags=53%, list=26%, signal=71%
CUI_TCF21_TARGETS_2_UP	CUI_TCF21_TARGETS_2_UP		383	-0.117655	-2.6068	0	0.000689	0.134	6741	tags=46%, list=34%, signal=69%
REACTOME_TELOMERE_MAINTENANCE	REACTOME_TELOMERE_MAINTENANCE		67	-0.276464	-2.60583	0	0.000686	0.134	7466	tags=66%, list=38%, signal=106%
REACTOME_ANTIGEN_PROCESSING_CROSS_PRESENTATION	REACTOME_ANTIGEN_PROCESSING_CROSS_PRESENTATION		63	-0.274987	-2.6039	0	0.000693	0.136	10797	tags=83%, list=55%, signal=183%
REACTOME_RNA_POL_II_TRANSCRIPTION	REACTOME_RNA_POL_II_TRANSCRIPTION		88	-0.240803	-2.60161	0	0.0007	0.137	11329	tags=82%, list=58%, signal=193%
REACTOME_METABOLISM_OF_NON_CODING_RNA	REACTOME_METABOLISM_OF_NON_CODING_RNA		46	-0.328855	-2.59701	0	0.000707	0.139	11882	tags=93%, list=61%, signal=237%
BURTON_ADIPOGENESIS_PEAK_AT_16HR	BURTON_ADIPOGENESIS_PEAK_AT_16HR		39	-0.351929	-2.58873	0	0.000761	0.149	9191	tags=82%, list=47%, signal=154%
GARGALOVIC_RESPONSE_TO_OXIDIZED_PHOSPHOLIPIDS_TURQUOISE_DN	GARGALOVIC_RESPONSE_TO_OXIDIZED_PHOSPHOLIPIDS_TURQUOISE_DN		48	-0.309097	-2.58107	0	0.0008	0.156	9466	tags=79%, list=48%, signal=153%
3UTR_CLIP_CHIP_MSI1	3UTR_CLIP_CHIP_MSI1		257	-0.139119	-2.57875	0	0.000816	0.16	15981	tags=95%, list=82%, signal=511%
REACTOME_APC_C_CDC20_MEDIATED_DEGRADATION_OF_MITOTIC_PROTEINS	REACTOME_APC_C_CDC20_MEDIATED_DEGRADATION_OF_MITOTIC_PROTEINS		61	-0.282318	-2.57614	0	0.000827	0.163	8294	tags=70%, list=42%, signal=122%
REACTOME_ASSEMBLY_OF_THE_PRE_REPLICATIVE_COMPLEX	REACTOME_ASSEMBLY_OF_THE_PRE_REPLICATIVE_COMPLEX		59	-0.28453	-2.57352	0	0.000828	0.164	13365	tags=97%, list=68%, signal=303%
FLOTHO_PEDIATRIC_ALL_THERAPY_RESPONSE_UP	FLOTHO_PEDIATRIC_ALL_THERAPY_RESPONSE_UP		52	-0.309255	-2.57168	0	0.000844	0.168	7895	tags=71%, list=40%, signal=119%
MOHANKUMAR_TLX1_TARGETS_UP	MOHANKUMAR_TLX1_TARGETS_UP		369	-0.115702	-2.56895	0	0.000859	0.171	12160	tags=73%, list=62%, signal=190%
EGUCHI_CELL_CYCLE_RB1_TARGETS	EGUCHI_CELL_CYCLE_RB1_TARGETS		22	-0.457106	-2.56607	0	0.000869	0.174	7082	tags=82%, list=36%, signal=128%
LINDGREN_BLADDER_CANCER_CLUSTER_1_UP	LINDGREN_BLADDER_CANCER_CLUSTER_1_UP		99	-0.216807	-2.56603	0	0.000866	0.174	11997	tags=83%, list=61%, signal=213%
ACEVEDO_LIVER_CANCER_DN	ACEVEDO_LIVER_CANCER_DN		462	-0.102685	-2.55897	0	0.000931	0.187	9355	tags=58%, list=48%, signal=108%
KAUFFMANN_DNA_REPAIR_GENES	KAUFFMANN_DNA_REPAIR_GENES		211	-0.15067	-2.55842	0	0.000932	0.188	12860	tags=81%, list=66%, signal=232%
WAMUNYOKOLI_OVARIAN_CANCER_LMP_UP	WAMUNYOKOLI_OVARIAN_CANCER_LMP_UP		236	-0.141174	-2.5572	0	0.000943	0.19	11791	tags=74%, list=60%, signal=184%
MOOTHA_FFA_OXYDATION	MOOTHA_FFA_OXYDATION		22	-0.454118	-2.55116	0	0.00100689	0.201	10701	tags=100%, list=55%, signal=220%
WU_APOPTOSIS_BY_CDKN1A_VIA_TP53	WU_APOPTOSIS_BY_CDKN1A_VIA_TP53		54	-0.298846	-2.55017	0	0.00100755	0.202	10484	tags=83%, list=54%, signal=179%
DUNNE_TARGETS_OF_AML1_MTG8_FUSION_UP	DUNNE_TARGETS_OF_AML1_MTG8_FUSION_UP		48	-0.31028	-2.5476	0	0.00102175	0.205	7403	tags=69%, list=38%, signal=110%
PECE_MAMMARY_STEM_CELL_UP	PECE_MAMMARY_STEM_CELL_UP		122	-0.195875	-2.54332	0	0.00104965	0.209	10154	tags=71%, list=52%, signal=147%
REACTOME_ER_PHAGOSOME_PATHWAY	REACTOME_ER_PHAGOSOME_PATHWAY		53	-0.300618	-2.54241	0	0.00105024	0.21	10757	tags=85%, list=55%, signal=188%
REACTOME_SYNTHESIS_OF_DNA	REACTOME_SYNTHESIS_OF_DNA		84	-0.237481	-2.54209	0	0.00105071	0.211	10757	tags=79%, list=55%, signal=174%
ROSS_AML_WITH_MLL_FUSIONS	ROSS_AML_WITH_MLL_FUSIONS		70	-0.258141	-2.54035	0	0.00105997	0.214	8672	tags=70%, list=44%, signal=125%
SMIRNOV_RESPONSE_TO_IR_6HR_DN	SMIRNOV_RESPONSE_TO_IR_6HR_DN		102	-0.213925	-2.5273	0	0.00115714	0.233	6201	tags=53%, list=32%, signal=77%
P21_ANY_DN	P21_ANY_DN		28	-0.405249	-2.52583	0	0.00116592	0.235	7463	tags=79%, list=38%, signal=127%
REACTOME_CROSS_PRESENTATION_OF_SOLUBLE_EXOGENOUS_ANTIGENS_ENDOSOMES	REACTOME_CROSS_PRESENTATION_OF_SOLUBLE_EXOGENOUS_ANTIGENS_ENDOSOMES		41	-0.329487	-2.51477	0	0.00126698	0.253	10757	tags=88%, list=55%, signal=194%
REICHERT_MITOSIS_LIN9_TARGETS	REICHERT_MITOSIS_LIN9_TARGETS		26	-0.410923	-2.51318	0	0.00127535	0.255	9288	tags=88%, list=47%, signal=168%
KAUFFMANN_MELANOMA_RELAPSE_UP	KAUFFMANN_MELANOMA_RELAPSE_UP		56	-0.281663	-2.50989	0	0.00128784	0.256	10587	tags=82%, list=54%, signal=178%
BRACHAT_RESPONSE_TO_METHOTREXATE_DN	BRACHAT_RESPONSE_TO_METHOTREXATE_DN		24	-0.425282	-2.50917	0	0.00129172	0.258	9634	tags=92%, list=49%, signal=180%
LY_AGING_MIDDLE_DN	LY_AGING_MIDDLE_DN		16	-0.50888	-2.5039	0	0.00136477	0.27	4731	tags=75%, list=24%, signal=99%
GREENBAUM_E2A_TARGETS_UP	GREENBAUM_E2A_TARGETS_UP		32	-0.360861	-2.49983	0	0.0013988	0.275	8857	tags=81%, list=45%, signal=148%
KEGG_SYSTEMIC_LUPUS_ERYTHEMATOSUS	KEGG_SYSTEMIC_LUPUS_ERYTHEMATOSUS		114	-0.19951	-2.4907	0	0.00150902	0.296	4534	tags=43%, list=23%, signal=56%
KAUFFMANN_DNA_REPLICATION_GENES	KAUFFMANN_DNA_REPLICATION_GENES		132	-0.183106	-2.48913	0	0.00152065	0.298	13352	tags=86%, list=68%, signal=270%
PRAMOONJAGO_SOX4_TARGETS_DN	PRAMOONJAGO_SOX4_TARGETS_DN		48	-0.302799	-2.48636	0	0.00153655	0.301	9997	tags=81%, list=51%, signal=166%
BIOCARTA_PROTEASOME_PATHWAY	BIOCARTA_PROTEASOME_PATHWAY		25	-0.411273	-2.48618	0	0.00153528	0.302	10757	tags=96%, list=55%, signal=213%
NAKAMURA_TUMOR_ZONE_PERIPHERAL_VS_CENTRAL_UP	NAKAMURA_TUMOR_ZONE_PERIPHERAL_VS_CENTRAL_UP		245	-0.138205	-2.48545	0	0.00153405	0.302	12755	tags=79%, list=65%, signal=223%
THILLAINADESAN_ZNF217_TARGETS_UP	THILLAINADESAN_ZNF217_TARGETS_UP		40	-0.338241	-2.48126	0	0.00159534	0.314	8078	tags=75%, list=41%, signal=127%
CREIGHTON_ENDOCRINE_THERAPY_RESISTANCE_4	CREIGHTON_ENDOCRINE_THERAPY_RESISTANCE_4		275	-0.130068	-2.48088	0	0.0015897	0.314	12800	tags=78%, list=65%, signal=223%
BILANGES_SERUM_RESPONSE_TRANSLATION	BILANGES_SERUM_RESPONSE_TRANSLATION		32	-0.369409	-2.46587	0	0.00176403	0.344	6242	tags=69%, list=32%, signal=101%
GROSS_HYPOXIA_VIA_ELK3_UP	GROSS_HYPOXIA_VIA_ELK3_UP		188	-0.151823	-2.46537	0	0.00176623	0.346	10702	tags=70%, list=55%, signal=152%
SENESE_HDAC3_TARGETS_DN	SENESE_HDAC3_TARGETS_DN		466	-0.0988473	-2.46185	0	0.00179703	0.354	13534	tags=79%, list=69%, signal=249%
LIANG_HEMATOPOIESIS_STEM_CELL_NUMBER_LARGE_VS_TINY_UP	LIANG_HEMATOPOIESIS_STEM_CELL_NUMBER_LARGE_VS_TINY_UP		34	-0.353176	-2.45709	0	0.0018529	0.361	8072	tags=76%, list=41%, signal=130%
KEGG_PROTEASOME	KEGG_PROTEASOME		37	-0.343289	-2.45386	0	0.00189181	0.368	10757	tags=89%, list=55%, signal=198%
KARLSSON_TGFB1_TARGETS_UP	KARLSSON_TGFB1_TARGETS_UP		110	-0.203938	-2.44976	0	0.00193073	0.374	10984	tags=76%, list=56%, signal=173%
DUTERTRE_ESTRADIOL_RESPONSE_6HR_UP	DUTERTRE_ESTRADIOL_RESPONSE_6HR_UP		209	-0.146122	-2.44967	0.0019802	0.00192818	0.375	12724	tags=79%, list=65%, signal=224%
ALFANO_MYC_TARGETS	ALFANO_MYC_TARGETS		219	-0.143118	-2.44512	0	0.00197413	0.379	10285	tags=67%, list=53%, signal=139%
MAYBURD_RESPONSE_TO_L663536_DN	MAYBURD_RESPONSE_TO_L663536_DN		51	-0.283751	-2.44413	0	0.00197538	0.381	9818	tags=78%, list=50%, signal=157%
WELCSH_BRCA1_TARGETS_UP	WELCSH_BRCA1_TARGETS_UP		186	-0.152087	-2.44114	0	0.00199341	0.387	13686	tags=85%, list=70%, signal=279%
BRUINS_UVC_RESPONSE_EARLY_LATE	BRUINS_UVC_RESPONSE_EARLY_LATE		276	-0.125098	-2.43626	0	0.00204715	0.399	15253	tags=90%, list=78%, signal=402%
REACTOME_PURINE_METABOLISM	REACTOME_PURINE_METABOLISM		32	-0.368902	-2.43613	0	0.00204436	0.399	4416	tags=59%, list=23%, signal=77%
ELVIDGE_HYPOXIA_DN	ELVIDGE_HYPOXIA_DN		130	-0.180844	-2.43454	0	0.00205344	0.402	12752	tags=83%, list=65%, signal=237%
HOLLEMAN_ASPARAGINASE_RESISTANCE_B_ALL_UP	HOLLEMAN_ASPARAGINASE_RESISTANCE_B_ALL_UP		24	-0.42084	-2.432	0	0.00209055	0.407	7273	tags=79%, list=37%, signal=126%
REACTOME_ORC1_REMOVAL_FROM_CHROMATIN	REACTOME_ORC1_REMOVAL_FROM_CHROMATIN		60	-0.260652	-2.41872	0	0.00229478	0.44	8294	tags=68%, list=42%, signal=118%
TAKAO_RESPONSE_TO_UVB_RADIATION_UP	TAKAO_RESPONSE_TO_UVB_RADIATION_UP		78	-0.234048	-2.41517	0.00204918	0.00232652	0.447	11504	tags=82%, list=59%, signal=198%
SHEPARD_CRUSH_AND_BURN_MUTANT_DN	SHEPARD_CRUSH_AND_BURN_MUTANT_DN		163	-0.159582	-2.41439	0.00411523	0.00234654	0.45	10598	tags=70%, list=54%, signal=151%
MOLENAAR_TARGETS_OF_CCND1_AND_CDK4_DN	MOLENAAR_TARGETS_OF_CCND1_AND_CDK4_DN		49	-0.293105	-2.40889	0	0.00246903	0.469	8663	tags=73%, list=44%, signal=131%
REACTOME_APC_C_CDH1_MEDIATED_DEGRADATION_OF_CDC20_AND_OTHER_APC_C_CDH1_TARGETED_PROTEINS_IN_LATE_MITOSIS_EARLY_G1	REACTOME_APC_C_CDH1_MEDIATED_DEGRADATION_OF_CDC20_AND_OTHER_APC_C_CDH1_TARGETED_PROTEINS_IN_LATE_MITOSIS_EARLY_G1		60	-0.268394	-2.40679	0.00194553	0.00248455	0.472	13365	tags=95%, list=68%, signal=298%
FERRANDO_T_ALL_WITH_MLL_ENL_FUSION_DN	FERRANDO_T_ALL_WITH_MLL_ENL_FUSION_DN		80	-0.228515	-2.40379	0	0.00251954	0.478	8518	tags=66%, list=43%, signal=117%
MOREAUX_B_LYMPHOCYTE_MATURATION_BY_TACI_DN	MOREAUX_B_LYMPHOCYTE_MATURATION_BY_TACI_DN		62	-0.254825	-2.40059	0	0.00259317	0.487	13662	tags=95%, list=70%, signal=314%
WHITFIELD_CELL_CYCLE_G1_S	WHITFIELD_CELL_CYCLE_G1_S		122	-0.183841	-2.39965	0	0.00260416	0.491	8462	tags=61%, list=43%, signal=108%
MARKEY_RB1_ACUTE_LOF_DN	MARKEY_RB1_ACUTE_LOF_DN		199	-0.147201	-2.39857	0	0.00259944	0.491	13188	tags=82%, list=67%, signal=248%
ODONNELL_TARGETS_OF_MYC_AND_TFRC_DN	ODONNELL_TARGETS_OF_MYC_AND_TFRC_DN		42	-0.31262	-2.39564	0	0.00264511	0.501	9745	tags=81%, list=50%, signal=161%
SASAKI_ADULT_T_CELL_LEUKEMIA	SASAKI_ADULT_T_CELL_LEUKEMIA		162	-0.158962	-2.39529	0	0.00264042	0.501	5980	tags=46%, list=31%, signal=66%
RIZ_ERYTHROID_DIFFERENTIATION	RIZ_ERYTHROID_DIFFERENTIATION		71	-0.241056	-2.39383	0	0.00266667	0.506	9640	tags=73%, list=49%, signal=144%
CROONQUIST_NRAS_VS_STROMAL_STIMULATION_DN	CROONQUIST_NRAS_VS_STROMAL_STIMULATION_DN		96	-0.208672	-2.39053	0	0.00271559	0.513	7970	tags=61%, list=41%, signal=103%
DARWICHE_PAPILLOMA_RISK_LOW_UP	DARWICHE_PAPILLOMA_RISK_LOW_UP		133	-0.17292	-2.38094	0	0.00288239	0.53	7828	tags=57%, list=40%, signal=95%
HU_ANGIOGENESIS_DN	HU_ANGIOGENESIS_DN		35	-0.331486	-2.37855	0	0.00292232	0.535	8628	tags=77%, list=44%, signal=138%
MEISSNER_BRAIN_HCP_WITH_H3K27ME3	MEISSNER_BRAIN_HCP_WITH_H3K27ME3		209	-0.140582	-2.37622	0	0.00295072	0.54	2056	tags=24%, list=10%, signal=27%
WANG_TUMOR_INVASIVENESS_DN	WANG_TUMOR_INVASIVENESS_DN		197	-0.14716	-2.36858	0	0.00308506	0.556	11065	tags=71%, list=57%, signal=162%
BENPORATH_OCT4_TARGETS	BENPORATH_OCT4_TARGETS		261	-0.127492	-2.36406	0	0.00319935	0.572	13219	tags=80%, list=68%, signal=243%
LIAO_METASTASIS	LIAO_METASTASIS		481	-0.0955845	-2.36387	0.00407332	0.00319672	0.573	12954	tags=75%, list=66%, signal=217%
BASSO_B_LYMPHOCYTE_NETWORK	BASSO_B_LYMPHOCYTE_NETWORK		126	-0.180831	-2.36366	0	0.00319413	0.575	13268	tags=86%, list=68%, signal=264%
REACTOME_DESTABILIZATION_OF_MRNA_BY_AUF1_HNRNP_D0	REACTOME_DESTABILIZATION_OF_MRNA_BY_AUF1_HNRNP_D0		45	-0.295872	-2.35548	0	0.00340786	0.593	10757	tags=84%, list=55%, signal=187%
DARWICHE_SKIN_TUMOR_PROMOTER_UP	DARWICHE_SKIN_TUMOR_PROMOTER_UP		123	-0.179987	-2.35519	0	0.00340468	0.594	9713	tags=67%, list=50%, signal=133%
RAMALHO_STEMNESS_UP	RAMALHO_STEMNESS_UP		187	-0.142893	-2.35458	0	0.0034015	0.594	14718	tags=89%, list=75%, signal=356%
REACTOME_SIGNALING_BY_WNT	REACTOME_SIGNALING_BY_WNT		58	-0.261869	-2.35276	0.0019305	0.00345405	0.602	10757	tags=81%, list=55%, signal=179%
YAMAZAKI_TCEB3_TARGETS_DN	YAMAZAKI_TCEB3_TARGETS_DN		191	-0.144874	-2.35275	0.00376648	0.00344332	0.602	11033	tags=71%, list=56%, signal=160%
NADLER_OBESITY_UP	NADLER_OBESITY_UP		58	-0.264461	-2.34836	0.002	0.00352834	0.612	7330	tags=64%, list=37%, signal=102%
BHATTACHARYA_EMBRYONIC_STEM_CELL	BHATTACHARYA_EMBRYONIC_STEM_CELL		81	-0.221183	-2.34175	0	0.0036939	0.622	11644	tags=81%, list=59%, signal=200%
SHEPARD_CRUSH_AND_BURN_MUTANT_UP	SHEPARD_CRUSH_AND_BURN_MUTANT_UP		171	-0.154658	-2.34066	0	0.00373389	0.627	12230	tags=78%, list=62%, signal=205%
REACTOME_CDT1_ASSOCIATION_WITH_THE_CDC6_ORC_ORIGIN_COMPLEX	REACTOME_CDT1_ASSOCIATION_WITH_THE_CDC6_ORC_ORIGIN_COMPLEX		50	-0.278282	-2.33673	0	0.00383861	0.641	13365	tags=96%, list=68%, signal=302%
REACTOME_SCF_BETA_TRCP_MEDIATED_DEGRADATION_OF_EMI1	REACTOME_SCF_BETA_TRCP_MEDIATED_DEGRADATION_OF_EMI1		45	-0.295872	-2.33407	0.00200803	0.00390336	0.65	10757	tags=84%, list=55%, signal=187%
REACTOME_CDK_MEDIATED_PHOSPHORYLATION_AND_REMOVAL_OF_CDC6	REACTOME_CDK_MEDIATED_PHOSPHORYLATION_AND_REMOVAL_OF_CDC6		41	-0.305045	-2.33352	0	0.00390239	0.652	10757	tags=85%, list=55%, signal=189%
BYSTRYKH_HEMATOPOIESIS_STEM_CELL_QTL_CIS	BYSTRYKH_HEMATOPOIESIS_STEM_CELL_QTL_CIS		108	-0.190921	-2.33259	0	0.00391927	0.653	12058	tags=81%, list=62%, signal=208%
CHICAS_RB1_TARGETS_SENESCENT	CHICAS_RB1_TARGETS_SENESCENT		500	-0.0895264	-2.32914	0	0.00399018	0.662	12079	tags=70%, list=62%, signal=179%
REACTOME_TRNA_AMINOACYLATION	REACTOME_TRNA_AMINOACYLATION		41	-0.299411	-2.3274	0.00204918	0.00401028	0.667	12300	tags=93%, list=63%, signal=249%
KAAB_HEART_ATRIUM_VS_VENTRICLE_DN	KAAB_HEART_ATRIUM_VS_VENTRICLE_DN		247	-0.132106	-2.32426	0	0.0040843	0.676	13224	tags=81%, list=68%, signal=245%
REACTOME_MITOCHONDRIAL_PROTEIN_IMPORT	REACTOME_MITOCHONDRIAL_PROTEIN_IMPORT		46	-0.287615	-2.32368	0	0.00408624	0.679	12262	tags=91%, list=63%, signal=244%
FOSTER_KDM1A_TARGETS_DN	FOSTER_KDM1A_TARGETS_DN		177	-0.149518	-2.32295	0	0.00409904	0.681	11925	tags=76%, list=61%, signal=192%
REACTOME_DNA_REPAIR	REACTOME_DNA_REPAIR		98	-0.199763	-2.32246	0	0.00411157	0.682	14093	tags=92%, list=72%, signal=326%
AGUIRRE_PANCREATIC_CANCER_COPY_NUMBER_UP	AGUIRRE_PANCREATIC_CANCER_COPY_NUMBER_UP		263	-0.123558	-2.31981	0.00194175	0.00420515	0.688	10421	tags=65%, list=53%, signal=138%
DAZARD_UV_RESPONSE_CLUSTER_G6	DAZARD_UV_RESPONSE_CLUSTER_G6		136	-0.171855	-2.31929	0.00204499	0.0042101	0.689	15090	tags=94%, list=77%, signal=407%
RAO_BOUND_BY_SALL4_ISOFORM_B	RAO_BOUND_BY_SALL4_ISOFORM_B		456	-0.0957616	-2.31725	0.00200401	0.00427526	0.696	15691	tags=89%, list=80%, signal=440%
GAZDA_DIAMOND_BLACKFAN_ANEMIA_ERYTHROID_DN	GAZDA_DIAMOND_BLACKFAN_ANEMIA_ERYTHROID_DN		437	-0.0955689	-2.31442	0	0.00433972	0.707	13990	tags=81%, list=71%, signal=277%
DAZARD_RESPONSE_TO_UV_NHEK_UP	DAZARD_RESPONSE_TO_UV_NHEK_UP		219	-0.133906	-2.31253	0.00187266	0.00436905	0.71	6976	tags=49%, list=36%, signal=75%
REACTOME_MITOTIC_G2_G2_M_PHASES	REACTOME_MITOTIC_G2_G2_M_PHASES		75	-0.225311	-2.31174	0.00215054	0.004391	0.711	13622	tags=92%, list=70%, signal=301%
SHIN_B_CELL_LYMPHOMA_CLUSTER_3	SHIN_B_CELL_LYMPHOMA_CLUSTER_3		24	-0.380956	-2.3113	0.0040404	0.00439545	0.712	9685	tags=88%, list=49%, signal=173%
JIANG_HYPOXIA_NORMAL	JIANG_HYPOXIA_NORMAL		278	-0.119393	-2.30745	0	0.00451012	0.723	13757	tags=82%, list=70%, signal=272%
ZHONG_RESPONSE_TO_AZACITIDINE_AND_TSA_DN	ZHONG_RESPONSE_TO_AZACITIDINE_AND_TSA_DN		60	-0.252137	-2.30697	0.00201613	0.00450381	0.723	13356	tags=93%, list=68%, signal=293%
PID_PLK1_PATHWAY	PID_PLK1_PATHWAY		41	-0.298993	-2.3063	0	0.00451835	0.724	9920	tags=80%, list=51%, signal=163%
YAO_TEMPORAL_RESPONSE_TO_PROGESTERONE_CLUSTER_12	YAO_TEMPORAL_RESPONSE_TO_PROGESTERONE_CLUSTER_12		70	-0.238387	-2.3056	0	0.0045328	0.724	10736	tags=79%, list=55%, signal=173%
SAKAI_TUMOR_INFILTRATING_MONOCYTES_DN	SAKAI_TUMOR_INFILTRATING_MONOCYTES_DN		75	-0.225756	-2.30126	0.00198807	0.00464928	0.736	12830	tags=88%, list=66%, signal=254%
JIANG_VHL_TARGETS	JIANG_VHL_TARGETS		125	-0.177634	-2.29932	0	0.00470125	0.739	11741	tags=78%, list=60%, signal=193%
STEIN_ESR1_TARGETS	STEIN_ESR1_TARGETS		78	-0.21654	-2.29327	0	0.00488907	0.755	13854	tags=92%, list=71%, signal=314%
POOLA_INVASIVE_BREAST_CANCER_UP	POOLA_INVASIVE_BREAST_CANCER_UP		241	-0.123876	-2.28934	0	0.00501415	0.767	6137	tags=44%, list=31%, signal=63%
TIEN_INTESTINE_PROBIOTICS_2HR_UP	TIEN_INTESTINE_PROBIOTICS_2HR_UP		26	-0.381646	-2.28909	0.00186567	0.0050067	0.767	7601	tags=77%, list=39%, signal=126%
REACTOME_VIF_MEDIATED_DEGRADATION_OF_APOBEC3G	REACTOME_VIF_MEDIATED_DEGRADATION_OF_APOBEC3G		43	-0.288591	-2.28891	0.00198413	0.00499583	0.768	10757	tags=84%, list=55%, signal=185%
SHEPARD_BMYB_MORPHOLINO_DN	SHEPARD_BMYB_MORPHOLINO_DN		180	-0.148094	-2.28617	0	0.00507579	0.777	7463	tags=53%, list=38%, signal=84%
PID_FANCONI_PATHWAY	PID_FANCONI_PATHWAY		43	-0.297752	-2.28529	0.002079	0.00509834	0.78	10578	tags=84%, list=54%, signal=182%
MORI_MATURE_B_LYMPHOCYTE_DN	MORI_MATURE_B_LYMPHOCYTE_DN		71	-0.234347	-2.28226	0.00204918	0.00520786	0.792	8116	tags=65%, list=41%, signal=110%
BERENJENO_TRANSFORMED_BY_RHOA_DN	BERENJENO_TRANSFORMED_BY_RHOA_DN		352	-0.104022	-2.27846	0	0.00535679	0.804	9016	tags=56%, list=46%, signal=102%
ZAMORA_NOS2_TARGETS_UP	ZAMORA_NOS2_TARGETS_UP		61	-0.251163	-2.27786	0	0.00535838	0.804	6976	tags=61%, list=36%, signal=94%
WHITFIELD_CELL_CYCLE_G2_M	WHITFIELD_CELL_CYCLE_G2_M		191	-0.13877	-2.27782	0	0.00534342	0.804	13407	tags=82%, list=68%, signal=258%
SANA_RESPONSE_TO_IFNG_DN	SANA_RESPONSE_TO_IFNG_DN		75	-0.221093	-2.27468	0.002	0.00545688	0.814	10571	tags=76%, list=54%, signal=165%
LY_AGING_OLD_DN	LY_AGING_OLD_DN		53	-0.262708	-2.27203	0	0.00558364	0.82	7433	tags=64%, list=38%, signal=103%
BLUM_RESPONSE_TO_SALIRASIB_UP	BLUM_RESPONSE_TO_SALIRASIB_UP		229	-0.132233	-2.27198	0.00215983	0.00557147	0.82	15571	tags=93%, list=80%, signal=447%
KEGG_CELL_CYCLE	KEGG_CELL_CYCLE		118	-0.180361	-2.27073	0.0020284	0.00559525	0.823	13252	tags=86%, list=68%, signal=263%
MORI_EMU_MYC_LYMPHOMA_BY_ONSET_TIME_UP	MORI_EMU_MYC_LYMPHOMA_BY_ONSET_TIME_UP		94	-0.20169	-2.27071	0	0.00557984	0.823	11070	tags=77%, list=57%, signal=175%
REACTOME_REGULATION_OF_ORNITHINE_DECARBOXYLASE_ODC	REACTOME_REGULATION_OF_ORNITHINE_DECARBOXYLASE_ODC		43	-0.288591	-2.27061	0.00421053	0.00556451	0.823	10757	tags=84%, list=55%, signal=185%
SCHLOSSER_SERUM_RESPONSE_AUGMENTED_BY_MYC	SCHLOSSER_SERUM_RESPONSE_AUGMENTED_BY_MYC		97	-0.198442	-2.26798	0	0.00564015	0.829	10670	tags=74%, list=54%, signal=162%
LAIHO_COLORECTAL_CANCER_SERRATED_UP	LAIHO_COLORECTAL_CANCER_SERRATED_UP		103	-0.19106	-2.26699	0	0.00564759	0.829	11109	tags=76%, list=57%, signal=174%
BARRIER_CANCER_RELAPSE_TUMOR_SAMPLE_UP	BARRIER_CANCER_RELAPSE_TUMOR_SAMPLE_UP		15	-0.4838	-2.26472	0.0020202	0.00569715	0.831	10117	tags=100%, list=52%, signal=207%
BENPORATH_MYC_TARGETS_WITH_EBOX	BENPORATH_MYC_TARGETS_WITH_EBOX		209	-0.13763	-2.26408	0.0020284	0.00570087	0.832	7454	tags=52%, list=38%, signal=83%
LUI_TARGETS_OF_PAX8_PPARG_FUSION	LUI_TARGETS_OF_PAX8_PPARG_FUSION		33	-0.330983	-2.26295	0	0.00573688	0.834	11333	tags=91%, list=58%, signal=215%
WINTER_HYPOXIA_METAGENE	WINTER_HYPOXIA_METAGENE		217	-0.130298	-2.26138	0	0.00579158	0.836	7585	tags=52%, list=39%, signal=83%
SANSOM_APC_TARGETS_REQUIRE_MYC	SANSOM_APC_TARGETS_REQUIRE_MYC		183	-0.145072	-2.26016	0.00408163	0.00582743	0.84	10777	tags=69%, list=55%, signal=153%
GINESTIER_BREAST_CANCER_ZNF217_AMPLIFIED_DN	GINESTIER_BREAST_CANCER_ZNF217_AMPLIFIED_DN		294	-0.112179	-2.25726	0.00612245	0.00590118	0.845	13024	tags=78%, list=67%, signal=228%
HESS_TARGETS_OF_HOXA9_AND_MEIS1_UP	HESS_TARGETS_OF_HOXA9_AND_MEIS1_UP		60	-0.252133	-2.25712	0.00193424	0.00589167	0.845	10745	tags=80%, list=55%, signal=177%
SCHLOSSER_MYC_TARGETS_AND_SERUM_RESPONSE_UP	SCHLOSSER_MYC_TARGETS_AND_SERUM_RESPONSE_UP		43	-0.292588	-2.25558	0	0.00595503	0.846	12956	tags=95%, list=66%, signal=281%
KEGG_ALZHEIMERS_DISEASE	KEGG_ALZHEIMERS_DISEASE		142	-0.164625	-2.25256	0	0.00605978	0.851	11143	tags=73%, list=57%, signal=169%
PEART_HDAC_PROLIFERATION_CLUSTER_DN	PEART_HDAC_PROLIFERATION_CLUSTER_DN		68	-0.237105	-2.24788	0.00392927	0.00621752	0.86	12941	tags=90%, list=66%, signal=264%
LEE_AGING_NEOCORTEX_UP	LEE_AGING_NEOCORTEX_UP		81	-0.20856	-2.24709	0	0.00624235	0.86	8989	tags=67%, list=46%, signal=123%
ZHAN_VARIABLE_EARLY_DIFFERENTIATION_GENES_DN	ZHAN_VARIABLE_EARLY_DIFFERENTIATION_GENES_DN		30	-0.349716	-2.24698	0.00195695	0.00622889	0.86	12746	tags=100%, list=65%, signal=286%
JAIN_NFKB_SIGNALING	JAIN_NFKB_SIGNALING		69	-0.233131	-2.24579	0.00194553	0.00625925	0.861	13048	tags=90%, list=67%, signal=268%
DAIRKEE_CANCER_PRONE_RESPONSE_BPA_E2	DAIRKEE_CANCER_PRONE_RESPONSE_BPA_E2		104	-0.190649	-2.24254	0.00206612	0.00641464	0.865	10598	tags=73%, list=54%, signal=158%
RODWELL_AGING_KIDNEY_UP	RODWELL_AGING_KIDNEY_UP		414	-0.09359	-2.23874	0	0.00654421	0.872	6201	tags=41%, list=32%, signal=58%
REACTOME_P53_INDEPENDENT_G1_S_DNA_DAMAGE_CHECKPOINT	REACTOME_P53_INDEPENDENT_G1_S_DNA_DAMAGE_CHECKPOINT		44	-0.293443	-2.23809	0	0.00657377	0.874	11180	tags=86%, list=57%, signal=201%
YOSHIMURA_MAPK8_TARGETS_DN	YOSHIMURA_MAPK8_TARGETS_DN		339	-0.106867	-2.23743	0	0.00657222	0.875	15159	tags=88%, list=77%, signal=382%
EPPERT_PROGENITOR	EPPERT_PROGENITOR		123	-0.17393	-2.23622	0	0.00660168	0.876	14448	tags=91%, list=74%, signal=345%
TIEN_INTESTINE_PROBIOTICS_6HR_DN	TIEN_INTESTINE_PROBIOTICS_6HR_DN		151	-0.152717	-2.23518	0.00205339	0.00665228	0.879	14282	tags=88%, list=73%, signal=323%
ABRAMSON_INTERACT_WITH_AIRE	ABRAMSON_INTERACT_WITH_AIRE		42	-0.298981	-2.23176	0	0.00681401	0.886	9079	tags=76%, list=46%, signal=142%
PROVENZANI_METASTASIS_UP	PROVENZANI_METASTASIS_UP		168	-0.146408	-2.2304	0.00203666	0.00686668	0.888	12312	tags=77%, list=63%, signal=207%
MARTORIATI_MDM4_TARGETS_NEUROEPITHELIUM_UP	MARTORIATI_MDM4_TARGETS_NEUROEPITHELIUM_UP		155	-0.15115	-2.22905	0	0.00689489	0.89	9825	tags=65%, list=50%, signal=130%
MATSUDA_NATURAL_KILLER_DIFFERENTIATION	MATSUDA_NATURAL_KILLER_DIFFERENTIATION		426	-0.0918353	-2.22886	0	0.00688323	0.89	14377	tags=82%, list=73%, signal=303%
REACTOME_PACKAGING_OF_TELOMERE_ENDS	REACTOME_PACKAGING_OF_TELOMERE_ENDS		41	-0.288179	-2.22838	0	0.00687174	0.89	5355	tags=56%, list=27%, signal=77%
LINDGREN_BLADDER_CANCER_WITH_LOH_IN_CHR9Q	LINDGREN_BLADDER_CANCER_WITH_LOH_IN_CHR9Q		99	-0.189702	-2.22816	0	0.00686336	0.89	14701	tags=94%, list=75%, signal=375%
LANG_MYB_FAMILY_TARGETS	LANG_MYB_FAMILY_TARGETS		29	-0.335476	-2.22194	0.00575816	0.00710614	0.901	10323	tags=86%, list=53%, signal=182%
KEGG_OLFACTORY_TRANSDUCTION	KEGG_OLFACTORY_TRANSDUCTION		72	-0.22319	-2.21545	0.00194932	0.00737456	0.908	2174	tags=33%, list=11%, signal=37%
REACTOME_SCFSKP2_MEDIATED_DEGRADATION_OF_P27_P21	REACTOME_SCFSKP2_MEDIATED_DEGRADATION_OF_P27_P21		48	-0.264669	-2.20037	0.00204082	0.00825217	0.926	8294	tags=69%, list=42%, signal=119%
KIM_WT1_TARGETS_DN	KIM_WT1_TARGETS_DN		407	-0.0930988	-2.1979	0.002	0.00839665	0.929	14575	tags=84%, list=74%, signal=320%
REACTOME_CYTOSOLIC_TRNA_AMINOACYLATION	REACTOME_CYTOSOLIC_TRNA_AMINOACYLATION		24	-0.372412	-2.19652	0.00411523	0.00848902	0.932	12300	tags=100%, list=63%, signal=269%
REACTOME_AUTODEGRADATION_OF_CDH1_BY_CDH1_APC_C	REACTOME_AUTODEGRADATION_OF_CDH1_BY_CDH1_APC_C		52	-0.260571	-2.19592	0	0.00847963	0.932	13365	tags=94%, list=68%, signal=296%
MASSARWEH_TAMOXIFEN_RESISTANCE_DN	MASSARWEH_TAMOXIFEN_RESISTANCE_DN		222	-0.131069	-2.18981	0.00197239	0.00880338	0.947	12724	tags=78%, list=65%, signal=220%
GRUETZMANN_PANCREATIC_CANCER_UP	GRUETZMANN_PANCREATIC_CANCER_UP		328	-0.104239	-2.18802	0	0.0089032	0.948	10890	tags=66%, list=56%, signal=146%
DING_LUNG_CANCER_EXPRESSION_BY_COPY_NUMBER	DING_LUNG_CANCER_EXPRESSION_BY_COPY_NUMBER		94	-0.189064	-2.18583	0.0020202	0.00899957	0.949	15691	tags=99%, list=80%, signal=495%
P21_P53_ANY_DN	P21_P53_ANY_DN		34	-0.318182	-2.18355	0	0.00910722	0.952	10484	tags=85%, list=54%, signal=183%
GAL_LEUKEMIC_STEM_CELL_DN	GAL_LEUKEMIC_STEM_CELL_DN		160	-0.146458	-2.17469	0	0.00965418	0.959	7927	tags=55%, list=40%, signal=92%
KEGG_PROTEIN_EXPORT	KEGG_PROTEIN_EXPORT		22	-0.391677	-2.17415	0.00387597	0.00966281	0.959	9252	tags=86%, list=47%, signal=164%
REACTOME_TRANSPORT_OF_MATURE_MRNA_DERIVED_FROM_AN_INTRONLESS_TRANSCRIPT	REACTOME_TRANSPORT_OF_MATURE_MRNA_DERIVED_FROM_AN_INTRONLESS_TRANSCRIPT		31	-0.329305	-2.17375	0.00401606	0.00966252	0.959	11882	tags=94%, list=61%, signal=238%
SESTO_RESPONSE_TO_UV_C7	SESTO_RESPONSE_TO_UV_C7		61	-0.240018	-2.16981	0.00194553	0.00988548	0.962	11367	tags=82%, list=58%, signal=195%
PID_BARD1_PATHWAY	PID_BARD1_PATHWAY		27	-0.349259	-2.16973	0	0.00986693	0.962	10578	tags=89%, list=54%, signal=193%
REACTOME_PROCESSING_OF_CAPPED_INTRONLESS_PRE_MRNA	REACTOME_PROCESSING_OF_CAPPED_INTRONLESS_PRE_MRNA		23	-0.378994	-2.16718	0.00193798	0.00998834	0.964	10468	tags=91%, list=53%, signal=196%
YAO_TEMPORAL_RESPONSE_TO_PROGESTERONE_CLUSTER_10	YAO_TEMPORAL_RESPONSE_TO_PROGESTERONE_CLUSTER_10		61	-0.232231	-2.16431	0	0.0101795	0.965	11198	tags=80%, list=57%, signal=187%
LEI_MYB_TARGETS	LEI_MYB_TARGETS		291	-0.108896	-2.16196	0	0.0102971	0.966	6514	tags=44%, list=33%, signal=65%
E2F3_BILD	E2F3_BILD		155	-0.149546	-2.15869	0	0.0104741	0.967	7582	tags=54%, list=39%, signal=87%
BENPORATH_ES_CORE_NINE_CORRELATED	BENPORATH_ES_CORE_NINE_CORRELATED		93	-0.188275	-2.15722	0.00191939	0.010564	0.969	9808	tags=69%, list=50%, signal=137%
AFFAR_YY1_TARGETS_DN	AFFAR_YY1_TARGETS_DN		214	-0.127508	-2.15606	0	0.010628	0.97	9336	tags=60%, list=48%, signal=114%
SANSOM_APC_MYC_TARGETS	SANSOM_APC_MYC_TARGETS		188	-0.13588	-2.15414	0.006	0.0107437	0.971	13407	tags=82%, list=68%, signal=257%
FONTAINE_THYROID_TUMOR_UNCERTAIN_MALIGNANCY_DN	FONTAINE_THYROID_TUMOR_UNCERTAIN_MALIGNANCY_DN		24	-0.366854	-2.15144	0.00199601	0.0109099	0.973	6697	tags=71%, list=34%, signal=108%
LUI_THYROID_CANCER_CLUSTER_3	LUI_THYROID_CANCER_CLUSTER_3		27	-0.35082	-2.15076	0.00397614	0.0109347	0.973	6921	tags=70%, list=35%, signal=109%
WANG_CLASSIC_ADIPOGENIC_TARGETS_OF_PPARG	WANG_CLASSIC_ADIPOGENIC_TARGETS_OF_PPARG		25	-0.360043	-2.15043	0.00392927	0.0109371	0.973	9409	tags=84%, list=48%, signal=161%
HOLLEMAN_VINCRISTINE_RESISTANCE_ALL_DN	HOLLEMAN_VINCRISTINE_RESISTANCE_ALL_DN		17	-0.432283	-2.14821	0.00389864	0.0110425	0.974	9974	tags=94%, list=51%, signal=192%
REACTOME_REGULATION_OF_APOPTOSIS	REACTOME_REGULATION_OF_APOPTOSIS		52	-0.247033	-2.14534	0.00388349	0.0112462	0.976	14006	tags=96%, list=72%, signal=337%
SCIBETTA_KDM5B_TARGETS_DN	SCIBETTA_KDM5B_TARGETS_DN		72	-0.210611	-2.1427	0	0.0114404	0.976	11123	tags=78%, list=57%, signal=179%
REACTOME_ASPARAGINE_N_LINKED_GLYCOSYLATION	REACTOME_ASPARAGINE_N_LINKED_GLYCOSYLATION		77	-0.207873	-2.14126	0	0.0115033	0.976	12223	tags=83%, list=62%, signal=220%
REACTOME_CHROMOSOME_MAINTENANCE	REACTOME_CHROMOSOME_MAINTENANCE		106	-0.179191	-2.13553	0.00373832	0.011936	0.98	12399	tags=81%, list=63%, signal=220%
RUIZ_TNC_TARGETS_DN	RUIZ_TNC_TARGETS_DN		133	-0.157488	-2.13325	0.00211416	0.0120765	0.981	10484	tags=69%, list=54%, signal=148%
ACOSTA_PROLIFERATION_INDEPENDENT_MYC_TARGETS_UP	ACOSTA_PROLIFERATION_INDEPENDENT_MYC_TARGETS_UP		68	-0.216924	-2.13314	0.00198807	0.0120536	0.981	10167	tags=74%, list=52%, signal=152%
WIERENGA_PML_INTERACTOME	WIERENGA_PML_INTERACTOME		40	-0.282475	-2.13036	0.0019305	0.0122021	0.984	10147	tags=80%, list=52%, signal=166%
KEGG_HUNTINGTONS_DISEASE	KEGG_HUNTINGTONS_DISEASE		161	-0.141173	-2.12905	0.00402414	0.0122597	0.985	11247	tags=71%, list=57%, signal=166%
REACTOME_ELONGATION_ARREST_AND_RECOVERY	REACTOME_ELONGATION_ARREST_AND_RECOVERY		22	-0.375376	-2.12607	0.00211864	0.0124794	0.986	10461	tags=91%, list=53%, signal=195%
JUBAN_TARGETS_OF_SPI1_AND_FLI1_DN	JUBAN_TARGETS_OF_SPI1_AND_FLI1_DN		76	-0.205953	-2.12531	0.00194932	0.0125087	0.986	7321	tags=58%, list=37%, signal=92%
LOCKWOOD_AMPLIFIED_IN_LUNG_CANCER	LOCKWOOD_AMPLIFIED_IN_LUNG_CANCER		191	-0.132949	-2.12334	0.0040568	0.0126239	0.987	12187	tags=75%, list=62%, signal=198%
BYSTROEM_CORRELATED_WITH_IL5_DN	BYSTROEM_CORRELATED_WITH_IL5_DN		58	-0.237597	-2.12264	0.00423729	0.0126443	0.987	13932	tags=95%, list=71%, signal=328%
NOUZOVA_TRETINOIN_AND_H4_ACETYLATION	NOUZOVA_TRETINOIN_AND_H4_ACETYLATION		124	-0.163135	-2.11917	0.00190476	0.0128689	0.988	15462	tags=95%, list=79%, signal=449%
KYNG_RESPONSE_TO_H2O2	KYNG_RESPONSE_TO_H2O2		65	-0.22204	-2.11878	0.00407332	0.012883	0.988	12840	tags=88%, list=66%, signal=254%
ZHENG_BOUND_BY_FOXP3	ZHENG_BOUND_BY_FOXP3		451	-0.0873428	-2.11849	0	0.0128723	0.988	15959	tags=90%, list=81%, signal=475%
KARLSSON_TGFB1_TARGETS_DN	KARLSSON_TGFB1_TARGETS_DN		189	-0.134514	-2.11796	0.00189753	0.0128838	0.988	12209	tags=76%, list=62%, signal=199%
PELLICCIOTTA_HDAC_IN_ANTIGEN_PRESENTATION_UP	PELLICCIOTTA_HDAC_IN_ANTIGEN_PRESENTATION_UP		58	-0.232038	-2.11653	0.00568182	0.0129856	0.989	12690	tags=88%, list=65%, signal=249%
PID_MYC_ACTIV_PATHWAY	PID_MYC_ACTIV_PATHWAY		73	-0.212126	-2.11556	0.00407332	0.0130296	0.989	10885	tags=77%, list=56%, signal=172%
REACTOME_G2_M_CHECKPOINTS	REACTOME_G2_M_CHECKPOINTS		40	-0.277841	-2.11544	0.00194553	0.0130079	0.989	13175	tags=95%, list=67%, signal=290%
LUI_THYROID_CANCER_PAX8_PPARG_DN	LUI_THYROID_CANCER_PAX8_PPARG_DN		42	-0.279076	-2.11357	0.0059761	0.0131683	0.989	11333	tags=86%, list=58%, signal=203%
MCBRYAN_PUBERTAL_BREAST_6_7WK_UP	MCBRYAN_PUBERTAL_BREAST_6_7WK_UP		182	-0.132707	-2.11153	0.00403226	0.0133034	0.99	12813	tags=79%, list=65%, signal=225%
NAKAYAMA_SOFT_TISSUE_TUMORS_PCA2_UP	NAKAYAMA_SOFT_TISSUE_TUMORS_PCA2_UP		81	-0.201441	-2.11081	0.00420168	0.0133138	0.99	7919	tags=60%, list=40%, signal=101%
REACTOME_CYCLIN_E_ASSOCIATED_EVENTS_DURING_G1_S_TRANSITION_	REACTOME_CYCLIN_E_ASSOCIATED_EVENTS_DURING_G1_S_TRANSITION_		57	-0.243919	-2.10759	0	0.0135258	0.99	13447	tags=93%, list=69%, signal=296%
ZHOU_TNF_SIGNALING_4HR	ZHOU_TNF_SIGNALING_4HR		51	-0.254209	-2.10734	0	0.0135085	0.99	10395	tags=78%, list=53%, signal=167%
YAGI_AML_WITH_INV_16_TRANSLOCATION	YAGI_AML_WITH_INV_16_TRANSLOCATION		383	-0.0928009	-2.10518	0.00990099	0.0136577	0.99	15757	tags=90%, list=80%, signal=449%
YAO_TEMPORAL_RESPONSE_TO_PROGESTERONE_CLUSTER_11	YAO_TEMPORAL_RESPONSE_TO_PROGESTERONE_CLUSTER_11		86	-0.187966	-2.10512	0.00823045	0.0136296	0.99	12959	tags=85%, list=66%, signal=250%
HOLLMANN_APOPTOSIS_VIA_CD40_UP	HOLLMANN_APOPTOSIS_VIA_CD40_UP		185	-0.134272	-2.1031	0	0.0137654	0.992	10734	tags=68%, list=55%, signal=149%
WANG_METASTASIS_OF_BREAST_CANCER_ESR1_UP	WANG_METASTASIS_OF_BREAST_CANCER_ESR1_UP		19	-0.400429	-2.09437	0.0018797	0.0144626	0.993	11750	tags=100%, list=60%, signal=250%
MSI2_BINDING_MS77	MSI2_BINDING_MS77		46	-0.264385	-2.0859	0.00376648	0.0152103	0.995	13993	tags=98%, list=71%, signal=342%
LEIN_OLIGODENDROCYTE_MARKERS	LEIN_OLIGODENDROCYTE_MARKERS		64	-0.222623	-2.08544	0.00195695	0.0152135	0.995	7895	tags=63%, list=40%, signal=104%
KRIVTSOV.LGMPVSGMP_UP	KRIVTSOV.LGMPVSGMP_UP		133	-0.154592	-2.08292	0.00573614	0.0153919	0.995	11571	tags=74%, list=59%, signal=181%
REACTOME_RNA_POL_II_PRE_TRANSCRIPTION_EVENTS	REACTOME_RNA_POL_II_PRE_TRANSCRIPTION_EVENTS		47	-0.260972	-2.08168	0.00385357	0.015474	0.995	14069	tags=98%, list=72%, signal=347%
MCBRYAN_PUBERTAL_BREAST_4_5WK_DN	MCBRYAN_PUBERTAL_BREAST_4_5WK_DN		172	-0.136216	-2.08114	0	0.0154948	0.995	12955	tags=80%, list=66%, signal=233%
REACTOME_FORMATION_OF_RNA_POL_II_ELONGATION_COMPLEX_	REACTOME_FORMATION_OF_RNA_POL_II_ELONGATION_COMPLEX_		32	-0.31012	-2.08074	0.00189753	0.015492	0.995	10461	tags=84%, list=53%, signal=181%
HOSHIDA_LIVER_CANCER_SUBCLASS_S2	HOSHIDA_LIVER_CANCER_SUBCLASS_S2		111	-0.168573	-2.07843	0	0.015668	0.995	10656	tags=71%, list=54%, signal=155%
FINETTI_BREAST_CANCER_KINOME_RED	FINETTI_BREAST_CANCER_KINOME_RED		16	-0.433031	-2.07814	0.00584795	0.0156648	0.995	8663	tags=88%, list=44%, signal=157%
REACTOME_ADAPTIVE_IMMUNE_SYSTEM	REACTOME_ADAPTIVE_IMMUNE_SYSTEM		479	-0.0829596	-2.07794	0.00389864	0.0156591	0.996	13502	tags=77%, list=69%, signal=242%
REACTOME_RNA_POL_I_RNA_POL_III_AND_MITOCHONDRIAL_TRANSCRIPTION	REACTOME_RNA_POL_I_RNA_POL_III_AND_MITOCHONDRIAL_TRANSCRIPTION		100	-0.182616	-2.07777	0.00195695	0.0156326	0.996	11522	tags=77%, list=59%, signal=186%
RIZKI_TUMOR_INVASIVENESS_3D_DN	RIZKI_TUMOR_INVASIVENESS_3D_DN		246	-0.114415	-2.07637	0	0.0157516	0.996	15063	tags=88%, list=77%, signal=377%
MARTINEZ_RESPONSE_TO_TRABECTEDIN_UP	MARTINEZ_RESPONSE_TO_TRABECTEDIN_UP		63	-0.222126	-2.07436	0	0.0159098	0.996	11518	tags=81%, list=59%, signal=196%
MEINHOLD_OVARIAN_CANCER_LOW_GRADE_DN	MEINHOLD_OVARIAN_CANCER_LOW_GRADE_DN		20	-0.386186	-2.07315	0.00427351	0.0160025	0.996	5175	tags=65%, list=26%, signal=88%
KORKOLA_YOLK_SAC_TUMOR_UP	KORKOLA_YOLK_SAC_TUMOR_UP		18	-0.399495	-2.0716	0.00199601	0.0161205	0.996	9592	tags=89%, list=49%, signal=174%
RODRIGUES_THYROID_CARCINOMA_ANAPLASTIC_DN	RODRIGUES_THYROID_CARCINOMA_ANAPLASTIC_DN		463	-0.0837643	-2.06964	0.00626305	0.0162411	0.997	16206	tags=91%, list=83%, signal=515%
SMITH_TERT_TARGETS_DN	SMITH_TERT_TARGETS_DN		79	-0.198333	-2.06596	0.00369686	0.0165398	0.998	10758	tags=75%, list=55%, signal=165%
GHO_ATF5_TARGETS_DN	GHO_ATF5_TARGETS_DN		15	-0.44166	-2.06454	0.00414079	0.0166794	0.999	7025	tags=80%, list=36%, signal=125%
SIMBULAN_PARP1_TARGETS_DN	SIMBULAN_PARP1_TARGETS_DN		17	-0.424419	-2.06378	0.00194932	0.0167284	0.999	7824	tags=82%, list=40%, signal=137%
WHITFIELD_CELL_CYCLE_G2	WHITFIELD_CELL_CYCLE_G2		165	-0.140655	-2.06124	0.00395257	0.016943	0.999	11868	tags=75%, list=61%, signal=188%
WALLACE_PROSTATE_CANCER_UP	WALLACE_PROSTATE_CANCER_UP		20	-0.380039	-2.05987	0.00584795	0.0170345	0.999	10191	tags=90%, list=52%, signal=187%
REACTOME_AUTODEGRADATION_OF_THE_E3_UBIQUITIN_LIGASE_COP1	REACTOME_AUTODEGRADATION_OF_THE_E3_UBIQUITIN_LIGASE_COP1		43	-0.265284	-2.05837	0.00811359	0.0171766	0.999	10757	tags=81%, list=55%, signal=180%
KRIVTSOV.LGMPVSGMP_DN	KRIVTSOV.LGMPVSGMP_DN		143	-0.150186	-2.05731	0.00200401	0.0172488	0.999	12693	tags=80%, list=65%, signal=225%
RIZ_ERYTHROID_DIFFERENTIATION_CCNE1	RIZ_ERYTHROID_DIFFERENTIATION_CCNE1		37	-0.287532	-2.05656	0.0040404	0.017306	0.999	10259	tags=81%, list=52%, signal=170%
GENTILE_UV_HIGH_DOSE_DN	GENTILE_UV_HIGH_DOSE_DN		288	-0.105059	-2.05255	0.00213675	0.0177408	0.999	15517	tags=90%, list=79%, signal=425%
KIM_TIAL1_TARGETS	KIM_TIAL1_TARGETS		28	-0.320861	-2.05192	0.00410678	0.0177962	0.999	10512	tags=86%, list=54%, signal=185%
SHEPARD_BMYB_MORPHOLINO_UP	SHEPARD_BMYB_MORPHOLINO_UP		190	-0.126558	-2.05154	0.00618557	0.0177835	0.999	13110	tags=79%, list=67%, signal=238%
ZHAN_MULTIPLE_MYELOMA_HP_DN	ZHAN_MULTIPLE_MYELOMA_HP_DN		41	-0.267606	-2.04831	0.00576923	0.0180827	0.999	11011	tags=83%, list=56%, signal=189%
LAIHO_COLORECTAL_CANCER_SERRATED_DN	LAIHO_COLORECTAL_CANCER_SERRATED_DN		71	-0.208748	-2.04754	0.00616016	0.0180948	0.999	13856	tags=92%, list=71%, signal=312%
PID_CMYB_PATHWAY	PID_CMYB_PATHWAY		79	-0.196418	-2.04711	0.00618557	0.018124	0.999	11539	tags=78%, list=59%, signal=190%
REACTOME_DEPOSITION_OF_NEW_CENPA_CONTAINING_NUCLEOSOMES_AT_THE_CENTROMERE	REACTOME_DEPOSITION_OF_NEW_CENPA_CONTAINING_NUCLEOSOMES_AT_THE_CENTROMERE		53	-0.240874	-2.04459	0	0.0183537	0.999	4534	tags=47%, list=23%, signal=61%
PID_ATR_PATHWAY	PID_ATR_PATHWAY		38	-0.282219	-2.04081	0.00204082	0.0187022	0.999	12522	tags=92%, list=64%, signal=255%
PUIFFE_INVASION_INHIBITED_BY_ASCITES_DN	PUIFFE_INVASION_INHIBITED_BY_ASCITES_DN		132	-0.149692	-2.04046	0.00207469	0.0187129	0.999	14447	tags=89%, list=74%, signal=336%
RUTELLA_RESPONSE_TO_HGF_DN	RUTELLA_RESPONSE_TO_HGF_DN		225	-0.116711	-2.0404	0.0106838	0.0186787	0.999	13147	tags=79%, list=67%, signal=237%
TARTE_PLASMA_CELL_VS_B_LYMPHOCYTE_UP	TARTE_PLASMA_CELL_VS_B_LYMPHOCYTE_UP		71	-0.205964	-2.03917	0.00403226	0.018779	0.999	8394	tags=63%, list=43%, signal=111%
CAIRO_HEPATOBLASTOMA_UP	CAIRO_HEPATOBLASTOMA_UP		189	-0.124753	-2.03852	0.00206186	0.0187918	0.999	13020	tags=79%, list=66%, signal=233%
PID_IL6_7_PATHWAY	PID_IL6_7_PATHWAY		45	-0.254638	-2.03733	0.00203666	0.0188986	0.999	12433	tags=89%, list=63%, signal=243%
HILLION_HMGA1B_TARGETS	HILLION_HMGA1B_TARGETS		82	-0.189315	-2.03665	0.00411523	0.0189305	0.999	10877	tags=74%, list=56%, signal=167%
FURUKAWA_DUSP6_TARGETS_PCI35_DN	FURUKAWA_DUSP6_TARGETS_PCI35_DN		68	-0.209903	-2.03575	0.00198413	0.0190044	0.999	10592	tags=75%, list=54%, signal=163%
REACTOME_ACTIVATION_OF_NF_KAPPAB_IN_B_CELLS	REACTOME_ACTIVATION_OF_NF_KAPPAB_IN_B_CELLS		58	-0.224243	-2.02963	0.008	0.0196376	1	11154	tags=79%, list=57%, signal=184%
WANG_CISPLATIN_RESPONSE_AND_XPC_UP	WANG_CISPLATIN_RESPONSE_AND_XPC_UP		180	-0.131763	-2.02949	0.00793651	0.0196068	1	9303	tags=61%, list=48%, signal=114%
PIONTEK_PKD1_TARGETS_DN	PIONTEK_PKD1_TARGETS_DN		17	-0.403157	-2.02749	0	0.0198038	1	8240	tags=82%, list=42%, signal=142%
LINDGREN_BLADDER_CANCER_CLUSTER_1_DN	LINDGREN_BLADDER_CANCER_CLUSTER_1_DN		343	-0.0945553	-2.02355	0.00201613	0.0202388	1	10571	tags=63%, list=54%, signal=135%
XU_HGF_SIGNALING_NOT_VIA_AKT1_48HR_DN	XU_HGF_SIGNALING_NOT_VIA_AKT1_48HR_DN		19	-0.37954	-2.02343	0.00388349	0.0202094	1	11128	tags=95%, list=57%, signal=219%
KEGG_RNA_DEGRADATION	KEGG_RNA_DEGRADATION		51	-0.243091	-2.0211	0.00392927	0.0204425	1	13684	tags=94%, list=70%, signal=312%
JIANG_HYPOXIA_VIA_VHL	JIANG_HYPOXIA_VIA_VHL		33	-0.29623	-2.01942	0.00201613	0.0206256	1	11419	tags=88%, list=58%, signal=210%
YAGI_AML_RELAPSE_PROGNOSIS	YAGI_AML_RELAPSE_PROGNOSIS		31	-0.299766	-2.01434	0	0.021205	1	9301	tags=77%, list=47%, signal=147%
KIM_LRRC3B_TARGETS	KIM_LRRC3B_TARGETS		27	-0.325267	-2.01401	0.00197239	0.0211979	1	8146	tags=74%, list=42%, signal=127%
MEISSNER_NPC_HCP_WITH_H3K4ME2_AND_H3K27ME3	MEISSNER_NPC_HCP_WITH_H3K4ME2_AND_H3K27ME3		303	-0.0980107	-2.01364	0.002079	0.0212054	1	2894	tags=24%, list=15%, signal=28%
WANG_CLIM2_TARGETS_UP	WANG_CLIM2_TARGETS_UP		218	-0.118463	-2.00984	0.00378072	0.0216559	1	11451	tags=70%, list=58%, signal=167%
WANG.LGMPHOXA9-MEIS1VSHSC_UP	WANG.LGMPHOXA9-MEIS1VSHSC_UP		180	-0.130006	-2.00892	0.00787402	0.0217225	1	10969	tags=69%, list=56%, signal=155%
REACTOME_RNA_POL_I_TRANSCRIPTION	REACTOME_RNA_POL_I_TRANSCRIPTION		68	-0.212632	-2.0088	0.00205339	0.0217	1	5355	tags=49%, list=27%, signal=67%
REACTOME_CLEAVAGE_OF_GROWING_TRANSCRIPT_IN_THE_TERMINATION_REGION_	REACTOME_CLEAVAGE_OF_GROWING_TRANSCRIPT_IN_THE_TERMINATION_REGION_		41	-0.264913	-2.00659	0.00399202	0.0219715	1	10586	tags=80%, list=54%, signal=175%
JOHNSTONE_PARVB_TARGETS_3_UP	JOHNSTONE_PARVB_TARGETS_3_UP		383	-0.0907422	-2.00639	0.00437637	0.0219513	1	13240	tags=77%, list=68%, signal=232%
REACTOME_EXTENSION_OF_TELOMERES	REACTOME_EXTENSION_OF_TELOMERES		26	-0.323805	-2.00596	0.00194932	0.0219692	1	7979	tags=73%, list=41%, signal=123%
FAELT_B_CLL_WITH_VH3_21_DN	FAELT_B_CLL_WITH_VH3_21_DN		47	-0.246847	-2.00171	0.00604839	0.0225075	1	10595	tags=79%, list=54%, signal=171%
JISON_SICKLE_CELL_DISEASE_DN	JISON_SICKLE_CELL_DISEASE_DN		161	-0.135437	-2.00124	0.00572519	0.0225287	1	12818	tags=79%, list=65%, signal=226%
RAGHAVACHARI_PLATELET_SPECIFIC_GENES	RAGHAVACHARI_PLATELET_SPECIFIC_GENES		60	-0.221393	-1.99487	0.00587084	0.0233676	1	10366	tags=75%, list=53%, signal=159%
JIANG_AGING_CEREBRAL_CORTEX_UP	JIANG_AGING_CEREBRAL_CORTEX_UP		33	-0.295778	-1.99262	0.00616016	0.023654	1	10241	tags=82%, list=52%, signal=171%
REACTOME_ABORTIVE_ELONGATION_OF_HIV1_TRANSCRIPT_IN_THE_ABSENCE_OF_TAT	REACTOME_ABORTIVE_ELONGATION_OF_HIV1_TRANSCRIPT_IN_THE_ABSENCE_OF_TAT		17	-0.407393	-1.99232	0.00750469	0.0236635	1	10461	tags=94%, list=53%, signal=202%
WALLACE_JAK2_TARGETS_UP	WALLACE_JAK2_TARGETS_UP		22	-0.342944	-1.99203	0.00733945	0.023652	1	8425	tags=77%, list=43%, signal=135%
KYNG_WERNER_SYNDROM_AND_NORMAL_AGING_DN	KYNG_WERNER_SYNDROM_AND_NORMAL_AGING_DN		204	-0.121166	-1.99029	0.00793651	0.0238376	1	15796	tags=93%, list=81%, signal=474%
LI_WILMS_TUMOR_ANAPLASTIC_UP	LI_WILMS_TUMOR_ANAPLASTIC_UP		18	-0.387188	-1.98272	0.00206612	0.0248278	1	5481	tags=67%, list=28%, signal=92%
BAKKER_FOXO3_TARGETS_DN	BAKKER_FOXO3_TARGETS_DN		153	-0.136702	-1.98259	0.00790514	0.0248116	1	14752	tags=89%, list=75%, signal=358%
REACTOME_PREFOLDIN_MEDIATED_TRANSFER_OF_SUBSTRATE_TO_CCT_TRIC	REACTOME_PREFOLDIN_MEDIATED_TRANSFER_OF_SUBSTRATE_TO_CCT_TRIC		26	-0.326289	-1.98088	0.00616016	0.0250195	1	10190	tags=85%, list=52%, signal=176%
ZWANG_EGF_PERSISTENTLY_DN	ZWANG_EGF_PERSISTENTLY_DN		50	-0.234174	-1.98071	0.00582524	0.0250008	1	7960	tags=64%, list=41%, signal=108%
ZUCCHI_METASTASIS_DN	ZUCCHI_METASTASIS_DN		39	-0.263365	-1.97974	0.00622407	0.025075	1	7407	tags=64%, list=38%, signal=103%
TIEN_INTESTINE_PROBIOTICS_24HR_DN	TIEN_INTESTINE_PROBIOTICS_24HR_DN		203	-0.118757	-1.97621	0.00589391	0.0255369	1	11205	tags=69%, list=57%, signal=160%
KEGG_AMINOACYL_TRNA_BIOSYNTHESIS	KEGG_AMINOACYL_TRNA_BIOSYNTHESIS		40	-0.268418	-1.97423	0	0.0258296	1	12380	tags=90%, list=63%, signal=244%
REACTOME_MRNA_CAPPING	REACTOME_MRNA_CAPPING		26	-0.319242	-1.97035	0.00207469	0.0264369	1	11081	tags=88%, list=57%, signal=203%
GROSS_HYPOXIA_VIA_ELK3_AND_HIF1A_DN	GROSS_HYPOXIA_VIA_ELK3_AND_HIF1A_DN		94	-0.172617	-1.96993	0.010395	0.0264615	1	8720	tags=62%, list=45%, signal=111%
SENGUPTA_NASOPHARYNGEAL_CARCINOMA_UP	SENGUPTA_NASOPHARYNGEAL_CARCINOMA_UP		264	-0.106368	-1.9688	0.00596422	0.0266015	1	13746	tags=81%, list=70%, signal=267%
BOYAULT_LIVER_CANCER_SUBCLASS_G23_UP	BOYAULT_LIVER_CANCER_SUBCLASS_G23_UP		48	-0.246549	-1.968	0.003861	0.0266855	1	8240	tags=67%, list=42%, signal=115%
HONMA_DOCETAXEL_RESISTANCE	HONMA_DOCETAXEL_RESISTANCE		29	-0.300365	-1.96654	0.010352	0.0268455	1	9659	tags=79%, list=49%, signal=156%
CHEN_HOXA5_TARGETS_9HR_DN	CHEN_HOXA5_TARGETS_9HR_DN		34	-0.278087	-1.96489	0.0019305	0.0270547	1	7812	tags=68%, list=40%, signal=112%
SWEET_KRAS_ONCOGENIC_SIGNATURE	SWEET_KRAS_ONCOGENIC_SIGNATURE		84	-0.180437	-1.96397	0.00200401	0.0271696	1	9538	tags=67%, list=49%, signal=129%
REACTOME_DIABETES_PATHWAYS	REACTOME_DIABETES_PATHWAYS		111	-0.155469	-1.96314	0.0101215	0.0272568	1	11264	tags=73%, list=58%, signal=171%
FARMER_BREAST_CANCER_BASAL_VS_LULMINAL	FARMER_BREAST_CANCER_BASAL_VS_LULMINAL		301	-0.0939068	-1.96266	0.00610998	0.0272911	1	14195	tags=82%, list=72%, signal=292%
ZHENG_GLIOBLASTOMA_PLASTICITY_UP	ZHENG_GLIOBLASTOMA_PLASTICITY_UP		227	-0.111338	-1.96061	0.00203666	0.0275323	1	8457	tags=54%, list=43%, signal=94%
PEDERSEN_METASTASIS_BY_ERBB2_ISOFORM_7	PEDERSEN_METASTASIS_BY_ERBB2_ISOFORM_7		348	-0.0922131	-1.96006	0.00393701	0.0275658	1	15897	tags=90%, list=81%, signal=471%
GRADE_COLON_AND_RECTAL_CANCER_DN	GRADE_COLON_AND_RECTAL_CANCER_DN		92	-0.17682	-1.95772	0.0100806	0.027898	1	12519	tags=82%, list=64%, signal=225%
REACTOME_INTERACTIONS_OF_VPR_WITH_HOST_CELLULAR_PROTEINS	REACTOME_INTERACTIONS_OF_VPR_WITH_HOST_CELLULAR_PROTEINS		31	-0.296996	-1.95677	0.00636943	0.027987	1	11882	tags=90%, list=61%, signal=229%
DACOSTA_UV_RESPONSE_VIA_ERCC3_TTD_UP	DACOSTA_UV_RESPONSE_VIA_ERCC3_TTD_UP		54	-0.226435	-1.95662	0.00606061	0.0279633	1	14074	tags=94%, list=72%, signal=335%
GROSS_HYPOXIA_VIA_HIF1A_UP	GROSS_HYPOXIA_VIA_HIF1A_UP		72	-0.197383	-1.95649	0	0.0279259	1	13013	tags=86%, list=66%, signal=256%
TONKS_TARGETS_OF_RUNX1_RUNX1T1_FUSION_MONOCYTE_UP	TONKS_TARGETS_OF_RUNX1_RUNX1T1_FUSION_MONOCYTE_UP		183	-0.124301	-1.95272	0.00806452	0.0284858	1	11608	tags=72%, list=59%, signal=174%
CHICAS_RB1_TARGETS_LOW_SERUM	CHICAS_RB1_TARGETS_LOW_SERUM		77	-0.191368	-1.95122	0.00578035	0.0286605	1	11019	tags=75%, list=56%, signal=172%
PENG_RAPAMYCIN_RESPONSE_UP	PENG_RAPAMYCIN_RESPONSE_UP		177	-0.125351	-1.94987	0.00392157	0.0288616	1	8411	tags=55%, list=43%, signal=96%
RICKMAN_METASTASIS_UP	RICKMAN_METASTASIS_UP		307	-0.0962061	-1.94913	0.00606061	0.0288969	1	15178	tags=87%, list=78%, signal=381%
KYNG_RESPONSE_TO_H2O2_VIA_ERCC6_DN	KYNG_RESPONSE_TO_H2O2_VIA_ERCC6_DN		42	-0.251357	-1.94672	0.00198413	0.0292661	1	5347	tags=52%, list=27%, signal=72%
THUM_SYSTOLIC_HEART_FAILURE_UP	THUM_SYSTOLIC_HEART_FAILURE_UP		366	-0.0858331	-1.94508	0.00788955	0.0294694	1	12584	tags=73%, list=64%, signal=200%
MOREIRA_RESPONSE_TO_TSA_UP	MOREIRA_RESPONSE_TO_TSA_UP		25	-0.318137	-1.94385	0.00389105	0.0296389	1	6312	tags=64%, list=32%, signal=94%
CHIARADONNA_NEOPLASTIC_TRANSFORMATION_KRAS_UP	CHIARADONNA_NEOPLASTIC_TRANSFORMATION_KRAS_UP		116	-0.157076	-1.94155	0.00410678	0.0299903	1	11124	tags=72%, list=57%, signal=167%
DEURIG_T_CELL_PROLYMPHOCYTIC_LEUKEMIA_UP	DEURIG_T_CELL_PROLYMPHOCYTIC_LEUKEMIA_UP		323	-0.0930535	-1.94084	0	0.0300605	1	10577	tags=63%, list=54%, signal=135%
MULLIGAN_NTF3_SIGNALING_VIA_INSR_AND_IGF1R_UP	MULLIGAN_NTF3_SIGNALING_VIA_INSR_AND_IGF1R_UP		21	-0.3541	-1.9395	0.00632911	0.0302584	1	8927	tags=81%, list=46%, signal=149%
ZHOU_INFLAMMATORY_RESPONSE_LIVE_DN	ZHOU_INFLAMMATORY_RESPONSE_LIVE_DN		321	-0.0930235	-1.93824	0.00200803	0.0304309	1	16023	tags=91%, list=82%, signal=492%
PASQUALUCCI_LYMPHOMA_BY_GC_STAGE_DN	PASQUALUCCI_LYMPHOMA_BY_GC_STAGE_DN		149	-0.137828	-1.9382	0.00608519	0.0303789	1	13094	tags=81%, list=67%, signal=241%
REACTOME_TRANSPORT_OF_MATURE_TRANSCRIPT_TO_CYTOPLASM	REACTOME_TRANSPORT_OF_MATURE_TRANSCRIPT_TO_CYTOPLASM		50	-0.233898	-1.93796	0.00974659	0.0303643	1	11882	tags=84%, list=61%, signal=213%
LY_AGING_PREMATURE_DN	LY_AGING_PREMATURE_DN		29	-0.299783	-1.9371	0.00931099	0.030468	1	6294	tags=62%, list=32%, signal=91%
FULCHER_INFLAMMATORY_RESPONSE_LECTIN_VS_LPS_UP	FULCHER_INFLAMMATORY_RESPONSE_LECTIN_VS_LPS_UP		500	-0.076801	-1.93704	0.00968992	0.0304184	1	12596	tags=72%, list=64%, signal=196%
RIZ_ERYTHROID_DIFFERENTIATION_HEMGN	RIZ_ERYTHROID_DIFFERENTIATION_HEMGN		27	-0.308398	-1.93411	0.00790514	0.0308265	1	6300	tags=63%, list=32%, signal=93%
REACTOME_TRANSCRIPTION_COUPLED_NER_TC_NER	REACTOME_TRANSCRIPTION_COUPLED_NER_TC_NER		40	-0.253798	-1.92994	0.00813008	0.0315173	1	11197	tags=83%, list=57%, signal=192%
PARK_HSC_AND_MULTIPOTENT_PROGENITORS	PARK_HSC_AND_MULTIPOTENT_PROGENITORS		47	-0.237597	-1.92988	0.00595238	0.0314704	1	12859	tags=89%, list=66%, signal=260%
PURBEY_TARGETS_OF_CTBP1_AND_SATB1_DN	PURBEY_TARGETS_OF_CTBP1_AND_SATB1_DN		164	-0.128133	-1.92429	0.0121212	0.0324375	1	11603	tags=72%, list=59%, signal=175%
GALE_APL_WITH_FLT3_MUTATED_DN	GALE_APL_WITH_FLT3_MUTATED_DN		16	-0.396902	-1.92309	0.00622407	0.0325998	1	8146	tags=81%, list=42%, signal=139%
DMAP_NEUT.VS.HSC_UP	DMAP_NEUT.VS.HSC_UP		225	-0.110783	-1.91853	0	0.0334836	1	13871	tags=82%, list=71%, signal=277%
HOLLEMAN_ASPARAGINASE_RESISTANCE_ALL_DN	HOLLEMAN_ASPARAGINASE_RESISTANCE_ALL_DN		22	-0.337845	-1.9183	0.00806452	0.0334639	1	10305	tags=86%, list=53%, signal=182%
GRUETZMANN_PANCREATIC_CANCER_DN	GRUETZMANN_PANCREATIC_CANCER_DN		190	-0.118733	-1.91661	0.0149573	0.0336965	1	9139	tags=58%, list=47%, signal=108%
KEGG_FATTY_ACID_METABOLISM	KEGG_FATTY_ACID_METABOLISM		37	-0.266704	-1.91649	0.00397614	0.0336546	1	14371	tags=100%, list=73%, signal=375%
LINDGREN_BLADDER_CANCER_CLUSTER_3_DN	LINDGREN_BLADDER_CANCER_CLUSTER_3_DN		203	-0.115554	-1.91247	0.00417537	0.03441	1	14547	tags=86%, list=74%, signal=330%
KEGG_CYSTEINE_AND_METHIONINE_METABOLISM	KEGG_CYSTEINE_AND_METHIONINE_METABOLISM		30	-0.2977	-1.91225	0.00813008	0.0343972	1	11152	tags=87%, list=57%, signal=201%
LANDIS_ERBB2_BREAST_PRENEOPLASTIC_DN	LANDIS_ERBB2_BREAST_PRENEOPLASTIC_DN		51	-0.225229	-1.91176	0.00606061	0.0344361	1	11729	tags=82%, list=60%, signal=205%
PELLICCIOTTA_HDAC_IN_ANTIGEN_PRESENTATION_DN	PELLICCIOTTA_HDAC_IN_ANTIGEN_PRESENTATION_DN		45	-0.236329	-1.91139	0.00411523	0.0344364	1	11050	tags=80%, list=56%, signal=183%
CAFFAREL_RESPONSE_TO_THC_24HR_5_DN	CAFFAREL_RESPONSE_TO_THC_24HR_5_DN		53	-0.221561	-1.9112	0.00578035	0.0344131	1	11562	tags=81%, list=59%, signal=198%
SEIDEN_ONCOGENESIS_BY_MET	SEIDEN_ONCOGENESIS_BY_MET		82	-0.178374	-1.91053	0.0105485	0.0344689	1	14195	tags=90%, list=72%, signal=327%
ZHAN_MULTIPLE_MYELOMA_DN	ZHAN_MULTIPLE_MYELOMA_DN		38	-0.261798	-1.90989	0.00994036	0.0345429	1	5191	tags=53%, list=27%, signal=71%
ZHAN_MULTIPLE_MYELOMA_SUBGROUPS	ZHAN_MULTIPLE_MYELOMA_SUBGROUPS		29	-0.302471	-1.90965	0.00420168	0.0345237	1	7592	tags=69%, list=39%, signal=112%
REACTOME_RECRUITMENT_OF_MITOTIC_CENTROSOME_PROTEINS_AND_COMPLEXES	REACTOME_RECRUITMENT_OF_MITOTIC_CENTROSOME_PROTEINS_AND_COMPLEXES		61	-0.209543	-1.90925	0.00614754	0.0345406	1	12604	tags=85%, list=64%, signal=238%
TORCHIA_TARGETS_OF_EWSR1_FLI1_FUSION_DN	TORCHIA_TARGETS_OF_EWSR1_FLI1_FUSION_DN		277	-0.100043	-1.90911	0.0191083	0.0345004	1	14754	tags=85%, list=75%, signal=341%
REACTOME_FORMATION_OF_THE_HIV1_EARLY_ELONGATION_COMPLEX	REACTOME_FORMATION_OF_THE_HIV1_EARLY_ELONGATION_COMPLEX		25	-0.314605	-1.90883	0.0039604	0.0344815	1	11081	tags=88%, list=57%, signal=202%
UDAYAKUMAR_MED1_TARGETS_UP	UDAYAKUMAR_MED1_TARGETS_UP		121	-0.149897	-1.90855	0.011976	0.034492	1	13268	tags=83%, list=68%, signal=255%
ZHENG_FOXP3_TARGETS_IN_THYMUS_UP	ZHENG_FOXP3_TARGETS_IN_THYMUS_UP		178	-0.124443	-1.9085	0.00831601	0.0344435	1	15959	tags=94%, list=81%, signal=502%
BILD_E2F3_ONCOGENIC_SIGNATURE	BILD_E2F3_ONCOGENIC_SIGNATURE		214	-0.112662	-1.90798	0.00609756	0.0344607	1	9166	tags=58%, list=47%, signal=108%
JIANG_AGING_HYPOTHALAMUS_UP	JIANG_AGING_HYPOTHALAMUS_UP		42	-0.249982	-1.90658	0.012605	0.0346822	1	10969	tags=81%, list=56%, signal=184%
BIDUS_METASTASIS_DN	BIDUS_METASTASIS_DN		141	-0.139642	-1.90516	0.0141988	0.034937	1	14508	tags=88%, list=74%, signal=337%
GOTZMANN_EPITHELIAL_TO_MESENCHYMAL_TRANSITION_DN	GOTZMANN_EPITHELIAL_TO_MESENCHYMAL_TRANSITION_DN		191	-0.120946	-1.90397	0.00598802	0.0351093	1	11497	tags=71%, list=59%, signal=170%
LIU_CMYB_TARGETS_UP	LIU_CMYB_TARGETS_UP		143	-0.13614	-1.90329	0.0136719	0.0351871	1	13103	tags=80%, list=67%, signal=241%
REACTOME_RNA_POL_I_PROMOTER_OPENING	REACTOME_RNA_POL_I_PROMOTER_OPENING		48	-0.234224	-1.9023	0.0114723	0.0353172	1	3993	tags=44%, list=20%, signal=55%
WONG_PROTEASOME_GENE_MODULE	WONG_PROTEASOME_GENE_MODULE		49	-0.232827	-1.89993	0.00976562	0.0357249	1	13837	tags=94%, list=71%, signal=319%
RAHMAN_TP53_TARGETS_PHOSPHORYLATED	RAHMAN_TP53_TARGETS_PHOSPHORYLATED		19	-0.363643	-1.89909	0.00607288	0.0358384	1	11439	tags=95%, list=58%, signal=228%
HU_GENOTOXIC_DAMAGE_24HR	HU_GENOTOXIC_DAMAGE_24HR		32	-0.281129	-1.89513	0.00842105	0.0366462	1	7356	tags=66%, list=38%, signal=105%
LAMB_CCND1_TARGETS	LAMB_CCND1_TARGETS		18	-0.379149	-1.89464	0.0116505	0.0366877	1	11078	tags=94%, list=57%, signal=217%
PARK_TRETINOIN_RESPONSE_AND_RARA_PLZF_FUSION	PARK_TRETINOIN_RESPONSE_AND_RARA_PLZF_FUSION		21	-0.33677	-1.89248	0.0117417	0.0371143	1	9266	tags=81%, list=47%, signal=153%
PARK_HSC_VS_MULTIPOTENT_PROGENITORS_DN	PARK_HSC_VS_MULTIPOTENT_PROGENITORS_DN		18	-0.371741	-1.89158	0.0210325	0.0372314	1	10135	tags=89%, list=52%, signal=184%
CHIBA_RESPONSE_TO_TSA_UP	CHIBA_RESPONSE_TO_TSA_UP		47	-0.232725	-1.89122	0.00616016	0.0372742	1	4621	tags=47%, list=24%, signal=61%
KEGG_NUCLEOTIDE_EXCISION_REPAIR	KEGG_NUCLEOTIDE_EXCISION_REPAIR		40	-0.253798	-1.89103	0.00824742	0.0372693	1	11197	tags=83%, list=57%, signal=192%
ZHAN_V2_LATE_DIFFERENTIATION_GENES	ZHAN_V2_LATE_DIFFERENTIATION_GENES		42	-0.245406	-1.88942	0.00598802	0.0375223	1	13856	tags=95%, list=71%, signal=325%
DAZARD_RESPONSE_TO_UV_SCC_UP	DAZARD_RESPONSE_TO_UV_SCC_UP		106	-0.155856	-1.88853	0.00406504	0.0376317	1	12484	tags=79%, list=64%, signal=217%
WATANABE_RECTAL_CANCER_RADIOTHERAPY_RESPONSIVE_UP	WATANABE_RECTAL_CANCER_RADIOTHERAPY_RESPONSIVE_UP		98	-0.166808	-1.88832	0.00770713	0.0376161	1	13736	tags=87%, list=70%, signal=289%
REACTOME_NEP_NS2_INTERACTS_WITH_THE_CELLULAR_EXPORT_MACHINERY	REACTOME_NEP_NS2_INTERACTS_WITH_THE_CELLULAR_EXPORT_MACHINERY		26	-0.316798	-1.88806	0.00773694	0.0376065	1	11882	tags=92%, list=61%, signal=234%
KOYAMA_SEMA3B_TARGETS_DN	KOYAMA_SEMA3B_TARGETS_DN		352	-0.0873894	-1.88657	0.00808081	0.0378488	1	13564	tags=78%, list=69%, signal=249%
ACEVEDO_NORMAL_TISSUE_ADJACENT_TO_LIVER_TUMOR_UP	ACEVEDO_NORMAL_TISSUE_ADJACENT_TO_LIVER_TUMOR_UP		148	-0.133101	-1.88655	0	0.0377882	1	15674	tags=93%, list=80%, signal=464%
CHUNG_BLISTER_CYTOTOXICITY_UP	CHUNG_BLISTER_CYTOTOXICITY_UP		114	-0.152648	-1.88632	0.0121704	0.0377847	1	10428	tags=68%, list=53%, signal=146%
XU_RESPONSE_TO_TRETINOIN_AND_NSC682994_DN	XU_RESPONSE_TO_TRETINOIN_AND_NSC682994_DN		15	-0.396232	-1.88609	0.00612245	0.0377649	1	10525	tags=93%, list=54%, signal=202%
NIKOLSKY_BREAST_CANCER_16P13_AMPLICON	NIKOLSKY_BREAST_CANCER_16P13_AMPLICON		81	-0.18029	-1.88475	0.00608519	0.0379937	1	4705	tags=42%, list=24%, signal=55%
HEDENFALK_BREAST_CANCER_HEREDITARY_VS_SPORADIC	HEDENFALK_BREAST_CANCER_HEREDITARY_VS_SPORADIC		47	-0.233194	-1.88452	0.0117647	0.0379856	1	14195	tags=96%, list=72%, signal=347%
REACTOME_APOPTOSIS	REACTOME_APOPTOSIS		133	-0.137221	-1.88408	0.00395257	0.038022	1	13823	tags=84%, list=71%, signal=284%
CHEOK_RESPONSE_TO_HD_MTX_DN	CHEOK_RESPONSE_TO_HD_MTX_DN		24	-0.309531	-1.88157	0.0168539	0.0385235	1	11082	tags=88%, list=57%, signal=201%
SAKAI_CHRONIC_HEPATITIS_VS_LIVER_CANCER_UP	SAKAI_CHRONIC_HEPATITIS_VS_LIVER_CANCER_UP		76	-0.176993	-1.87952	0.00613497	0.038934	1	12524	tags=82%, list=64%, signal=225%
REACTOME_CLASS_I_MHC_MEDIATED_ANTIGEN_PROCESSING_PRESENTATION	REACTOME_CLASS_I_MHC_MEDIATED_ANTIGEN_PROCESSING_PRESENTATION		217	-0.110653	-1.87906	0.0135922	0.038965	1	11124	tags=68%, list=57%, signal=155%
AMUNDSON_POOR_SURVIVAL_AFTER_GAMMA_RADIATION_2G	AMUNDSON_POOR_SURVIVAL_AFTER_GAMMA_RADIATION_2G		160	-0.126104	-1.87826	0.0164609	0.0390713	1	11015	tags=69%, list=56%, signal=156%
ZHANG_TLX_TARGETS_36HR_UP	ZHANG_TLX_TARGETS_36HR_UP		205	-0.11145	-1.8758	0.0039604	0.0395282	1	5579	tags=40%, list=28%, signal=55%
RICKMAN_HEAD_AND_NECK_CANCER_C	RICKMAN_HEAD_AND_NECK_CANCER_C		87	-0.172895	-1.87549	0.0221328	0.0395318	1	3383	tags=34%, list=17%, signal=41%
JAZAERI_BREAST_CANCER_BRCA1_VS_BRCA2_UP	JAZAERI_BREAST_CANCER_BRCA1_VS_BRCA2_UP		46	-0.232255	-1.87352	0.0122699	0.0399364	1	14195	tags=96%, list=72%, signal=347%
MENSSEN_MYC_TARGETS	MENSSEN_MYC_TARGETS		48	-0.231647	-1.87261	0.0104384	0.040064	1	10571	tags=77%, list=54%, signal=167%
HOLLEMAN_PREDNISOLONE_RESISTANCE_ALL_UP	HOLLEMAN_PREDNISOLONE_RESISTANCE_ALL_UP		17	-0.37576	-1.86739	0.00618557	0.0411055	1	9928	tags=88%, list=51%, signal=179%
HU_GENOTOXIC_DAMAGE_4HR	HU_GENOTOXIC_DAMAGE_4HR		34	-0.266872	-1.86693	0.00392927	0.0411455	1	12639	tags=91%, list=65%, signal=257%
KUMAR_AUTOPHAGY_NETWORK	KUMAR_AUTOPHAGY_NETWORK		63	-0.203503	-1.8669	0.0200401	0.0410811	1	10949	tags=76%, list=56%, signal=172%
VIETOR_IFRD1_TARGETS	VIETOR_IFRD1_TARGETS		20	-0.341714	-1.8656	0.00557621	0.0413347	1	6045	tags=65%, list=31%, signal=94%
VANTVEER_BREAST_CANCER_METASTASIS_DN	VANTVEER_BREAST_CANCER_METASTASIS_DN		106	-0.152845	-1.86229	0.00980392	0.0420532	1	8663	tags=59%, list=44%, signal=106%
ZHOU_TNF_SIGNALING_30MIN	ZHOU_TNF_SIGNALING_30MIN		50	-0.220554	-1.86072	0.00803213	0.0423568	1	10576	tags=76%, list=54%, signal=165%
HAHTOLA_MYCOSIS_FUNGOIDES_SKIN_DN	HAHTOLA_MYCOSIS_FUNGOIDES_SKIN_DN		26	-0.305112	-1.8606	0.011811	0.0423103	1	6085	tags=62%, list=31%, signal=89%
REACTOME_MHC_CLASS_II_ANTIGEN_PRESENTATION	REACTOME_MHC_CLASS_II_ANTIGEN_PRESENTATION		85	-0.176036	-1.85917	0.00992064	0.0426029	1	13387	tags=86%, list=68%, signal=270%
ELVIDGE_HIF1A_AND_HIF2A_TARGETS_UP	ELVIDGE_HIF1A_AND_HIF2A_TARGETS_UP		38	-0.260014	-1.85901	0.00809717	0.0425719	1	12956	tags=92%, list=66%, signal=272%
DIRMEIER_LMP1_RESPONSE_LATE_DN	DIRMEIER_LMP1_RESPONSE_LATE_DN		28	-0.290927	-1.85827	0.0177515	0.0426777	1	6901	tags=64%, list=35%, signal=99%
WHITFIELD_CELL_CYCLE_M_G1	WHITFIELD_CELL_CYCLE_M_G1		134	-0.136872	-1.85814	0.00996016	0.0426407	1	12830	tags=79%, list=66%, signal=228%
MORI_SMALL_PRE_BII_LYMPHOCYTE_DN	MORI_SMALL_PRE_BII_LYMPHOCYTE_DN		72	-0.186465	-1.85771	0.00590551	0.0426509	1	13770	tags=89%, list=70%, signal=298%
WANG_TARGETS_OF_MLL_CBP_FUSION_DN	WANG_TARGETS_OF_MLL_CBP_FUSION_DN		40	-0.252862	-1.85685	0.0148305	0.0428125	1	9257	tags=73%, list=47%, signal=137%
LEE_LIVER_CANCER_MYC_UP	LEE_LIVER_CANCER_MYC_UP		50	-0.219396	-1.85677	0.01002	0.0427774	1	7857	tags=62%, list=40%, signal=103%
FLECHNER_PBL_KIDNEY_TRANSPLANT_REJECTED_VS_OK_UP	FLECHNER_PBL_KIDNEY_TRANSPLANT_REJECTED_VS_OK_UP		61	-0.198623	-1.85669	0.0145228	0.0427367	1	10891	tags=75%, list=56%, signal=169%
GOLUB_ALL_VS_AML_DN	GOLUB_ALL_VS_AML_DN		20	-0.343613	-1.85436	0.00592885	0.0432793	1	6987	tags=70%, list=36%, signal=109%
SHAFFER_IRF4_TARGETS_IN_ACTIVATED_B_LYMPHOCYTE	SHAFFER_IRF4_TARGETS_IN_ACTIVATED_B_LYMPHOCYTE		73	-0.183064	-1.85388	0.0102249	0.0432976	1	11452	tags=77%, list=58%, signal=184%
REACTOME_G1_S_SPECIFIC_TRANSCRIPTION	REACTOME_G1_S_SPECIFIC_TRANSCRIPTION		17	-0.369173	-1.85329	0.012474	0.043364	1	7753	tags=76%, list=40%, signal=126%
ELLWOOD_MYC_TARGETS_DN	ELLWOOD_MYC_TARGETS_DN		35	-0.268055	-1.85278	0.0137255	0.043461	1	12106	tags=89%, list=62%, signal=232%
LIU_VAV3_PROSTATE_CARCINOGENESIS_UP	LIU_VAV3_PROSTATE_CARCINOGENESIS_UP		78	-0.179553	-1.85174	0.012	0.0436519	1	5035	tags=44%, list=26%, signal=58%
YAO_TEMPORAL_RESPONSE_TO_PROGESTERONE_CLUSTER_7	YAO_TEMPORAL_RESPONSE_TO_PROGESTERONE_CLUSTER_7		67	-0.19191	-1.85153	0.013834	0.0436352	1	12039	tags=81%, list=61%, signal=209%
KIM_WT1_TARGETS_12HR_DN	KIM_WT1_TARGETS_12HR_DN		190	-0.11394	-1.85106	0.0156863	0.0436643	1	12324	tags=74%, list=63%, signal=198%
RIZ_ERYTHROID_DIFFERENTIATION_HBZ	RIZ_ERYTHROID_DIFFERENTIATION_HBZ		37	-0.254836	-1.85016	0.00757576	0.0438228	1	8781	tags=70%, list=45%, signal=127%
BILD_MYC_ONCOGENIC_SIGNATURE	BILD_MYC_ONCOGENIC_SIGNATURE		178	-0.119355	-1.84923	0.00632911	0.0439705	1	11327	tags=70%, list=58%, signal=164%
FERRANDO_HOX11_NEIGHBORS	FERRANDO_HOX11_NEIGHBORS		21	-0.333319	-1.84899	0.014862	0.0439477	1	8401	tags=76%, list=43%, signal=133%
REACTOME_BETA_DEFENSINS	REACTOME_BETA_DEFENSINS		20	-0.344919	-1.848	0.00821355	0.0440868	1	4024	tags=55%, list=21%, signal=69%
HAMAI_APOPTOSIS_VIA_TRAIL_DN	HAMAI_APOPTOSIS_VIA_TRAIL_DN		156	-0.124861	-1.84589	0.0136986	0.0445424	1	4103	tags=33%, list=21%, signal=42%
REACTOME_MEIOSIS	REACTOME_MEIOSIS		95	-0.161036	-1.84566	0.00803213	0.0445322	1	12323	tags=79%, list=63%, signal=212%
REACTOME_REGULATION_OF_GLUCOKINASE_BY_GLUCOKINASE_REGULATORY_PROTEIN	REACTOME_REGULATION_OF_GLUCOKINASE_BY_GLUCOKINASE_REGULATORY_PROTEIN		26	-0.316798	-1.84439	0.00992064	0.0447647	1	11882	tags=92%, list=61%, signal=234%
KAYO_AGING_MUSCLE_DN	KAYO_AGING_MUSCLE_DN		111	-0.147847	-1.84395	0.0119522	0.0447903	1	11236	tags=72%, list=57%, signal=168%
REACTOME_ACTIVATION_OF_ATR_IN_RESPONSE_TO_REPLICATION_STRESS	REACTOME_ACTIVATION_OF_ATR_IN_RESPONSE_TO_REPLICATION_STRESS		34	-0.268917	-1.84355	0.0103734	0.0448212	1	13175	tags=94%, list=67%, signal=287%
BOUDOUKHA_BOUND_BY_IGF2BP2	BOUDOUKHA_BOUND_BY_IGF2BP2		97	-0.155996	-1.84328	0.0186722	0.0448026	1	9882	tags=66%, list=50%, signal=133%
REACTOME_RNA_POL_II_TRANSCRIPTION_PRE_INITIATION_AND_PROMOTER_OPENING	REACTOME_RNA_POL_II_TRANSCRIPTION_PRE_INITIATION_AND_PROMOTER_OPENING		36	-0.254312	-1.83901	0.00790514	0.0457484	1	14069	tags=97%, list=72%, signal=345%
XU_CREBBP_TARGETS_DN	XU_CREBBP_TARGETS_DN		42	-0.241445	-1.83803	0.012024	0.0458919	1	7872	tags=64%, list=40%, signal=107%
ELVIDGE_HYPOXIA_BY_DMOG_DN	ELVIDGE_HYPOXIA_BY_DMOG_DN		52	-0.214829	-1.83641	0.00594059	0.0461885	1	12752	tags=87%, list=65%, signal=247%
NIKOLSKY_BREAST_CANCER_8Q23_Q24_AMPLICON	NIKOLSKY_BREAST_CANCER_8Q23_Q24_AMPLICON		133	-0.136374	-1.83589	0.0117188	0.0462638	1	5594	tags=42%, list=29%, signal=59%
BIOCARTA_GCR_PATHWAY	BIOCARTA_GCR_PATHWAY		19	-0.343964	-1.83587	0.0119522	0.0462041	1	11824	tags=95%, list=60%, signal=239%
WANG_RESPONSE_TO_FORSKOLIN_UP	WANG_RESPONSE_TO_FORSKOLIN_UP		22	-0.323794	-1.83455	0.0203252	0.0464395	1	11470	tags=91%, list=59%, signal=219%
HONRADO_BREAST_CANCER_BRCA1_VS_BRCA2	HONRADO_BREAST_CANCER_BRCA1_VS_BRCA2		17	-0.368773	-1.83236	0.00397614	0.0469442	1	4305	tags=59%, list=22%, signal=75%
STEIN_ESRRA_TARGETS_RESPONSIVE_TO_ESTROGEN_DN	STEIN_ESRRA_TARGETS_RESPONSIVE_TO_ESTROGEN_DN		37	-0.251804	-1.83043	0.0140845	0.0473376	1	8311	tags=68%, list=42%, signal=117%
SCHAEFFER_PROSTATE_DEVELOPMENT_48HR_UP	SCHAEFFER_PROSTATE_DEVELOPMENT_48HR_UP		418	-0.0775118	-1.82959	0.0134357	0.0475179	1	7370	tags=45%, list=38%, signal=71%
NGO_MALIGNANT_GLIOMA_1P_LOH	NGO_MALIGNANT_GLIOMA_1P_LOH		15	-0.397428	-1.82718	0.0125	0.0481171	1	6585	tags=73%, list=34%, signal=110%
PID_AR_PATHWAY	PID_AR_PATHWAY		57	-0.203898	-1.82038	0.0174419	0.0498213	1	14572	tags=95%, list=74%, signal=369%
OLSSON_E2F3_TARGETS_DN	OLSSON_E2F3_TARGETS_DN		40	-0.243307	-1.82035	0.0212314	0.0497474	1	7975	tags=65%, list=41%, signal=109%
BHATI_G2M_ARREST_BY_2METHOXYESTRADIOL_DN	BHATI_G2M_ARREST_BY_2METHOXYESTRADIOL_DN		115	-0.142935	-1.82021	0.0139442	0.0497051	1	9479	tags=63%, list=48%, signal=121%
BURTON_ADIPOGENESIS_6	BURTON_ADIPOGENESIS_6		170	-0.120885	-1.82	0.0191571	0.0496887	1	10556	tags=66%, list=54%, signal=142%

## Sheet: Supplementary Table 8
Supplementary Table 8. K562 Gene Set Enrichment Analysis positively enriched (upregulated) (p value< 0.05, FDR<0.2)
NAME	GS<br> follow link to MSigDB	GS DETAILS	SIZE	ES	NES	NOM p-val	FDR q-val	FWER p-val	RANK AT MAX	LEADING EDGE
SHEN_SMARCA2_TARGETS_UP	SHEN_SMARCA2_TARGETS_UP	Details ...	397	0.381657	8.84223	0	0	0	10060	tags=89%, list=51%, signal=178%
MILI_PSEUDOPODIA_HAPTOTAXIS_UP	MILI_PSEUDOPODIA_HAPTOTAXIS_UP	Details ...	463	0.337353	8.34962	0	0	0	10573	tags=87%, list=54%, signal=184%
GARY_CD5_TARGETS_DN	GARY_CD5_TARGETS_DN	Details ...	394	0.307447	6.89281	0	0	0	10423	tags=83%, list=53%, signal=174%
ALL_MSI1_BS	ALL_MSI1_BS	Details ...	299	0.33134	6.43559	0	0	0	10069	tags=84%, list=51%, signal=170%
ZHANG_BREAST_CANCER_PROGENITORS_UP	ZHANG_BREAST_CANCER_PROGENITORS_UP	Details ...	387	0.276129	6.4232	0	0	0	10761	tags=82%, list=55%, signal=178%
OSMAN_BLADDER_CANCER_UP	OSMAN_BLADDER_CANCER_UP	Details ...	368	0.283339	6.4104	0	0	0	10487	tags=81%, list=53%, signal=171%
ZHANG_TLX_TARGETS_36HR_DN	ZHANG_TLX_TARGETS_36HR_DN	Details ...	175	0.410987	6.29894	0	0	0	7256	tags=78%, list=37%, signal=122%
ENK_UV_RESPONSE_KERATINOCYTE_DN	ENK_UV_RESPONSE_KERATINOCYTE_DN	Details ...	449	0.258799	6.27438	0	0	0	10202	tags=77%, list=52%, signal=157%
BIDUS_METASTASIS_UP	BIDUS_METASTASIS_UP	Details ...	198	0.383962	6.26278	0	0	0	9785	tags=88%, list=50%, signal=174%
BORCZUK_MALIGNANT_MESOTHELIOMA_UP	BORCZUK_MALIGNANT_MESOTHELIOMA_UP	Details ...	276	0.323278	6.14569	0	0	0	11519	tags=91%, list=59%, signal=216%
3UTR_CLIP_CHIP_MSI1	3UTR_CLIP_CHIP_MSI1	Details ...	257	0.322391	6.06804	0	0	0	10019	tags=83%, list=51%, signal=167%
MARTINEZ_RESPONSE_TO_TRABECTEDIN_DN	MARTINEZ_RESPONSE_TO_TRABECTEDIN_DN	Details ...	259	0.31839	6.06291	0	0	0	9820	tags=81%, list=50%, signal=161%
PUJANA_BRCA2_PCC_NETWORK	PUJANA_BRCA2_PCC_NETWORK	Details ...	391	0.265848	6.00471	0	0	0	11498	tags=85%, list=59%, signal=200%
ROME_INSULIN_TARGETS_IN_MUSCLE_UP	ROME_INSULIN_TARGETS_IN_MUSCLE_UP	Details ...	393	0.263705	5.96747	0	0	0	10157	tags=78%, list=52%, signal=158%
SCHLOSSER_MYC_TARGETS_REPRESSED_BY_SERUM	SCHLOSSER_MYC_TARGETS_REPRESSED_BY_SERUM	Details ...	145	0.419055	5.9227	0	0	0	9971	tags=92%, list=51%, signal=186%
BERENJENO_TRANSFORMED_BY_RHOA_UP	BERENJENO_TRANSFORMED_BY_RHOA_UP	Details ...	492	0.231281	5.90284	0	0	0	13602	tags=92%, list=69%, signal=292%
RHEIN_ALL_GLUCOCORTICOID_THERAPY_DN	RHEIN_ALL_GLUCOCORTICOID_THERAPY_DN	Details ...	335	0.278063	5.86533	0	0	0	10627	tags=81%, list=54%, signal=175%
REACTOME_CELL_CYCLE	REACTOME_CELL_CYCLE	Details ...	367	0.253645	5.81536	0	0	0	12706	tags=90%, list=65%, signal=250%
DACOSTA_UV_RESPONSE_VIA_ERCC3_COMMON_DN	DACOSTA_UV_RESPONSE_VIA_ERCC3_COMMON_DN	Details ...	460	0.235707	5.75769	0	0	0	10498	tags=77%, list=53%, signal=161%
SHEDDEN_LUNG_CANCER_POOR_SURVIVAL_A6	SHEDDEN_LUNG_CANCER_POOR_SURVIVAL_A6	Details ...	408	0.251132	5.67299	0	0	0	10516	tags=78%, list=54%, signal=165%
WEST_ADRENOCORTICAL_TUMOR_UP	WEST_ADRENOCORTICAL_TUMOR_UP	Details ...	271	0.294312	5.61592	0	0	0	10306	tags=82%, list=53%, signal=169%
HSIAO_HOUSEKEEPING_GENES	HSIAO_HOUSEKEEPING_GENES	Details ...	369	0.249717	5.5345	0	0	0	12155	tags=86%, list=62%, signal=223%
REACTOME_CELL_CYCLE_MITOTIC	REACTOME_CELL_CYCLE_MITOTIC	Details ...	286	0.28691	5.52843	0	0	0	12839	tags=94%, list=65%, signal=267%
DEBIASI_APOPTOSIS_BY_REOVIRUS_INFECTION_UP	DEBIASI_APOPTOSIS_BY_REOVIRUS_INFECTION_UP	Details ...	285	0.277989	5.50472	0	0	0	9220	tags=74%, list=47%, signal=138%
WONG_EMBRYONIC_STEM_CELL_CORE	WONG_EMBRYONIC_STEM_CELL_CORE	Details ...	308	0.268249	5.46894	0	0	0	12848	tags=92%, list=65%, signal=262%
REACTOME_METABOLISM_OF_RNA	REACTOME_METABOLISM_OF_RNA	Details ...	234	0.304513	5.39916	0	0	0	10028	tags=81%, list=51%, signal=164%
WINNEPENNINCKX_MELANOMA_METASTASIS_UP	WINNEPENNINCKX_MELANOMA_METASTASIS_UP	Details ...	144	0.373527	5.30184	0	0	0	10302	tags=90%, list=52%, signal=187%
PUJANA_XPRSS_INT_NETWORK	PUJANA_XPRSS_INT_NETWORK	Details ...	157	0.368857	5.30126	0	0	0	10817	tags=92%, list=55%, signal=203%
MIDDLECDS_CLIP_CHIP_MSI1	MIDDLECDS_CLIP_CHIP_MSI1	Details ...	305	0.26321	5.2521	0	0	0	10098	tags=77%, list=51%, signal=157%
HORIUCHI_WTAP_TARGETS_DN	HORIUCHI_WTAP_TARGETS_DN	Details ...	274	0.279287	5.2152	0	0	0	10494	tags=81%, list=53%, signal=172%
MANALO_HYPOXIA_DN	MANALO_HYPOXIA_DN	Details ...	259	0.270381	5.08373	0	0	0	12568	tags=91%, list=64%, signal=249%
REACTOME_METABOLISM_OF_MRNA	REACTOME_METABOLISM_OF_MRNA	Details ...	191	0.316185	5.07159	0	0	0	10293	tags=84%, list=52%, signal=174%
TOYOTA_TARGETS_OF_MIR34B_AND_MIR34C	TOYOTA_TARGETS_OF_MIR34B_AND_MIR34C	Details ...	395	0.219881	4.96903	0	0	0	10625	tags=76%, list=54%, signal=162%
MOREAUX_MULTIPLE_MYELOMA_BY_TACI_DN	MOREAUX_MULTIPLE_MYELOMA_BY_TACI_DN	Details ...	147	0.344947	4.93898	0	0	0	10501	tags=88%, list=54%, signal=187%
CHIANG_LIVER_CANCER_SUBCLASS_UNANNOTATED_DN	CHIANG_LIVER_CANCER_SUBCLASS_UNANNOTATED_DN	Details ...	175	0.321125	4.90969	0	0	0	11022	tags=88%, list=56%, signal=199%
ZHANG_TLX_TARGETS_60HR_DN	ZHANG_TLX_TARGETS_60HR_DN	Details ...	252	0.26229	4.9026	0	0	0	10492	tags=79%, list=53%, signal=168%
MITSIADES_RESPONSE_TO_APLIDIN_DN	MITSIADES_RESPONSE_TO_APLIDIN_DN	Details ...	233	0.279648	4.88514	0	0	0	10494	tags=81%, list=53%, signal=172%
BOYAULT_LIVER_CANCER_SUBCLASS_G3_UP	BOYAULT_LIVER_CANCER_SUBCLASS_G3_UP	Details ...	176	0.322112	4.88474	0	0	0	11128	tags=89%, list=57%, signal=203%
WANG_TUMOR_INVASIVENESS_UP	WANG_TUMOR_INVASIVENESS_UP	Details ...	346	0.233226	4.84884	0	0	0	9795	tags=73%, list=50%, signal=143%
JOHNSTONE_PARVB_TARGETS_2_DN	JOHNSTONE_PARVB_TARGETS_2_DN	Details ...	307	0.236481	4.81216	0	0	0	10452	tags=77%, list=53%, signal=161%
WANG_LMO4_TARGETS_DN	WANG_LMO4_TARGETS_DN	Details ...	309	0.232506	4.78274	0	0	0	10051	tags=74%, list=51%, signal=150%
STARK_PREFRONTAL_CORTEX_22Q11_DELETION_DN	STARK_PREFRONTAL_CORTEX_22Q11_DELETION_DN	Details ...	431	0.197834	4.77693	0	0	0	14004	tags=91%, list=71%, signal=310%
KIM_WT1_TARGETS_DN	KIM_WT1_TARGETS_DN	Details ...	406	0.204043	4.75475	0	0	0	10046	tags=71%, list=51%, signal=143%
LINDGREN_BLADDER_CANCER_CLUSTER_3_UP	LINDGREN_BLADDER_CANCER_CLUSTER_3_UP	Details ...	299	0.238026	4.752	0	0	0	10494	tags=77%, list=53%, signal=163%
MUELLER_PLURINET	MUELLER_PLURINET	Details ...	271	0.248383	4.74043	0	0	0	12643	tags=89%, list=64%, signal=247%
CHEN_HOXA5_TARGETS_9HR_UP	CHEN_HOXA5_TARGETS_9HR_UP	Details ...	200	0.287301	4.70289	0	0	0	11687	tags=88%, list=60%, signal=215%
GRADE_COLON_AND_RECTAL_CANCER_UP	GRADE_COLON_AND_RECTAL_CANCER_UP	Details ...	255	0.251949	4.6907	0	0	0	13511	tags=94%, list=69%, signal=297%
REACTOME_MRNA_PROCESSING	REACTOME_MRNA_PROCESSING	Details ...	146	0.330477	4.6843	0	0	0	10094	tags=84%, list=51%, signal=172%
DUTERTRE_ESTRADIOL_RESPONSE_24HR_UP	DUTERTRE_ESTRADIOL_RESPONSE_24HR_UP	Details ...	300	0.232049	4.6818	0	0	0	10494	tags=76%, list=53%, signal=162%
SENGUPTA_NASOPHARYNGEAL_CARCINOMA_WITH_LMP1_UP	SENGUPTA_NASOPHARYNGEAL_CARCINOMA_WITH_LMP1_UP	Details ...	360	0.209946	4.66902	0	0	0	7020	tags=56%, list=36%, signal=86%
GABRIELY_MIR21_TARGETS	GABRIELY_MIR21_TARGETS		262	0.242071	4.64725	0	0	0	9318	tags=71%, list=47%, signal=134%
REACTOME_DNA_REPLICATION	REACTOME_DNA_REPLICATION		170	0.304271	4.64199	0	0	0	10471	tags=84%, list=53%, signal=178%
MARTORIATI_MDM4_TARGETS_FETAL_LIVER_DN	MARTORIATI_MDM4_TARGETS_FETAL_LIVER_DN		468	0.183275	4.63678	0	0	0	9193	tags=65%, list=47%, signal=119%
PUJANA_BRCA_CENTERED_NETWORK	PUJANA_BRCA_CENTERED_NETWORK		111	0.378779	4.63036	0	0	0	10817	tags=93%, list=55%, signal=206%
PENG_GLUTAMINE_DEPRIVATION_DN	PENG_GLUTAMINE_DEPRIVATION_DN		306	0.23195	4.62329	0	0	0	13923	tags=94%, list=71%, signal=318%
TARTE_PLASMA_CELL_VS_PLASMABLAST_DN	TARTE_PLASMA_CELL_VS_PLASMABLAST_DN		287	0.233257	4.60791	0	0	0	10941	tags=79%, list=56%, signal=175%
MONNIER_POSTRADIATION_TUMOR_ESCAPE_UP	MONNIER_POSTRADIATION_TUMOR_ESCAPE_UP		366	0.209661	4.58473	0	0	0	10652	tags=75%, list=54%, signal=161%
DAZARD_RESPONSE_TO_UV_NHEK_DN	DAZARD_RESPONSE_TO_UV_NHEK_DN		285	0.234977	4.54929	0	0	0	10878	tags=79%, list=55%, signal=174%
SPIELMAN_LYMPHOBLAST_EUROPEAN_VS_ASIAN_UP	SPIELMAN_LYMPHOBLAST_EUROPEAN_VS_ASIAN_UP		445	0.187404	4.52531	0	0	0	14220	tags=91%, list=72%, signal=322%
SOTIRIOU_BREAST_CANCER_GRADE_1_VS_3_UP	SOTIRIOU_BREAST_CANCER_GRADE_1_VS_3_UP		134	0.335908	4.52217	0	0	0	10586	tags=87%, list=54%, signal=188%
BENPORATH_PROLIFERATION	BENPORATH_PROLIFERATION		129	0.345441	4.45867	0	0	0	10302	tags=87%, list=52%, signal=182%
MSI2_SHRNA_UP	MSI2_SHRNA_UP		140	0.330042	4.44316	0	0	0	10809	tags=88%, list=55%, signal=194%
FERREIRA_EWINGS_SARCOMA_UNSTABLE_VS_STABLE_UP	FERREIRA_EWINGS_SARCOMA_UNSTABLE_VS_STABLE_UP		141	0.313969	4.4123	0	0	0	10026	tags=82%, list=51%, signal=167%
REACTOME_PROCESSING_OF_CAPPED_INTRON_CONTAINING_PRE_MRNA	REACTOME_PROCESSING_OF_CAPPED_INTRON_CONTAINING_PRE_MRNA		128	0.331465	4.39521	0	0	0	10094	tags=84%, list=51%, signal=173%
REACTOME_MITOTIC_M_M_G1_PHASES	REACTOME_MITOTIC_M_M_G1_PHASES		151	0.309784	4.38926	0	0	0	10471	tags=84%, list=53%, signal=179%
MOOTHA_HUMAN_MITODB_6_2002	MOOTHA_HUMAN_MITODB_6_2002		395	0.186248	4.38911	0	0	0	14004	tags=90%, list=71%, signal=307%
MARKEY_RB1_ACUTE_LOF_UP	MARKEY_RB1_ACUTE_LOF_UP		214	0.262423	4.3722	0	0	0	10494	tags=79%, list=53%, signal=169%
KEGG_SPLICEOSOME	KEGG_SPLICEOSOME		115	0.346372	4.33989	0	0	0	10988	tags=90%, list=56%, signal=204%
KAUFFMANN_DNA_REPAIR_GENES	KAUFFMANN_DNA_REPAIR_GENES		211	0.263136	4.33054	0	0	0	13770	tags=96%, list=70%, signal=319%
FOURNIER_ACINAR_DEVELOPMENT_LATE_2	FOURNIER_ACINAR_DEVELOPMENT_LATE_2		256	0.234408	4.31223	0	0	0	12706	tags=88%, list=65%, signal=246%
GENTILE_UV_HIGH_DOSE_DN	GENTILE_UV_HIGH_DOSE_DN		287	0.221209	4.29472	0	0	0	10080	tags=73%, list=51%, signal=148%
FLECHNER_PBL_KIDNEY_TRANSPLANT_OK_VS_DONOR_UP	FLECHNER_PBL_KIDNEY_TRANSPLANT_OK_VS_DONOR_UP		142	0.308047	4.29166	0	0	0	10028	tags=82%, list=51%, signal=166%
LIU_SOX4_TARGETS_DN	LIU_SOX4_TARGETS_DN		275	0.220954	4.27055	0	0	0	13349	tags=90%, list=68%, signal=277%
PYEON_CANCER_HEAD_AND_NECK_VS_CERVICAL_UP	PYEON_CANCER_HEAD_AND_NECK_VS_CERVICAL_UP		162	0.285723	4.24896	0	0	0	9822	tags=78%, list=50%, signal=156%
DMAP_MONO.VS.HSC_DN	DMAP_MONO.VS.HSC_DN		319	0.205239	4.24844	0	0	0	10985	tags=76%, list=56%, signal=170%
OSMAN_BLADDER_CANCER_DN	OSMAN_BLADDER_CANCER_DN		337	0.201876	4.20951	0	0	0	12002	tags=81%, list=61%, signal=205%
REACTOME_CELL_CYCLE_CHECKPOINTS	REACTOME_CELL_CYCLE_CHECKPOINTS		106	0.355051	4.18881	0	0	0	10471	tags=89%, list=53%, signal=189%
BLUM_RESPONSE_TO_SALIRASIB_DN	BLUM_RESPONSE_TO_SALIRASIB_DN		317	0.199178	4.17877	0	0	0	11134	tags=76%, list=57%, signal=174%
REACTOME_METABOLISM_OF_PROTEINS	REACTOME_METABOLISM_OF_PROTEINS		398	0.180504	4.17138	0	0	0	12454	tags=81%, list=63%, signal=218%
DAZARD_RESPONSE_TO_UV_SCC_UP	DAZARD_RESPONSE_TO_UV_SCC_UP		105	0.345797	4.15822	0	0	0	10817	tags=90%, list=55%, signal=198%
ROSTY_CERVICAL_CANCER_PROLIFERATION_CLUSTER	ROSTY_CERVICAL_CANCER_PROLIFERATION_CLUSTER		126	0.316406	4.15261	0	0	0	10494	tags=85%, list=53%, signal=181%
MOHANKUMAR_TLX1_TARGETS_UP	MOHANKUMAR_TLX1_TARGETS_UP		365	0.183065	4.13473	0	0	0	10129	tags=70%, list=52%, signal=141%
REACTOME_TRANSLATION	REACTOME_TRANSLATION		135	0.301561	4.11007	0	0	0	10402	tags=83%, list=53%, signal=175%
PICCALUGA_ANGIOIMMUNOBLASTIC_LYMPHOMA_DN	PICCALUGA_ANGIOIMMUNOBLASTIC_LYMPHOMA_DN		121	0.319406	4.10671	0	0	0	10636	tags=86%, list=54%, signal=187%
ZHANG_TLX_TARGETS_DN	ZHANG_TLX_TARGETS_DN		82	0.381721	4.09954	0	0	0	7616	tags=77%, list=39%, signal=125%
FUJII_YBX1_TARGETS_DN	FUJII_YBX1_TARGETS_DN		190	0.25672	4.09167	0	0	0	10502	tags=79%, list=54%, signal=168%
MITSIADES_RESPONSE_TO_APLIDIN_UP	MITSIADES_RESPONSE_TO_APLIDIN_UP		396	0.178003	4.08292	0	0	0	11492	tags=76%, list=59%, signal=180%
PENG_RAPAMYCIN_RESPONSE_DN	PENG_RAPAMYCIN_RESPONSE_DN		213	0.242546	4.06084	0	0	0	11874	tags=85%, list=61%, signal=212%
SENGUPTA_NASOPHARYNGEAL_CARCINOMA_UP	SENGUPTA_NASOPHARYNGEAL_CARCINOMA_UP		263	0.213595	4.03133	0	0	0	9294	tags=68%, list=47%, signal=128%
YAO_TEMPORAL_RESPONSE_TO_PROGESTERONE_CLUSTER_17	YAO_TEMPORAL_RESPONSE_TO_PROGESTERONE_CLUSTER_17		156	0.280759	4.02515	0	0	0	12647	tags=92%, list=64%, signal=258%
SCHAEFFER_PROSTATE_DEVELOPMENT_6HR_DN	SCHAEFFER_PROSTATE_DEVELOPMENT_6HR_DN		460	0.164487	3.99833	0	0	0	12588	tags=80%, list=64%, signal=219%
RAMALHO_STEMNESS_UP	RAMALHO_STEMNESS_UP		186	0.258116	3.99313	0	0	0	8697	tags=70%, list=44%, signal=124%
EPPERT_PROGENITOR	EPPERT_PROGENITOR		123	0.306613	3.98891	0	0	0	11250	tags=88%, list=57%, signal=204%
REACTOME_CLASS_I_MHC_MEDIATED_ANTIGEN_PROCESSING_PRESENTATION	REACTOME_CLASS_I_MHC_MEDIATED_ANTIGEN_PROCESSING_PRESENTATION		218	0.232785	3.98413	0	0	0	9794	tags=73%, list=50%, signal=144%
REACTOME_RNA_POL_II_TRANSCRIPTION	REACTOME_RNA_POL_II_TRANSCRIPTION		88	0.352966	3.95488	0	0	0	8936	tags=81%, list=46%, signal=147%
ZHOU_CELL_CYCLE_GENES_IN_IR_RESPONSE_24HR	ZHOU_CELL_CYCLE_GENES_IN_IR_RESPONSE_24HR		111	0.31457	3.95075	0	0	0	10302	tags=84%, list=52%, signal=175%
CHANG_CYCLING_GENES	CHANG_CYCLING_GENES		134	0.295545	3.94474	0	0	0	10494	tags=83%, list=53%, signal=177%
REACTOME_HIV_INFECTION	REACTOME_HIV_INFECTION		174	0.252322	3.92977	0	0	0	9978	tags=76%, list=51%, signal=153%
KOBAYASHI_EGFR_SIGNALING_24HR_DN	KOBAYASHI_EGFR_SIGNALING_24HR_DN		228	0.226573	3.92894	0	0	0	10494	tags=76%, list=53%, signal=161%
KONG_E2F3_TARGETS	KONG_E2F3_TARGETS		90	0.344762	3.91961	0	0	0	7873	tags=74%, list=40%, signal=124%
TIEN_INTESTINE_PROBIOTICS_24HR_DN	TIEN_INTESTINE_PROBIOTICS_24HR_DN		202	0.238217	3.91596	0	0	0	11887	tags=84%, list=61%, signal=211%
MOOTHA_MITOCHONDRIA	MOOTHA_MITOCHONDRIA		405	0.165921	3.914	0	0	0	14253	tags=89%, list=73%, signal=318%
OUELLET_OVARIAN_CANCER_INVASIVE_VS_LMP_UP	OUELLET_OVARIAN_CANCER_INVASIVE_VS_LMP_UP		109	0.328246	3.90653	0	0	0	9256	tags=80%, list=47%, signal=150%
REACTOME_INFLUENZA_LIFE_CYCLE	REACTOME_INFLUENZA_LIFE_CYCLE		126	0.300625	3.90315	0	0	0	10023	tags=81%, list=51%, signal=164%
GARCIA_TARGETS_OF_FLI1_AND_DAX1_DN	GARCIA_TARGETS_OF_FLI1_AND_DAX1_DN		153	0.270078	3.90166	0	0	0	12055	tags=88%, list=61%, signal=227%
DING_LUNG_CANCER_EXPRESSION_BY_COPY_NUMBER	DING_LUNG_CANCER_EXPRESSION_BY_COPY_NUMBER		94	0.340396	3.87305	0	0	0	6503	tags=67%, list=33%, signal=100%
WHITFIELD_CELL_CYCLE_G2_M	WHITFIELD_CELL_CYCLE_G2_M		189	0.245309	3.87295	0	0	0	10494	tags=78%, list=53%, signal=166%
SENESE_HDAC1_TARGETS_UP	SENESE_HDAC1_TARGETS_UP		405	0.167693	3.8608	0	0	0	11651	tags=76%, list=59%, signal=183%
REACTOME_MRNA_SPLICING	REACTOME_MRNA_SPLICING		100	0.329056	3.83193	0	0	0	11628	tags=92%, list=59%, signal=225%
WANG_CLIM2_TARGETS_DN	WANG_CLIM2_TARGETS_DN		167	0.259014	3.82787	0	0	0	9765	tags=75%, list=50%, signal=149%
LEE_LIVER_CANCER_SURVIVAL_DN	LEE_LIVER_CANCER_SURVIVAL_DN		156	0.271187	3.81179	0	0	0	10066	tags=78%, list=51%, signal=159%
GOLDRATH_HOMEOSTATIC_PROLIFERATION	GOLDRATH_HOMEOSTATIC_PROLIFERATION		154	0.263624	3.80448	0	0	0	10412	tags=79%, list=53%, signal=167%
KIM_ALL_DISORDERS_CALB1_CORR_UP	KIM_ALL_DISORDERS_CALB1_CORR_UP		495	0.151957	3.78539	0	0	0	11879	tags=75%, list=61%, signal=186%
BENPORATH_ES_1	BENPORATH_ES_1		343	0.176292	3.78246	0	0	0	9930	tags=68%, list=51%, signal=135%
JISON_SICKLE_CELL_DISEASE_DN	JISON_SICKLE_CELL_DISEASE_DN		161	0.257135	3.78143	0	0	0	12180	tags=88%, list=62%, signal=229%
REACTOME_GENERIC_TRANSCRIPTION_PATHWAY	REACTOME_GENERIC_TRANSCRIPTION_PATHWAY		308	0.188541	3.77932	0	0	0	11202	tags=76%, list=57%, signal=174%
BRUINS_UVC_RESPONSE_EARLY_LATE	BRUINS_UVC_RESPONSE_EARLY_LATE		276	0.196258	3.77717	0	0	0	12199	tags=82%, list=62%, signal=212%
GARGALOVIC_RESPONSE_TO_OXIDIZED_PHOSPHOLIPIDS_BLUE_UP	GARGALOVIC_RESPONSE_TO_OXIDIZED_PHOSPHOLIPIDS_BLUE_UP		114	0.303943	3.75944	0	0	0	10594	tags=84%, list=54%, signal=182%
WHITFIELD_CELL_CYCLE_M_G1	WHITFIELD_CELL_CYCLE_M_G1		133	0.279719	3.75865	0	0	0	7826	tags=68%, list=40%, signal=112%
WANG_LMO4_TARGETS_UP	WANG_LMO4_TARGETS_UP		322	0.177382	3.73452	0	0	0	13456	tags=86%, list=69%, signal=269%
GINESTIER_BREAST_CANCER_20Q13_AMPLIFICATION_DN	GINESTIER_BREAST_CANCER_20Q13_AMPLIFICATION_DN		146	0.265224	3.71107	0	0	0	13381	tags=95%, list=68%, signal=295%
STEIN_ESRRA_TARGETS	STEIN_ESRRA_TARGETS		468	0.148959	3.70988	0	0	0	14211	tags=87%, list=72%, signal=308%
SAKAI_CHRONIC_HEPATITIS_VS_LIVER_CANCER_UP	SAKAI_CHRONIC_HEPATITIS_VS_LIVER_CANCER_UP		76	0.367843	3.70192	0	0	0	8817	tags=82%, list=45%, signal=148%
BLUM_RESPONSE_TO_SALIRASIB_UP	BLUM_RESPONSE_TO_SALIRASIB_UP		228	0.208385	3.70069	0	0	0	12482	tags=84%, list=64%, signal=229%
GRAHAM_CML_DIVIDING_VS_NORMAL_QUIESCENT_UP	GRAHAM_CML_DIVIDING_VS_NORMAL_QUIESCENT_UP		170	0.240469	3.69109	0	0	0	11943	tags=85%, list=61%, signal=215%
KEGG_UBIQUITIN_MEDIATED_PROTEOLYSIS	KEGG_UBIQUITIN_MEDIATED_PROTEOLYSIS		126	0.282536	3.6885	0	0	0	9597	tags=77%, list=49%, signal=150%
WHITFIELD_CELL_CYCLE_S	WHITFIELD_CELL_CYCLE_S		142	0.272065	3.67579	0	0	0	10038	tags=78%, list=51%, signal=159%
REACTOME_SRP_DEPENDENT_COTRANSLATIONAL_PROTEIN_TARGETING_TO_MEMBRANE	REACTOME_SRP_DEPENDENT_COTRANSLATIONAL_PROTEIN_TARGETING_TO_MEMBRANE		100	0.301688	3.67023	0	0	0	10200	tags=82%, list=52%, signal=170%
RICKMAN_TUMOR_DIFFERENTIATED_WELL_VS_POORLY_UP	RICKMAN_TUMOR_DIFFERENTIATED_WELL_VS_POORLY_UP		207	0.219125	3.65864	0	0	0	10912	tags=77%, list=56%, signal=172%
REACTOME_ANTIGEN_PROCESSING_UBIQUITINATION_PROTEASOME_DEGRADATION	REACTOME_ANTIGEN_PROCESSING_UBIQUITINATION_PROTEASOME_DEGRADATION		185	0.235623	3.6514	0	0	0	10587	tags=77%, list=54%, signal=166%
HOFFMANN_LARGE_TO_SMALL_PRE_BII_LYMPHOCYTE_UP	HOFFMANN_LARGE_TO_SMALL_PRE_BII_LYMPHOCYTE_UP		150	0.253775	3.6476	0	0	0	10494	tags=79%, list=53%, signal=168%
CHANDRAN_METASTASIS_UP	CHANDRAN_METASTASIS_UP		188	0.2285	3.63	0	0	0	11006	tags=79%, list=56%, signal=178%
DANG_MYC_TARGETS_UP	DANG_MYC_TARGETS_UP		130	0.271095	3.62472	0	0	0	10262	tags=79%, list=52%, signal=165%
WILCOX_RESPONSE_TO_PROGESTERONE_UP	WILCOX_RESPONSE_TO_PROGESTERONE_UP		135	0.267005	3.62293	0	0	0	10494	tags=80%, list=53%, signal=171%
RICKMAN_METASTASIS_UP	RICKMAN_METASTASIS_UP		309	0.176891	3.61191	0	0	0	9347	tags=65%, list=48%, signal=122%
PENG_LEUCINE_DEPRIVATION_DN	PENG_LEUCINE_DEPRIVATION_DN		173	0.235895	3.60776	0	0	0	14013	tags=95%, list=71%, signal=329%
SESTO_RESPONSE_TO_UV_C0	SESTO_RESPONSE_TO_UV_C0		99	0.302234	3.58726	0	0	0	10748	tags=85%, list=55%, signal=187%
MILI_PSEUDOPODIA_CHEMOTAXIS_DN	MILI_PSEUDOPODIA_CHEMOTAXIS_DN		414	0.149953	3.57163	0	0	0	14893	tags=91%, list=76%, signal=368%
BILANGES_RAPAMYCIN_SENSITIVE_VIA_TSC1_AND_TSC2	BILANGES_RAPAMYCIN_SENSITIVE_VIA_TSC1_AND_TSC2		65	0.377531	3.56474	0	0	0	10125	tags=89%, list=52%, signal=184%
SOMERVAILLE.HIGHLSC_UP	SOMERVAILLE.HIGHLSC_UP		121	0.273948	3.56427	0	0	0	11036	tags=83%, list=56%, signal=190%
NOUZOVA_TRETINOIN_AND_H4_ACETYLATION	NOUZOVA_TRETINOIN_AND_H4_ACETYLATION		123	0.272767	3.55835	0	0	0	11910	tags=88%, list=61%, signal=222%
IVANOVA_HEMATOPOIESIS_LATE_PROGENITOR	IVANOVA_HEMATOPOIESIS_LATE_PROGENITOR		467	0.145869	3.55681	0	0	0	10861	tags=70%, list=55%, signal=152%
MOREAUX_B_LYMPHOCYTE_MATURATION_BY_TACI_DN	MOREAUX_B_LYMPHOCYTE_MATURATION_BY_TACI_DN		62	0.385384	3.54771	0	0	0	10501	tags=92%, list=54%, signal=197%
KAUFFMANN_MELANOMA_RELAPSE_UP	KAUFFMANN_MELANOMA_RELAPSE_UP		56	0.397013	3.51544	0	0	0	10452	tags=93%, list=53%, signal=198%
REACTOME_MITOTIC_G1_G1_S_PHASES	REACTOME_MITOTIC_G1_G1_S_PHASES		122	0.276211	3.51077	0	0	0	12788	tags=93%, list=65%, signal=264%
DE_YY1_TARGETS_DN	DE_YY1_TARGETS_DN		88	0.324711	3.50874	0	0	0	8596	tags=76%, list=44%, signal=135%
WANG_TUMOR_INVASIVENESS_DN	WANG_TUMOR_INVASIVENESS_DN		195	0.216441	3.49768	0	0	0	13505	tags=90%, list=69%, signal=287%
MORI_IMMATURE_B_LYMPHOCYTE_DN	MORI_IMMATURE_B_LYMPHOCYTE_DN		88	0.318871	3.49147	0	0	0	10494	tags=85%, list=53%, signal=182%
GARY_CD5_TARGETS_UP	GARY_CD5_TARGETS_UP		429	0.14457	3.48025	0	0	0	14926	tags=90%, list=76%, signal=369%
MSI2_BINDING_MS20	MSI2_BINDING_MS20		115	0.277579	3.47879	0	0	0	12330	tags=90%, list=63%, signal=242%
CROONQUIST_IL6_DEPRIVATION_DN	CROONQUIST_IL6_DEPRIVATION_DN		94	0.307884	3.47741	0	0	0	10478	tags=84%, list=53%, signal=179%
WHITFIELD_CELL_CYCLE_G2	WHITFIELD_CELL_CYCLE_G2		163	0.235311	3.46609	0	0	0	10107	tags=75%, list=52%, signal=153%
YOSHIMURA_MAPK8_TARGETS_DN	YOSHIMURA_MAPK8_TARGETS_DN		339	0.159618	3.46482	0	0	0	10466	tags=69%, list=53%, signal=145%
MSI1_TARGETS_UP	MSI1_TARGETS_UP		100	0.290711	3.45579	0	0	0	11003	tags=85%, list=56%, signal=193%
SARRIO_EPITHELIAL_MESENCHYMAL_TRANSITION_UP	SARRIO_EPITHELIAL_MESENCHYMAL_TRANSITION_UP		164	0.226286	3.45387	0	0	0	12706	tags=87%, list=65%, signal=245%
KEGG_CELL_CYCLE	KEGG_CELL_CYCLE		118	0.269676	3.45227	0	0	0	12699	tags=92%, list=65%, signal=258%
MSI2_SHRNA_UP_FC0.8	MSI2_SHRNA_UP_FC0.8		50	0.412311	3.42822	0	0	0	9982	tags=92%, list=51%, signal=187%
GRAHAM_NORMAL_QUIESCENT_VS_NORMAL_DIVIDING_DN	GRAHAM_NORMAL_QUIESCENT_VS_NORMAL_DIVIDING_DN		82	0.320165	3.42562	0	0	0	10494	tags=85%, list=53%, signal=183%
PODAR_RESPONSE_TO_ADAPHOSTIN_UP	PODAR_RESPONSE_TO_ADAPHOSTIN_UP		132	0.251321	3.42479	0	0	0	11453	tags=83%, list=58%, signal=199%
REACTOME_3_UTR_MEDIATED_TRANSLATIONAL_REGULATION	REACTOME_3_UTR_MEDIATED_TRANSLATIONAL_REGULATION		96	0.294213	3.40723	0	0	0	10402	tags=82%, list=53%, signal=174%
REACTOME_LATE_PHASE_OF_HIV_LIFE_CYCLE	REACTOME_LATE_PHASE_OF_HIV_LIFE_CYCLE		88	0.31099	3.40489	0	0	0	9756	tags=81%, list=50%, signal=160%
REACTOME_NONSENSE_MEDIATED_DECAY_ENHANCED_BY_THE_EXON_JUNCTION_COMPLEX	REACTOME_NONSENSE_MEDIATED_DECAY_ENHANCED_BY_THE_EXON_JUNCTION_COMPLEX		98	0.292497	3.40332	0	0	0	10507	tags=83%, list=54%, signal=177%
ONKEN_UVEAL_MELANOMA_DN	ONKEN_UVEAL_MELANOMA_DN		475	0.13526	3.38421	0	7.76945e-06	0.001	10133	tags=65%, list=52%, signal=131%
MOOTHA_PGC	MOOTHA_PGC		384	0.148106	3.38234	0	7.72207e-06	0.001	13962	tags=86%, list=71%, signal=291%
HAHTOLA_MYCOSIS_FUNGOIDES_CD4_DN	HAHTOLA_MYCOSIS_FUNGOIDES_CD4_DN		109	0.278547	3.36335	0	7.67527e-06	0.001	11306	tags=85%, list=58%, signal=200%
WONG_MITOCHONDRIA_GENE_MODULE	WONG_MITOCHONDRIA_GENE_MODULE		200	0.205136	3.36215	0	7.62903e-06	0.001	10830	tags=76%, list=55%, signal=167%
PUIFFE_INVASION_INHIBITED_BY_ASCITES_DN	PUIFFE_INVASION_INHIBITED_BY_ASCITES_DN		129	0.24502	3.35471	0	7.58335e-06	0.001	7544	tags=63%, list=38%, signal=101%
IVANOVA_HEMATOPOIESIS_EARLY_PROGENITOR	IVANOVA_HEMATOPOIESIS_EARLY_PROGENITOR		468	0.136307	3.34927	0	7.53821e-06	0.001	12273	tags=76%, list=63%, signal=198%
REN_BOUND_BY_E2F	REN_BOUND_BY_E2F		56	0.378134	3.33976	0	7.49361e-06	0.001	10471	tags=91%, list=53%, signal=195%
MISSIAGLIA_REGULATED_BY_METHYLATION_DN	MISSIAGLIA_REGULATED_BY_METHYLATION_DN		112	0.270283	3.33477	0	7.44953e-06	0.001	10494	tags=80%, list=53%, signal=172%
REACTOME_REGULATION_OF_MITOTIC_CELL_CYCLE	REACTOME_REGULATION_OF_MITOTIC_CELL_CYCLE		72	0.337302	3.33242	0	7.40596e-06	0.001	10302	tags=86%, list=52%, signal=181%
REACTOME_S_PHASE	REACTOME_S_PHASE		100	0.284249	3.32741	0	7.3629e-06	0.001	12699	tags=93%, list=65%, signal=262%
BLALOCK_ALZHEIMERS_DISEASE_INCIPIENT_DN	BLALOCK_ALZHEIMERS_DISEASE_INCIPIENT_DN		154	0.233733	3.32542	0	7.32034e-06	0.001	10102	tags=75%, list=51%, signal=153%
REACTOME_REGULATION_OF_MRNA_STABILITY_BY_PROTEINS_THAT_BIND_AU_RICH_ELEMENTS	REACTOME_REGULATION_OF_MRNA_STABILITY_BY_PROTEINS_THAT_BIND_AU_RICH_ELEMENTS		72	0.336826	3.30689	0	7.27827e-06	0.001	11674	tags=93%, list=59%, signal=229%
REACTOME_TRANSCRIPTION	REACTOME_TRANSCRIPTION		176	0.212595	3.3065	0	7.23668e-06	0.001	9021	tags=67%, list=46%, signal=123%
SAKAI_TUMOR_INFILTRATING_MONOCYTES_DN	SAKAI_TUMOR_INFILTRATING_MONOCYTES_DN		75	0.320956	3.29512	0	7.19557e-06	0.001	9685	tags=81%, list=49%, signal=160%
HOSHIDA_LIVER_CANCER_SUBCLASS_S2	HOSHIDA_LIVER_CANCER_SUBCLASS_S2		110	0.266461	3.29206	0	7.15491e-06	0.001	9606	tags=75%, list=49%, signal=147%
SMITH_TERT_TARGETS_UP	SMITH_TERT_TARGETS_UP		137	0.244416	3.28189	0	7.11472e-06	0.001	10992	tags=80%, list=56%, signal=181%
KAUFFMANN_DNA_REPLICATION_GENES	KAUFFMANN_DNA_REPLICATION_GENES		131	0.242472	3.27778	0	7.07497e-06	0.001	13248	tags=92%, list=68%, signal=280%
VANOEVELEN_MYOGENESIS_SIN3A_TARGETS	VANOEVELEN_MYOGENESIS_SIN3A_TARGETS		198	0.200445	3.27496	0	7.03566e-06	0.001	11665	tags=79%, list=59%, signal=194%
REACTOME_HIV_LIFE_CYCLE	REACTOME_HIV_LIFE_CYCLE		100	0.284226	3.26455	0	6.99679e-06	0.001	9756	tags=78%, list=50%, signal=154%
REACTOME_MITOTIC_PROMETAPHASE	REACTOME_MITOTIC_PROMETAPHASE		75	0.325862	3.25886	0	6.95835e-06	0.001	10374	tags=85%, list=53%, signal=180%
REACTOME_TRANSPORT_OF_MATURE_TRANSCRIPT_TO_CYTOPLASM	REACTOME_TRANSPORT_OF_MATURE_TRANSCRIPT_TO_CYTOPLASM		50	0.3963	3.2511	0	6.92032e-06	0.001	9118	tags=86%, list=46%, signal=160%
BASAKI_YBX1_TARGETS_UP	BASAKI_YBX1_TARGETS_UP		259	0.17299	3.25	0	6.88271e-06	0.001	11196	tags=74%, list=57%, signal=170%
REACTOME_APC_C_CDC20_MEDIATED_DEGRADATION_OF_MITOTIC_PROTEINS	REACTOME_APC_C_CDC20_MEDIATED_DEGRADATION_OF_MITOTIC_PROTEINS		61	0.344877	3.2491	0	6.84551e-06	0.001	10302	tags=87%, list=52%, signal=182%
REACTOME_ADAPTIVE_IMMUNE_SYSTEM	REACTOME_ADAPTIVE_IMMUNE_SYSTEM		480	0.127999	3.23545	0	6.80871e-06	0.001	13288	tags=80%, list=68%, signal=242%
VECCHI_GASTRIC_CANCER_EARLY_UP	VECCHI_GASTRIC_CANCER_EARLY_UP		375	0.146088	3.23461	0	6.7723e-06	0.001	11211	tags=71%, list=57%, signal=164%
PAL_PRMT5_TARGETS_UP	PAL_PRMT5_TARGETS_UP		188	0.205421	3.23361	0	6.73627e-06	0.001	10202	tags=72%, list=52%, signal=149%
WELCSH_BRCA1_TARGETS_UP	WELCSH_BRCA1_TARGETS_UP		185	0.205189	3.23239	0	6.70063e-06	0.001	11815	tags=81%, list=60%, signal=201%
MALONEY_RESPONSE_TO_17AAG_DN	MALONEY_RESPONSE_TO_17AAG_DN		72	0.326352	3.22543	0	6.66537e-06	0.001	9971	tags=83%, list=51%, signal=169%
REACTOME_G1_S_TRANSITION	REACTOME_G1_S_TRANSITION		100	0.274198	3.22126	0	6.63047e-06	0.001	12699	tags=92%, list=65%, signal=259%
WANG_RESPONSE_TO_GSK3_INHIBITOR_SB216763_DN	WANG_RESPONSE_TO_GSK3_INHIBITOR_SB216763_DN		315	0.154536	3.20694	0	6.59593e-06	0.001	10471	tags=69%, list=53%, signal=145%
WHITEFORD_PEDIATRIC_CANCER_MARKERS	WHITEFORD_PEDIATRIC_CANCER_MARKERS		106	0.26935	3.19881	0	6.56176e-06	0.001	12699	tags=92%, list=65%, signal=258%
GALE_APL_WITH_FLT3_MUTATED_UP	GALE_APL_WITH_FLT3_MUTATED_UP		51	0.384589	3.19738	0	6.52794e-06	0.001	10171	tags=90%, list=52%, signal=187%
BROWNE_HCMV_INFECTION_14HR_UP	BROWNE_HCMV_INFECTION_14HR_UP		142	0.22944	3.19676	0	6.49446e-06	0.001	10592	tags=77%, list=54%, signal=166%
MORI_PLASMA_CELL_UP	MORI_PLASMA_CELL_UP		48	0.383659	3.18683	0	6.46132e-06	0.001	9659	tags=88%, list=49%, signal=172%
REICHERT_MITOSIS_LIN9_TARGETS	REICHERT_MITOSIS_LIN9_TARGETS		26	0.522505	3.18374	0	6.42852e-06	0.001	7873	tags=92%, list=40%, signal=154%
ACEVEDO_NORMAL_TISSUE_ADJACENT_TO_LIVER_TUMOR_UP	ACEVEDO_NORMAL_TISSUE_ADJACENT_TO_LIVER_TUMOR_UP		149	0.222044	3.18048	0	6.39606e-06	0.001	10030	tags=73%, list=51%, signal=149%
CHAUHAN_RESPONSE_TO_METHOXYESTRADIOL_DN	CHAUHAN_RESPONSE_TO_METHOXYESTRADIOL_DN		94	0.276048	3.17866	0	6.36392e-06	0.001	11726	tags=87%, list=60%, signal=216%
AGUIRRE_PANCREATIC_CANCER_COPY_NUMBER_DN	AGUIRRE_PANCREATIC_CANCER_COPY_NUMBER_DN		213	0.184046	3.17687	0	6.3321e-06	0.001	13378	tags=86%, list=68%, signal=268%
PID_FANCONI_PATHWAY	PID_FANCONI_PATHWAY		43	0.401683	3.17229	0	6.30059e-06	0.001	10388	tags=93%, list=53%, signal=197%
REACTOME_DNA_REPAIR	REACTOME_DNA_REPAIR		98	0.276741	3.17042	0	6.2694e-06	0.001	9413	tags=76%, list=48%, signal=144%
BURTON_ADIPOGENESIS_3	BURTON_ADIPOGENESIS_3		100	0.274198	3.16646	0	6.23852e-06	0.001	12699	tags=92%, list=65%, signal=259%
REACTOME_HOST_INTERACTIONS_OF_HIV_FACTORS	REACTOME_HOST_INTERACTIONS_OF_HIV_FACTORS		112	0.253071	3.16543	0	6.20794e-06	0.001	10129	tags=77%, list=52%, signal=158%
CHICAS_RB1_TARGETS_SENESCENT	CHICAS_RB1_TARGETS_SENESCENT		500	0.126695	3.16378	0	6.17766e-06	0.001	9507	tags=61%, list=48%, signal=115%
REACTOME_G2_M_CHECKPOINTS	REACTOME_G2_M_CHECKPOINTS		40	0.417191	3.15583	0	6.14767e-06	0.001	10471	tags=95%, list=53%, signal=203%
JIANG_HYPOXIA_NORMAL	JIANG_HYPOXIA_NORMAL		280	0.159723	3.15206	0	6.11797e-06	0.001	10155	tags=68%, list=52%, signal=138%
CHANG_CORE_SERUM_RESPONSE_UP	CHANG_CORE_SERUM_RESPONSE_UP		187	0.199028	3.14832	0	6.08855e-06	0.001	11976	tags=81%, list=61%, signal=205%
LINSLEY_MIR16_TARGETS	LINSLEY_MIR16_TARGETS		180	0.203867	3.14578	0	6.05942e-06	0.001	14241	tags=93%, list=73%, signal=335%
ZHENG_FOXP3_TARGETS_IN_THYMUS_UP	ZHENG_FOXP3_TARGETS_IN_THYMUS_UP		177	0.2037	3.13388	0	6.03057e-06	0.001	11448	tags=79%, list=58%, signal=187%
WHITFIELD_CELL_CYCLE_LITERATURE	WHITFIELD_CELL_CYCLE_LITERATURE		44	0.39834	3.12937	0	6.00199e-06	0.001	10039	tags=91%, list=51%, signal=186%
REACTOME_ER_PHAGOSOME_PATHWAY	REACTOME_ER_PHAGOSOME_PATHWAY		53	0.359008	3.12518	0	5.97368e-06	0.001	9264	tags=83%, list=47%, signal=157%
GENTILE_RESPONSE_CLUSTER_D3	GENTILE_RESPONSE_CLUSTER_D3		58	0.339297	3.12489	0	5.94563e-06	0.001	12307	tags=97%, list=63%, signal=258%
YAO_TEMPORAL_RESPONSE_TO_PROGESTERONE_CLUSTER_13	YAO_TEMPORAL_RESPONSE_TO_PROGESTERONE_CLUSTER_13		152	0.214427	3.11859	0	5.91785e-06	0.001	14285	tags=94%, list=73%, signal=343%
KAAB_FAILED_HEART_ATRIUM_DN	KAAB_FAILED_HEART_ATRIUM_DN		128	0.230536	3.10631	0	5.89032e-06	0.001	11755	tags=83%, list=60%, signal=205%
DACOSTA_UV_RESPONSE_VIA_ERCC3_UP	DACOSTA_UV_RESPONSE_VIA_ERCC3_UP		273	0.166793	3.10445	0	5.86305e-06	0.001	15532	tags=96%, list=79%, signal=452%
THUM_SYSTOLIC_HEART_FAILURE_DN	THUM_SYSTOLIC_HEART_FAILURE_DN		206	0.192062	3.10186	0	1.17791e-05	0.002	9701	tags=68%, list=49%, signal=134%
YU_MYC_TARGETS_UP	YU_MYC_TARGETS_UP		38	0.417964	3.10114	0	1.17251e-05	0.002	9887	tags=92%, list=50%, signal=185%
WU_APOPTOSIS_BY_CDKN1A_VIA_TP53	WU_APOPTOSIS_BY_CDKN1A_VIA_TP53		54	0.355034	3.08769	0	1.16715e-05	0.002	10494	tags=89%, list=53%, signal=191%
SEIDEN_ONCOGENESIS_BY_MET	SEIDEN_ONCOGENESIS_BY_MET		83	0.2886	3.08424	0	1.16185e-05	0.002	10200	tags=81%, list=52%, signal=167%
ALONSO_METASTASIS_UP	ALONSO_METASTASIS_UP		176	0.19441	3.07911	0	1.15659e-05	0.002	11939	tags=80%, list=61%, signal=203%
REACTOME_MRNA_3_END_PROCESSING	REACTOME_MRNA_3_END_PROCESSING		32	0.451551	3.07489	0	1.15138e-05	0.002	8936	tags=91%, list=46%, signal=166%
PUJANA_BREAST_CANCER_LIT_INT_NETWORK	PUJANA_BREAST_CANCER_LIT_INT_NETWORK		96	0.270433	3.07379	0	1.14622e-05	0.002	12706	tags=92%, list=65%, signal=259%
ZHAN_MULTIPLE_MYELOMA_PR_UP	ZHAN_MULTIPLE_MYELOMA_PR_UP		43	0.396269	3.06577	0	1.1411e-05	0.002	10494	tags=93%, list=53%, signal=200%
PENG_GLUCOSE_DEPRIVATION_DN	PENG_GLUCOSE_DEPRIVATION_DN		149	0.214047	3.06288	0	1.13603e-05	0.002	12688	tags=86%, list=65%, signal=241%
ODONNELL_TFRC_TARGETS_DN	ODONNELL_TFRC_TARGETS_DN		123	0.230843	3.04658	0	1.70881e-05	0.003	10494	tags=76%, list=53%, signal=163%
KEGG_RIBOSOME	KEGG_RIBOSOME		80	0.290355	3.04516	0	1.70128e-05	0.003	10023	tags=80%, list=51%, signal=163%
BENPORATH_OCT4_TARGETS	BENPORATH_OCT4_TARGETS		258	0.166336	3.04113	0	1.69382e-05	0.003	12598	tags=81%, list=64%, signal=222%
JI_RESPONSE_TO_FSH_DN	JI_RESPONSE_TO_FSH_DN		57	0.336166	3.03624	0	1.68642e-05	0.003	10979	tags=89%, list=56%, signal=203%
DEURIG_T_CELL_PROLYMPHOCYTIC_LEUKEMIA_DN	DEURIG_T_CELL_PROLYMPHOCYTIC_LEUKEMIA_DN		274	0.155863	3.03603	0	1.67909e-05	0.003	9731	tags=65%, list=50%, signal=127%
REACTOME_SYNTHESIS_OF_DNA	REACTOME_SYNTHESIS_OF_DNA		84	0.284464	3.03239	0	2.22891e-05	0.004	12195	tags=90%, list=62%, signal=238%
REACTOME_ORC1_REMOVAL_FROM_CHROMATIN	REACTOME_ORC1_REMOVAL_FROM_CHROMATIN		60	0.330047	3.02322	0	2.77072e-05	0.005	11203	tags=90%, list=57%, signal=209%
THEILGAARD_NEUTROPHIL_AT_SKIN_WOUND_DN	THEILGAARD_NEUTROPHIL_AT_SKIN_WOUND_DN		214	0.176705	3.02058	0	3.31173e-05	0.006	12066	tags=79%, list=61%, signal=203%
RHODES_UNDIFFERENTIATED_CANCER	RHODES_UNDIFFERENTIATED_CANCER		60	0.332853	3.01669	0	3.29757e-05	0.006	10494	tags=87%, list=53%, signal=186%
YAO_TEMPORAL_RESPONSE_TO_PROGESTERONE_CLUSTER_11	YAO_TEMPORAL_RESPONSE_TO_PROGESTERONE_CLUSTER_11		86	0.279022	3.01657	0	3.28354e-05	0.006	11889	tags=88%, list=61%, signal=223%
LOCKWOOD_AMPLIFIED_IN_LUNG_CANCER	LOCKWOOD_AMPLIFIED_IN_LUNG_CANCER		190	0.185785	3.01579	0	3.26963e-05	0.006	12810	tags=84%, list=65%, signal=239%
REACTOME_CLEAVAGE_OF_GROWING_TRANSCRIPT_IN_THE_TERMINATION_REGION_	REACTOME_CLEAVAGE_OF_GROWING_TRANSCRIPT_IN_THE_TERMINATION_REGION_		41	0.399057	3.01269	0	3.25583e-05	0.006	8936	tags=85%, list=46%, signal=156%
REN_ALVEOLAR_RHABDOMYOSARCOMA_DN	REN_ALVEOLAR_RHABDOMYOSARCOMA_DN		379	0.133167	3.00922	0	3.24215e-05	0.006	14367	tags=86%, list=73%, signal=316%
GAZDA_DIAMOND_BLACKFAN_ANEMIA_ERYTHROID_DN	GAZDA_DIAMOND_BLACKFAN_ANEMIA_ERYTHROID_DN		435	0.12693	3.00772	0	3.22859e-05	0.006	12089	tags=74%, list=62%, signal=189%
ABRAMSON_INTERACT_WITH_AIRE	ABRAMSON_INTERACT_WITH_AIRE		41	0.393993	3.0051	0	3.21513e-05	0.006	10471	tags=93%, list=53%, signal=198%
MORI_LARGE_PRE_BII_LYMPHOCYTE_UP	MORI_LARGE_PRE_BII_LYMPHOCYTE_UP		83	0.286831	3.00479	0	3.20179e-05	0.006	10471	tags=82%, list=53%, signal=175%
GEORGES_CELL_CYCLE_MIR192_TARGETS	GEORGES_CELL_CYCLE_MIR192_TARGETS		59	0.335048	3.0044	0	3.18856e-05	0.006	9076	tags=80%, list=46%, signal=148%
RAO_BOUND_BY_SALL4_ISOFORM_B	RAO_BOUND_BY_SALL4_ISOFORM_B		452	0.121936	3.00341	0	3.17544e-05	0.006	10425	tags=65%, list=53%, signal=136%
GOLDRATH_ANTIGEN_RESPONSE	GOLDRATH_ANTIGEN_RESPONSE		310	0.146166	3.00225	0	3.16243e-05	0.006	15090	tags=91%, list=77%, signal=389%
REACTOME_INFLUENZA_VIRAL_RNA_TRANSCRIPTION_AND_REPLICATION	REACTOME_INFLUENZA_VIRAL_RNA_TRANSCRIPTION_AND_REPLICATION		93	0.264619	3.00199	0	3.14952e-05	0.006	10023	tags=77%, list=51%, signal=158%
BOYAULT_LIVER_CANCER_SUBCLASS_G23_UP	BOYAULT_LIVER_CANCER_SUBCLASS_G23_UP		48	0.371957	3.0009	0	3.13672e-05	0.006	7844	tags=77%, list=40%, signal=128%
REACTOME_AUTODEGRADATION_OF_CDH1_BY_CDH1_APC_C	REACTOME_AUTODEGRADATION_OF_CDH1_BY_CDH1_APC_C		52	0.350081	2.99969	0	3.12402e-05	0.006	10129	tags=87%, list=52%, signal=178%
MMS_MOUSE_LYMPH_HIGH_4HRS_UP	MMS_MOUSE_LYMPH_HIGH_4HRS_UP		32	0.449379	2.99135	0	3.11142e-05	0.006	10205	tags=97%, list=52%, signal=202%
CROONQUIST_NRAS_SIGNALING_DN	CROONQUIST_NRAS_SIGNALING_DN		69	0.307645	2.98854	0	3.09893e-05	0.006	10478	tags=84%, list=53%, signal=180%
GINESTIER_BREAST_CANCER_20Q13_AMPLIFICATION_UP	GINESTIER_BREAST_CANCER_20Q13_AMPLIFICATION_UP		99	0.254298	2.98531	0	3.08653e-05	0.006	9900	tags=76%, list=50%, signal=152%
MONNIER_POSTRADIATION_TUMOR_ESCAPE_DN	MONNIER_POSTRADIATION_TUMOR_ESCAPE_DN		323	0.141001	2.97417	0	4.09688e-05	0.008	12405	tags=77%, list=63%, signal=206%
LE_EGR2_TARGETS_UP	LE_EGR2_TARGETS_UP		103	0.253009	2.97158	0	4.08063e-05	0.008	11254	tags=83%, list=57%, signal=192%
BURTON_ADIPOGENESIS_12	BURTON_ADIPOGENESIS_12		29	0.467798	2.97117	0	4.0645e-05	0.008	8426	tags=90%, list=43%, signal=157%
KANG_DOXORUBICIN_RESISTANCE_UP	KANG_DOXORUBICIN_RESISTANCE_UP		49	0.364854	2.96406	0	4.0485e-05	0.008	10478	tags=90%, list=53%, signal=192%
REACTOME_APC_C_CDH1_MEDIATED_DEGRADATION_OF_CDC20_AND_OTHER_APC_C_CDH1_TARGETED_PROTEINS_IN_LATE_MITOSIS_EARLY_G1	REACTOME_APC_C_CDH1_MEDIATED_DEGRADATION_OF_CDC20_AND_OTHER_APC_C_CDH1_TARGETED_PROTEINS_IN_LATE_MITOSIS_EARLY_G1		60	0.32595	2.96335	0	4.03262e-05	0.008	10302	tags=85%, list=52%, signal=178%
REACTOME_PEPTIDE_CHAIN_ELONGATION	REACTOME_PEPTIDE_CHAIN_ELONGATION		78	0.285176	2.9601	0	4.01687e-05	0.008	10023	tags=79%, list=51%, signal=162%
DITTMER_PTHLH_TARGETS_UP	DITTMER_PTHLH_TARGETS_UP		104	0.251556	2.95731	0	4.00124e-05	0.008	12259	tags=88%, list=62%, signal=232%
KRIVTSOV_SELF-RENEWAL_DOWN	KRIVTSOV_SELF-RENEWAL_DOWN		133	0.218035	2.95684	0	3.98573e-05	0.008	13602	tags=91%, list=69%, signal=294%
ZWANG_DOWN_BY_2ND_EGF_PULSE	ZWANG_DOWN_BY_2ND_EGF_PULSE		211	0.175562	2.95458	0	4.47674e-05	0.009	10820	tags=73%, list=55%, signal=160%
DOUGLAS_BMI1_TARGETS_DN	DOUGLAS_BMI1_TARGETS_DN		286	0.146687	2.95195	0	4.45952e-05	0.009	10336	tags=67%, list=53%, signal=140%
REACTOME_CYCLIN_E_ASSOCIATED_EVENTS_DURING_G1_S_TRANSITION_	REACTOME_CYCLIN_E_ASSOCIATED_EVENTS_DURING_G1_S_TRANSITION_		57	0.326824	2.94819	0	4.44243e-05	0.009	10129	tags=84%, list=52%, signal=174%
KEGG_BASAL_TRANSCRIPTION_FACTORS	KEGG_BASAL_TRANSCRIPTION_FACTORS		30	0.456607	2.94807	0	4.42548e-05	0.009	6097	tags=77%, list=31%, signal=111%
REACTOME_M_G1_TRANSITION	REACTOME_M_G1_TRANSITION		72	0.298339	2.94415	0	5.37529e-05	0.011	12699	tags=94%, list=65%, signal=267%
LI_WILMS_TUMOR_VS_FETAL_KIDNEY_1_DN	LI_WILMS_TUMOR_VS_FETAL_KIDNEY_1_DN		151	0.208195	2.94406	0	5.35493e-05	0.011	12839	tags=86%, list=65%, signal=247%
VANTVEER_BREAST_CANCER_METASTASIS_DN	VANTVEER_BREAST_CANCER_METASTASIS_DN		106	0.249535	2.94381	0	5.33472e-05	0.011	10494	tags=78%, list=53%, signal=167%
LIAO_METASTASIS	LIAO_METASTASIS		481	0.116234	2.93703	0	6.26433e-05	0.013	13603	tags=81%, list=69%, signal=256%
DEN_INTERACT_WITH_LCA5	DEN_INTERACT_WITH_LCA5		25	0.49195	2.92921	0	6.24087e-05	0.013	7626	tags=88%, list=39%, signal=144%
PID_AURORA_B_PATHWAY	PID_AURORA_B_PATHWAY		34	0.421336	2.92647	0	6.70724e-05	0.014	9637	tags=91%, list=49%, signal=179%
PELLICCIOTTA_HDAC_IN_ANTIGEN_PRESENTATION_DN	PELLICCIOTTA_HDAC_IN_ANTIGEN_PRESENTATION_DN		45	0.363204	2.92325	0	6.68231e-05	0.014	11203	tags=93%, list=57%, signal=217%
CAIRO_HEPATOBLASTOMA_UP	CAIRO_HEPATOBLASTOMA_UP		189	0.183649	2.92169	0	6.65756e-05	0.014	11277	tags=76%, list=57%, signal=176%
YAO_TEMPORAL_RESPONSE_TO_PROGESTERONE_CLUSTER_10	YAO_TEMPORAL_RESPONSE_TO_PROGESTERONE_CLUSTER_10		61	0.316113	2.90832	0	7.58968e-05	0.016	10543	tags=85%, list=54%, signal=184%
REACTOME_ACTIVATION_OF_NF_KAPPAB_IN_B_CELLS	REACTOME_ACTIVATION_OF_NF_KAPPAB_IN_B_CELLS		58	0.317524	2.90751	0	7.56178e-05	0.016	11718	tags=91%, list=60%, signal=226%
HEDENFALK_BREAST_CANCER_BRCA1_VS_BRCA2	HEDENFALK_BREAST_CANCER_BRCA1_VS_BRCA2		154	0.20228	2.90566	0	7.53408e-05	0.016	12116	tags=82%, list=62%, signal=212%
MSI2_BINDING_MS77	MSI2_BINDING_MS77		46	0.358711	2.90299	0	7.50659e-05	0.016	10040	tags=87%, list=51%, signal=178%
GARGALOVIC_RESPONSE_TO_OXIDIZED_PHOSPHOLIPIDS_MAGENTA_UP	GARGALOVIC_RESPONSE_TO_OXIDIZED_PHOSPHOLIPIDS_MAGENTA_UP		26	0.482911	2.89905	0	7.94574e-05	0.017	5630	tags=77%, list=29%, signal=108%
SONG_TARGETS_OF_IE86_CMV_PROTEIN	SONG_TARGETS_OF_IE86_CMV_PROTEIN		58	0.319261	2.8919	0	7.91695e-05	0.017	12699	tags=97%, list=65%, signal=273%
STEIN_ESRRA_TARGETS_UP	STEIN_ESRRA_TARGETS_UP		337	0.139597	2.88105	0	7.88837e-05	0.017	14193	tags=86%, list=72%, signal=306%
REACTOME_MITOTIC_G2_G2_M_PHASES	REACTOME_MITOTIC_G2_G2_M_PHASES		75	0.286873	2.87834	0	8.30794e-05	0.018	12706	tags=93%, list=65%, signal=264%
WANG_SMARCE1_TARGETS_DN	WANG_SMARCE1_TARGETS_DN		333	0.132371	2.87727	0	8.7409e-05	0.019	10174	tags=65%, list=52%, signal=132%
REACTOME_DOWNSTREAM_SIGNALING_EVENTS_OF_B_CELL_RECEPTOR_BCR	REACTOME_DOWNSTREAM_SIGNALING_EVENTS_OF_B_CELL_RECEPTOR_BCR		88	0.258517	2.8655	0	9.17152e-05	0.02	12119	tags=88%, list=62%, signal=228%
DAZARD_UV_RESPONSE_CLUSTER_G6	DAZARD_UV_RESPONSE_CLUSTER_G6		135	0.211495	2.85292	0	0.000104987	0.023	10849	tags=76%, list=55%, signal=169%
REACTOME_RNA_POL_II_PRE_TRANSCRIPTION_EVENTS	REACTOME_RNA_POL_II_PRE_TRANSCRIPTION_EVENTS		47	0.352976	2.84558	0	0.000104614	0.023	6867	tags=70%, list=35%, signal=108%
ODONNELL_TARGETS_OF_MYC_AND_TFRC_DN	ODONNELL_TARGETS_OF_MYC_AND_TFRC_DN		42	0.371541	2.84416	0	0.000108859	0.024	10478	tags=90%, list=53%, signal=194%
OSWALD_HEMATOPOIETIC_STEM_CELL_IN_COLLAGEN_GEL_DN	OSWALD_HEMATOPOIETIC_STEM_CELL_IN_COLLAGEN_GEL_DN		239	0.162157	2.84125	0	0.000112985	0.025	11963	tags=77%, list=61%, signal=195%
PECE_MAMMARY_STEM_CELL_DN	PECE_MAMMARY_STEM_CELL_DN		128	0.212089	2.82804	0	0.000121506	0.027	8282	tags=63%, list=42%, signal=109%
REACTOME_ACTIVATION_OF_ATR_IN_RESPONSE_TO_REPLICATION_STRESS	REACTOME_ACTIVATION_OF_ATR_IN_RESPONSE_TO_REPLICATION_STRESS		34	0.408224	2.82689	0	0.000121082	0.027	10471	tags=94%, list=53%, signal=201%
REACTOME_ASSEMBLY_OF_THE_PRE_REPLICATIVE_COMPLEX	REACTOME_ASSEMBLY_OF_THE_PRE_REPLICATIVE_COMPLEX		59	0.311329	2.82489	0	0.00012066	0.027	11203	tags=88%, list=57%, signal=205%
HOLLMANN_APOPTOSIS_VIA_CD40_DN	HOLLMANN_APOPTOSIS_VIA_CD40_DN		230	0.160705	2.82216	0.00188679	0.000124745	0.028	11813	tags=76%, list=60%, signal=189%
CYCLIND1_UP_LAMB	CYCLIND1_UP_LAMB		164	0.189374	2.82109	0	0.000124314	0.028	12826	tags=84%, list=65%, signal=241%
HAHTOLA_MYCOSIS_FUNGOIDES_SKIN_UP	HAHTOLA_MYCOSIS_FUNGOIDES_SKIN_UP		163	0.190192	2.81681	0	0.000128199	0.029	9420	tags=67%, list=48%, signal=128%
LASTCDS_CLIP_CHIP_MSI1	LASTCDS_CLIP_CHIP_MSI1		61	0.308068	2.81028	0	0.000145376	0.033	10057	tags=82%, list=51%, signal=168%
BASSO_B_LYMPHOCYTE_NETWORK	BASSO_B_LYMPHOCYTE_NETWORK		124	0.220165	2.80862	0	0.000144878	0.033	13430	tags=90%, list=68%, signal=284%
WHITFIELD_CELL_CYCLE_G1_S	WHITFIELD_CELL_CYCLE_G1_S		123	0.220233	2.80861	0	0.000144384	0.033	8946	tags=67%, list=46%, signal=123%
KRIEG_KDM3A_TARGETS_NOT_HYPOXIA	KRIEG_KDM3A_TARGETS_NOT_HYPOXIA		176	0.182917	2.80655	0	0.000143893	0.033	12274	tags=81%, list=63%, signal=214%
REACTOME_DEADENYLATION_DEPENDENT_MRNA_DECAY	REACTOME_DEADENYLATION_DEPENDENT_MRNA_DECAY		37	0.381527	2.80464	0	0.000147716	0.034	10028	tags=89%, list=51%, signal=182%
REACTOME_REGULATION_OF_ORNITHINE_DECARBOXYLASE_ODC	REACTOME_REGULATION_OF_ORNITHINE_DECARBOXYLASE_ODC		43	0.360059	2.80321	0	0.000147217	0.034	11203	tags=93%, list=57%, signal=216%
UDAYAKUMAR_MED1_TARGETS_UP	UDAYAKUMAR_MED1_TARGETS_UP		121	0.219764	2.80067	0	0.00015101	0.035	7714	tags=61%, list=39%, signal=100%
ZHOU_CELL_CYCLE_GENES_IN_IR_RESPONSE_6HR	ZHOU_CELL_CYCLE_GENES_IN_IR_RESPONSE_6HR		77	0.271428	2.79737	0	0.000150504	0.035	10494	tags=81%, list=53%, signal=172%
BAELDE_DIABETIC_NEPHROPATHY_DN	BAELDE_DIABETIC_NEPHROPATHY_DN		401	0.12378	2.79322	0	0.00015	0.035	10979	tags=68%, list=56%, signal=151%
IVANOVA_HEMATOPOIESIS_INTERMEDIATE_PROGENITOR	IVANOVA_HEMATOPOIESIS_INTERMEDIATE_PROGENITOR		135	0.212007	2.78473	0	0.000157948	0.037	12874	tags=87%, list=66%, signal=250%
PUJANA_BREAST_CANCER_WITH_BRCA1_MUTATED_UP	PUJANA_BREAST_CANCER_WITH_BRCA1_MUTATED_UP		51	0.333252	2.78469	0.00189753	0.000157423	0.037	10791	tags=88%, list=55%, signal=196%
MSI2_SHRNA_AML_UP	MSI2_SHRNA_AML_UP		54	0.317685	2.78094	0	0.000165367	0.039	7591	tags=70%, list=39%, signal=114%
SWEET_LUNG_CANCER_KRAS_UP	SWEET_LUNG_CANCER_KRAS_UP		437	0.116391	2.7761	0	0.000164822	0.039	13617	tags=81%, list=69%, signal=258%
REACTOME_SCFSKP2_MEDIATED_DEGRADATION_OF_P27_P21	REACTOME_SCFSKP2_MEDIATED_DEGRADATION_OF_P27_P21		48	0.338764	2.77374	0	0.000168476	0.04	10129	tags=85%, list=52%, signal=176%
AMUNDSON_RESPONSE_TO_ARSENITE	AMUNDSON_RESPONSE_TO_ARSENITE		196	0.171896	2.77334	0	0.000167924	0.04	14080	tags=89%, list=72%, signal=311%
KARLSSON_TGFB1_TARGETS_UP	KARLSSON_TGFB1_TARGETS_UP		108	0.226051	2.77212	0	0.000180092	0.043	9033	tags=69%, list=46%, signal=126%
SENESE_HDAC3_TARGETS_UP	SENESE_HDAC3_TARGETS_UP		442	0.117237	2.7718	0	0.000179506	0.043	11735	tags=71%, list=60%, signal=173%
LU_EZH2_TARGETS_DN	LU_EZH2_TARGETS_DN		345	0.131838	2.77046	0	0.000178923	0.043	14009	tags=84%, list=71%, signal=290%
REACTOME_UNFOLDED_PROTEIN_RESPONSE	REACTOME_UNFOLDED_PROTEIN_RESPONSE		68	0.277656	2.76713	0	0.00019065	0.046	12461	tags=91%, list=64%, signal=249%
LINDGREN_BLADDER_CANCER_WITH_LOH_IN_CHR9Q	LINDGREN_BLADDER_CANCER_WITH_LOH_IN_CHR9Q		97	0.237259	2.75827	0	0.000202489	0.049	10741	tags=78%, list=55%, signal=172%
IKEDA_MIR30_TARGETS_UP	IKEDA_MIR30_TARGETS_UP		109	0.225183	2.75589	0	0.000201838	0.049	10187	tags=74%, list=52%, signal=154%
REACTOME_FORMATION_OF_INCISION_COMPLEX_IN_GG_NER	REACTOME_FORMATION_OF_INCISION_COMPLEX_IN_GG_NER		19	0.532107	2.75463	0	0.00020517	0.05	7125	tags=89%, list=36%, signal=140%
REACTOME_CDT1_ASSOCIATION_WITH_THE_CDC6_ORC_ORIGIN_COMPLEX	REACTOME_CDT1_ASSOCIATION_WITH_THE_CDC6_ORC_ORIGIN_COMPLEX		50	0.331662	2.74744	0	0.000233062	0.057	11953	tags=94%, list=61%, signal=240%
PEART_HDAC_PROLIFERATION_CLUSTER_DN	PEART_HDAC_PROLIFERATION_CLUSTER_DN		68	0.279379	2.74601	0	0.00023232	0.057	11273	tags=85%, list=57%, signal=200%
REACTOME_AUTODEGRADATION_OF_THE_E3_UBIQUITIN_LIGASE_COP1	REACTOME_AUTODEGRADATION_OF_THE_E3_UBIQUITIN_LIGASE_COP1		43	0.34795	2.73763	0	0.000239681	0.059	8702	tags=79%, list=44%, signal=142%
IKEDA_MIR1_TARGETS_UP	IKEDA_MIR1_TARGETS_UP		52	0.312739	2.73618	0	0.000238923	0.059	8973	tags=77%, list=46%, signal=141%
REACTOME_P53_DEPENDENT_G1_DNA_DAMAGE_RESPONSE	REACTOME_P53_DEPENDENT_G1_DNA_DAMAGE_RESPONSE		48	0.338764	2.73543	0	0.000238169	0.059	10129	tags=85%, list=52%, signal=176%
REACTOME_PROTEIN_FOLDING	REACTOME_PROTEIN_FOLDING		49	0.32349	2.7339	0	0.00023742	0.059	13290	tags=100%, list=68%, signal=309%
GINESTIER_BREAST_CANCER_ZNF217_AMPLIFIED_DN	GINESTIER_BREAST_CANCER_ZNF217_AMPLIFIED_DN		293	0.137396	2.73185	0	0.00024071	0.06	14823	tags=89%, list=76%, signal=359%
REACTOME_DESTABILIZATION_OF_MRNA_BY_AUF1_HNRNP_D0	REACTOME_DESTABILIZATION_OF_MRNA_BY_AUF1_HNRNP_D0		45	0.34093	2.72546	0	0.000256211	0.064	11203	tags=91%, list=57%, signal=212%
ZHENG_BOUND_BY_FOXP3	ZHENG_BOUND_BY_FOXP3		450	0.11196	2.7223	0	0.000259411	0.065	10978	tags=67%, list=56%, signal=148%
REACTOME_RNA_POL_II_TRANSCRIPTION_PRE_INITIATION_AND_PROMOTER_OPENING	REACTOME_RNA_POL_II_TRANSCRIPTION_PRE_INITIATION_AND_PROMOTER_OPENING		36	0.375815	2.72027	0	0.000262617	0.066	6265	tags=69%, list=32%, signal=102%
REACTOME_P53_INDEPENDENT_G1_S_DNA_DAMAGE_CHECKPOINT	REACTOME_P53_INDEPENDENT_G1_S_DNA_DAMAGE_CHECKPOINT		44	0.348186	2.71929	0	0.000261804	0.066	10129	tags=86%, list=52%, signal=178%
MODY_HIPPOCAMPUS_PRENATAL	MODY_HIPPOCAMPUS_PRENATAL		40	0.360392	2.71082	0	0.000276969	0.07	9621	tags=85%, list=49%, signal=166%
REACTOME_SIGNALING_BY_WNT	REACTOME_SIGNALING_BY_WNT		58	0.300232	2.71027	0	0.00028011	0.071	11718	tags=90%, list=60%, signal=222%
ZHOU_TNF_SIGNALING_4HR	ZHOU_TNF_SIGNALING_4HR		51	0.326403	2.69606	0	0.000318522	0.081	9386	tags=80%, list=48%, signal=154%
ENK_UV_RESPONSE_KERATINOCYTE_UP	ENK_UV_RESPONSE_KERATINOCYTE_UP		488	0.105349	2.68816	0	0.000329424	0.084	14912	tags=86%, list=76%, signal=350%
REACTOME_TRANSCRIPTIONAL_REGULATION_OF_WHITE_ADIPOCYTE_DIFFERENTIATION	REACTOME_TRANSCRIPTIONAL_REGULATION_OF_WHITE_ADIPOCYTE_DIFFERENTIATION		68	0.276764	2.68627	0	0.000343907	0.086	10747	tags=82%, list=55%, signal=181%
JIANG_AGING_HYPOTHALAMUS_UP	JIANG_AGING_HYPOTHALAMUS_UP		44	0.337571	2.68472	0	0.000350518	0.087	7215	tags=70%, list=37%, signal=111%
ZHONG_RESPONSE_TO_AZACITIDINE_AND_TSA_DN	ZHONG_RESPONSE_TO_AZACITIDINE_AND_TSA_DN		60	0.296419	2.67411	0	0.000365169	0.091	12842	tags=95%, list=65%, signal=274%
KAMMINGA_EZH2_TARGETS	KAMMINGA_EZH2_TARGETS		39	0.367301	2.66242	0	0.000391006	0.096	9913	tags=87%, list=51%, signal=176%
PEART_HDAC_PROLIFERATION_CLUSTER_UP	PEART_HDAC_PROLIFERATION_CLUSTER_UP		53	0.308406	2.66207	0	0.000393573	0.097	12846	tags=96%, list=65%, signal=278%
FINETTI_BREAST_CANCERS_KINOME_GRAY	FINETTI_BREAST_CANCERS_KINOME_GRAY		15	0.566198	2.66064	0	0.000400042	0.099	8520	tags=100%, list=43%, signal=177%
LEE_METASTASIS_AND_RNA_PROCESSING_UP	LEE_METASTASIS_AND_RNA_PROCESSING_UP		17	0.536576	2.6606	0	0.000398844	0.099	5639	tags=82%, list=29%, signal=115%
ALCALA_APOPTOSIS	ALCALA_APOPTOSIS		84	0.245955	2.65989	0	0.000397654	0.099	12013	tags=86%, list=61%, signal=220%
PID_FOXO_PATHWAY	PID_FOXO_PATHWAY		48	0.318634	2.65913	0	0.00039647	0.099	8479	tags=75%, list=43%, signal=132%
SHAFFER_IRF4_TARGETS_IN_MYELOMA_VS_MATURE_B_LYMPHOCYTE	SHAFFER_IRF4_TARGETS_IN_MYELOMA_VS_MATURE_B_LYMPHOCYTE		95	0.230565	2.6575	0	0.000395294	0.099	7890	tags=63%, list=40%, signal=105%
BHATTACHARYA_EMBRYONIC_STEM_CELL	BHATTACHARYA_EMBRYONIC_STEM_CELL		79	0.258373	2.65627	0	0.000401559	0.101	13082	tags=92%, list=67%, signal=276%
KIM_WT1_TARGETS_12HR_DN	KIM_WT1_TARGETS_12HR_DN		189	0.168476	2.64947	0	0.000430609	0.106	12091	tags=78%, list=62%, signal=202%
ISHIDA_E2F_TARGETS	ISHIDA_E2F_TARGETS		48	0.325629	2.64824	0	0.00043701	0.108	12839	tags=98%, list=65%, signal=283%
REACTOME_VIF_MEDIATED_DEGRADATION_OF_APOBEC3G	REACTOME_VIF_MEDIATED_DEGRADATION_OF_APOBEC3G		43	0.34499	2.6471	0	0.000439466	0.109	10129	tags=86%, list=52%, signal=177%
BURTON_ADIPOGENESIS_5	BURTON_ADIPOGENESIS_5		106	0.216998	2.64409	0	0.000445703	0.111	14091	tags=93%, list=72%, signal=330%
UEDA_PERIFERAL_CLOCK	UEDA_PERIFERAL_CLOCK		154	0.180208	2.6429	0	0.000455607	0.114	9615	tags=67%, list=49%, signal=130%
CHIANG_LIVER_CANCER_SUBCLASS_PROLIFERATION_UP	CHIANG_LIVER_CANCER_SUBCLASS_PROLIFERATION_UP		162	0.182521	2.64267	0	0.000454283	0.114	10498	tags=72%, list=53%, signal=153%
BIOCARTA_HIVNEF_PATHWAY	BIOCARTA_HIVNEF_PATHWAY		56	0.305569	2.62842	0	0.000500768	0.124	9438	tags=79%, list=48%, signal=151%
REACTOME_RECRUITMENT_OF_MITOTIC_CENTROSOME_PROTEINS_AND_COMPLEXES	REACTOME_RECRUITMENT_OF_MITOTIC_CENTROSOME_PROTEINS_AND_COMPLEXES		61	0.292125	2.62659	0	0.000502933	0.125	12299	tags=92%, list=63%, signal=245%
GENTILE_UV_RESPONSE_CLUSTER_D2	GENTILE_UV_RESPONSE_CLUSTER_D2		39	0.352199	2.62634	0	0.000501484	0.125	7693	tags=74%, list=39%, signal=122%
REACTOME_ANTIGEN_PROCESSING_CROSS_PRESENTATION	REACTOME_ANTIGEN_PROCESSING_CROSS_PRESENTATION		64	0.278759	2.62049	0	0.000529345	0.133	9264	tags=75%, list=47%, signal=142%
REACTOME_METABOLISM_OF_NON_CODING_RNA	REACTOME_METABOLISM_OF_NON_CODING_RNA		46	0.326752	2.61978	0	0.000527829	0.133	12372	tags=96%, list=63%, signal=258%
YAGI_AML_WITH_INV_16_TRANSLOCATION	YAGI_AML_WITH_INV_16_TRANSLOCATION		382	0.114179	2.61381	0	0.00056252	0.139	11569	tags=70%, list=59%, signal=168%
REACTOME_TCA_CYCLE_AND_RESPIRATORY_ELECTRON_TRANSPORT	REACTOME_TCA_CYCLE_AND_RESPIRATORY_ELECTRON_TRANSPORT		108	0.208452	2.61307	0	0.000568198	0.141	10830	tags=76%, list=55%, signal=169%
BOUDOUKHA_BOUND_BY_IGF2BP2	BOUDOUKHA_BOUND_BY_IGF2BP2		98	0.220584	2.61139	0	0.000570363	0.141	10109	tags=73%, list=52%, signal=151%
FARMER_BREAST_CANCER_CLUSTER_2	FARMER_BREAST_CANCER_CLUSTER_2		32	0.387991	2.61054	0	0.000568748	0.141	9568	tags=88%, list=49%, signal=170%
HOLLEMAN_ASPARAGINASE_RESISTANCE_ALL_DN	HOLLEMAN_ASPARAGINASE_RESISTANCE_ALL_DN		22	0.465384	2.60489	0	0.000592258	0.148	10500	tags=100%, list=54%, signal=215%
REACTOME_REGULATION_OF_APOPTOSIS	REACTOME_REGULATION_OF_APOPTOSIS		52	0.311518	2.60304	0	0.000601298	0.151	10129	tags=83%, list=52%, signal=170%
DAIRKEE_TERT_TARGETS_UP	DAIRKEE_TERT_TARGETS_UP		318	0.126119	2.59952	0	0.000621077	0.155	15768	tags=93%, list=80%, signal=465%
BYSTRYKH_HEMATOPOIESIS_STEM_CELL_AND_BRAIN_QTL_TRANS	BYSTRYKH_HEMATOPOIESIS_STEM_CELL_AND_BRAIN_QTL_TRANS		163	0.173595	2.58881	0	0.000655448	0.164	11308	tags=75%, list=58%, signal=175%
REACTOME_LOSS_OF_NLP_FROM_MITOTIC_CENTROSOMES	REACTOME_LOSS_OF_NLP_FROM_MITOTIC_CENTROSOMES		54	0.299936	2.58761	0	0.000653617	0.164	12299	tags=93%, list=63%, signal=247%
FORTSCHEGGER_PHF8_TARGETS_UP	FORTSCHEGGER_PHF8_TARGETS_UP		237	0.14395	2.58352	0	0.000705478	0.175	10042	tags=65%, list=51%, signal=132%
SOMERVAILLE.HIGHLSCVSHSC_UP	SOMERVAILLE.HIGHLSCVSHSC_UP		67	0.266897	2.57315	0	0.000749908	0.185	10888	tags=82%, list=55%, signal=184%
BIOCARTA_FAS_PATHWAY	BIOCARTA_FAS_PATHWAY		30	0.395529	2.57233	0.00203252	0.00074783	0.185	9256	tags=87%, list=47%, signal=164%
STEARMAN_LUNG_CANCER_EARLY_VS_LATE_UP	STEARMAN_LUNG_CANCER_EARLY_VS_LATE_UP		117	0.203258	2.57177	0	0.000752932	0.187	10458	tags=74%, list=53%, signal=156%
MCBRYAN_PUBERTAL_BREAST_5_6WK_DN	MCBRYAN_PUBERTAL_BREAST_5_6WK_DN		128	0.195559	2.56992	0	0.000761406	0.19	9984	tags=70%, list=51%, signal=142%
PID_BARD1_PATHWAY	PID_BARD1_PATHWAY		27	0.4142	2.56961	0.00201207	0.000759314	0.19	9325	tags=89%, list=48%, signal=169%
KEGG_RNA_DEGRADATION	KEGG_RNA_DEGRADATION		51	0.313813	2.56886	0	0.000764288	0.192	11941	tags=92%, list=61%, signal=235%
FLECHNER_PBL_KIDNEY_TRANSPLANT_REJECTED_VS_OK_UP	FLECHNER_PBL_KIDNEY_TRANSPLANT_REJECTED_VS_OK_UP		61	0.283774	2.56406	0	0.000779672	0.196	11819	tags=89%, list=60%, signal=222%
MENSE_HYPOXIA_UP	MENSE_HYPOXIA_UP		90	0.230398	2.56387	0	0.000781015	0.196	10979	tags=79%, list=56%, signal=178%
BYSTRYKH_HEMATOPOIESIS_STEM_CELL_AND_BRAIN_QTL_CIS	BYSTRYKH_HEMATOPOIESIS_STEM_CELL_AND_BRAIN_QTL_CIS		55	0.28891	2.56355	0	0.000782345	0.197	10044	tags=80%, list=51%, signal=163%
PID_ATR_PATHWAY	PID_ATR_PATHWAY		38	0.350729	2.55908	0	0.000804548	0.202	10171	tags=87%, list=52%, signal=180%
ZHAN_V2_LATE_DIFFERENTIATION_GENES	ZHAN_V2_LATE_DIFFERENTIATION_GENES		42	0.325483	2.55727	0	0.000805837	0.203	9511	tags=81%, list=48%, signal=157%
WATANABE_RECTAL_CANCER_RADIOTHERAPY_RESPONSIVE_UP	WATANABE_RECTAL_CANCER_RADIOTHERAPY_RESPONSIVE_UP		97	0.220645	2.55606	0	0.000810724	0.205	11470	tags=80%, list=58%, signal=193%
MORI_EMU_MYC_LYMPHOMA_BY_ONSET_TIME_UP	MORI_EMU_MYC_LYMPHOMA_BY_ONSET_TIME_UP		94	0.219812	2.55172	0	0.000846611	0.214	13868	tags=93%, list=71%, signal=314%
KEGG_HUNTINGTONS_DISEASE	KEGG_HUNTINGTONS_DISEASE		161	0.172872	2.54621	0	0.000868276	0.218	10651	tags=71%, list=54%, signal=155%
GINESTIER_BREAST_CANCER_ZNF217_AMPLIFIED_UP	GINESTIER_BREAST_CANCER_ZNF217_AMPLIFIED_UP		66	0.26836	2.54484	0	0.000883039	0.222	8130	tags=68%, list=41%, signal=116%
SENESE_HDAC3_TARGETS_DN	SENESE_HDAC3_TARGETS_DN		469	0.101819	2.5426	0	0.000890883	0.224	16040	tags=92%, list=82%, signal=490%
RHODES_CANCER_META_SIGNATURE	RHODES_CANCER_META_SIGNATURE		58	0.282804	2.53386	0	0.000946393	0.234	10029	tags=79%, list=51%, signal=162%
TIEN_INTESTINE_PROBIOTICS_6HR_DN	TIEN_INTESTINE_PROBIOTICS_6HR_DN		151	0.177758	2.53184	0	0.000950538	0.235	12522	tags=81%, list=64%, signal=223%
WAKASUGI_HAVE_ZNF143_BINDING_SITES	WAKASUGI_HAVE_ZNF143_BINDING_SITES		55	0.287077	2.53147	0	0.000948023	0.235	11507	tags=87%, list=59%, signal=210%
LU_AGING_BRAIN_DN	LU_AGING_BRAIN_DN		140	0.181642	2.52927	0	0.000962499	0.239	10897	tags=74%, list=56%, signal=164%
YAO_TEMPORAL_RESPONSE_TO_PROGESTERONE_CLUSTER_14	YAO_TEMPORAL_RESPONSE_TO_PROGESTERONE_CLUSTER_14		128	0.191349	2.52865	0	0.000963334	0.24	14052	tags=91%, list=72%, signal=317%
REACTOME_PPARA_ACTIVATES_GENE_EXPRESSION	REACTOME_PPARA_ACTIVATES_GENE_EXPRESSION		95	0.222794	2.52831	0.00204082	0.000964235	0.241	10727	tags=77%, list=55%, signal=169%
REACTOME_CDK_MEDIATED_PHOSPHORYLATION_AND_REMOVAL_OF_CDC6	REACTOME_CDK_MEDIATED_PHOSPHORYLATION_AND_REMOVAL_OF_CDC6		41	0.338134	2.52531	0.0019802	0.000971715	0.243	10129	tags=85%, list=52%, signal=176%
REACTOME_FATTY_ACID_TRIACYLGLYCEROL_AND_KETONE_BODY_METABOLISM	REACTOME_FATTY_ACID_TRIACYLGLYCEROL_AND_KETONE_BODY_METABOLISM		156	0.176305	2.51925	0	0.00100572	0.252	12542	tags=81%, list=64%, signal=224%
PID_ATM_PATHWAY	PID_ATM_PATHWAY		33	0.370806	2.51807	0	0.00100647	0.252	10574	tags=91%, list=54%, signal=197%
SMITH_LIVER_CANCER	SMITH_LIVER_CANCER		43	0.327061	2.51607	0	0.00101372	0.253	9111	tags=79%, list=46%, signal=147%
PID_FAS_PATHWAY	PID_FAS_PATHWAY		38	0.339047	2.51355	0	0.00102117	0.255	9367	tags=82%, list=48%, signal=156%
NAKAMURA_TUMOR_ZONE_PERIPHERAL_VS_CENTRAL_UP	NAKAMURA_TUMOR_ZONE_PERIPHERAL_VS_CENTRAL_UP		245	0.140217	2.51319	0	0.0010284	0.256	12740	tags=79%, list=65%, signal=222%
REACTOME_SCF_BETA_TRCP_MEDIATED_DEGRADATION_OF_EMI1	REACTOME_SCF_BETA_TRCP_MEDIATED_DEGRADATION_OF_EMI1		45	0.314625	2.51237	0	0.00103893	0.259	11718	tags=91%, list=60%, signal=226%
IVANOVA_HEMATOPOIESIS_MATURE_CELL	IVANOVA_HEMATOPOIESIS_MATURE_CELL		252	0.135144	2.50971	0.00206612	0.00105595	0.263	15291	tags=91%, list=78%, signal=408%
BROWNE_HCMV_INFECTION_12HR_UP	BROWNE_HCMV_INFECTION_12HR_UP		99	0.212773	2.50789	0	0.0010763	0.27	11900	tags=82%, list=61%, signal=207%
REACTOME_ANTIVIRAL_MECHANISM_BY_IFN_STIMULATED_GENES	REACTOME_ANTIVIRAL_MECHANISM_BY_IFN_STIMULATED_GENES		61	0.273846	2.5071	0	0.00108334	0.271	9118	tags=74%, list=46%, signal=137%
SMIRNOV_RESPONSE_TO_IR_2HR_UP	SMIRNOV_RESPONSE_TO_IR_2HR_UP		46	0.313009	2.50627	0	0.00108394	0.272	7522	tags=70%, list=38%, signal=113%
GROSS_HYPOXIA_VIA_HIF1A_UP	GROSS_HYPOXIA_VIA_HIF1A_UP		72	0.249787	2.5052	0	0.00108765	0.273	12013	tags=86%, list=61%, signal=221%
MOOTHA_VOXPHOS	MOOTHA_VOXPHOS		75	0.249355	2.50514	0.00383877	0.00108489	0.273	10823	tags=80%, list=55%, signal=178%
KEGG_NUCLEOTIDE_EXCISION_REPAIR	KEGG_NUCLEOTIDE_EXCISION_REPAIR		40	0.33653	2.50355	0	0.00109529	0.277	11560	tags=93%, list=59%, signal=225%
STEIN_ESRRA_TARGETS_DN	STEIN_ESRRA_TARGETS_DN		96	0.218872	2.50284	0	0.0011021	0.278	12282	tags=84%, list=63%, signal=224%
PELLICCIOTTA_HDAC_IN_ANTIGEN_PRESENTATION_UP	PELLICCIOTTA_HDAC_IN_ANTIGEN_PRESENTATION_UP		58	0.277693	2.4997	0	0.00111874	0.284	10129	tags=79%, list=52%, signal=163%
KEGG_PROTEIN_EXPORT	KEGG_PROTEIN_EXPORT		22	0.441817	2.49554	0	0.00114484	0.291	10070	tags=95%, list=51%, signal=196%
SESTO_RESPONSE_TO_UV_C2	SESTO_RESPONSE_TO_UV_C2		52	0.28962	2.49445	0	0.00115163	0.291	7916	tags=69%, list=40%, signal=116%
REACTOME_APOPTOSIS	REACTOME_APOPTOSIS		132	0.187602	2.48904	0	0.00117747	0.299	11803	tags=79%, list=60%, signal=196%
TIEN_INTESTINE_PROBIOTICS_2HR_DN	TIEN_INTESTINE_PROBIOTICS_2HR_DN		78	0.239444	2.48859	0	0.00118096	0.3	11420	tags=82%, list=58%, signal=196%
CHEMNITZ_RESPONSE_TO_PROSTAGLANDIN_E2_UP	CHEMNITZ_RESPONSE_TO_PROSTAGLANDIN_E2_UP		124	0.19151	2.48841	0	0.00117802	0.3	13514	tags=88%, list=69%, signal=281%
IKEDA_MIR133_TARGETS_UP	IKEDA_MIR133_TARGETS_UP		43	0.314995	2.48821	0	0.0011751	0.3	11629	tags=91%, list=59%, signal=222%
ENK_UV_RESPONSE_EPIDERMIS_DN	ENK_UV_RESPONSE_EPIDERMIS_DN		459	0.0992124	2.4875	0	0.00117847	0.3	12676	tags=74%, list=65%, signal=205%
BILD_CTNNB1_ONCOGENIC_SIGNATURE	BILD_CTNNB1_ONCOGENIC_SIGNATURE		75	0.248629	2.48531	0	0.00120079	0.305	9529	tags=73%, list=49%, signal=142%
LIN_MELANOMA_COPY_NUMBER_DN	LIN_MELANOMA_COPY_NUMBER_DN		37	0.345767	2.48236	0	0.0012167	0.309	8607	tags=78%, list=44%, signal=139%
BILD_MYC_ONCOGENIC_SIGNATURE	BILD_MYC_ONCOGENIC_SIGNATURE		177	0.157823	2.47765	0	0.00126728	0.321	14890	tags=92%, list=76%, signal=376%
MULLIGHAN_NPM1_SIGNATURE_3_UP	MULLIGHAN_NPM1_SIGNATURE_3_UP		282	0.125883	2.47761	0	0.00126417	0.321	9185	tags=59%, list=47%, signal=110%
SCHAEFFER_PROSTATE_DEVELOPMENT_AND_CANCER_BOX4_DN	SCHAEFFER_PROSTATE_DEVELOPMENT_AND_CANCER_BOX4_DN		31	0.363414	2.47721	0	0.00126415	0.322	9970	tags=87%, list=51%, signal=177%
WANG_RESPONSE_TO_GSK3_INHIBITOR_SB216763_UP	WANG_RESPONSE_TO_GSK3_INHIBITOR_SB216763_UP		306	0.120359	2.47554	0.00197628	0.00127659	0.326	13257	tags=79%, list=68%, signal=241%
RAF1_UP_CREIGHTON	RAF1_UP_CREIGHTON		429	0.104135	2.47051	0	0.00131711	0.338	16251	tags=93%, list=83%, signal=529%
RUTELLA_RESPONSE_TO_HGF_UP	RUTELLA_RESPONSE_TO_HGF_UP		364	0.112059	2.46998	0	0.00131704	0.339	8461	tags=54%, list=43%, signal=93%
DER_IFN_BETA_RESPONSE_UP	DER_IFN_BETA_RESPONSE_UP		93	0.216078	2.46952	0	0.00131385	0.339	11815	tags=82%, list=60%, signal=204%
PEDERSEN_METASTASIS_BY_ERBB2_ISOFORM_7	PEDERSEN_METASTASIS_BY_ERBB2_ISOFORM_7		349	0.112715	2.46942	0	0.00131385	0.339	13345	tags=79%, list=68%, signal=243%
MAHADEVAN_RESPONSE_TO_MP470_DN	MAHADEVAN_RESPONSE_TO_MP470_DN		18	0.476188	2.46807	0	0.00132001	0.341	8106	tags=89%, list=41%, signal=151%
DUTERTRE_ESTRADIOL_RESPONSE_6HR_UP	DUTERTRE_ESTRADIOL_RESPONSE_6HR_UP		209	0.149037	2.45894	0	0.00143383	0.365	13818	tags=85%, list=70%, signal=285%
KAYO_AGING_MUSCLE_DN	KAYO_AGING_MUSCLE_DN		111	0.198697	2.4551	0	0.00147345	0.375	11679	tags=79%, list=60%, signal=195%
SASAKI_ADULT_T_CELL_LEUKEMIA	SASAKI_ADULT_T_CELL_LEUKEMIA		162	0.169156	2.44762	0	0.00154054	0.392	11606	tags=76%, list=59%, signal=184%
RAMASWAMY_METASTASIS_UP	RAMASWAMY_METASTASIS_UP		63	0.265878	2.44755	0	0.00153686	0.392	13487	tags=95%, list=69%, signal=304%
GROSS_HYPOXIA_VIA_ELK3_UP	GROSS_HYPOXIA_VIA_ELK3_UP		187	0.156189	2.44724	0.00391389	0.0015332	0.392	12179	tags=78%, list=62%, signal=202%
FAELT_B_CLL_WITH_VH3_21_DN	FAELT_B_CLL_WITH_VH3_21_DN		47	0.292599	2.44439	0	0.00156268	0.398	10554	tags=83%, list=54%, signal=179%
WANG_CISPLATIN_RESPONSE_AND_XPC_DN	WANG_CISPLATIN_RESPONSE_AND_XPC_DN		204	0.15106	2.43702	0	0.00161073	0.409	9859	tags=65%, list=50%, signal=130%
WONG_PROTEASOME_GENE_MODULE	WONG_PROTEASOME_GENE_MODULE		49	0.288991	2.43695	0	0.00160692	0.409	11162	tags=86%, list=57%, signal=198%
MAYBURD_RESPONSE_TO_L663536_DN	MAYBURD_RESPONSE_TO_L663536_DN		51	0.290706	2.43599	0	0.00162128	0.413	12778	tags=94%, list=65%, signal=269%
BENPORATH_MYC_TARGETS_WITH_EBOX	BENPORATH_MYC_TARGETS_WITH_EBOX		212	0.147844	2.43594	0	0.00161746	0.413	13420	tags=83%, list=68%, signal=260%
LASTOWSKA_NEUROBLASTOMA_COPY_NUMBER_UP	LASTOWSKA_NEUROBLASTOMA_COPY_NUMBER_UP		154	0.168879	2.4348	0	0.00161966	0.414	9963	tags=68%, list=51%, signal=136%
REACTOME_CROSS_PRESENTATION_OF_SOLUBLE_EXOGENOUS_ANTIGENS_ENDOSOMES	REACTOME_CROSS_PRESENTATION_OF_SOLUBLE_EXOGENOUS_ANTIGENS_ENDOSOMES		42	0.310655	2.43453	0	0.00161587	0.414	11203	tags=88%, list=57%, signal=205%
REACTOME_PREFOLDIN_MEDIATED_TRANSFER_OF_SUBSTRATE_TO_CCT_TRIC	REACTOME_PREFOLDIN_MEDIATED_TRANSFER_OF_SUBSTRATE_TO_CCT_TRIC		26	0.397013	2.43403	0	0.00161511	0.414	11087	tags=96%, list=57%, signal=221%
HSCVSGMP_DN	HSCVSGMP_DN		174	0.156942	2.43301	0.00194932	0.00161734	0.415	14878	tags=91%, list=76%, signal=375%
DAZARD_RESPONSE_TO_UV_SCC_DN	DAZARD_RESPONSE_TO_UV_SCC_DN		110	0.201713	2.43153	0	0.00162258	0.418	7480	tags=58%, list=38%, signal=93%
BLALOCK_ALZHEIMERS_DISEASE_INCIPIENT_UP	BLALOCK_ALZHEIMERS_DISEASE_INCIPIENT_UP		362	0.110293	2.43096	0	0.00161881	0.418	14191	tags=83%, list=72%, signal=295%
REACTOME_NEP_NS2_INTERACTS_WITH_THE_CELLULAR_EXPORT_MACHINERY	REACTOME_NEP_NS2_INTERACTS_WITH_THE_CELLULAR_EXPORT_MACHINERY		26	0.396735	2.42945	0	0.00163293	0.422	9583	tags=88%, list=49%, signal=173%
RUIZ_TNC_TARGETS_DN	RUIZ_TNC_TARGETS_DN		132	0.179311	2.42536	0	0.00168223	0.429	10478	tags=71%, list=53%, signal=152%
SCHLOSSER_MYC_TARGETS_AND_SERUM_RESPONSE_DN	SCHLOSSER_MYC_TARGETS_AND_SERUM_RESPONSE_DN		44	0.308815	2.42519	0.00193798	0.00167835	0.429	7778	tags=70%, list=40%, signal=116%
TIEN_INTESTINE_PROBIOTICS_6HR_UP	TIEN_INTESTINE_PROBIOTICS_6HR_UP		54	0.283484	2.42443	0	0.00168346	0.43	10804	tags=83%, list=55%, signal=185%
PID_MYC_ACTIV_PATHWAY	PID_MYC_ACTIV_PATHWAY		73	0.239879	2.42284	0	0.00170619	0.434	9825	tags=74%, list=50%, signal=148%
UDAYAKUMAR_MED1_TARGETS_DN	UDAYAKUMAR_MED1_TARGETS_DN		213	0.14257	2.42061	0	0.00172559	0.436	11972	tags=75%, list=61%, signal=191%
MULLIGHAN_MLL_SIGNATURE_2_UP	MULLIGHAN_MLL_SIGNATURE_2_UP		360	0.109594	2.41949	0	0.00173927	0.439	14949	tags=87%, list=76%, signal=358%
PID_ERBB1_DOWNSTREAM_PATHWAY	PID_ERBB1_DOWNSTREAM_PATHWAY		103	0.202651	2.41331	0	0.00182028	0.457	12237	tags=83%, list=62%, signal=218%
DANG_REGULATED_BY_MYC_UP	DANG_REGULATED_BY_MYC_UP		68	0.248822	2.4117	0	0.00183365	0.459	13602	tags=94%, list=69%, signal=306%
REACTOME_TRANSPORT_OF_RIBONUCLEOPROTEINS_INTO_THE_HOST_NUCLEUS	REACTOME_TRANSPORT_OF_RIBONUCLEOPROTEINS_INTO_THE_HOST_NUCLEUS		26	0.396735	2.4114	0	0.00183234	0.46	9583	tags=88%, list=49%, signal=173%
DAVICIONI_MOLECULAR_ARMS_VS_ERMS_UP	DAVICIONI_MOLECULAR_ARMS_VS_ERMS_UP		303	0.121661	2.41102	0	0.00183108	0.461	11961	tags=73%, list=61%, signal=184%
PROVENZANI_METASTASIS_UP	PROVENZANI_METASTASIS_UP		166	0.161865	2.41088	0	0.00182985	0.462	9971	tags=67%, list=51%, signal=135%
FULCHER_INFLAMMATORY_RESPONSE_LECTIN_VS_LPS_DN	FULCHER_INFLAMMATORY_RESPONSE_LECTIN_VS_LPS_DN		402	0.106927	2.4077	0	0.00186306	0.471	10440	tags=64%, list=53%, signal=133%
YAMASHITA_LIVER_CANCER_WITH_EPCAM_UP	YAMASHITA_LIVER_CANCER_WITH_EPCAM_UP		46	0.301201	2.40391	0	0.00191927	0.484	6900	tags=65%, list=35%, signal=100%
GRUETZMANN_PANCREATIC_CANCER_UP	GRUETZMANN_PANCREATIC_CANCER_UP		325	0.115811	2.40138	0	0.00195252	0.492	13704	tags=81%, list=70%, signal=265%
KIM_MYC_AMPLIFICATION_TARGETS_UP	KIM_MYC_AMPLIFICATION_TARGETS_UP		178	0.150383	2.39849	0	0.00199137	0.502	10855	tags=70%, list=55%, signal=156%
ZAMORA_NOS2_TARGETS_UP	ZAMORA_NOS2_TARGETS_UP		59	0.263744	2.39513	0.00204082	0.00202983	0.508	10471	tags=80%, list=53%, signal=170%
KOYAMA_SEMA3B_TARGETS_DN	KOYAMA_SEMA3B_TARGETS_DN		352	0.112727	2.39142	0	0.00206261	0.516	10314	tags=64%, list=53%, signal=132%
SHEPARD_CRUSH_AND_BURN_MUTANT_UP	SHEPARD_CRUSH_AND_BURN_MUTANT_UP		171	0.155551	2.3897	0	0.00208089	0.52	10629	tags=70%, list=54%, signal=151%
REACTOME_MRNA_SPLICING_MINOR_PATHWAY	REACTOME_MRNA_SPLICING_MINOR_PATHWAY		37	0.33396	2.38924	0	0.00208477	0.52	11490	tags=92%, list=59%, signal=221%
MENSSEN_MYC_TARGETS	MENSSEN_MYC_TARGETS		48	0.292845	2.3862	0	0.00212583	0.53	8575	tags=73%, list=44%, signal=129%
EGUCHI_CELL_CYCLE_RB1_TARGETS	EGUCHI_CELL_CYCLE_RB1_TARGETS		22	0.421358	2.38571	0	0.00212687	0.53	10471	tags=95%, list=53%, signal=204%
KEGG_PROTEASOME	KEGG_PROTEASOME		38	0.33393	2.38383	0	0.00214771	0.535	10500	tags=87%, list=54%, signal=186%
RODWELL_AGING_KIDNEY_NO_BLOOD_DN	RODWELL_AGING_KIDNEY_NO_BLOOD_DN		133	0.177855	2.38324	0	0.00214847	0.536	8631	tags=62%, list=44%, signal=109%
SCHLOSSER_MYC_TARGETS_AND_SERUM_RESPONSE_UP	SCHLOSSER_MYC_TARGETS_AND_SERUM_RESPONSE_UP		43	0.303144	2.37984	0	0.00220286	0.543	10492	tags=84%, list=53%, signal=180%
VANHARANTA_UTERINE_FIBROID_WITH_7Q_DELETION_UP	VANHARANTA_UTERINE_FIBROID_WITH_7Q_DELETION_UP		64	0.251184	2.37675	0	0.00225716	0.554	11643	tags=84%, list=59%, signal=207%
TAKAO_RESPONSE_TO_UVB_RADIATION_DN	TAKAO_RESPONSE_TO_UVB_RADIATION_DN		90	0.213087	2.37578	0	0.00227437	0.557	10445	tags=74%, list=53%, signal=158%
FLECHNER_PBL_KIDNEY_TRANSPLANT_REJECTED_VS_OK_DN	FLECHNER_PBL_KIDNEY_TRANSPLANT_REJECTED_VS_OK_DN		48	0.29159	2.37381	0.00604839	0.00230827	0.561	9826	tags=79%, list=50%, signal=158%
RUTELLA_RESPONSE_TO_HGF_VS_CSF2RB_AND_IL4_DN	RUTELLA_RESPONSE_TO_HGF_VS_CSF2RB_AND_IL4_DN		227	0.133898	2.37027	0	0.00235895	0.572	11406	tags=71%, list=58%, signal=168%
KARLSSON_TGFB1_TARGETS_DN	KARLSSON_TGFB1_TARGETS_DN		188	0.14757	2.37011	0	0.00235384	0.572	12892	tags=80%, list=66%, signal=232%
RASHI_RESPONSE_TO_IONIZING_RADIATION_5	RASHI_RESPONSE_TO_IONIZING_RADIATION_5		135	0.173673	2.36973	0	0.00235697	0.572	13185	tags=84%, list=67%, signal=256%
CAFFAREL_RESPONSE_TO_THC_24HR_5_DN	CAFFAREL_RESPONSE_TO_THC_24HR_5_DN		53	0.274223	2.36967	0	0.00235188	0.572	10553	tags=81%, list=54%, signal=175%
BOYAULT_LIVER_CANCER_SUBCLASS_G123_UP	BOYAULT_LIVER_CANCER_SUBCLASS_G123_UP		42	0.306372	2.36817	0	0.00236051	0.574	9418	tags=79%, list=48%, signal=151%
TURASHVILI_BREAST_DUCTAL_CARCINOMA_VS_LOBULAR_NORMAL_UP	TURASHVILI_BREAST_DUCTAL_CARCINOMA_VS_LOBULAR_NORMAL_UP		69	0.241616	2.36659	0	0.00237205	0.576	9494	tags=72%, list=48%, signal=140%
P53_SIGNALING	P53_SIGNALING		76	0.230974	2.36283	0	0.00245195	0.589	9685	tags=72%, list=49%, signal=142%
BROWNE_HCMV_INFECTION_20HR_UP	BROWNE_HCMV_INFECTION_20HR_UP		218	0.136477	2.36191	0	0.00246864	0.592	12653	tags=78%, list=64%, signal=217%
VERNELL_RETINOBLASTOMA_PATHWAY_UP	VERNELL_RETINOBLASTOMA_PATHWAY_UP		66	0.243812	2.35799	0	0.00254847	0.604	10394	tags=77%, list=53%, signal=164%
KYNG_RESPONSE_TO_H2O2	KYNG_RESPONSE_TO_H2O2		66	0.249927	2.35777	0	0.00255387	0.605	11761	tags=85%, list=60%, signal=211%
GROSS_HYPOXIA_VIA_ELK3_AND_HIF1A_DN	GROSS_HYPOXIA_VIA_ELK3_AND_HIF1A_DN		94	0.205306	2.35566	0.00200401	0.00260037	0.615	12690	tags=85%, list=65%, signal=240%
WAKABAYASHI_ADIPOGENESIS_PPARG_RXRA_BOUND_36HR	WAKABAYASHI_ADIPOGENESIS_PPARG_RXRA_BOUND_36HR		126	0.17923	2.34907	0.00195695	0.00272579	0.629	13480	tags=87%, list=69%, signal=275%
REACTOME_SIGNALING_BY_THE_B_CELL_RECEPTOR_BCR	REACTOME_SIGNALING_BY_THE_B_CELL_RECEPTOR_BCR		117	0.186891	2.34892	0	0.00272276	0.63	12119	tags=80%, list=62%, signal=209%
BOYAULT_LIVER_CANCER_SUBCLASS_G1_UP	BOYAULT_LIVER_CANCER_SUBCLASS_G1_UP		94	0.204767	2.347	0.00198413	0.00273866	0.632	11448	tags=79%, list=58%, signal=188%
REACTOME_TRANSPORT_OF_MATURE_MRNA_DERIVED_FROM_AN_INTRONLESS_TRANSCRIPT	REACTOME_TRANSPORT_OF_MATURE_MRNA_DERIVED_FROM_AN_INTRONLESS_TRANSCRIPT		31	0.365506	2.34463	0	0.00277326	0.636	10562	tags=90%, list=54%, signal=195%
IIZUKA_LIVER_CANCER_PROGRESSION_G1_G2_DN	IIZUKA_LIVER_CANCER_PROGRESSION_G1_G2_DN		23	0.416291	2.344	0	0.00278905	0.637	8050	tags=83%, list=41%, signal=140%
REACTOME_ACTIVATION_OF_THE_MRNA_UPON_BINDING_OF_THE_CAP_BINDING_COMPLEX_AND_EIFS_AND_SUBSEQUENT_BINDING_TO_43S	REACTOME_ACTIVATION_OF_THE_MRNA_UPON_BINDING_OF_THE_CAP_BINDING_COMPLEX_AND_EIFS_AND_SUBSEQUENT_BINDING_TO_43S		52	0.278287	2.34194	0	0.0028048	0.638	10402	tags=81%, list=53%, signal=171%
REACTOME_INTERACTIONS_OF_VPR_WITH_HOST_CELLULAR_PROTEINS	REACTOME_INTERACTIONS_OF_VPR_WITH_HOST_CELLULAR_PROTEINS		31	0.364588	2.34067	0.00193424	0.00282602	0.642	9947	tags=87%, list=51%, signal=176%
LINDGREN_BLADDER_CANCER_CLUSTER_1_DN	LINDGREN_BLADDER_CANCER_CLUSTER_1_DN		343	0.109625	2.33991	0	0.00282818	0.643	12760	tags=76%, list=65%, signal=213%
LANDIS_ERBB2_BREAST_TUMORS_65_UP	LANDIS_ERBB2_BREAST_TUMORS_65_UP		20	0.432783	2.33911	0	0.00283819	0.645	10157	tags=95%, list=52%, signal=197%
LAIHO_COLORECTAL_CANCER_SERRATED_UP	LAIHO_COLORECTAL_CANCER_SERRATED_UP		103	0.196209	2.3345	0.00201207	0.00290683	0.656	9124	tags=66%, list=46%, signal=123%
FERRANDO_T_ALL_WITH_MLL_ENL_FUSION_DN	FERRANDO_T_ALL_WITH_MLL_ENL_FUSION_DN		81	0.218997	2.33334	0	0.00294089	0.664	12193	tags=84%, list=62%, signal=221%
CHIARADONNA_NEOPLASTIC_TRANSFORMATION_KRAS_UP	CHIARADONNA_NEOPLASTIC_TRANSFORMATION_KRAS_UP		116	0.182179	2.32679	0	0.00304938	0.676	9640	tags=67%, list=49%, signal=131%
RUTELLA_RESPONSE_TO_CSF2RB_AND_IL4_UP	RUTELLA_RESPONSE_TO_CSF2RB_AND_IL4_UP		303	0.115102	2.32521	0	0.00308562	0.68	12282	tags=74%, list=63%, signal=195%
MULLIGHAN_NPM1_MUTATED_SIGNATURE_2_UP	MULLIGHAN_NPM1_MUTATED_SIGNATURE_2_UP		117	0.188143	2.32357	0	0.00311864	0.684	12430	tags=82%, list=63%, signal=223%
HU_ANGIOGENESIS_DN	HU_ANGIOGENESIS_DN		35	0.325985	2.31539	0	0.00329472	0.708	9312	tags=80%, list=47%, signal=152%
REACTOME_NUCLEOTIDE_EXCISION_REPAIR	REACTOME_NUCLEOTIDE_EXCISION_REPAIR		45	0.292158	2.31434	0	0.00330373	0.709	13030	tags=96%, list=66%, signal=284%
BROWNE_HCMV_INFECTION_16HR_UP	BROWNE_HCMV_INFECTION_16HR_UP		211	0.13605	2.31089	0	0.00338085	0.714	7030	tags=49%, list=36%, signal=76%
GUO_HEX_TARGETS_UP	GUO_HEX_TARGETS_UP		74	0.225687	2.30935	0.00204918	0.00340017	0.716	9111	tags=69%, list=46%, signal=128%
CHNG_MULTIPLE_MYELOMA_HYPERPLOID_DN	CHNG_MULTIPLE_MYELOMA_HYPERPLOID_DN		26	0.379742	2.30848	0	0.00340354	0.716	9916	tags=88%, list=51%, signal=179%
BOYLAN_MULTIPLE_MYELOMA_C_D_UP	BOYLAN_MULTIPLE_MYELOMA_C_D_UP		126	0.176317	2.30284	0	0.00355054	0.738	11045	tags=74%, list=56%, signal=168%
PECE_MAMMARY_STEM_CELL_UP	PECE_MAMMARY_STEM_CELL_UP		121	0.178622	2.30254	0	0.0035485	0.739	11922	tags=79%, list=61%, signal=199%
REACTOME_RESPIRATORY_ELECTRON_TRANSPORT	REACTOME_RESPIRATORY_ELECTRON_TRANSPORT		59	0.254359	2.30248	0	0.00354129	0.739	10322	tags=78%, list=53%, signal=164%
CUI_GLUCOSE_DEPRIVATION	CUI_GLUCOSE_DEPRIVATION		53	0.26822	2.30193	0	0.00354979	0.742	9930	tags=77%, list=51%, signal=156%
CAFFAREL_RESPONSE_TO_THC_UP	CAFFAREL_RESPONSE_TO_THC_UP		31	0.347999	2.30122	0	0.00355551	0.744	7107	tags=71%, list=36%, signal=111%
LUI_THYROID_CANCER_PAX8_PPARG_DN	LUI_THYROID_CANCER_PAX8_PPARG_DN		41	0.299751	2.29967	0.00207469	0.00358739	0.751	10402	tags=83%, list=53%, signal=176%
ACEVEDO_NORMAL_TISSUE_ADJACENT_TO_LIVER_TUMOR_DN	ACEVEDO_NORMAL_TISSUE_ADJACENT_TO_LIVER_TUMOR_DN		308	0.114166	2.29811	0.00200401	0.00361886	0.753	15187	tags=89%, list=77%, signal=386%
BASAKI_YBX1_TARGETS_DN	BASAKI_YBX1_TARGETS_DN		348	0.108672	2.2978	0.00192678	0.00361675	0.755	8900	tags=56%, list=45%, signal=101%
EHLERS_ANEUPLOIDY_UP	EHLERS_ANEUPLOIDY_UP		38	0.312179	2.29773	0.002079	0.00360949	0.755	10926	tags=87%, list=56%, signal=196%
BIOCARTA_G2_PATHWAY	BIOCARTA_G2_PATHWAY		24	0.38671	2.29549	0.00194932	0.0036457	0.76	9590	tags=88%, list=49%, signal=171%
FINETTI_BREAST_CANCER_KINOME_RED	FINETTI_BREAST_CANCER_KINOME_RED		16	0.474123	2.29316	0	0.00368964	0.766	7873	tags=88%, list=40%, signal=146%
JIANG_HYPOXIA_CANCER	JIANG_HYPOXIA_CANCER		73	0.232384	2.29009	0.00198413	0.00378443	0.772	12122	tags=85%, list=62%, signal=221%
REACTOME_METABOLISM_OF_LIPIDS_AND_LIPOPROTEINS	REACTOME_METABOLISM_OF_LIPIDS_AND_LIPOPROTEINS		436	0.094489	2.28776	0	0.00386106	0.782	11013	tags=65%, list=56%, signal=146%
FALVELLA_SMOKERS_WITH_LUNG_CANCER	FALVELLA_SMOKERS_WITH_LUNG_CANCER		71	0.231145	2.28542	0	0.00391936	0.791	7364	tags=61%, list=38%, signal=97%
SINGH_NFE2L2_TARGETS	SINGH_NFE2L2_TARGETS		15	0.486506	2.28521	0.00204918	0.00391412	0.791	6158	tags=80%, list=31%, signal=116%
REACTOME_SIGNALLING_BY_NGF	REACTOME_SIGNALLING_BY_NGF		203	0.140082	2.28275	0	0.00395749	0.796	13615	tags=83%, list=69%, signal=269%
MULLIGHAN_MLL_SIGNATURE_1_UP	MULLIGHAN_MLL_SIGNATURE_1_UP		321	0.108039	2.27778	0.00390625	0.00410938	0.808	14908	tags=87%, list=76%, signal=355%
DAIRKEE_CANCER_PRONE_RESPONSE_BPA_E2	DAIRKEE_CANCER_PRONE_RESPONSE_BPA_E2		103	0.192304	2.27585	0	0.00414431	0.813	12820	tags=84%, list=65%, signal=242%
PID_E2F_PATHWAY	PID_E2F_PATHWAY		70	0.232552	2.27484	0	0.00416144	0.815	10029	tags=74%, list=51%, signal=151%
YAMAZAKI_TCEB3_TARGETS_DN	YAMAZAKI_TCEB3_TARGETS_DN		192	0.144068	2.27454	0	0.00416332	0.815	9975	tags=65%, list=51%, signal=131%
LEE_RECENT_THYMIC_EMIGRANT	LEE_RECENT_THYMIC_EMIGRANT		188	0.142674	2.27226	0	0.00421328	0.82	11839	tags=74%, list=60%, signal=186%
AMUNDSON_GAMMA_RADIATION_RESPONSE	AMUNDSON_GAMMA_RADIATION_RESPONSE		40	0.29627	2.27223	0	0.00420503	0.82	12839	tags=95%, list=65%, signal=274%
PID_P53_REGULATION_PATHWAY	PID_P53_REGULATION_PATHWAY		54	0.264457	2.26998	0.00596422	0.00423944	0.822	8996	tags=72%, list=46%, signal=133%
GUTIERREZ_MULTIPLE_MYELOMA_UP	GUTIERREZ_MULTIPLE_MYELOMA_UP		27	0.370132	2.26854	0	0.00428866	0.824	8735	tags=81%, list=45%, signal=147%
PUIFFE_INVASION_INHIBITED_BY_ASCITES_UP	PUIFFE_INVASION_INHIBITED_BY_ASCITES_UP		77	0.220149	2.26827	0	0.00428524	0.825	12006	tags=83%, list=61%, signal=213%
HOFMANN_CELL_LYMPHOMA_UP	HOFMANN_CELL_LYMPHOMA_UP		43	0.290172	2.26611	0	0.00435678	0.829	10746	tags=84%, list=55%, signal=185%
OUILLETTE_CLL_13Q14_DELETION_UP	OUILLETTE_CLL_13Q14_DELETION_UP		68	0.233647	2.26409	0	0.00440776	0.833	11013	tags=79%, list=56%, signal=180%
PHONG_TNF_RESPONSE_VIA_P38_COMPLETE	PHONG_TNF_RESPONSE_VIA_P38_COMPLETE		211	0.136307	2.26389	0.0021645	0.00440412	0.833	12698	tags=78%, list=65%, signal=219%
BAKKER_FOXO3_TARGETS_UP	BAKKER_FOXO3_TARGETS_UP		55	0.262354	2.26061	0.00200803	0.00449191	0.838	11634	tags=85%, list=59%, signal=209%
BROWNE_HCMV_INFECTION_8HR_UP	BROWNE_HCMV_INFECTION_8HR_UP		97	0.200986	2.25907	0	0.00452764	0.841	5178	tags=46%, list=26%, signal=63%
JOHANSSON_GLIOMAGENESIS_BY_PDGFB_UP	JOHANSSON_GLIOMAGENESIS_BY_PDGFB_UP		57	0.25342	2.25811	0	0.00455318	0.842	12598	tags=89%, list=64%, signal=249%
NICK_RESPONSE_TO_PROC_TREATMENT_DN	NICK_RESPONSE_TO_PROC_TREATMENT_DN		25	0.379439	2.25573	0.00203252	0.00461054	0.845	9831	tags=88%, list=50%, signal=176%
WANG.LGMPHOXA9-MEIS1VSHSC_DN	WANG.LGMPHOXA9-MEIS1VSHSC_DN		192	0.14122	2.25561	0	0.00460662	0.845	11870	tags=74%, list=60%, signal=187%
LEE_EARLY_T_LYMPHOCYTE_UP	LEE_EARLY_T_LYMPHOCYTE_UP		97	0.193389	2.24944	0.00389105	0.00479122	0.858	11193	tags=76%, list=57%, signal=177%
BENPORATH_NOS_TARGETS	BENPORATH_NOS_TARGETS		159	0.149793	2.24858	0.00202429	0.00480431	0.858	11523	tags=74%, list=59%, signal=177%
KEGG_OXIDATIVE_PHOSPHORYLATION	KEGG_OXIDATIVE_PHOSPHORYLATION		102	0.190611	2.24346	0	0.00494657	0.869	10322	tags=72%, list=53%, signal=150%
BIOCARTA_ATRBRCA_PATHWAY	BIOCARTA_ATRBRCA_PATHWAY		19	0.432586	2.24144	0	0.00500271	0.874	9076	tags=89%, list=46%, signal=166%
GRAHAM_CML_QUIESCENT_VS_CML_DIVIDING_UP	GRAHAM_CML_QUIESCENT_VS_CML_DIVIDING_UP		17	0.448221	2.24089	0	0.00501275	0.875	6217	tags=76%, list=32%, signal=112%
LINDGREN_BLADDER_CANCER_CLUSTER_1_UP	LINDGREN_BLADDER_CANCER_CLUSTER_1_UP		100	0.188532	2.23703	0	0.00512866	0.879	11428	tags=77%, list=58%, signal=183%
WELCSH_BRCA1_TARGETS_DN	WELCSH_BRCA1_TARGETS_DN		135	0.165744	2.2338	0	0.00523556	0.881	14357	tags=90%, list=73%, signal=332%
GRAESSMANN_APOPTOSIS_BY_SERUM_DEPRIVATION_UP	GRAESSMANN_APOPTOSIS_BY_SERUM_DEPRIVATION_UP		484	0.0882791	2.23352	0	0.00524267	0.883	13797	tags=79%, list=70%, signal=259%
BRUECKNER_TARGETS_OF_MIRLET7A3_UP	BRUECKNER_TARGETS_OF_MIRLET7A3_UP		101	0.190449	2.2322	0.00403226	0.00527848	0.885	9104	tags=65%, list=46%, signal=121%
KEGG_PYRIMIDINE_METABOLISM	KEGG_PYRIMIDINE_METABOLISM		88	0.204052	2.23163	0.00630252	0.00528534	0.885	12514	tags=84%, list=64%, signal=231%
AGUIRRE_PANCREATIC_CANCER_COPY_NUMBER_UP	AGUIRRE_PANCREATIC_CANCER_COPY_NUMBER_UP		265	0.120751	2.22985	0	0.00533784	0.887	13508	tags=81%, list=69%, signal=256%
REACTOME_FORMATION_OF_THE_TERNARY_COMPLEX_AND_SUBSEQUENTLY_THE_43S_COMPLEX	REACTOME_FORMATION_OF_THE_TERNARY_COMPLEX_AND_SUBSEQUENTLY_THE_43S_COMPLEX		46	0.276105	2.22983	0	0.00532784	0.887	10804	tags=83%, list=55%, signal=183%
ZHAN_MULTIPLE_MYELOMA_SUBGROUPS	ZHAN_MULTIPLE_MYELOMA_SUBGROUPS		29	0.350943	2.22957	0.00200401	0.00532731	0.887	10039	tags=86%, list=51%, signal=176%
REACTOME_RESPIRATORY_ELECTRON_TRANSPORT_ATP_SYNTHESIS_BY_CHEMIOSMOTIC_COUPLING_AND_HEAT_PRODUCTION_BY_UNCOUPLING_PROTEINS_	REACTOME_RESPIRATORY_ELECTRON_TRANSPORT_ATP_SYNTHESIS_BY_CHEMIOSMOTIC_COUPLING_AND_HEAT_PRODUCTION_BY_UNCOUPLING_PROTEINS_		73	0.222836	2.22183	0	0.00559208	0.899	10427	tags=75%, list=53%, signal=160%
BROWNE_HCMV_INFECTION_10HR_UP	BROWNE_HCMV_INFECTION_10HR_UP		87	0.202975	2.22138	0.00206186	0.00560311	0.899	10469	tags=74%, list=53%, signal=157%
STEIN_ESRRA_TARGETS_RESPONSIVE_TO_ESTROGEN_DN	STEIN_ESRRA_TARGETS_RESPONSIVE_TO_ESTROGEN_DN		37	0.304753	2.21608	0	0.0057934	0.907	10471	tags=84%, list=53%, signal=179%
KIM_GERMINAL_CENTER_T_HELPER_UP	KIM_GERMINAL_CENTER_T_HELPER_UP		61	0.240002	2.21352	0	0.00588746	0.912	8815	tags=69%, list=45%, signal=125%
COLLER_MYC_TARGETS_UP	COLLER_MYC_TARGETS_UP		23	0.377516	2.21047	0.0020284	0.00597405	0.919	8810	tags=83%, list=45%, signal=150%
TOOKER_GEMCITABINE_RESISTANCE_DN	TOOKER_GEMCITABINE_RESISTANCE_DN		117	0.179816	2.20882	0.00414938	0.00600575	0.92	12257	tags=80%, list=62%, signal=213%
KEGG_PARKINSONS_DISEASE	KEGG_PARKINSONS_DISEASE		104	0.18646	2.20588	0	0.00611758	0.924	10322	tags=71%, list=53%, signal=149%
THUM_SYSTOLIC_HEART_FAILURE_UP	THUM_SYSTOLIC_HEART_FAILURE_UP		362	0.101752	2.20554	0	0.00611566	0.925	7417	tags=48%, list=38%, signal=75%
REACTOME_MITOCHONDRIAL_TRNA_AMINOACYLATION	REACTOME_MITOCHONDRIAL_TRNA_AMINOACYLATION		20	0.407925	2.20517	0	0.00612569	0.926	8682	tags=85%, list=44%, signal=152%
MATTIOLI_MGUS_VS_PCL	MATTIOLI_MGUS_VS_PCL		90	0.20035	2.2046	0	0.00613802	0.927	12002	tags=81%, list=61%, signal=208%
BILANGES_SERUM_AND_RAPAMYCIN_SENSITIVE_GENES	BILANGES_SERUM_AND_RAPAMYCIN_SENSITIVE_GENES		61	0.236811	2.20283	0.00204499	0.0062044	0.928	12416	tags=87%, list=63%, signal=236%
DMAP_NEUT.VS.HSC_UP	DMAP_NEUT.VS.HSC_UP		223	0.12724	2.20051	0.0019685	0.0062635	0.929	8354	tags=55%, list=43%, signal=95%
5UTR_CLIP_CHIP_MSI1	5UTR_CLIP_CHIP_MSI1		37	0.306966	2.19916	0.00198413	0.00629656	0.93	10958	tags=86%, list=56%, signal=195%
CHANDRAN_METASTASIS_TOP50_UP	CHANDRAN_METASTASIS_TOP50_UP		32	0.322876	2.19804	0.00194175	0.0063388	0.933	9004	tags=78%, list=46%, signal=144%
KEGG_OOCYTE_MEIOSIS	KEGG_OOCYTE_MEIOSIS		101	0.184662	2.1977	0	0.00634599	0.933	13297	tags=86%, list=68%, signal=266%
PARK_HSC_AND_MULTIPOTENT_PROGENITORS	PARK_HSC_AND_MULTIPOTENT_PROGENITORS		47	0.267081	2.19526	0.0019802	0.00643429	0.936	9801	tags=77%, list=50%, signal=153%
BARRIER_COLON_CANCER_RECURRENCE_UP	BARRIER_COLON_CANCER_RECURRENCE_UP		39	0.300477	2.19313	0	0.00649699	0.939	12228	tags=92%, list=62%, signal=244%
MOLENAAR_TARGETS_OF_CCND1_AND_CDK4_DN	MOLENAAR_TARGETS_OF_CCND1_AND_CDK4_DN		50	0.265551	2.19069	0	0.00661721	0.941	8145	tags=68%, list=42%, signal=116%
PID_ECADHERIN_NASCENT_AJ_PATHWAY	PID_ECADHERIN_NASCENT_AJ_PATHWAY		37	0.297842	2.18988	0	0.00665851	0.942	10076	tags=81%, list=51%, signal=166%
GAZDA_DIAMOND_BLACKFAN_ANEMIA_PROGENITOR_DN	GAZDA_DIAMOND_BLACKFAN_ANEMIA_PROGENITOR_DN		62	0.2403	2.18864	0.00398406	0.00671138	0.942	12073	tags=85%, list=62%, signal=221%
BROWNE_HCMV_INFECTION_18HR_UP	BROWNE_HCMV_INFECTION_18HR_UP		157	0.151015	2.18794	0	0.00672464	0.942	10308	tags=68%, list=53%, signal=141%
GROSS_HYPOXIA_VIA_ELK3_AND_HIF1A_UP	GROSS_HYPOXIA_VIA_ELK3_AND_HIF1A_UP		131	0.164968	2.18772	0	0.00671256	0.942	12362	tags=79%, list=63%, signal=213%
REACTOME_PHOSPHORYLATION_OF_THE_APC_C	REACTOME_PHOSPHORYLATION_OF_THE_APC_C		17	0.442401	2.18368	0	0.00685384	0.946	9794	tags=94%, list=50%, signal=188%
SPIRA_SMOKERS_LUNG_CANCER_UP	SPIRA_SMOKERS_LUNG_CANCER_UP		34	0.322759	2.1829	0.00604839	0.00688756	0.948	7528	tags=71%, list=38%, signal=114%
NIKOLSKY_BREAST_CANCER_8Q12_Q22_AMPLICON	NIKOLSKY_BREAST_CANCER_8Q12_Q22_AMPLICON		115	0.174738	2.18286	0.00394477	0.00687985	0.949	10241	tags=70%, list=52%, signal=145%
CHIBA_RESPONSE_TO_TSA	CHIBA_RESPONSE_TO_TSA		45	0.275302	2.1806	0.0038835	0.00700425	0.951	13360	tags=96%, list=68%, signal=299%
MULLIGHAN_NPM1_MUTATED_SIGNATURE_1_UP	MULLIGHAN_NPM1_MUTATED_SIGNATURE_1_UP		221	0.127437	2.17622	0	0.00718113	0.955	11378	tags=71%, list=58%, signal=166%
KEGG_PANCREATIC_CANCER	KEGG_PANCREATIC_CANCER		67	0.229014	2.17459	0.00206186	0.00724338	0.955	13679	tags=93%, list=70%, signal=304%
SHAFFER_IRF4_TARGETS_IN_ACTIVATED_B_LYMPHOCYTE	SHAFFER_IRF4_TARGETS_IN_ACTIVATED_B_LYMPHOCYTE		73	0.216051	2.17171	0	0.00739866	0.959	8678	tags=66%, list=44%, signal=117%
KYNG_WERNER_SYNDROM_AND_NORMAL_AGING_UP	KYNG_WERNER_SYNDROM_AND_NORMAL_AGING_UP		85	0.199529	2.16777	0	0.00755801	0.96	10183	tags=72%, list=52%, signal=149%
REACTOME_TRANSCRIPTION_COUPLED_NER_TC_NER	REACTOME_TRANSCRIPTION_COUPLED_NER_TC_NER		40	0.286516	2.16674	0.00189394	0.00758311	0.96	13030	tags=95%, list=66%, signal=282%
REACTOME_ANTIGEN_PRESENTATION_FOLDING_ASSEMBLY_AND_PEPTIDE_LOADING_OF_CLASS_I_MHC	REACTOME_ANTIGEN_PRESENTATION_FOLDING_ASSEMBLY_AND_PEPTIDE_LOADING_OF_CLASS_I_MHC		19	0.409785	2.16632	0.00403226	0.00759243	0.961	9523	tags=89%, list=49%, signal=174%
BAE_BRCA1_TARGETS_UP	BAE_BRCA1_TARGETS_UP		69	0.219851	2.16618	0.00392157	0.00758583	0.961	10204	tags=74%, list=52%, signal=153%
MCBRYAN_PUBERTAL_BREAST_4_5WK_DN	MCBRYAN_PUBERTAL_BREAST_4_5WK_DN		172	0.142757	2.16557	0.00191939	0.00760379	0.961	12624	tags=78%, list=64%, signal=218%
PID_PLK1_PATHWAY	PID_PLK1_PATHWAY		41	0.287089	2.16273	0.00193424	0.00772294	0.966	13043	tags=95%, list=66%, signal=283%
BHATI_G2M_ARREST_BY_2METHOXYESTRADIOL_UP	BHATI_G2M_ARREST_BY_2METHOXYESTRADIOL_UP		104	0.182403	2.16177	0	0.00776072	0.968	8137	tags=60%, list=41%, signal=101%
UEDA_CENTRAL_CLOCK	UEDA_CENTRAL_CLOCK		84	0.202887	2.15928	0.00412371	0.00786573	0.968	9584	tags=69%, list=49%, signal=134%
SCHUHMACHER_MYC_TARGETS_UP	SCHUHMACHER_MYC_TARGETS_UP		72	0.222331	2.15899	0.006	0.00786106	0.969	10642	tags=76%, list=54%, signal=166%
DACOSTA_UV_RESPONSE_VIA_ERCC3_COMMON_UP	DACOSTA_UV_RESPONSE_VIA_ERCC3_COMMON_UP		66	0.230594	2.15551	0	0.00803004	0.97	13923	tags=94%, list=71%, signal=322%
LI_WILMS_TUMOR_ANAPLASTIC_UP	LI_WILMS_TUMOR_ANAPLASTIC_UP		18	0.426464	2.1551	0.00196078	0.00805188	0.971	10171	tags=94%, list=52%, signal=196%
BIOCARTA_TNFR1_PATHWAY	BIOCARTA_TNFR1_PATHWAY		28	0.350186	2.15433	0.00424628	0.00808013	0.971	9256	tags=82%, list=47%, signal=155%
PID_ERBB1_INTERNALIZATION_PATHWAY	PID_ERBB1_INTERNALIZATION_PATHWAY		40	0.285538	2.15	0.00419287	0.00826799	0.974	12068	tags=90%, list=61%, signal=233%
BIOCARTA_PROTEASOME_PATHWAY	BIOCARTA_PROTEASOME_PATHWAY		25	0.365501	2.1494	0	0.00828045	0.974	11674	tags=96%, list=59%, signal=237%
MORI_MATURE_B_LYMPHOCYTE_DN	MORI_MATURE_B_LYMPHOCYTE_DN		71	0.218017	2.14385	0.00408163	0.00859154	0.98	11490	tags=80%, list=59%, signal=193%
GAVIN_FOXP3_TARGETS_CLUSTER_T7	GAVIN_FOXP3_TARGETS_CLUSTER_T7		91	0.189544	2.14379	0.0019802	0.00858339	0.98	12254	tags=81%, list=62%, signal=216%
REACTOME_RIG_I_MDA5_MEDIATED_INDUCTION_OF_IFN_ALPHA_BETA_PATHWAYS	REACTOME_RIG_I_MDA5_MEDIATED_INDUCTION_OF_IFN_ALPHA_BETA_PATHWAYS		56	0.24006	2.14318	0.00199601	0.00861279	0.981	10019	tags=75%, list=51%, signal=153%
BYSTRYKH_HEMATOPOIESIS_STEM_CELL_QTL_CIS	BYSTRYKH_HEMATOPOIESIS_STEM_CELL_QTL_CIS		109	0.176858	2.1413	0.00413223	0.00870342	0.982	10950	tags=73%, list=56%, signal=165%
NIKOLSKY_BREAST_CANCER_7Q21_Q22_AMPLICON	NIKOLSKY_BREAST_CANCER_7Q21_Q22_AMPLICON		59	0.236522	2.1377	0.00205761	0.00890091	0.985	9008	tags=69%, list=46%, signal=128%
SANSOM_APC_MYC_TARGETS	SANSOM_APC_MYC_TARGETS		186	0.135978	2.13698	0.00591716	0.00892735	0.985	12337	tags=76%, list=63%, signal=204%
CROMER_METASTASIS_UP	CROMER_METASTASIS_UP		73	0.217304	2.13678	0.00199203	0.00892305	0.985	12148	tags=84%, list=62%, signal=219%
REACTOME_DIABETES_PATHWAYS	REACTOME_DIABETES_PATHWAYS		111	0.177116	2.13536	0.00190476	0.00901901	0.986	12984	tags=84%, list=66%, signal=246%
REACTOME_GLOBAL_GENOMIC_NER_GG_NER	REACTOME_GLOBAL_GENOMIC_NER_GG_NER		30	0.337371	2.13469	0	0.00904723	0.986	7125	tags=70%, list=36%, signal=110%
KYNG_WERNER_SYNDROM_AND_NORMAL_AGING_DN	KYNG_WERNER_SYNDROM_AND_NORMAL_AGING_DN		204	0.130024	2.12996	0.00201613	0.00929971	0.986	15558	tags=92%, list=79%, signal=440%
REACTOME_REGULATION_OF_HYPOXIA_INDUCIBLE_FACTOR_HIF_BY_OXYGEN	REACTOME_REGULATION_OF_HYPOXIA_INDUCIBLE_FACTOR_HIF_BY_OXYGEN		20	0.401038	2.12851	0.00194175	0.00935591	0.986	8817	tags=85%, list=45%, signal=154%
REACTOME_PERK_REGULATED_GENE_EXPRESSION	REACTOME_PERK_REGULATED_GENE_EXPRESSION		23	0.37772	2.12846	0.00202429	0.00934445	0.986	8806	tags=83%, list=45%, signal=150%
SLEBOS_HEAD_AND_NECK_CANCER_WITH_HPV_UP	SLEBOS_HEAD_AND_NECK_CANCER_WITH_HPV_UP		75	0.20621	2.12821	0.00603622	0.0093461	0.986	9050	tags=67%, list=46%, signal=123%
TARTE_PLASMA_CELL_VS_B_LYMPHOCYTE_UP	TARTE_PLASMA_CELL_VS_B_LYMPHOCYTE_UP		70	0.213304	2.12769	0.00204499	0.00935854	0.987	11807	tags=81%, list=60%, signal=204%
HU_GENOTOXIC_DAMAGE_4HR	HU_GENOTOXIC_DAMAGE_4HR		35	0.303027	2.12522	0.00205339	0.00950068	0.989	12565	tags=94%, list=64%, signal=262%
CREIGHTON_ENDOCRINE_THERAPY_RESISTANCE_1	CREIGHTON_ENDOCRINE_THERAPY_RESISTANCE_1		468	0.0851669	2.12397	0	0.0095324	0.989	15391	tags=87%, list=78%, signal=393%
COLLIS_PRKDC_SUBSTRATES	COLLIS_PRKDC_SUBSTRATES		19	0.408805	2.12256	0.00824742	0.0096194	0.989	10575	tags=95%, list=54%, signal=205%
WEI_MIR34A_TARGETS	WEI_MIR34A_TARGETS		133	0.160361	2.12182	0.00202429	0.00965282	0.989	10890	tags=71%, list=55%, signal=159%
FRASOR_RESPONSE_TO_SERM_OR_FULVESTRANT_DN	FRASOR_RESPONSE_TO_SERM_OR_FULVESTRANT_DN		50	0.253446	2.12135	0	0.00966657	0.989	12699	tags=90%, list=65%, signal=254%
BIOCARTA_CASPASE_PATHWAY	BIOCARTA_CASPASE_PATHWAY		23	0.357362	2.12062	0.00395257	0.0097104	0.99	9205	tags=83%, list=47%, signal=155%
WATANABE_RECTAL_CANCER_RADIOTHERAPY_RESPONSIVE_DN	WATANABE_RECTAL_CANCER_RADIOTHERAPY_RESPONSIVE_DN		87	0.190245	2.12009	0.00590551	0.00971755	0.99	12071	tags=80%, list=62%, signal=208%
REACTOME_TRNA_AMINOACYLATION	REACTOME_TRNA_AMINOACYLATION		40	0.28869	2.1177	0	0.0098896	0.992	13478	tags=98%, list=69%, signal=311%
PID_RB_1PATHWAY	PID_RB_1PATHWAY		59	0.230569	2.11555	0.00421053	0.0100073	0.992	12783	tags=88%, list=65%, signal=252%
IVANOVSKA_MIR106B_TARGETS	IVANOVSKA_MIR106B_TARGETS		81	0.199492	2.11515	0	0.010014	0.992	15239	tags=98%, list=78%, signal=435%
IWANAGA_CARCINOGENESIS_BY_KRAS_PTEN_DN	IWANAGA_CARCINOGENESIS_BY_KRAS_PTEN_DN		300	0.103936	2.11493	0.00203252	0.0100103	0.992	13362	tags=78%, list=68%, signal=242%
THILLAINADESAN_ZNF217_TARGETS_UP	THILLAINADESAN_ZNF217_TARGETS_UP		40	0.284305	2.11323	0.00191205	0.0100911	0.992	11111	tags=85%, list=57%, signal=196%
REACTOME_DEADENYLATION_OF_MRNA	REACTOME_DEADENYLATION_OF_MRNA		15	0.448939	2.11311	0.00203666	0.0100787	0.992	9511	tags=93%, list=48%, signal=181%
LAIHO_COLORECTAL_CANCER_SERRATED_DN	LAIHO_COLORECTAL_CANCER_SERRATED_DN		71	0.213102	2.11303	0.00408163	0.0100685	0.992	12968	tags=87%, list=66%, signal=257%
KYNG_DNA_DAMAGE_DN	KYNG_DNA_DAMAGE_DN		180	0.134365	2.11183	0	0.0101296	0.992	6980	tags=49%, list=36%, signal=75%
KEGG_AMINOACYL_TRNA_BIOSYNTHESIS	KEGG_AMINOACYL_TRNA_BIOSYNTHESIS		40	0.28869	2.11117	0.00198807	0.0101533	0.993	13478	tags=98%, list=69%, signal=311%
WANG_METASTASIS_OF_BREAST_CANCER_ESR1_UP	WANG_METASTASIS_OF_BREAST_CANCER_ESR1_UP		19	0.407194	2.10976	0.00374532	0.0102225	0.993	8541	tags=84%, list=44%, signal=149%
MILI_PSEUDOPODIA_CHEMOTAXIS_UP	MILI_PSEUDOPODIA_CHEMOTAXIS_UP		63	0.223503	2.10943	0.002079	0.0102287	0.993	12447	tags=86%, list=63%, signal=234%
REACTOME_FORMATION_OF_RNA_POL_II_ELONGATION_COMPLEX_	REACTOME_FORMATION_OF_RNA_POL_II_ELONGATION_COMPLEX_		32	0.318498	2.10933	0	0.0102182	0.993	9703	tags=81%, list=49%, signal=160%
PASQUALUCCI_LYMPHOMA_BY_GC_STAGE_UP	PASQUALUCCI_LYMPHOMA_BY_GC_STAGE_UP		252	0.114968	2.1089	0.00596422	0.010216	0.993	12022	tags=73%, list=61%, signal=185%
DORSAM_HOXA9_TARGETS_UP	DORSAM_HOXA9_TARGETS_UP		33	0.313796	2.1084	0.00619835	0.0102348	0.993	8123	tags=73%, list=41%, signal=124%
TANG_SENESCENCE_TP53_TARGETS_DN	TANG_SENESCENCE_TP53_TARGETS_DN		52	0.244832	2.10829	0.00613497	0.010237	0.993	10302	tags=77%, list=52%, signal=162%
CHANG_CORE_SERUM_RESPONSE_DN	CHANG_CORE_SERUM_RESPONSE_DN		181	0.133084	2.10441	0.00604839	0.0104873	0.994	12698	tags=78%, list=65%, signal=219%
ZHU_CMV_ALL_UP	ZHU_CMV_ALL_UP		104	0.175012	2.10348	0	0.0105158	0.994	9036	tags=63%, list=46%, signal=117%
REACTOME_DOWNSTREAM_SIGNAL_TRANSDUCTION	REACTOME_DOWNSTREAM_SIGNAL_TRANSDUCTION		89	0.191007	2.10305	0.0020202	0.0105297	0.994	14127	tags=91%, list=72%, signal=323%
BIOCARTA_CD40_PATHWAY	BIOCARTA_CD40_PATHWAY		15	0.452621	2.10122	0.00205339	0.0106558	0.994	10747	tags=100%, list=55%, signal=221%
GRESHOCK_CANCER_COPY_NUMBER_UP	GRESHOCK_CANCER_COPY_NUMBER_UP		303	0.10409	2.10011	0	0.0107353	0.994	12430	tags=74%, list=63%, signal=198%
ZHAN_VARIABLE_EARLY_DIFFERENTIATION_GENES_DN	ZHAN_VARIABLE_EARLY_DIFFERENTIATION_GENES_DN		30	0.317195	2.09737	0.00201207	0.0109219	0.994	12099	tags=93%, list=62%, signal=243%
ALFANO_MYC_TARGETS	ALFANO_MYC_TARGETS		218	0.123355	2.09703	0.00423729	0.0109354	0.994	15248	tags=90%, list=78%, signal=399%
PANGAS_TUMOR_SUPPRESSION_BY_SMAD1_AND_SMAD5_DN	PANGAS_TUMOR_SUPPRESSION_BY_SMAD1_AND_SMAD5_DN		139	0.15117	2.09627	0.00409836	0.010959	0.994	10465	tags=68%, list=53%, signal=145%
HESS_TARGETS_OF_HOXA9_AND_MEIS1_UP	HESS_TARGETS_OF_HOXA9_AND_MEIS1_UP		59	0.226644	2.09625	0	0.0109455	0.994	11862	tags=83%, list=60%, signal=209%
CHOW_RASSF1_TARGETS_UP	CHOW_RASSF1_TARGETS_UP		25	0.356732	2.09472	0.00567108	0.0110181	0.994	10276	tags=88%, list=52%, signal=185%
PID_RAC1_PATHWAY	PID_RAC1_PATHWAY		50	0.254716	2.09292	0.00395257	0.011113	0.994	9142	tags=72%, list=47%, signal=134%
CAFFAREL_RESPONSE_TO_THC_DN	CAFFAREL_RESPONSE_TO_THC_DN		28	0.338829	2.09213	0.00195695	0.0111442	0.995	11581	tags=93%, list=59%, signal=226%
BIOCARTA_ATM_PATHWAY	BIOCARTA_ATM_PATHWAY		19	0.400031	2.09175	0.00385356	0.0111572	0.995	10747	tags=95%, list=55%, signal=209%
KEGG_DNA_REPLICATION	KEGG_DNA_REPLICATION		34	0.294487	2.08385	0.00187617	0.0117187	0.996	12699	tags=94%, list=65%, signal=266%
SCHAEFFER_PROSTATE_DEVELOPMENT_6HR_UP	SCHAEFFER_PROSTATE_DEVELOPMENT_6HR_UP		148	0.148342	2.08316	0.0019685	0.0117775	0.996	10634	tags=69%, list=54%, signal=149%
GOTTWEIN_TARGETS_OF_KSHV_MIR_K12_11	GOTTWEIN_TARGETS_OF_KSHV_MIR_K12_11		59	0.231122	2.08057	0.00573614	0.0119719	0.997	12107	tags=85%, list=62%, signal=221%
BRUINS_UVC_RESPONSE_MIDDLE	BRUINS_UVC_RESPONSE_MIDDLE		81	0.197211	2.07979	0.00196078	0.0119999	0.997	12861	tags=85%, list=66%, signal=246%
KEGG_RIG_I_LIKE_RECEPTOR_SIGNALING_PATHWAY	KEGG_RIG_I_LIKE_RECEPTOR_SIGNALING_PATHWAY		47	0.255131	2.07958	0.00399202	0.0119971	0.997	12540	tags=89%, list=64%, signal=247%
ONDER_CDH1_TARGETS_1_DN	ONDER_CDH1_TARGETS_1_DN		151	0.144787	2.07752	0.00212766	0.0121383	0.997	7576	tags=53%, list=39%, signal=86%
ZHANG_RESPONSE_TO_CANTHARIDIN_DN	ZHANG_RESPONSE_TO_CANTHARIDIN_DN		63	0.222446	2.07362	0	0.0124627	0.998	14648	tags=97%, list=75%, signal=381%
BIOCARTA_STRESS_PATHWAY	BIOCARTA_STRESS_PATHWAY		24	0.352945	2.07334	0.00968992	0.0124755	0.998	11887	tags=96%, list=61%, signal=243%
NUNODA_RESPONSE_TO_DASATINIB_IMATINIB_UP	NUNODA_RESPONSE_TO_DASATINIB_IMATINIB_UP		29	0.320239	2.06714	0.0040404	0.0128867	0.998	7934	tags=72%, list=40%, signal=121%
BIOCARTA_MAPK_PATHWAY	BIOCARTA_MAPK_PATHWAY		82	0.194229	2.06707	0.00398406	0.0128665	0.998	12237	tags=82%, list=62%, signal=216%
REACTOME_NGF_SIGNALLING_VIA_TRKA_FROM_THE_PLASMA_MEMBRANE	REACTOME_NGF_SIGNALLING_VIA_TRKA_FROM_THE_PLASMA_MEMBRANE		128	0.154829	2.06662	0.00604839	0.0129027	0.998	12771	tags=80%, list=65%, signal=229%
CONCANNON_APOPTOSIS_BY_EPOXOMICIN_UP	CONCANNON_APOPTOSIS_BY_EPOXOMICIN_UP		221	0.119448	2.06443	0.00838574	0.0130207	0.998	13664	tags=81%, list=70%, signal=265%
PID_TELOMERASE_PATHWAY	PID_TELOMERASE_PATHWAY		65	0.218522	2.0621	0	0.0131867	0.998	12933	tags=88%, list=66%, signal=256%
MYC_UP_COLLER	MYC_UP_COLLER		187	0.130741	2.06074	0.00625	0.0132939	0.998	12044	tags=74%, list=61%, signal=191%
REACTOME_KINESINS	REACTOME_KINESINS		23	0.363407	2.05856	0.00801603	0.0134646	0.998	6527	tags=70%, list=33%, signal=104%
JIANG_VHL_TARGETS	JIANG_VHL_TARGETS		124	0.159072	2.05829	0.0019305	0.0134715	0.998	13830	tags=86%, list=70%, signal=290%
TCGA_GLIOBLASTOMA_COPY_NUMBER_UP	TCGA_GLIOBLASTOMA_COPY_NUMBER_UP		63	0.219294	2.05465	0.00390625	0.0137358	0.998	10349	tags=75%, list=53%, signal=157%
KYNG_ENVIRONMENTAL_STRESS_RESPONSE_UP	KYNG_ENVIRONMENTAL_STRESS_RESPONSE_UP		51	0.240611	2.05265	0.00392927	0.0138753	0.998	7987	tags=65%, list=41%, signal=109%
JUBAN_TARGETS_OF_SPI1_AND_FLI1_DN	JUBAN_TARGETS_OF_SPI1_AND_FLI1_DN		76	0.203531	2.05099	0.00416667	0.0139689	0.998	13578	tags=89%, list=69%, signal=289%
OXFORD_RALA_OR_RALB_TARGETS_UP	OXFORD_RALA_OR_RALB_TARGETS_UP		45	0.260333	2.05075	0	0.0139729	0.998	13217	tags=93%, list=67%, signal=285%
HOLLMANN_APOPTOSIS_VIA_CD40_UP	HOLLMANN_APOPTOSIS_VIA_CD40_UP		185	0.130393	2.04997	0.00589391	0.0140191	0.999	10405	tags=66%, list=53%, signal=139%
REACTOME_ACTIVATION_OF_CHAPERONE_GENES_BY_XBP1S	REACTOME_ACTIVATION_OF_CHAPERONE_GENES_BY_XBP1S		40	0.272853	2.04916	0.00203252	0.0140727	0.999	12807	tags=93%, list=65%, signal=266%
WAMUNYOKOLI_OVARIAN_CANCER_LMP_DN	WAMUNYOKOLI_OVARIAN_CANCER_LMP_DN		180	0.131102	2.04797	0.00819672	0.0141807	0.999	10641	tags=67%, list=54%, signal=146%
OSWALD_HEMATOPOIETIC_STEM_CELL_IN_COLLAGEN_GEL_UP	OSWALD_HEMATOPOIETIC_STEM_CELL_IN_COLLAGEN_GEL_UP		209	0.121739	2.04761	0.00374532	0.0141922	0.999	7494	tags=50%, list=38%, signal=80%
FARMER_BREAST_CANCER_BASAL_VS_LULMINAL	FARMER_BREAST_CANCER_BASAL_VS_LULMINAL		302	0.104142	2.04723	0.00440529	0.0142137	0.999	11632	tags=70%, list=59%, signal=168%
REACTOME_CIRCADIAN_CLOCK	REACTOME_CIRCADIAN_CLOCK		50	0.241279	2.04413	0.00190476	0.0144472	0.999	9405	tags=72%, list=48%, signal=138%
KEGG_COLORECTAL_CANCER	KEGG_COLORECTAL_CANCER		61	0.22158	2.04111	0.00613497	0.0147486	1	13679	tags=92%, list=70%, signal=302%
PID_AURORA_A_PATHWAY	PID_AURORA_A_PATHWAY		29	0.316525	2.04073	0.00604839	0.0147593	1	13420	tags=100%, list=68%, signal=316%
KIM_ALL_DISORDERS_OLIGODENDROCYTE_NUMBER_CORR_DN	KIM_ALL_DISORDERS_OLIGODENDROCYTE_NUMBER_CORR_DN		30	0.308044	2.03764	0.0121457	0.0149927	1	3775	tags=50%, list=19%, signal=62%
FLECHNER_PBL_KIDNEY_TRANSPLANT_OK_VS_DONOR_DN	FLECHNER_PBL_KIDNEY_TRANSPLANT_OK_VS_DONOR_DN		40	0.27682	2.03525	0.00202429	0.0151906	1	10767	tags=83%, list=55%, signal=182%
HOLLEMAN_PREDNISOLONE_RESISTANCE_B_ALL_UP	HOLLEMAN_PREDNISOLONE_RESISTANCE_B_ALL_UP		19	0.39289	2.03463	0.00619835	0.0152275	1	10887	tags=95%, list=55%, signal=213%
REACTOME_TRIF_MEDIATED_TLR3_SIGNALING	REACTOME_TRIF_MEDIATED_TLR3_SIGNALING		71	0.201638	2.0309	0.00396825	0.0155284	1	12363	tags=83%, list=63%, signal=224%
REACTOME_FORMATION_OF_TUBULIN_FOLDING_INTERMEDIATES_BY_CCT_TRIC	REACTOME_FORMATION_OF_TUBULIN_FOLDING_INTERMEDIATES_BY_CCT_TRIC		20	0.385342	2.03078	0.00402414	0.0155302	1	11087	tags=95%, list=57%, signal=218%
PID_FAK_PATHWAY	PID_FAK_PATHWAY		57	0.232608	2.02911	0.00198413	0.0156873	1	14038	tags=95%, list=72%, signal=332%
BOYAULT_LIVER_CANCER_SUBCLASS_G12_UP	BOYAULT_LIVER_CANCER_SUBCLASS_G12_UP		36	0.280377	2.02829	0.00804829	0.0157489	1	12495	tags=92%, list=64%, signal=252%
KEGG_RNA_POLYMERASE	KEGG_RNA_POLYMERASE		27	0.324335	2.02704	0.00202429	0.0158507	1	11086	tags=89%, list=56%, signal=204%
JIANG_AGING_CEREBRAL_CORTEX_UP	JIANG_AGING_CEREBRAL_CORTEX_UP		33	0.29477	2.02618	0.00194932	0.0159134	1	9685	tags=79%, list=49%, signal=155%
KEGG_REGULATION_OF_AUTOPHAGY	KEGG_REGULATION_OF_AUTOPHAGY		18	0.381731	2.02319	0.00203252	0.0161802	1	11048	tags=94%, list=56%, signal=216%
PID_PDGFRB_PATHWAY	PID_PDGFRB_PATHWAY		126	0.152656	2.02284	0.00408998	0.016179	1	12285	tags=78%, list=63%, signal=207%
GARGALOVIC_RESPONSE_TO_OXIDIZED_PHOSPHOLIPIDS_TURQUOISE_UP	GARGALOVIC_RESPONSE_TO_OXIDIZED_PHOSPHOLIPIDS_TURQUOISE_UP		74	0.203939	2.02139	0.0136452	0.0163101	1	4763	tags=45%, list=24%, signal=59%
REACTOME_INHIBITION_OF_THE_PROTEOLYTIC_ACTIVITY_OF_APC_C_REQUIRED_FOR_THE_ONSET_OF_ANAPHASE_BY_MITOTIC_SPINDLE_CHECKPOINT_COMPONENTS	REACTOME_INHIBITION_OF_THE_PROTEOLYTIC_ACTIVITY_OF_APC_C_REQUIRED_FOR_THE_ONSET_OF_ANAPHASE_BY_MITOTIC_SPINDLE_CHECKPOINT_COMPONENTS		18	0.390088	2.0206	0.003861	0.0163795	1	9794	tags=89%, list=50%, signal=177%
REACTOME_CYTOKINE_SIGNALING_IN_IMMUNE_SYSTEM	REACTOME_CYTOKINE_SIGNALING_IN_IMMUNE_SYSTEM		235	0.111475	2.02004	0.00204499	0.0164105	1	8359	tags=54%, list=43%, signal=92%
P21_P53_ANY_DN	P21_P53_ANY_DN		34	0.291139	2.01835	0.00790514	0.0165676	1	10456	tags=82%, list=53%, signal=176%
BCATENIN_BILD	BCATENIN_BILD		47	0.255414	2.0174	0.0103093	0.0166287	1	13787	tags=96%, list=70%, signal=321%
MARTINEZ_RB1_TARGETS_DN	MARTINEZ_RB1_TARGETS_DN		471	0.0808494	2.01665	0.00788955	0.0166688	1	10616	tags=62%, list=54%, signal=132%
REACTOME_TRAF6_MEDIATED_INDUCTION_OF_NFKB_AND_MAP_KINASES_UPON_TLR7_8_OR_9_ACTIVATION	REACTOME_TRAF6_MEDIATED_INDUCTION_OF_NFKB_AND_MAP_KINASES_UPON_TLR7_8_OR_9_ACTIVATION		73	0.192557	2.01525	0.00215517	0.0167682	1	12363	tags=82%, list=63%, signal=221%
TSAI_RESPONSE_TO_IONIZING_RADIATION	TSAI_RESPONSE_TO_IONIZING_RADIATION		133	0.149701	2.01403	0.00753296	0.0168531	1	11983	tags=76%, list=61%, signal=194%
KRIVTSOV.LGMPVSGMP_UP	KRIVTSOV.LGMPVSGMP_UP		131	0.150812	2.01378	0.00369686	0.0168527	1	11140	tags=72%, list=57%, signal=165%
KEGG_ENDOCYTOSIS	KEGG_ENDOCYTOSIS		168	0.136331	2.01157	0.00208768	0.0170435	1	14400	tags=87%, list=73%, signal=324%
BIOCARTA_CARM_ER_PATHWAY	BIOCARTA_CARM_ER_PATHWAY		34	0.295113	2.01117	0.00619835	0.0170544	1	9801	tags=79%, list=50%, signal=158%
GENTILE_UV_RESPONSE_CLUSTER_D5	GENTILE_UV_RESPONSE_CLUSTER_D5		35	0.290436	2.01004	0.00204499	0.01715	1	10569	tags=83%, list=54%, signal=179%
SOMERVAILLE.LOWLSCVSHSC_UP	SOMERVAILLE.LOWLSCVSHSC_UP		70	0.204338	2.00864	0.00582524	0.0172662	1	10861	tags=76%, list=55%, signal=169%
MARZEC_IL2_SIGNALING_DN	MARZEC_IL2_SIGNALING_DN		34	0.29229	2.00772	0.00407332	0.0173386	1	8702	tags=74%, list=44%, signal=132%
BYSTROEM_CORRELATED_WITH_IL5_DN	BYSTROEM_CORRELATED_WITH_IL5_DN		58	0.222577	2.00736	0.0105042	0.017347	1	11884	tags=83%, list=61%, signal=209%
GARGALOVIC_RESPONSE_TO_OXIDIZED_PHOSPHOLIPIDS_TURQUOISE_DN	GARGALOVIC_RESPONSE_TO_OXIDIZED_PHOSPHOLIPIDS_TURQUOISE_DN		48	0.241766	2.00663	0.00199601	0.0173912	1	13663	tags=94%, list=70%, signal=308%
KEGG_HOMOLOGOUS_RECOMBINATION	KEGG_HOMOLOGOUS_RECOMBINATION		23	0.347855	2.00598	0.0101215	0.0174502	1	7685	tags=74%, list=39%, signal=121%
BIOCARTA_CDC42RAC_PATHWAY	BIOCARTA_CDC42RAC_PATHWAY		15	0.432058	2.00549	0.00616016	0.0174811	1	9842	tags=93%, list=50%, signal=187%
BOCHKIS_FOXA2_TARGETS	BOCHKIS_FOXA2_TARGETS		380	0.0881476	2.00447	0.00199601	0.0175508	1	15602	tags=88%, list=80%, signal=422%
MORI_PRE_BI_LYMPHOCYTE_UP	MORI_PRE_BI_LYMPHOCYTE_UP		75	0.197051	2.00291	0.00604839	0.0176914	1	12892	tags=85%, list=66%, signal=248%
YAO_TEMPORAL_RESPONSE_TO_PROGESTERONE_CLUSTER_12	YAO_TEMPORAL_RESPONSE_TO_PROGESTERONE_CLUSTER_12		70	0.20517	2.00143	0.00798403	0.0178428	1	14489	tags=94%, list=74%, signal=359%
REACTOME_ASSOCIATION_OF_TRIC_CCT_WITH_TARGET_PROTEINS_DURING_BIOSYNTHESIS	REACTOME_ASSOCIATION_OF_TRIC_CCT_WITH_TARGET_PROTEINS_DURING_BIOSYNTHESIS		25	0.335289	2.001	0.00792079	0.0178579	1	13051	tags=100%, list=67%, signal=298%
MISSIAGLIA_REGULATED_BY_METHYLATION_UP	MISSIAGLIA_REGULATED_BY_METHYLATION_UP		111	0.15855	2	0.00573614	0.0179471	1	11932	tags=77%, list=61%, signal=194%
BERTUCCI_MEDULLARY_VS_DUCTAL_BREAST_CANCER_UP	BERTUCCI_MEDULLARY_VS_DUCTAL_BREAST_CANCER_UP		181	0.128874	1.99987	0.00589391	0.017936	1	13864	tags=83%, list=71%, signal=282%
TOMLINS_PROSTATE_CANCER_UP	TOMLINS_PROSTATE_CANCER_UP		38	0.272526	1.9985	0.00401606	0.0180413	1	12219	tags=89%, list=62%, signal=237%
REACTOME_MEMBRANE_TRAFFICKING	REACTOME_MEMBRANE_TRAFFICKING		112	0.161757	1.99709	0.0101626	0.0181707	1	11385	tags=74%, list=58%, signal=176%
REACTOME_ACTIVATION_OF_THE_PRE_REPLICATIVE_COMPLEX	REACTOME_ACTIVATION_OF_THE_PRE_REPLICATIVE_COMPLEX		28	0.317539	1.99536	0.0038835	0.0183437	1	12699	tags=96%, list=65%, signal=273%
BROWNE_HCMV_INFECTION_48HR_UP	BROWNE_HCMV_INFECTION_48HR_UP		165	0.132443	1.99484	0.00660793	0.0183786	1	10385	tags=66%, list=53%, signal=139%
AMUNDSON_POOR_SURVIVAL_AFTER_GAMMA_RADIATION_2G	AMUNDSON_POOR_SURVIVAL_AFTER_GAMMA_RADIATION_2G		159	0.139633	1.99451	0.00425532	0.0183853	1	12091	tags=75%, list=62%, signal=195%
LI_DCP2_BOUND_MRNA	LI_DCP2_BOUND_MRNA		80	0.191672	1.99114	0	0.0187032	1	14895	tags=95%, list=76%, signal=393%
TERAO_AOX4_TARGETS_SKIN_UP	TERAO_AOX4_TARGETS_SKIN_UP		34	0.294413	1.98713	0.00603622	0.0190992	1	10969	tags=85%, list=56%, signal=193%
KEGG_PATHOGENIC_ESCHERICHIA_COLI_INFECTION	KEGG_PATHOGENIC_ESCHERICHIA_COLI_INFECTION		53	0.233204	1.98592	0.00596422	0.0192065	1	11726	tags=83%, list=60%, signal=206%
GARGALOVIC_RESPONSE_TO_OXIDIZED_PHOSPHOLIPIDS_RED_UP	GARGALOVIC_RESPONSE_TO_OXIDIZED_PHOSPHOLIPIDS_RED_UP		17	0.395473	1.9859	0.00978474	0.019179	1	2634	tags=53%, list=13%, signal=61%
CREIGHTON_ENDOCRINE_THERAPY_RESISTANCE_5	CREIGHTON_ENDOCRINE_THERAPY_RESISTANCE_5		417	0.0850263	1.9846	0.00408163	0.0192978	1	13095	tags=75%, list=67%, signal=221%
PYEON_HPV_POSITIVE_TUMORS_UP	PYEON_HPV_POSITIVE_TUMORS_UP		79	0.187151	1.98324	0.00190114	0.0194129	1	13232	tags=86%, list=67%, signal=263%
REACTOME_HOMOLOGOUS_RECOMBINATION_REPAIR_OF_REPLICATION_INDEPENDENT_DOUBLE_STRAND_BREAKS	REACTOME_HOMOLOGOUS_RECOMBINATION_REPAIR_OF_REPLICATION_INDEPENDENT_DOUBLE_STRAND_BREAKS		15	0.42348	1.98118	0	0.0196009	1	8702	tags=87%, list=44%, signal=156%
GRAHAM_NORMAL_QUIESCENT_VS_NORMAL_DIVIDING_UP	GRAHAM_NORMAL_QUIESCENT_VS_NORMAL_DIVIDING_UP		59	0.22618	1.97605	0.0119522	0.0201952	1	6217	tags=54%, list=32%, signal=79%
WAMUNYOKOLI_OVARIAN_CANCER_GRADES_1_2_UP	WAMUNYOKOLI_OVARIAN_CANCER_GRADES_1_2_UP		130	0.148245	1.97603	0.0114723	0.0201684	1	9034	tags=61%, list=46%, signal=112%
GREENBAUM_E2A_TARGETS_UP	GREENBAUM_E2A_TARGETS_UP		32	0.287265	1.97495	0.00578035	0.0202728	1	7862	tags=69%, list=40%, signal=115%
REACTOME_SIGNALING_BY_EGFR_IN_CANCER	REACTOME_SIGNALING_BY_EGFR_IN_CANCER		102	0.17368	1.97317	0	0.0204781	1	13923	tags=88%, list=71%, signal=302%
RODRIGUES_DCC_TARGETS_DN	RODRIGUES_DCC_TARGETS_DN		114	0.162442	1.97157	0.0039604	0.0206392	1	15248	tags=94%, list=78%, signal=419%
PID_MET_PATHWAY	PID_MET_PATHWAY		78	0.190848	1.97133	0.00769231	0.0206428	1	14634	tags=94%, list=75%, signal=367%
REACTOME_PROCESSING_OF_CAPPED_INTRONLESS_PRE_MRNA	REACTOME_PROCESSING_OF_CAPPED_INTRONLESS_PRE_MRNA		23	0.336384	1.96741	0.00804829	0.0210793	1	8763	tags=78%, list=45%, signal=141%
REACTOME_RORA_ACTIVATES_CIRCADIAN_EXPRESSION	REACTOME_RORA_ACTIVATES_CIRCADIAN_EXPRESSION		23	0.347158	1.96618	0.00412371	0.0212121	1	9405	tags=83%, list=48%, signal=158%
CHICAS_RB1_TARGETS_LOW_SERUM	CHICAS_RB1_TARGETS_LOW_SERUM		77	0.189928	1.96502	0.00412371	0.0213298	1	12087	tags=81%, list=62%, signal=209%
HOEBEKE_LYMPHOID_STEM_CELL_UP	HOEBEKE_LYMPHOID_STEM_CELL_UP		80	0.187205	1.96357	0.00202429	0.0214727	1	11303	tags=76%, list=58%, signal=179%
DEURIG_T_CELL_PROLYMPHOCYTIC_LEUKEMIA_UP	DEURIG_T_CELL_PROLYMPHOCYTIC_LEUKEMIA_UP		321	0.0943217	1.96253	0.00398406	0.0215663	1	16212	tags=92%, list=83%, signal=520%
TAKAO_RESPONSE_TO_UVB_RADIATION_UP	TAKAO_RESPONSE_TO_UVB_RADIATION_UP		78	0.194403	1.96113	0.014433	0.0216977	1	11294	tags=77%, list=58%, signal=181%
HIRSCH_CELLULAR_TRANSFORMATION_SIGNATURE_DN	HIRSCH_CELLULAR_TRANSFORMATION_SIGNATURE_DN		88	0.17929	1.95986	0.00208768	0.0218393	1	7869	tags=58%, list=40%, signal=96%
LY_AGING_OLD_DN	LY_AGING_OLD_DN		53	0.221298	1.95871	0.00407332	0.0219809	1	10478	tags=75%, list=53%, signal=162%
SHEPARD_BMYB_MORPHOLINO_UP	SHEPARD_BMYB_MORPHOLINO_UP		190	0.122561	1.95754	0	0.0220896	1	12696	tags=77%, list=65%, signal=216%
PID_NECTIN_PATHWAY	PID_NECTIN_PATHWAY		26	0.316736	1.95702	0.00567108	0.0221409	1	10396	tags=85%, list=53%, signal=180%
BONOME_OVARIAN_CANCER_SURVIVAL_SUBOPTIMAL_DEBULKING	BONOME_OVARIAN_CANCER_SURVIVAL_SUBOPTIMAL_DEBULKING		462	0.0800957	1.95451	0.00594059	0.0224233	1	15284	tags=86%, list=78%, signal=379%
OKUMURA_INFLAMMATORY_RESPONSE_LPS	OKUMURA_INFLAMMATORY_RESPONSE_LPS		161	0.132383	1.94609	0.00759013	0.023539	1	11439	tags=71%, list=58%, signal=170%
PID_MTOR_4PATHWAY	PID_MTOR_4PATHWAY		65	0.20378	1.94561	0.00788955	0.023558	1	14127	tags=92%, list=72%, signal=328%
REACTOME_APC_CDC20_MEDIATED_DEGRADATION_OF_NEK2A	REACTOME_APC_CDC20_MEDIATED_DEGRADATION_OF_NEK2A		21	0.358367	1.94368	0.00203666	0.0237813	1	9794	tags=86%, list=50%, signal=171%
BROWNE_HCMV_INFECTION_4HR_DN	BROWNE_HCMV_INFECTION_4HR_DN		225	0.111012	1.94348	0.00833333	0.0237749	1	12323	tags=74%, list=63%, signal=196%
NATSUME_RESPONSE_TO_INTERFERON_BETA_DN	NATSUME_RESPONSE_TO_INTERFERON_BETA_DN		50	0.236005	1.94296	0.00601202	0.023838	1	11863	tags=84%, list=60%, signal=212%
ZHU_CMV_24_HR_UP	ZHU_CMV_24_HR_UP		81	0.187729	1.94228	0.0139721	0.0239106	1	11835	tags=79%, list=60%, signal=198%
MULLIGAN_NTF3_SIGNALING_VIA_INSR_AND_IGF1R_UP	MULLIGAN_NTF3_SIGNALING_VIA_INSR_AND_IGF1R_UP		21	0.355321	1.94137	0.00598802	0.0239998	1	12657	tags=100%, list=65%, signal=281%
IRITANI_MAD1_TARGETS_DN	IRITANI_MAD1_TARGETS_DN		43	0.252547	1.94033	0.00206186	0.0240848	1	10570	tags=79%, list=54%, signal=171%
PID_HIF2PATHWAY	PID_HIF2PATHWAY		30	0.305977	1.93815	0.01	0.0243258	1	7086	tags=67%, list=36%, signal=104%
YAGI_AML_SURVIVAL	YAGI_AML_SURVIVAL		113	0.154848	1.93719	0.0059761	0.0243966	1	10523	tags=69%, list=54%, signal=148%
REACTOME_TRANSCRIPTIONAL_ACTIVITY_OF_SMAD2_SMAD3_SMAD4_HETEROTRIMER	REACTOME_TRANSCRIPTIONAL_ACTIVITY_OF_SMAD2_SMAD3_SMAD4_HETEROTRIMER		34	0.274037	1.93654	0	0.0244648	1	10791	tags=82%, list=55%, signal=183%
BURTON_ADIPOGENESIS_6	BURTON_ADIPOGENESIS_6		169	0.127342	1.93631	0.00381679	0.0244647	1	15403	tags=91%, list=78%, signal=420%
HSCVSCMP_DN	HSCVSCMP_DN		121	0.153117	1.93588	0.00852879	0.0244924	1	14852	tags=91%, list=76%, signal=372%
WAMUNYOKOLI_OVARIAN_CANCER_LMP_UP	WAMUNYOKOLI_OVARIAN_CANCER_LMP_UP		237	0.110538	1.93585	0.00622407	0.0244714	1	14664	tags=86%, list=75%, signal=335%
SOMERVAILLE.HIGHLSC_DN	SOMERVAILLE.HIGHLSC_DN		225	0.111381	1.93571	0.00796813	0.0244607	1	10746	tags=66%, list=55%, signal=144%
HSA04115_P53_SIGNALING_PATHWAY	HSA04115_P53_SIGNALING_PATHWAY		55	0.221805	1.93525	0.00603622	0.0244972	1	9930	tags=73%, list=51%, signal=147%
LANDIS_ERBB2_BREAST_TUMORS_324_UP	LANDIS_ERBB2_BREAST_TUMORS_324_UP		133	0.143213	1.93431	0.015534	0.0246375	1	12257	tags=77%, list=62%, signal=203%
BERNARD_PPAPDC1B_TARGETS_UP	BERNARD_PPAPDC1B_TARGETS_UP		34	0.280118	1.93126	0.00383877	0.0250457	1	7209	tags=65%, list=37%, signal=102%
REACTOME_FANCONI_ANEMIA_PATHWAY	REACTOME_FANCONI_ANEMIA_PATHWAY		19	0.374344	1.92964	0.0139165	0.0252378	1	9185	tags=84%, list=47%, signal=158%
SESTO_RESPONSE_TO_UV_C5	SESTO_RESPONSE_TO_UV_C5		46	0.241632	1.92549	0.0100806	0.0258174	1	7213	tags=61%, list=37%, signal=96%
HONMA_DOCETAXEL_RESISTANCE	HONMA_DOCETAXEL_RESISTANCE		29	0.298663	1.92381	0.00982318	0.0260662	1	13770	tags=100%, list=70%, signal=335%
REACTOME_REGULATION_OF_GLUCOKINASE_BY_GLUCOKINASE_REGULATORY_PROTEIN	REACTOME_REGULATION_OF_GLUCOKINASE_BY_GLUCOKINASE_REGULATORY_PROTEIN		26	0.319709	1.92284	0.0135922	0.02618	1	9583	tags=81%, list=49%, signal=158%
REACTOME_MITOCHONDRIAL_PROTEIN_IMPORT	REACTOME_MITOCHONDRIAL_PROTEIN_IMPORT		47	0.2361	1.92198	0.00787402	0.0262711	1	10825	tags=79%, list=55%, signal=175%
REACTOME_MRNA_CAPPING	REACTOME_MRNA_CAPPING		26	0.31327	1.92154	0.00816326	0.0262857	1	7445	tags=69%, list=38%, signal=111%
SMIRNOV_RESPONSE_TO_IR_6HR_UP	SMIRNOV_RESPONSE_TO_IR_6HR_UP		143	0.136198	1.92145	0.0102459	0.0262626	1	9696	tags=63%, list=49%, signal=124%
FONTAINE_FOLLICULAR_THYROID_ADENOMA_DN	FONTAINE_FOLLICULAR_THYROID_ADENOMA_DN		61	0.205369	1.92145	0.00612245	0.0262273	1	12066	tags=82%, list=61%, signal=212%
KEGG_SNARE_INTERACTIONS_IN_VESICULAR_TRANSPORT	KEGG_SNARE_INTERACTIONS_IN_VESICULAR_TRANSPORT		35	0.269248	1.91895	0.00756144	0.0265289	1	12666	tags=91%, list=65%, signal=257%
REACTOME_G1_PHASE	REACTOME_G1_PHASE		33	0.27721	1.91786	0.00608519	0.0266611	1	10029	tags=79%, list=51%, signal=161%
CHNG_MULTIPLE_MYELOMA_HYPERPLOID_UP	CHNG_MULTIPLE_MYELOMA_HYPERPLOID_UP		48	0.231884	1.91697	0.00590551	0.0267797	1	12630	tags=88%, list=64%, signal=245%
CARD_MIR302A_TARGETS	CARD_MIR302A_TARGETS		73	0.19079	1.91685	0.0101215	0.026756	1	7559	tags=58%, list=39%, signal=93%
GAVIN_FOXP3_TARGETS_CLUSTER_P6	GAVIN_FOXP3_TARGETS_CLUSTER_P6		84	0.182136	1.91581	0.00603622	0.0268828	1	7887	tags=58%, list=40%, signal=97%
KEGG_TOLL_LIKE_RECEPTOR_SIGNALING_PATHWAY	KEGG_TOLL_LIKE_RECEPTOR_SIGNALING_PATHWAY		76	0.189874	1.91412	0.00394477	0.027132	1	9972	tags=70%, list=51%, signal=141%
LEE_CALORIE_RESTRICTION_MUSCLE_UP	LEE_CALORIE_RESTRICTION_MUSCLE_UP		37	0.265643	1.91235	0.0178218	0.0273926	1	11237	tags=84%, list=57%, signal=196%
UZONYI_RESPONSE_TO_LEUKOTRIENE_AND_THROMBIN	UZONYI_RESPONSE_TO_LEUKOTRIENE_AND_THROMBIN		34	0.275711	1.9105	0.0103093	0.0276613	1	2101	tags=38%, list=11%, signal=43%
GAUSSMANN_MLL_AF4_FUSION_TARGETS_C_UP	GAUSSMANN_MLL_AF4_FUSION_TARGETS_C_UP		154	0.131998	1.90813	0.01	0.0279808	1	13994	tags=84%, list=71%, signal=292%
PID_VEGFR1_2_PATHWAY	PID_VEGFR1_2_PATHWAY		68	0.196704	1.90796	0.00998004	0.0279639	1	12024	tags=81%, list=61%, signal=208%
CHEN_ETV5_TARGETS_TESTIS	CHEN_ETV5_TARGETS_TESTIS		20	0.351316	1.90717	0.0143443	0.0280474	1	11754	tags=95%, list=60%, signal=237%
CHARAFE_BREAST_CANCER_LUMINAL_VS_MESENCHYMAL_DN	CHARAFE_BREAST_CANCER_LUMINAL_VS_MESENCHYMAL_DN		418	0.0825931	1.9067	0.00847458	0.0280831	1	16158	tags=90%, list=82%, signal=501%
DURCHDEWALD_SKIN_CARCINOGENESIS_DN	DURCHDEWALD_SKIN_CARCINOGENESIS_DN		241	0.107284	1.90595	0.00961539	0.0281624	1	11843	tags=71%, list=60%, signal=177%
BIOCARTA_RACCYCD_PATHWAY	BIOCARTA_RACCYCD_PATHWAY		25	0.313761	1.90414	0.00407332	0.0284411	1	12688	tags=96%, list=65%, signal=271%
JOHNSTONE_PARVB_TARGETS_1_DN	JOHNSTONE_PARVB_TARGETS_1_DN		54	0.216823	1.90002	0.00798403	0.0290229	1	8838	tags=67%, list=45%, signal=121%
BIOCARTA_CELLCYCLE_PATHWAY	BIOCARTA_CELLCYCLE_PATHWAY		20	0.353721	1.89785	0.0100806	0.029309	1	12688	tags=100%, list=65%, signal=283%
WARTERS_RESPONSE_TO_IR_SKIN	WARTERS_RESPONSE_TO_IR_SKIN		66	0.201332	1.89691	0.0181818	0.0294199	1	6765	tags=55%, list=34%, signal=83%
RASHI_NFKB1_TARGETS	RASHI_NFKB1_TARGETS		19	0.350667	1.89496	0.0100806	0.029744	1	5518	tags=63%, list=28%, signal=88%
SEIDEN_MET_SIGNALING	SEIDEN_MET_SIGNALING		16	0.398617	1.89422	0.00998004	0.029861	1	8127	tags=81%, list=41%, signal=139%
BILANGES_SERUM_SENSITIVE_GENES	BILANGES_SERUM_SENSITIVE_GENES		81	0.177873	1.89315	0.0104167	0.0300351	1	9605	tags=67%, list=49%, signal=130%
LUI_TARGETS_OF_PAX8_PPARG_FUSION	LUI_TARGETS_OF_PAX8_PPARG_FUSION		32	0.282818	1.89288	0.0109649	0.0300476	1	10402	tags=81%, list=53%, signal=173%
BIOCARTA_P38MAPK_PATHWAY	BIOCARTA_P38MAPK_PATHWAY		36	0.26572	1.89209	0.014	0.0301575	1	12237	tags=89%, list=62%, signal=236%
KEGG_NOD_LIKE_RECEPTOR_SIGNALING_PATHWAY	KEGG_NOD_LIKE_RECEPTOR_SIGNALING_PATHWAY		52	0.21573	1.8915	0.012	0.0302346	1	8230	tags=63%, list=42%, signal=109%
PROVENZANI_METASTASIS_DN	PROVENZANI_METASTASIS_DN		126	0.145446	1.89145	0.0135922	0.0302021	1	13360	tags=83%, list=68%, signal=257%
DITTMER_PTHLH_TARGETS_DN	DITTMER_PTHLH_TARGETS_DN		64	0.201301	1.88957	0.0133333	0.0305208	1	10779	tags=75%, list=55%, signal=166%
WAKABAYASHI_ADIPOGENESIS_PPARG_RXRA_BOUND_WITH_H4K20ME1_MARK	WAKABAYASHI_ADIPOGENESIS_PPARG_RXRA_BOUND_WITH_H4K20ME1_MARK		129	0.142497	1.88895	0.00449438	0.0305875	1	15323	tags=92%, list=78%, signal=418%
PID_IFNG_PATHWAY	PID_IFNG_PATHWAY		36	0.270949	1.88725	0.00838574	0.030833	1	8319	tags=69%, list=42%, signal=120%
REACTOME_CIRCADIAN_REPRESSION_OF_EXPRESSION_BY_REV_ERBA	REACTOME_CIRCADIAN_REPRESSION_OF_EXPRESSION_BY_REV_ERBA		22	0.339227	1.88588	0.00409836	0.0310347	1	9405	tags=82%, list=48%, signal=157%
BOHN_PRIMARY_IMMUNODEFICIENCY_SYNDROM_UP	BOHN_PRIMARY_IMMUNODEFICIENCY_SYNDROM_UP		42	0.242659	1.88466	0.00982318	0.0311811	1	11600	tags=83%, list=59%, signal=203%
SANA_RESPONSE_TO_IFNG_DN	SANA_RESPONSE_TO_IFNG_DN		76	0.181074	1.88454	0.00974659	0.0311592	1	11435	tags=76%, list=58%, signal=182%
REACTOME_PI_METABOLISM	REACTOME_PI_METABOLISM		47	0.234745	1.87671	0.0123967	0.0325217	1	9599	tags=72%, list=49%, signal=141%
WENDT_COHESIN_TARGETS_UP	WENDT_COHESIN_TARGETS_UP		30	0.283402	1.87652	0.01	0.0325246	1	12107	tags=90%, list=62%, signal=235%
HU_GENOTOXIN_ACTION_DIRECT_VS_INDIRECT_24HR	HU_GENOTOXIN_ACTION_DIRECT_VS_INDIRECT_24HR		49	0.228065	1.87649	0.0116959	0.0324845	1	6748	tags=57%, list=34%, signal=87%
REACTOME_METABOLISM_OF_NUCLEOTIDES	REACTOME_METABOLISM_OF_NUCLEOTIDES		66	0.194313	1.87573	0.00998004	0.0325877	1	12254	tags=82%, list=62%, signal=217%
REACTOME_E2F_MEDIATED_REGULATION_OF_DNA_REPLICATION	REACTOME_E2F_MEDIATED_REGULATION_OF_DNA_REPLICATION		33	0.275126	1.87461	0.011811	0.0327445	1	13043	tags=94%, list=66%, signal=280%
KENNY_CTNNB1_TARGETS_DN	KENNY_CTNNB1_TARGETS_DN		48	0.228777	1.8732	0.0122699	0.0329405	1	12282	tags=85%, list=63%, signal=228%
GUO_TARGETS_OF_IRS1_AND_IRS2	GUO_TARGETS_OF_IRS1_AND_IRS2		92	0.169198	1.87267	0.0189474	0.0329934	1	13118	tags=84%, list=67%, signal=251%
CHEOK_RESPONSE_TO_HD_MTX_DN	CHEOK_RESPONSE_TO_HD_MTX_DN		24	0.3245	1.87211	0.0142566	0.0330481	1	9174	tags=79%, list=47%, signal=148%
KRIVTSOV.LGMPVSGMP_DN	KRIVTSOV.LGMPVSGMP_DN		143	0.13312	1.87102	0.0150862	0.03323	1	13461	tags=82%, list=69%, signal=259%
REACTOME_SYNTHESIS_OF_PIPS_AT_THE_GOLGI_MEMBRANE	REACTOME_SYNTHESIS_OF_PIPS_AT_THE_GOLGI_MEMBRANE		17	0.370964	1.87015	0.00769231	0.0333186	1	8886	tags=82%, list=45%, signal=150%
P21_P53_MIDDLE_DN	P21_P53_MIDDLE_DN		18	0.36829	1.86981	0.015444	0.0333413	1	8041	tags=78%, list=41%, signal=132%
REACTOME_DOUBLE_STRAND_BREAK_REPAIR	REACTOME_DOUBLE_STRAND_BREAK_REPAIR		21	0.334623	1.86936	0.0171756	0.0333887	1	9325	tags=81%, list=48%, signal=154%
KASLER_HDAC7_TARGETS_1_UP	KASLER_HDAC7_TARGETS_1_UP		177	0.121076	1.86862	0.0110701	0.0334776	1	15272	tags=90%, list=78%, signal=401%
REACTOME_MAP_KINASE_ACTIVATION_IN_TLR_CASCADE	REACTOME_MAP_KINASE_ACTIVATION_IN_TLR_CASCADE		49	0.227634	1.86746	0.00814664	0.0336462	1	12363	tags=86%, list=63%, signal=231%
REACTOME_NOD1_2_SIGNALING_PATHWAY	REACTOME_NOD1_2_SIGNALING_PATHWAY		29	0.28567	1.86707	0.0176817	0.0336654	1	9288	tags=76%, list=47%, signal=144%
YAGI_AML_WITH_T_8_21_TRANSLOCATION	YAGI_AML_WITH_T_8_21_TRANSLOCATION		338	0.0886757	1.86506	0.00795229	0.0340036	1	12861	tags=74%, list=66%, signal=212%
HEDENFALK_BREAST_CANCER_BRACX_DN	HEDENFALK_BREAST_CANCER_BRACX_DN		18	0.371342	1.86464	0.0176817	0.0340499	1	6891	tags=72%, list=35%, signal=111%
WANG_ESOPHAGUS_CANCER_VS_NORMAL_DN	WANG_ESOPHAGUS_CANCER_VS_NORMAL_DN		94	0.162356	1.86449	0.00976562	0.0340328	1	12485	tags=80%, list=64%, signal=218%
REACTOME_SIGNALING_BY_ERBB4	REACTOME_SIGNALING_BY_ERBB4		81	0.182014	1.86292	0.0119522	0.0342775	1	14127	tags=90%, list=72%, signal=320%
REACTOME_GLUCOSE_TRANSPORT	REACTOME_GLUCOSE_TRANSPORT		36	0.262074	1.86124	0.01002	0.0345599	1	9583	tags=75%, list=49%, signal=146%
PID_RHOA_PATHWAY	PID_RHOA_PATHWAY		43	0.238386	1.85808	0.0063425	0.0351389	1	13129	tags=91%, list=67%, signal=273%
YAO_TEMPORAL_RESPONSE_TO_PROGESTERONE_CLUSTER_7	YAO_TEMPORAL_RESPONSE_TO_PROGESTERONE_CLUSTER_7		68	0.192553	1.85647	0.0138889	0.035407	1	7488	tags=57%, list=38%, signal=92%
REACTOME_ACTIVATION_OF_GENES_BY_ATF4	REACTOME_ACTIVATION_OF_GENES_BY_ATF4		20	0.351548	1.85554	0.0145228	0.0355263	1	8806	tags=80%, list=45%, signal=145%
STONER_ESOPHAGEAL_CARCINOGENESIS_UP	STONER_ESOPHAGEAL_CARCINOGENESIS_UP		34	0.265234	1.85553	0.0270793	0.0354883	1	9232	tags=74%, list=47%, signal=139%
BURTON_ADIPOGENESIS_PEAK_AT_16HR	BURTON_ADIPOGENESIS_PEAK_AT_16HR		39	0.251713	1.85524	0.0202429	0.035505	1	13183	tags=92%, list=67%, signal=281%
KEGG_CHRONIC_MYELOID_LEUKEMIA	KEGG_CHRONIC_MYELOID_LEUKEMIA		71	0.187179	1.85266	0.014433	0.0359693	1	14304	tags=92%, list=73%, signal=337%
GOTZMANN_EPITHELIAL_TO_MESENCHYMAL_TRANSITION_DN	GOTZMANN_EPITHELIAL_TO_MESENCHYMAL_TRANSITION_DN		189	0.118529	1.84854	0.0122951	0.0367824	1	8701	tags=56%, list=44%, signal=100%
REACTOME_RNA_POL_III_TRANSCRIPTION_INITIATION_FROM_TYPE_2_PROMOTER	REACTOME_RNA_POL_III_TRANSCRIPTION_INITIATION_FROM_TYPE_2_PROMOTER		22	0.328207	1.84656	0.00996016	0.0371755	1	9621	tags=82%, list=49%, signal=160%
OLSSON_E2F3_TARGETS_DN	OLSSON_E2F3_TARGETS_DN		40	0.250463	1.84609	0.0143443	0.0372406	1	10302	tags=78%, list=52%, signal=163%
RODRIGUES_THYROID_CARCINOMA_ANAPLASTIC_DN	RODRIGUES_THYROID_CARCINOMA_ANAPLASTIC_DN		463	0.074165	1.84348	0.015444	0.0377352	1	16760	tags=93%, list=85%, signal=620%
REACTOME_CYCLIN_A_B1_ASSOCIATED_EVENTS_DURING_G2_M_TRANSITION	REACTOME_CYCLIN_A_B1_ASSOCIATED_EVENTS_DURING_G2_M_TRANSITION		15	0.400745	1.83987	0.0174081	0.0384578	1	10456	tags=93%, list=53%, signal=200%
RAO_BOUND_BY_SALL4	RAO_BOUND_BY_SALL4		203	0.112333	1.83929	0.0121457	0.038526	1	7484	tags=49%, list=38%, signal=79%
NGO_MALIGNANT_GLIOMA_1P_LOH	NGO_MALIGNANT_GLIOMA_1P_LOH		15	0.404733	1.83921	0.0162933	0.0384894	1	11686	tags=100%, list=60%, signal=247%
KEGG_PURINE_METABOLISM	KEGG_PURINE_METABOLISM		146	0.131431	1.83867	0.0102459	0.0385495	1	13030	tags=79%, list=66%, signal=235%
KEGG_P53_SIGNALING_PATHWAY	KEGG_P53_SIGNALING_PATHWAY		61	0.196611	1.83694	0.0059761	0.0388896	1	12559	tags=84%, list=64%, signal=232%
CAIRO_PML_TARGETS_BOUND_BY_MYC_UP	CAIRO_PML_TARGETS_BOUND_BY_MYC_UP		22	0.32535	1.83663	0.00982318	0.0389097	1	9677	tags=82%, list=49%, signal=161%
SANSOM_APC_TARGETS_REQUIRE_MYC	SANSOM_APC_TARGETS_REQUIRE_MYC		179	0.116879	1.83354	0.0134615	0.0394693	1	13951	tags=83%, list=71%, signal=283%
BARRIER_CANCER_RELAPSE_TUMOR_SAMPLE_UP	BARRIER_CANCER_RELAPSE_TUMOR_SAMPLE_UP		15	0.385812	1.83339	0.00858369	0.0394587	1	12057	tags=100%, list=61%, signal=259%
GENTILE_UV_RESPONSE_CLUSTER_D1	GENTILE_UV_RESPONSE_CLUSTER_D1		17	0.373937	1.83337	0.00773694	0.0394118	1	9982	tags=88%, list=51%, signal=179%
REACTOME_PIP3_ACTIVATES_AKT_SIGNALING	REACTOME_PIP3_ACTIVATES_AKT_SIGNALING		26	0.294382	1.83249	0.0140845	0.0395744	1	13853	tags=100%, list=71%, signal=340%
COLLIS_PRKDC_REGULATORS	COLLIS_PRKDC_REGULATORS		15	0.394727	1.83244	0.0100402	0.0395338	1	10574	tags=93%, list=54%, signal=202%
XU_HGF_TARGETS_INDUCED_BY_AKT1_48HR_DN	XU_HGF_TARGETS_INDUCED_BY_AKT1_48HR_DN		22	0.330558	1.83192	0.0159681	0.0395764	1	7791	tags=73%, list=40%, signal=120%
RIZ_ERYTHROID_DIFFERENTIATION	RIZ_ERYTHROID_DIFFERENTIATION		72	0.178902	1.83126	0.0190678	0.0396658	1	10946	tags=74%, list=56%, signal=166%
VANHARANTA_UTERINE_FIBROID_WITH_7Q_DELETION_DN	VANHARANTA_UTERINE_FIBROID_WITH_7Q_DELETION_DN		34	0.266643	1.82999	0.0157791	0.039932	1	11513	tags=85%, list=59%, signal=206%
KOKKINAKIS_METHIONINE_DEPRIVATION_96HR_DN	KOKKINAKIS_METHIONINE_DEPRIVATION_96HR_DN		68	0.184541	1.82934	0.0136719	0.040033	1	12839	tags=84%, list=65%, signal=242%
PID_FCER1_PATHWAY	PID_FCER1_PATHWAY		59	0.19672	1.82849	0.00592885	0.0402038	1	14443	tags=93%, list=74%, signal=352%
SHEPARD_CRUSH_AND_BURN_MUTANT_DN	SHEPARD_CRUSH_AND_BURN_MUTANT_DN		161	0.125024	1.8284	0.0160966	0.0401673	1	5610	tags=41%, list=29%, signal=57%
BIOCARTA_RARRXR_PATHWAY	BIOCARTA_RARRXR_PATHWAY		15	0.394574	1.82771	0.0170213	0.040299	1	10577	tags=93%, list=54%, signal=202%
FERNANDEZ_BOUND_BY_MYC	FERNANDEZ_BOUND_BY_MYC		170	0.120091	1.82707	0.0116505	0.0403726	1	14631	tags=86%, list=75%, signal=337%
TOOKER_GEMCITABINE_RESISTANCE_UP	TOOKER_GEMCITABINE_RESISTANCE_UP		70	0.187511	1.82396	0.0161943	0.0409683	1	12031	tags=80%, list=61%, signal=206%
BIOCARTA_BCELLSURVIVAL_PATHWAY	BIOCARTA_BCELLSURVIVAL_PATHWAY		16	0.378924	1.82278	0.0140562	0.0411876	1	10966	tags=94%, list=56%, signal=212%
REACTOME_CHROMOSOME_MAINTENANCE	REACTOME_CHROMOSOME_MAINTENANCE		105	0.153725	1.82115	0.0100402	0.0414975	1	12697	tags=80%, list=65%, signal=225%
REACTOME_METABOLISM_OF_CARBOHYDRATES	REACTOME_METABOLISM_OF_CARBOHYDRATES		217	0.10468	1.82097	0.0178571	0.0414936	1	15149	tags=88%, list=77%, signal=380%
GRAESSMANN_APOPTOSIS_BY_SERUM_DEPRIVATION_DN	GRAESSMANN_APOPTOSIS_BY_SERUM_DEPRIVATION_DN		205	0.10472	1.82051	0.0131291	0.0415422	1	16057	tags=92%, list=82%, signal=502%
NEMETH_INFLAMMATORY_RESPONSE_LPS_DN	NEMETH_INFLAMMATORY_RESPONSE_LPS_DN		31	0.28481	1.82044	0.0127389	0.0415078	1	9611	tags=77%, list=49%, signal=151%
BACOLOD_RESISTANCE_TO_ALKYLATING_AGENTS_DN	BACOLOD_RESISTANCE_TO_ALKYLATING_AGENTS_DN		53	0.214336	1.81973	0.0117188	0.0415892	1	11725	tags=81%, list=60%, signal=201%
PID_RETINOIC_ACID_PATHWAY	PID_RETINOIC_ACID_PATHWAY		29	0.275749	1.81757	0.0191939	0.0420552	1	12189	tags=90%, list=62%, signal=236%
ZHOU_TNF_SIGNALING_30MIN	ZHOU_TNF_SIGNALING_30MIN		50	0.217223	1.81755	0.00813008	0.042011	1	13408	tags=90%, list=68%, signal=283%
REACTOME_PHOSPHOLIPID_METABOLISM	REACTOME_PHOSPHOLIPID_METABOLISM		181	0.11658	1.81621	0.0237154	0.0422691	1	10959	tags=67%, list=56%, signal=151%
SASSON_RESPONSE_TO_GONADOTROPHINS_UP	SASSON_RESPONSE_TO_GONADOTROPHINS_UP		86	0.169179	1.81579	0.0121704	0.0423137	1	14035	tags=88%, list=72%, signal=309%
CHOI_ATL_STAGE_PREDICTOR	CHOI_ATL_STAGE_PREDICTOR		37	0.253831	1.81439	0.023622	0.042569	1	10938	tags=81%, list=56%, signal=183%
PID_P75_NTR_PATHWAY	PID_P75_NTR_PATHWAY		65	0.191336	1.81421	0.0180361	0.0425534	1	9842	tags=69%, list=50%, signal=138%
PAPASPYRIDONOS_UNSTABLE_ATEROSCLEROTIC_PLAQUE_UP	PAPASPYRIDONOS_UNSTABLE_ATEROSCLEROTIC_PLAQUE_UP		47	0.225371	1.81263	0.011976	0.0428636	1	10200	tags=74%, list=52%, signal=155%
REACTOME_SYNTHESIS_AND_INTERCONVERSION_OF_NUCLEOTIDE_DI_AND_TRIPHOSPHATES	REACTOME_SYNTHESIS_AND_INTERCONVERSION_OF_NUCLEOTIDE_DI_AND_TRIPHOSPHATES		15	0.384374	1.81186	0.011583	0.0429877	1	10777	tags=93%, list=55%, signal=207%
WANG_TARGETS_OF_MLL_CBP_FUSION_DN	WANG_TARGETS_OF_MLL_CBP_FUSION_DN		40	0.239653	1.81069	0.0195695	0.0431867	1	12476	tags=88%, list=64%, signal=240%
REACTOME_SIGNALING_BY_PDGF	REACTOME_SIGNALING_BY_PDGF		116	0.142942	1.81009	0.0136187	0.0432679	1	14127	tags=86%, list=72%, signal=306%
HIRSCH_CELLULAR_TRANSFORMATION_SIGNATURE_UP	HIRSCH_CELLULAR_TRANSFORMATION_SIGNATURE_UP		216	0.105614	1.8093	0.0159681	0.0433944	1	14211	tags=83%, list=72%, signal=297%
COLDREN_GEFITINIB_RESISTANCE_UP	COLDREN_GEFITINIB_RESISTANCE_UP		69	0.18441	1.8087	0.00934579	0.0434778	1	10897	tags=74%, list=56%, signal=166%
PID_TGFBR_PATHWAY	PID_TGFBR_PATHWAY		52	0.210799	1.80858	0.00788955	0.0434567	1	13987	tags=92%, list=71%, signal=321%
ZUCCHI_METASTASIS_UP	ZUCCHI_METASTASIS_UP		36	0.251659	1.80785	0.0174419	0.0435901	1	9787	tags=75%, list=50%, signal=149%
SASSON_RESPONSE_TO_FORSKOLIN_UP	SASSON_RESPONSE_TO_FORSKOLIN_UP		85	0.167797	1.80539	0.0133843	0.0440666	1	14035	tags=88%, list=72%, signal=309%
PHONG_TNF_RESPONSE_NOT_VIA_P38	PHONG_TNF_RESPONSE_NOT_VIA_P38		314	0.0876886	1.80534	0.014553	0.0440251	1	16179	tags=91%, list=82%, signal=511%
KEGG_FC_GAMMA_R_MEDIATED_PHAGOCYTOSIS	KEGG_FC_GAMMA_R_MEDIATED_PHAGOCYTOSIS		88	0.162227	1.80497	0.0133843	0.0440546	1	14446	tags=90%, list=74%, signal=339%
BIOCARTA_G1_PATHWAY	BIOCARTA_G1_PATHWAY		24	0.30323	1.80387	0.0141414	0.0442777	1	13679	tags=100%, list=70%, signal=330%
STEIN_ESR1_TARGETS	STEIN_ESR1_TARGETS		78	0.174851	1.80155	0.0175781	0.0447759	1	11173	tags=74%, list=57%, signal=172%
DACOSTA_UV_RESPONSE_VIA_ERCC3_TTD_UP	DACOSTA_UV_RESPONSE_VIA_ERCC3_TTD_UP		55	0.20274	1.80013	0.0147679	0.0450573	1	15298	tags=98%, list=78%, signal=444%
REACTOME_G1_S_SPECIFIC_TRANSCRIPTION	REACTOME_G1_S_SPECIFIC_TRANSCRIPTION		17	0.353667	1.79976	0.0162272	0.0451036	1	12688	tags=100%, list=65%, signal=283%
REACTOME_CONVERSION_FROM_APC_C_CDC20_TO_APC_C_CDH1_IN_LATE_ANAPHASE	REACTOME_CONVERSION_FROM_APC_C_CDC20_TO_APC_C_CDH1_IN_LATE_ANAPHASE		16	0.376148	1.79586	0.0159046	0.0460309	1	9794	tags=88%, list=50%, signal=175%
FAELT_B_CLL_WITH_VH3_21_UP	FAELT_B_CLL_WITH_VH3_21_UP		41	0.233264	1.79516	0.019802	0.0461768	1	14097	tags=95%, list=72%, signal=337%
BRACHAT_RESPONSE_TO_CAMPTOTHECIN_UP	BRACHAT_RESPONSE_TO_CAMPTOTHECIN_UP		24	0.306004	1.79254	0.0107991	0.0467585	1	12807	tags=96%, list=65%, signal=276%
LIN_NPAS4_TARGETS_UP	LIN_NPAS4_TARGETS_UP		137	0.131174	1.79044	0.0119284	0.0472245	1	12196	tags=75%, list=62%, signal=197%
FARMER_BREAST_CANCER_APOCRINE_VS_BASAL	FARMER_BREAST_CANCER_APOCRINE_VS_BASAL		307	0.0910639	1.79034	0.0232108	0.0471979	1	14731	tags=84%, list=75%, signal=332%
WANG_TARGETS_OF_MLL_CBP_FUSION_UP	WANG_TARGETS_OF_MLL_CBP_FUSION_UP		38	0.242279	1.79007	0.0164271	0.0472085	1	12295	tags=87%, list=63%, signal=232%
DACOSTA_UV_RESPONSE_VIA_ERCC3_XPCS_DN	DACOSTA_UV_RESPONSE_VIA_ERCC3_XPCS_DN		80	0.17048	1.79001	0.0212766	0.0471565	1	12611	tags=81%, list=64%, signal=226%
PID_TNF_PATHWAY	PID_TNF_PATHWAY		44	0.2297	1.78983	0.0153551	0.0471496	1	9327	tags=70%, list=48%, signal=134%
CHUNG_BLISTER_CYTOTOXICITY_UP	CHUNG_BLISTER_CYTOTOXICITY_UP		113	0.144029	1.78802	0.026971	0.0475862	1	11776	tags=74%, list=60%, signal=185%
JIANG_AGING_CEREBRAL_CORTEX_DN	JIANG_AGING_CEREBRAL_CORTEX_DN		50	0.211328	1.78506	0.0136452	0.0482758	1	12346	tags=84%, list=63%, signal=226%
BIOCARTA_PPARA_PATHWAY	BIOCARTA_PPARA_PATHWAY		53	0.207553	1.78429	0.0152381	0.0483934	1	10747	tags=75%, list=55%, signal=166%
ELLWOOD_MYC_TARGETS_DN	ELLWOOD_MYC_TARGETS_DN		35	0.251978	1.78405	0.0138614	0.0483982	1	10201	tags=77%, list=52%, signal=160%
REACTOME_PRE_NOTCH_EXPRESSION_AND_PROCESSING	REACTOME_PRE_NOTCH_EXPRESSION_AND_PROCESSING		37	0.245716	1.78235	0.00831601	0.0488102	1	12688	tags=89%, list=65%, signal=252%
RASHI_RESPONSE_TO_IONIZING_RADIATION_2	RASHI_RESPONSE_TO_IONIZING_RADIATION_2		117	0.141241	1.78181	0.0177866	0.0489075	1	12674	tags=79%, list=65%, signal=221%
IGARASHI_ATF4_TARGETS_DN	IGARASHI_ATF4_TARGETS_DN		81	0.1679	1.78028	0.00992064	0.0492636	1	12707	tags=81%, list=65%, signal=230%
BIOCARTA_ACTINY_PATHWAY	BIOCARTA_ACTINY_PATHWAY		19	0.339952	1.77891	0.0184426	0.0495604	1	10892	tags=89%, list=56%, signal=201%
DAZARD_UV_RESPONSE_CLUSTER_G3	DAZARD_UV_RESPONSE_CLUSTER_G3		15	0.37244	1.77855	0.0244399	0.0496056	1	4470	tags=60%, list=23%, signal=78%
LIANG_HEMATOPOIESIS_STEM_CELL_NUMBER_SMALL_VS_HUGE_DN	LIANG_HEMATOPOIESIS_STEM_CELL_NUMBER_SMALL_VS_HUGE_DN		31	0.264189	1.77763	0.0238569	0.0498167	1	11281	tags=84%, list=57%, signal=197%
REACTOME_FORMATION_OF_THE_HIV1_EARLY_ELONGATION_COMPLEX	REACTOME_FORMATION_OF_THE_HIV1_EARLY_ELONGATION_COMPLEX		25	0.29631	1.77722	0.0261569	0.0498564	1	13030	tags=96%, list=66%, signal=285%
LIU_NASOPHARYNGEAL_CARCINOMA	LIU_NASOPHARYNGEAL_CARCINOMA		61	0.198145	1.77637	0.013834	0.0500242	1	12529	tags=84%, list=64%, signal=231%
WANG_CISPLATIN_RESPONSE_AND_XPC_UP	WANG_CISPLATIN_RESPONSE_AND_XPC_UP		180	0.115684	1.77621	0.0196464	0.0500137	1	12467	tags=75%, list=64%, signal=204%
REACTOME_RNA_POL_III_TRANSCRIPTION	REACTOME_RNA_POL_III_TRANSCRIPTION		32	0.260081	1.77523	0.0301205	0.0502125	1	9621	tags=75%, list=49%, signal=147%
NADLER_HYPERGLYCEMIA_AT_OBESITY	NADLER_HYPERGLYCEMIA_AT_OBESITY		51	0.205669	1.7743	0.0163599	0.0504259	1	11749	tags=80%, list=60%, signal=200%
KEGG_RENAL_CELL_CARCINOMA	KEGG_RENAL_CELL_CARCINOMA		64	0.190024	1.77364	0.00788955	0.0505631	1	12226	tags=81%, list=62%, signal=215%
FOSTER_TOLERANT_MACROPHAGE_DN	FOSTER_TOLERANT_MACROPHAGE_DN		382	0.0800654	1.7712	0.0040404	0.0511207	1	11198	tags=65%, list=57%, signal=148%
BOYLAN_MULTIPLE_MYELOMA_C_CLUSTER_DN	BOYLAN_MULTIPLE_MYELOMA_C_CLUSTER_DN		27	0.291885	1.76875	0.015625	0.0517243	1	8088	tags=70%, list=41%, signal=120%
AZARE_STAT3_TARGETS	AZARE_STAT3_TARGETS		23	0.305253	1.7683	0.0175439	0.051795	1	8520	tags=74%, list=43%, signal=130%
REACTOME_APC_C_CDC20_MEDIATED_DEGRADATION_OF_CYCLIN_B	REACTOME_APC_C_CDC20_MEDIATED_DEGRADATION_OF_CYCLIN_B		19	0.343279	1.76729	0.0170132	0.0520199	1	9794	tags=84%, list=50%, signal=168%
SHAFFER_IRF4_TARGETS_IN_ACTIVATED_DENDRITIC_CELL	SHAFFER_IRF4_TARGETS_IN_ACTIVATED_DENDRITIC_CELL		58	0.198404	1.76613	0.0160321	0.0522799	1	9312	tags=67%, list=47%, signal=128%
ST_JNK_MAPK_PATHWAY	ST_JNK_MAPK_PATHWAY		38	0.240982	1.76574	0.0140281	0.0523108	1	11804	tags=84%, list=60%, signal=211%
BIOCARTA_MCM_PATHWAY	BIOCARTA_MCM_PATHWAY		17	0.353106	1.76559	0.0179283	0.0522894	1	12699	tags=100%, list=65%, signal=283%
WINTER_HYPOXIA_UP	WINTER_HYPOXIA_UP		77	0.170302	1.76378	0.0221328	0.0526976	1	13490	tags=86%, list=69%, signal=273%
MATSUDA_NATURAL_KILLER_DIFFERENTIATION	MATSUDA_NATURAL_KILLER_DIFFERENTIATION		422	0.0757253	1.76122	0.0155945	0.053327	1	16773	tags=93%, list=85%, signal=626%
GRUETZMANN_PANCREATIC_CANCER_DN	GRUETZMANN_PANCREATIC_CANCER_DN		188	0.1089	1.761	0.0141988	0.0533348	1	16253	tags=94%, list=83%, signal=540%
DAIRKEE_CANCER_PRONE_RESPONSE_BPA	DAIRKEE_CANCER_PRONE_RESPONSE_BPA		49	0.212765	1.76086	0.0314961	0.0532992	1	13455	tags=90%, list=69%, signal=285%
YUAN_ZNF143_PARTNERS	YUAN_ZNF143_PARTNERS		21	0.316812	1.75806	0.0193798	0.0540353	1	11543	tags=90%, list=59%, signal=219%
GARGALOVIC_RESPONSE_TO_OXIDIZED_PHOSPHOLIPIDS_BLACK_UP	GARGALOVIC_RESPONSE_TO_OXIDIZED_PHOSPHOLIPIDS_BLACK_UP		32	0.268588	1.75788	0.0141129	0.0540135	1	11294	tags=84%, list=58%, signal=198%
REACTOME_PRE_NOTCH_TRANSCRIPTION_AND_TRANSLATION	REACTOME_PRE_NOTCH_TRANSCRIPTION_AND_TRANSLATION		22	0.308252	1.75524	0.0202429	0.0547571	1	12688	tags=95%, list=65%, signal=270%
HEIDENBLAD_AMPLICON_8Q24_UP	HEIDENBLAD_AMPLICON_8Q24_UP		33	0.255733	1.75313	0.0199203	0.055317	1	11639	tags=85%, list=59%, signal=208%
BURTON_ADIPOGENESIS_PEAK_AT_8HR	BURTON_ADIPOGENESIS_PEAK_AT_8HR		36	0.240666	1.75289	0.0139721	0.0553453	1	14363	tags=97%, list=73%, signal=362%
LI_AMPLIFIED_IN_LUNG_CANCER	LI_AMPLIFIED_IN_LUNG_CANCER		159	0.120476	1.75282	0.0182186	0.0552976	1	15179	tags=89%, list=77%, signal=391%
REACTOME_RNA_POL_I_TRANSCRIPTION_TERMINATION	REACTOME_RNA_POL_I_TRANSCRIPTION_TERMINATION		17	0.352326	1.75009	0.0281385	0.0560692	1	11560	tags=94%, list=59%, signal=229%
YU_BAP1_TARGETS	YU_BAP1_TARGETS		29	0.275665	1.74986	0.0141988	0.0560754	1	11514	tags=86%, list=59%, signal=208%
SWEET_KRAS_ONCOGENIC_SIGNATURE	SWEET_KRAS_ONCOGENIC_SIGNATURE		83	0.165695	1.7496	0.0133333	0.0560825	1	12838	tags=82%, list=65%, signal=236%
REACTOME_ASPARAGINE_N_LINKED_GLYCOSYLATION	REACTOME_ASPARAGINE_N_LINKED_GLYCOSYLATION		77	0.174214	1.74904	0.0123711	0.0561967	1	12649	tags=82%, list=64%, signal=229%
ENK_UV_RESPONSE_EPIDERMIS_UP	ENK_UV_RESPONSE_EPIDERMIS_UP		265	0.0921476	1.74807	0.0237624	0.0564364	1	14506	tags=83%, list=74%, signal=314%
VISALA_RESPONSE_TO_HEAT_SHOCK_AND_AGING_UP	VISALA_RESPONSE_TO_HEAT_SHOCK_AND_AGING_UP		15	0.377672	1.74777	0.0295276	0.0564661	1	8292	tags=80%, list=42%, signal=138%
ZHAN_MULTIPLE_MYELOMA_MS_DN	ZHAN_MULTIPLE_MYELOMA_MS_DN		38	0.244832	1.74729	0.0102669	0.0565442	1	12245	tags=87%, list=62%, signal=231%
BURTON_ADIPOGENESIS_9	BURTON_ADIPOGENESIS_9		80	0.165779	1.7467	0.0177515	0.0566549	1	11967	tags=78%, list=61%, signal=198%
KEGG_VEGF_SIGNALING_PATHWAY	KEGG_VEGF_SIGNALING_PATHWAY		68	0.17907	1.74566	0.0191489	0.0569286	1	14966	tags=94%, list=76%, signal=395%
WANG_PROSTATE_CANCER_ANDROGEN_INDEPENDENT	WANG_PROSTATE_CANCER_ANDROGEN_INDEPENDENT		57	0.197956	1.74522	0.0197628	0.0569819	1	14716	tags=95%, list=75%, signal=378%
MANN_RESPONSE_TO_AMIFOSTINE_UP	MANN_RESPONSE_TO_AMIFOSTINE_UP		19	0.333302	1.74162	0.0160966	0.0579827	1	7924	tags=74%, list=40%, signal=123%
BILANGES_RAPAMYCIN_SENSITIVE_GENES	BILANGES_RAPAMYCIN_SENSITIVE_GENES		38	0.242729	1.74072	0.010661	0.0581635	1	10737	tags=79%, list=55%, signal=174%
REACTOME_TRANS_GOLGI_NETWORK_VESICLE_BUDDING	REACTOME_TRANS_GOLGI_NETWORK_VESICLE_BUDDING		55	0.199916	1.73876	0.0186335	0.0586381	1	12499	tags=84%, list=64%, signal=230%
GENTILE_UV_RESPONSE_CLUSTER_D7	GENTILE_UV_RESPONSE_CLUSTER_D7		36	0.248047	1.73588	0.0362595	0.0594703	1	11493	tags=83%, list=59%, signal=201%
DELPUECH_FOXO3_TARGETS_DN	DELPUECH_FOXO3_TARGETS_DN		36	0.245699	1.73578	0.0335821	0.0594471	1	11539	tags=83%, list=59%, signal=202%
NAGASHIMA_NRG1_SIGNALING_UP	NAGASHIMA_NRG1_SIGNALING_UP		165	0.115422	1.73269	0.0172745	0.0603528	1	7743	tags=51%, list=39%, signal=83%
ROESSLER_LIVER_CANCER_METASTASIS_DN	ROESSLER_LIVER_CANCER_METASTASIS_DN		42	0.224398	1.73212	0.0155039	0.0604499	1	12892	tags=88%, list=66%, signal=256%
MCBRYAN_PUBERTAL_BREAST_6_7WK_UP	MCBRYAN_PUBERTAL_BREAST_6_7WK_UP		182	0.109214	1.73073	0.0181818	0.0608167	1	8442	tags=54%, list=43%, signal=94%
REACTOME_FORMATION_OF_TRANSCRIPTION_COUPLED_NER_TC_NER_REPAIR_COMPLEX	REACTOME_FORMATION_OF_TRANSCRIPTION_COUPLED_NER_TC_NER_REPAIR_COMPLEX		26	0.297865	1.73026	0.0248963	0.0608874	1	13030	tags=96%, list=66%, signal=286%
BIOCARTA_IL6_PATHWAY	BIOCARTA_IL6_PATHWAY		22	0.306007	1.72981	0.020202	0.0609555	1	12732	tags=95%, list=65%, signal=272%
KANG_DOXORUBICIN_RESISTANCE_DN	KANG_DOXORUBICIN_RESISTANCE_DN		17	0.351648	1.72843	0.0161616	0.0613497	1	10419	tags=88%, list=53%, signal=188%
GARCIA_TARGETS_OF_FLI1_AND_DAX1_UP	GARCIA_TARGETS_OF_FLI1_AND_DAX1_UP		52	0.19946	1.72687	0.0225873	0.0617484	1	15341	tags=98%, list=78%, signal=448%
REACTOME_G0_AND_EARLY_G1	REACTOME_G0_AND_EARLY_G1		22	0.308556	1.72642	0.0264766	0.0618348	1	13574	tags=100%, list=69%, signal=324%
WINTER_HYPOXIA_METAGENE	WINTER_HYPOXIA_METAGENE		217	0.101589	1.72623	0.0144033	0.0618289	1	12044	tags=71%, list=61%, signal=183%
LIU_COMMON_CANCER_GENES	LIU_COMMON_CANCER_GENES		63	0.181785	1.72539	0.019685	0.0620432	1	13263	tags=86%, list=68%, signal=264%
HOSHIDA_LIVER_CANCER_SUBCLASS_S1	HOSHIDA_LIVER_CANCER_SUBCLASS_S1		217	0.102892	1.72496	0.0300601	0.0621179	1	15455	tags=89%, list=79%, signal=414%
PID_AVB3_OPN_PATHWAY	PID_AVB3_OPN_PATHWAY		30	0.262788	1.72338	0.0184426	0.0625807	1	13165	tags=93%, list=67%, signal=283%
REACTOME_SIGNALING_BY_TGF_BETA_RECEPTOR_COMPLEX	REACTOME_SIGNALING_BY_TGF_BETA_RECEPTOR_COMPLEX		56	0.199577	1.72266	0.0214425	0.0627296	1	13264	tags=88%, list=68%, signal=269%
ELVIDGE_HYPOXIA_DN	ELVIDGE_HYPOXIA_DN		129	0.130894	1.72018	0.0224033	0.0634869	1	16614	tags=98%, list=85%, signal=633%
LEE_AGING_NEOCORTEX_DN	LEE_AGING_NEOCORTEX_DN		67	0.180861	1.71993	0.0172414	0.0635167	1	11399	tags=76%, list=58%, signal=181%
MORI_PRE_BI_LYMPHOCYTE_DN	MORI_PRE_BI_LYMPHOCYTE_DN		70	0.174473	1.7196	0.0265849	0.0635423	1	8081	tags=59%, list=41%, signal=99%
DER_IFN_GAMMA_RESPONSE_UP	DER_IFN_GAMMA_RESPONSE_UP		64	0.182135	1.71847	0.027668	0.0638436	1	8701	tags=63%, list=44%, signal=112%
PURBEY_TARGETS_OF_CTBP1_AND_SATB1_DN	PURBEY_TARGETS_OF_CTBP1_AND_SATB1_DN		164	0.113445	1.71789	0.0133843	0.0639617	1	15859	tags=92%, list=81%, signal=476%
OUELLET_CULTURED_OVARIAN_CANCER_INVASIVE_VS_LMP_UP	OUELLET_CULTURED_OVARIAN_CANCER_INVASIVE_VS_LMP_UP		65	0.179198	1.71579	0.0201613	0.0645932	1	14004	tags=89%, list=71%, signal=311%
MA_MYELOID_DIFFERENTIATION_DN	MA_MYELOID_DIFFERENTIATION_DN		41	0.224007	1.71564	0.0307377	0.0645776	1	10928	tags=78%, list=56%, signal=176%
PID_HDAC_CLASSI_PATHWAY	PID_HDAC_CLASSI_PATHWAY		65	0.179384	1.71534	0.0238569	0.0646267	1	12189	tags=80%, list=62%, signal=210%
MSI2_OVEREXPR_UP	MSI2_OVEREXPR_UP		27	0.279938	1.71507	0.032882	0.0646663	1	5415	tags=56%, list=28%, signal=77%
BIOCARTA_AKT_PATHWAY	BIOCARTA_AKT_PATHWAY		21	0.319464	1.71392	0.0259481	0.0649906	1	11491	tags=90%, list=59%, signal=218%
FULCHER_INFLAMMATORY_RESPONSE_LECTIN_VS_LPS_UP	FULCHER_INFLAMMATORY_RESPONSE_LECTIN_VS_LPS_UP		497	0.0668008	1.71355	0.0213178	0.06505	1	12264	tags=69%, list=62%, signal=179%
ST_PHOSPHOINOSITIDE_3_KINASE_PATHWAY	ST_PHOSPHOINOSITIDE_3_KINASE_PATHWAY		36	0.236581	1.71278	0.0246407	0.0652372	1	14443	tags=97%, list=74%, signal=368%
ZHANG_BREAST_CANCER_PROGENITORS_DN	ZHANG_BREAST_CANCER_PROGENITORS_DN		130	0.129633	1.71106	0.016	0.0657425	1	11661	tags=72%, list=59%, signal=177%
ZHU_CMV_8_HR_UP	ZHU_CMV_8_HR_UP		42	0.223675	1.71093	0.018595	0.0657161	1	8234	tags=64%, list=42%, signal=111%
SOMERVAILLE.LOWLSCVSHSC_DN	SOMERVAILLE.LOWLSCVSHSC_DN		58	0.194589	1.71063	0.0230608	0.0657415	1	7695	tags=59%, list=39%, signal=96%
GARGALOVIC_RESPONSE_TO_OXIDIZED_PHOSPHOLIPIDS_YELLOW_UP	GARGALOVIC_RESPONSE_TO_OXIDIZED_PHOSPHOLIPIDS_YELLOW_UP		29	0.273419	1.70956	0.0297619	0.0660025	1	11558	tags=86%, list=59%, signal=209%
LUI_THYROID_CANCER_CLUSTER_3	LUI_THYROID_CANCER_CLUSTER_3		26	0.277917	1.70758	0.0431373	0.0666093	1	10402	tags=81%, list=53%, signal=172%
CREIGHTON_ENDOCRINE_THERAPY_RESISTANCE_2	CREIGHTON_ENDOCRINE_THERAPY_RESISTANCE_2		366	0.0770561	1.70668	0.0250482	0.066895	1	16208	tags=90%, list=83%, signal=508%
ACEVEDO_LIVER_CANCER_DN	ACEVEDO_LIVER_CANCER_DN		463	0.0674753	1.70612	0.0134357	0.0670093	1	15871	tags=87%, list=81%, signal=447%
AFFAR_YY1_TARGETS_DN	AFFAR_YY1_TARGETS_DN		210	0.10305	1.70489	0.0348162	0.0674015	1	13510	tags=79%, list=69%, signal=251%
MEINHOLD_OVARIAN_CANCER_LOW_GRADE_DN	MEINHOLD_OVARIAN_CANCER_LOW_GRADE_DN		20	0.314732	1.70363	0.0362903	0.0677627	1	11490	tags=90%, list=59%, signal=217%
REACTOME_GAB1_SIGNALOSOME	REACTOME_GAB1_SIGNALOSOME		35	0.237272	1.70359	0.032	0.0677086	1	13853	tags=94%, list=71%, signal=320%
REACTOME_ACTIVATED_TLR4_SIGNALLING	REACTOME_ACTIVATED_TLR4_SIGNALLING		87	0.155141	1.70303	0.0248447	0.0678132	1	13659	tags=85%, list=70%, signal=279%
KOYAMA_SEMA3B_TARGETS_UP	KOYAMA_SEMA3B_TARGETS_UP		239	0.0937923	1.70275	0.0257937	0.0678308	1	15505	tags=88%, list=79%, signal=416%
KEGG_PEROXISOME	KEGG_PEROXISOME		75	0.168911	1.70257	0.0218254	0.06782	1	14227	tags=89%, list=73%, signal=324%
IWANAGA_E2F1_TARGETS_INDUCED_BY_SERUM	IWANAGA_E2F1_TARGETS_INDUCED_BY_SERUM		29	0.266241	1.70254	0.0310078	0.0677552	1	11022	tags=83%, list=56%, signal=189%
HOSHIDA_LIVER_CANCER_SURVIVAL_DN	HOSHIDA_LIVER_CANCER_SURVIVAL_DN		106	0.141897	1.7023	0.0208768	0.0677539	1	14446	tags=88%, list=74%, signal=331%
ZWANG_CLASS_1_TRANSIENTLY_INDUCED_BY_EGF	ZWANG_CLASS_1_TRANSIENTLY_INDUCED_BY_EGF		441	0.0713789	1.70195	0.0269231	0.0678036	1	15761	tags=87%, list=80%, signal=434%
TCGA_GLIOBLASTOMA_COPY_NUMBER_DN	TCGA_GLIOBLASTOMA_COPY_NUMBER_DN		22	0.302246	1.70109	0.0391389	0.0680159	1	7454	tags=68%, list=38%, signal=110%
PID_EPHB_FWD_PATHWAY	PID_EPHB_FWD_PATHWAY		38	0.232382	1.70002	0.0254403	0.0683203	1	14038	tags=95%, list=72%, signal=332%
KENNY_CTNNB1_TARGETS_UP	KENNY_CTNNB1_TARGETS_UP		43	0.217222	1.69959	0.0254902	0.0684168	1	11718	tags=81%, list=60%, signal=202%
BONOME_OVARIAN_CANCER_SURVIVAL_OPTIMAL_DEBULKING	BONOME_OVARIAN_CANCER_SURVIVAL_OPTIMAL_DEBULKING		213	0.101487	1.69897	0.0296443	0.0685574	1	16823	tags=96%, list=86%, signal=664%
YAGI_AML_RELAPSE_PROGNOSIS	YAGI_AML_RELAPSE_PROGNOSIS		31	0.25883	1.69824	0.0309278	0.068706	1	12019	tags=87%, list=61%, signal=224%
ST_P38_MAPK_PATHWAY	ST_P38_MAPK_PATHWAY		36	0.237892	1.69733	0.0247423	0.0689484	1	12237	tags=86%, list=62%, signal=228%
LAU_APOPTOSIS_CDKN2A_UP	LAU_APOPTOSIS_CDKN2A_UP		53	0.19759	1.69732	0.0332031	0.0688857	1	9461	tags=68%, list=48%, signal=131%
PID_HIF1_TFPATHWAY	PID_HIF1_TFPATHWAY		64	0.178521	1.69665	0.0376984	0.0690468	1	12451	tags=81%, list=63%, signal=222%
ZHANG_RESPONSE_TO_IKK_INHIBITOR_AND_TNF_DN	ZHANG_RESPONSE_TO_IKK_INHIBITOR_AND_TNF_DN		91	0.150389	1.69615	0.024	0.0691337	1	6334	tags=47%, list=32%, signal=69%
APPIERTO_RESPONSE_TO_FENRETINIDE_UP	APPIERTO_RESPONSE_TO_FENRETINIDE_UP		36	0.240653	1.69552	0.0275049	0.0692873	1	6187	tags=56%, list=32%, signal=81%
MARTORIATI_MDM4_TARGETS_FETAL_LIVER_UP	MARTORIATI_MDM4_TARGETS_FETAL_LIVER_UP		195	0.104332	1.6954	0.0258964	0.0692525	1	14878	tags=86%, list=76%, signal=353%
REACTOME_ELONGATION_ARREST_AND_RECOVERY	REACTOME_ELONGATION_ARREST_AND_RECOVERY		22	0.298971	1.69454	0.0190678	0.0694911	1	11086	tags=86%, list=56%, signal=198%
ZHONG_SECRETOME_OF_LUNG_CANCER_AND_MACROPHAGE	ZHONG_SECRETOME_OF_LUNG_CANCER_AND_MACROPHAGE		69	0.172212	1.69447	0.0320641	0.0694388	1	15117	tags=94%, list=77%, signal=409%
BIOCARTA_EGF_PATHWAY	BIOCARTA_EGF_PATHWAY		31	0.252297	1.69409	0.0357853	0.0694839	1	14046	tags=97%, list=72%, signal=340%
FOSTER_KDM1A_TARGETS_DN	FOSTER_KDM1A_TARGETS_DN		177	0.11056	1.69346	0.022541	0.0696218	1	16696	tags=96%, list=85%, signal=638%
DER_IFN_ALPHA_RESPONSE_UP	DER_IFN_ALPHA_RESPONSE_UP		66	0.176345	1.69163	0.0340909	0.0702106	1	14092	tags=89%, list=72%, signal=316%
PID_P53_DOWNSTREAM_PATHWAY	PID_P53_DOWNSTREAM_PATHWAY		121	0.129022	1.69057	0.0122449	0.0705092	1	9808	tags=63%, list=50%, signal=125%
PRAMOONJAGO_SOX4_TARGETS_UP	PRAMOONJAGO_SOX4_TARGETS_UP		51	0.204605	1.69045	0.0172745	0.0704812	1	9846	tags=71%, list=50%, signal=141%
SCIBETTA_KDM5B_TARGETS_UP	SCIBETTA_KDM5B_TARGETS_UP		15	0.360771	1.68877	0.0339321	0.0709763	1	12548	tags=100%, list=64%, signal=277%
SIG_INSULIN_RECEPTOR_PATHWAY_IN_CARDIAC_MYOCYTES	SIG_INSULIN_RECEPTOR_PATHWAY_IN_CARDIAC_MYOCYTES		48	0.206485	1.68661	0.0257937	0.0717013	1	13536	tags=90%, list=69%, signal=288%
KEGG_VASOPRESSIN_REGULATED_WATER_REABSORPTION	KEGG_VASOPRESSIN_REGULATED_WATER_REABSORPTION		40	0.225617	1.68524	0.0223881	0.0721564	1	10298	tags=75%, list=52%, signal=158%
GRABARCZYK_BCL11B_TARGETS_UP	GRABARCZYK_BCL11B_TARGETS_UP		70	0.172867	1.68134	0.0262097	0.0734668	1	12037	tags=79%, list=61%, signal=203%
YANG_MUC2_TARGETS_DUODENUM_6MO_DN	YANG_MUC2_TARGETS_DUODENUM_6MO_DN		15	0.369349	1.68059	0.0253906	0.0736459	1	7147	tags=73%, list=36%, signal=115%
BRUINS_UVC_RESPONSE_VIA_TP53_GROUP_B	BRUINS_UVC_RESPONSE_VIA_TP53_GROUP_B		477	0.0675822	1.68008	0.0376238	0.0737436	1	15037	tags=83%, list=77%, signal=347%
FARMER_BREAST_CANCER_APOCRINE_VS_LUMINAL	FARMER_BREAST_CANCER_APOCRINE_VS_LUMINAL		304	0.0849357	1.67956	0.0288066	0.0738193	1	15851	tags=89%, list=81%, signal=457%
FAELT_B_CLL_WITH_VH_REARRANGEMENTS_DN	FAELT_B_CLL_WITH_VH_REARRANGEMENTS_DN		44	0.216574	1.67952	0.0269231	0.0737646	1	9584	tags=70%, list=49%, signal=137%
PID_CIRCADIAN_PATHWAY	PID_CIRCADIAN_PATHWAY		15	0.357273	1.67209	0.0260521	0.0764961	1	8692	tags=80%, list=44%, signal=144%
REACTOME_PI3K_AKT_ACTIVATION	REACTOME_PI3K_AKT_ACTIVATION		35	0.237272	1.66963	0.022449	0.0773613	1	13853	tags=94%, list=71%, signal=320%
PENG_RAPAMYCIN_RESPONSE_UP	PENG_RAPAMYCIN_RESPONSE_UP		178	0.108096	1.66936	0.0271318	0.0773741	1	15205	tags=88%, list=77%, signal=388%
LIU_SOX4_TARGETS_UP	LIU_SOX4_TARGETS_UP		121	0.127912	1.66929	0.0335968	0.0773239	1	10154	tags=64%, list=52%, signal=133%
YIH_RESPONSE_TO_ARSENITE_C1	YIH_RESPONSE_TO_ARSENITE_C1		23	0.296597	1.66779	0.0422535	0.0778656	1	10396	tags=83%, list=53%, signal=175%
SRC_BILD	SRC_BILD		41	0.221187	1.66746	0.0290698	0.0779183	1	10026	tags=73%, list=51%, signal=149%
BROWNE_HCMV_INFECTION_30MIN_DN	BROWNE_HCMV_INFECTION_30MIN_DN		125	0.129612	1.66673	0.0289575	0.0781521	1	5478	tags=41%, list=28%, signal=56%
REACTOME_SIGNALING_BY_NOTCH	REACTOME_SIGNALING_BY_NOTCH		93	0.14977	1.66656	0.0403071	0.0781442	1	12688	tags=80%, list=65%, signal=224%
MARKEY_RB1_CHRONIC_LOF_UP	MARKEY_RB1_CHRONIC_LOF_UP		104	0.140594	1.66527	0.038	0.0786076	1	11972	tags=75%, list=61%, signal=191%
PURBEY_TARGETS_OF_CTBP1_NOT_SATB1_DN	PURBEY_TARGETS_OF_CTBP1_NOT_SATB1_DN		393	0.0728621	1.665	0.0357143	0.0786421	1	11580	tags=66%, list=59%, signal=158%
HAHTOLA_MYCOSIS_FUNGOIDES_SKIN_DN	HAHTOLA_MYCOSIS_FUNGOIDES_SKIN_DN		24	0.28791	1.66426	0.0441459	0.0788667	1	5803	tags=58%, list=30%, signal=83%
JIANG_AGING_HYPOTHALAMUS_DN	JIANG_AGING_HYPOTHALAMUS_DN		38	0.230453	1.66403	0.0375235	0.0788894	1	13043	tags=89%, list=66%, signal=266%
RUTELLA_RESPONSE_TO_HGF_DN	RUTELLA_RESPONSE_TO_HGF_DN		222	0.0955684	1.66152	0.043299	0.0797526	1	16442	tags=93%, list=84%, signal=569%
LINDSTEDT_DENDRITIC_CELL_MATURATION_B	LINDSTEDT_DENDRITIC_CELL_MATURATION_B		50	0.199491	1.65895	0.0481928	0.0807618	1	9438	tags=68%, list=48%, signal=131%
AMIT_EGF_RESPONSE_60_HELA	AMIT_EGF_RESPONSE_60_HELA		41	0.215676	1.65666	0.0289256	0.0815844	1	3912	tags=41%, list=20%, signal=52%
RASHI_RESPONSE_TO_IONIZING_RADIATION_4	RASHI_RESPONSE_TO_IONIZING_RADIATION_4		51	0.191351	1.65505	0.0367347	0.0821641	1	12414	tags=82%, list=63%, signal=224%
PID_CASPASE_PATHWAY	PID_CASPASE_PATHWAY		48	0.198008	1.65461	0.0345528	0.0822514	1	9205	tags=67%, list=47%, signal=125%
LEE_LIVER_CANCER_MYC_DN	LEE_LIVER_CANCER_MYC_DN		53	0.196547	1.65382	0.0330097	0.0824614	1	2817	tags=34%, list=14%, signal=40%
GRAHAM_CML_QUIESCENT_VS_NORMAL_QUIESCENT_UP	GRAHAM_CML_QUIESCENT_VS_NORMAL_QUIESCENT_UP		76	0.159126	1.65345	0.0413223	0.0825023	1	13155	tags=83%, list=67%, signal=251%
KUROKAWA_LIVER_CANCER_CHEMOTHERAPY_DN	KUROKAWA_LIVER_CANCER_CHEMOTHERAPY_DN		37	0.224759	1.65167	0.032197	0.0831379	1	9386	tags=70%, list=48%, signal=134%
KEGG_FC_EPSILON_RI_SIGNALING_PATHWAY	KEGG_FC_EPSILON_RI_SIGNALING_PATHWAY		72	0.163615	1.65155	0.026465	0.0831072	1	15333	tags=94%, list=78%, signal=430%
NAKAMURA_CANCER_MICROENVIRONMENT_DN	NAKAMURA_CANCER_MICROENVIRONMENT_DN		42	0.216062	1.6461	0.0390947	0.0852511	1	12588	tags=86%, list=64%, signal=239%
GRAHAM_CML_QUIESCENT_VS_NORMAL_DIVIDING_UP	GRAHAM_CML_QUIESCENT_VS_NORMAL_DIVIDING_UP		44	0.211117	1.64432	0.0399202	0.0859412	1	6569	tags=55%, list=33%, signal=82%
WARTERS_IR_RESPONSE_5GY	WARTERS_IR_RESPONSE_5GY		37	0.230334	1.644	0.0330578	0.0859602	1	5034	tags=49%, list=26%, signal=65%
AMIT_SERUM_RESPONSE_40_MCF10A	AMIT_SERUM_RESPONSE_40_MCF10A		31	0.244334	1.64323	0.027833	0.0861995	1	5973	tags=55%, list=30%, signal=79%
KEGG_AMINO_SUGAR_AND_NUCLEOTIDE_SUGAR_METABOLISM	KEGG_AMINO_SUGAR_AND_NUCLEOTIDE_SUGAR_METABOLISM		41	0.216134	1.64235	0.0349076	0.0864945	1	12518	tags=85%, list=64%, signal=235%
CHESLER_BRAIN_HIGHEST_GENETIC_VARIANCE	CHESLER_BRAIN_HIGHEST_GENETIC_VARIANCE		31	0.247499	1.63911	0.0412574	0.0877999	1	13507	tags=94%, list=69%, signal=300%
PID_CDC42_PATHWAY	PID_CDC42_PATHWAY		65	0.174131	1.63859	0.031068	0.0879439	1	14405	tags=91%, list=73%, signal=340%
FARMER_BREAST_CANCER_CLUSTER_5	FARMER_BREAST_CANCER_CLUSTER_5		17	0.328783	1.63681	0.0341365	0.0886824	1	9713	tags=82%, list=49%, signal=163%
PID_ERBB1_RECEPTOR_PROXIMAL_PATHWAY	PID_ERBB1_RECEPTOR_PROXIMAL_PATHWAY		35	0.233698	1.63583	0.0247934	0.0890095	1	13923	tags=94%, list=71%, signal=324%
SU_TESTIS	SU_TESTIS		68	0.164823	1.63555	0.0288248	0.0890309	1	12936	tags=82%, list=66%, signal=241%
WU_HBX_TARGETS_2_UP	WU_HBX_TARGETS_2_UP		21	0.293119	1.63524	0.0371134	0.0890698	1	11073	tags=86%, list=56%, signal=197%
KYNG_DNA_DAMAGE_BY_GAMMA_RADIATION	KYNG_DNA_DAMAGE_BY_GAMMA_RADIATION		71	0.163716	1.63195	0.0454545	0.0904124	1	8406	tags=59%, list=43%, signal=103%
CREIGHTON_ENDOCRINE_THERAPY_RESISTANCE_4	CREIGHTON_ENDOCRINE_THERAPY_RESISTANCE_4		275	0.0857047	1.62862	0.0399202	0.091837	1	11399	tags=67%, list=58%, signal=157%
REACTOME_RNA_POL_III_CHAIN_ELONGATION	REACTOME_RNA_POL_III_CHAIN_ELONGATION		16	0.336729	1.62844	0.0406977	0.0918411	1	8114	tags=75%, list=41%, signal=128%
PETRETTO_HEART_MASS_QTL_CIS_DN	PETRETTO_HEART_MASS_QTL_CIS_DN		19	0.313846	1.62758	0.0358566	0.0921257	1	10371	tags=84%, list=53%, signal=178%
BIOCARTA_HIF_PATHWAY	BIOCARTA_HIF_PATHWAY		15	0.347501	1.6275	0.0403071	0.0920664	1	11500	tags=93%, list=59%, signal=225%
PID_AR_PATHWAY	PID_AR_PATHWAY		57	0.183078	1.62695	0.0359281	0.0922049	1	12253	tags=81%, list=62%, signal=214%
LIN_APC_TARGETS	LIN_APC_TARGETS		69	0.168612	1.62664	0.0399202	0.0922627	1	14903	tags=93%, list=76%, signal=384%
CHIARETTI_T_ALL_RELAPSE_PROGNOSIS	CHIARETTI_T_ALL_RELAPSE_PROGNOSIS		19	0.312144	1.62526	0.0354906	0.0927665	1	7306	tags=68%, list=37%, signal=109%
GAZIN_EPIGENETIC_SILENCING_BY_KRAS	GAZIN_EPIGENETIC_SILENCING_BY_KRAS		22	0.29143	1.62442	0.0417495	0.0930574	1	7666	tags=68%, list=39%, signal=112%
NEWMAN_ERCC6_TARGETS_UP	NEWMAN_ERCC6_TARGETS_UP		21	0.293592	1.62351	0.0349076	0.0933927	1	7326	tags=67%, list=37%, signal=106%
DANG_REGULATED_BY_MYC_DN	DANG_REGULATED_BY_MYC_DN		231	0.0926329	1.62276	0.0411765	0.0936067	1	14003	tags=81%, list=71%, signal=278%
SESTO_RESPONSE_TO_UV_C7	SESTO_RESPONSE_TO_UV_C7		62	0.172588	1.62165	0.038835	0.0940466	1	14980	tags=94%, list=76%, signal=394%
KEGG_APOPTOSIS	KEGG_APOPTOSIS		82	0.153772	1.62072	0.0329457	0.0943764	1	9438	tags=63%, list=48%, signal=122%
REACTOME_SIGNALING_BY_SCF_KIT	REACTOME_SIGNALING_BY_SCF_KIT		73	0.162022	1.62012	0.0473118	0.094546	1	14304	tags=89%, list=73%, signal=327%
ZHONG_SECRETOME_OF_LUNG_CANCER_AND_FIBROBLAST	ZHONG_SECRETOME_OF_LUNG_CANCER_AND_FIBROBLAST		123	0.125129	1.61942	0.0491453	0.0947763	1	15108	tags=89%, list=77%, signal=386%
KEGG_ERBB_SIGNALING_PATHWAY	KEGG_ERBB_SIGNALING_PATHWAY		86	0.149458	1.61843	0.0440882	0.0951167	1	15333	tags=93%, list=78%, signal=424%
ZHENG_GLIOBLASTOMA_PLASTICITY_UP	ZHENG_GLIOBLASTOMA_PLASTICITY_UP		226	0.0900924	1.61633	0.045098	0.09597	1	15096	tags=86%, list=77%, signal=368%
BURTON_ADIPOGENESIS_10	BURTON_ADIPOGENESIS_10		27	0.259894	1.61516	0.0337079	0.096427	1	11622	tags=85%, list=59%, signal=209%
FLOTHO_PEDIATRIC_ALL_THERAPY_RESPONSE_UP	FLOTHO_PEDIATRIC_ALL_THERAPY_RESPONSE_UP		51	0.192087	1.61464	0.0383142	0.09659	1	10091	tags=71%, list=51%, signal=145%
HOLLEMAN_ASPARAGINASE_RESISTANCE_ALL_UP	HOLLEMAN_ASPARAGINASE_RESISTANCE_ALL_UP		20	0.304158	1.61456	0.0383877	0.0965371	1	9735	tags=80%, list=50%, signal=159%
RODWELL_AGING_KIDNEY_DN	RODWELL_AGING_KIDNEY_DN		121	0.129762	1.61318	0.0445344	0.097055	1	15794	tags=93%, list=80%, signal=476%
PHONG_TNF_TARGETS_UP	PHONG_TNF_TARGETS_UP		58	0.177608	1.61307	0.04375	0.097008	1	2614	tags=31%, list=13%, signal=36%
SHIPP_DLBCL_VS_FOLLICULAR_LYMPHOMA_UP	SHIPP_DLBCL_VS_FOLLICULAR_LYMPHOMA_UP		40	0.215923	1.61216	0.0436508	0.0973089	1	14903	tags=98%, list=76%, signal=405%
HEDENFALK_BREAST_CANCER_HEREDITARY_VS_SPORADIC	HEDENFALK_BREAST_CANCER_HEREDITARY_VS_SPORADIC		47	0.199269	1.61192	0.0403846	0.0973174	1	11546	tags=79%, list=59%, signal=191%
WU_HBX_TARGETS_1_DN	WU_HBX_TARGETS_1_DN		22	0.286317	1.61145	0.0440882	0.0974479	1	12226	tags=91%, list=62%, signal=241%
CHICAS_RB1_TARGETS_GROWING	CHICAS_RB1_TARGETS_GROWING		212	0.0956679	1.61135	0.04158	0.0972993	1	7213	tags=46%, list=37%, signal=72%
VANTVEER_BREAST_CANCER_POOR_PROGNOSIS	VANTVEER_BREAST_CANCER_POOR_PROGNOSIS		45	0.201635	1.61025	0.0366795	0.0976257	1	6517	tags=53%, list=33%, signal=80%
REACTOME_GLYCEROPHOSPHOLIPID_BIOSYNTHESIS	REACTOME_GLYCEROPHOSPHOLIPID_BIOSYNTHESIS		75	0.163511	1.60934	0.0403226	0.0979638	1	13286	tags=84%, list=68%, signal=259%
REACTOME_DNA_STRAND_ELONGATION	REACTOME_DNA_STRAND_ELONGATION		29	0.249721	1.60839	0.0395257	0.0981704	1	12699	tags=90%, list=65%, signal=254%
REACTOME_GOLGI_ASSOCIATED_VESICLE_BIOGENESIS	REACTOME_GOLGI_ASSOCIATED_VESICLE_BIOGENESIS		48	0.19985	1.60816	0.0404858	0.0981828	1	11213	tags=77%, list=57%, signal=179%
REACTOME_DEVELOPMENTAL_BIOLOGY	REACTOME_DEVELOPMENTAL_BIOLOGY		361	0.0729303	1.60708	0.0350877	0.0985836	1	17728	tags=98%, list=90%, signal=991%
ACOSTA_PROLIFERATION_INDEPENDENT_MYC_TARGETS_UP	ACOSTA_PROLIFERATION_INDEPENDENT_MYC_TARGETS_UP		68	0.167117	1.6055	0.046748	0.099228	1	12314	tags=79%, list=63%, signal=212%
[truncated: 39 more rows]

## Sheet: Supplementary Table 9
Supplementary Table 9. K562 Gene Set Enrichment Analysis negatively enriched (downregulated) (p value< 0.05, FDR<0.2)
[truncated: 135 more rows]

[truncated: 3 more sheets: Supplementary Table 10, Supplementary Table 11, Supplementary Table 12]
