# Supplementary material for: Small-molecule targeting of MUSASHI RNA-binding activity in acute myeloid leukemia
Source: Nat Commun. 2019 Jun 19;10:2691. doi: 10.1038/s41467-019-10523-3 (PMC6584500; doi:10.1038/s41467-019-10523-3)
Supplement: Supplementary file 6 — Source Data [file 41467_2019_10523_MOESM6_ESM.xlsx]

## Sheet: Figure 1
NCOMMS-18-35326-T
Figure 1a
Log conc (uM)	Fluorescence polarization (raw values) GST-MSI2							AVG	SD	SEM
0.01	218	226	225	228	222	247.33	256	231.761	14.1869	5.36215
0.024	218	228	221	212	223	220.67	225.33	221.143	5.19158	1.96223
0.049	219	222	208	217	214	248.67	218.67	221.049	12.9746	4.90394
0.098	215	219	215	213	209	191.33	209.33	210.237	9.03349	3.41434
0.195	224	219	201	210	209	204.67	162.67	204.334	20.0118	7.56375
0.391	218	205	196	194	193	167.33	131.33	186.38	28.6774	10.839
0.781	202	204	187	187	189	113.33	72.67	165	51.0369	19.2902
1.562	164	178	171	170	170	62.67	151	152.381	40.4327	15.2821
3.125	134	156	152	154	153	21.33	23.33	113.38	62.63	23.6719
6.25	92	89	80	87	75	16	26.67	66.5243	31.5381	11.9203
12.5	76	53	52.5	73	75	23.33	16.67	52.7857	24.5394	9.27504
25	68	45	16	19	17	15.33	10	27.19	21.2718	8.03998
50	23	24	33	25	29	22	28	26.2857	3.9036	1.47542
100	35	25	31	29	18	20	14	24.5714	7.59072	2.86902
Figure 1b
	Normalized Band Intensity
Protein	#1	#2	#3	#4	#5	#6
GST	-	-	0.00632046	-	0.0101912	0.0668
125 ng GST-MSI2	0.361276	0.260801	0.472444	0.480931	0.849591	0.671282
250 ng GST-MSI2	0.915709	0.879991	1.3043	0.849591	1.26923	0.835197
+unlabeled RNA	0.0377514	0.0244436	0.0310218	0.0151598	0.0364833	0.039178
In red there are lines not quantified
Figure 1c
GST-MSI2	Normalized Band Intensity
Treatment	#1	#2	#3	#4	#5	#6	#7
DMSO	0.849591	1.26923	0.77261	1.05157	1.06293	0.835197	1.27894
5 uM Ro	0.495499	0.649203	-	-	1.01188	0.560542	-
10 uM Ro	0.50152	0.582409	0.340816	0.762603	0.317457	-	0.429703
20 uM Ro	0.149822	0.368411	0.375428	0.648373	0.184711	-	-
40 uM Ro	0.203046	0.0942028	0.26964	0.291383	0.127012	-	-
In red there are lines not quantified
								5
Figure 1d
	MST Fraction bound (%)
	SYNCRIP			MSI WT			TIA-1			RBMX			SFSR2			HUR			MSI2/RNA			ALBUMIN
Ro 08-2750 (uM)	AVG	SD	n	AVG	SD	n	AVG	SD	n	AVG	SD	n	AVG	SD	n	AVG	SD	n	AVG	SD	n	AVG	SD	n
0.0153	0	0	3	0	1.80094	3	0.5	0	3	0	0.5666	3	2.60489	1.72533	3	0	0.31968	3	0	7.71188	3	0.244	0.9554	3
0.0305	-5.43559	7.10891	3	2.85352	0.641439	3	1.55352	1.87846	3	0.513179	0.31968	3	2.48085	1.31196	3	1.37207	2.03664	3	2.76843	5.60673	3	-0.18043	1.78587	3
0.061	2.93107	10.584	3	-1.42042	0.96601	3	1.95978	0.76833	3	2.97302	1.14024	3	2.41205	0.51386	3	1.01628	2.29942	3	-1.41354	8.78703	3	0.73467	0.87077	3
0.1221	2.78779	18.0847	3	1.06664	2.0299	3	1.83897	1.70625	3	3.43167	1.18409	3	2.51721	1.95912	3	1.34774	0.21593	3	1.06418	2.86592	3	0.36226	1.24318	3
0.2441	1.90001	6.579	3	-0.756789	3.4262	3	3.81015	0.58105	3	3.67158	1.70418	3	1.96951	0.32374	3	1.59026	1.23815	3	1.17837	2.9577	3	0.61133	0.99411	3
0.4883	4.24071	4.59987	3	6.0935	0.625678	3	3.90806	0.69279	3	3.02099	0.76962	3	2.60489	2.99149	3	1.93711	0.43525	3	-1.23236	4.41549	3	1.0317	0.57374	3
0.9766	2.06921	8.72311	3	3.64175	1.70569	3	11.2918	0.83247	3	2.61379	1.26624	3	1.92598	1.4741	3	3.79898	1.17187	3	0.68	2.07024	3	0.54511	1.06033	3
1.9531	3.9301	4.08286	3	8.96418	0.750603	3	10.8661	0.32709	3	2.78858	0.99127	3	3.58	0.84972	3	4.36218	1.19845	3	4.10806	4.9	3	1.3155	0.28994	3
3.9063	0.437766	2.31131	3	12.0674	1.97795	3	13.5579	0.90279	3	3.64591	1.7918	3	8.57	1.07486	3	4.67933	1.0365	3	6.10852	2.5	4	0.86057	0.74487	3
7.8125	7.5907	1.94432	3	32.902	1.95316	3	11.3658	0.93145	3	3.84294	1.32582	3	17.1491	2.18976	3	3.61761	1.95574	3	10.3288	6.89614	4	1.14299	0.46245	3
15.625	8.35496	1.61878	3	64.1102	0.74347	3	12.5241	0.96843	3	12.554	2.15268	3	19.2598	0.80093	3	3.74084	0.26849	3	26.0322	1.01996	3	1.42501	0.18043	3
31.25	22.8099	7.65616	3	73.349	2.44079	3	12.8129	2.51347	3	17.5882	0.51769	3	26.0489	1.01385	3	4.6673	1.57038	3	60.0251	6	3	0.50542	1.10002	3
62.5	37.6954	20.6903	3	92.39	2.60503	3	24.839	1.17435	3	21.3742	1.01827	3	32.7341	0.60135	3	5.40245	0.26715	3	71.5	1.65425	3	0.13783	1.46761	3
125	56.5153	6.7997	3	95.5729	2.21135	3	39.1935	1.66557	3	30.9619	1.46125	3	42.8751	1.75406	3	6.43901	2.59948	3	80.3855	2.69864	3	0.46697	1.13847	3
250	72.1317	4.24597	3	96.8356	2.48481	3	55.3228	0.84696	3	63.9014	0.43282	3	53.079	5.52687	3	6.46056	1.43039	3	90.5959	1.75418	3	1.3865	0.21894	3
500	100	0	3	101.5	2.69824	3	73.75	1.78587	3	96.5355	0.89341	3	62.7663	1.3787	3	8.352	0.3787	3	100	3.38105	3	0.75848	0.84696	3

## Sheet: Figure 2
NCOMMS-18-35326-T
Figure 2a, b, c, e, f, g - Structural & chemical
Figure 2d
	F97A			MSI WT			F66A/F97A/R100A			K22A			F66A			R100A
Ro 08-2750 (uM)	AVG	SD	n	AVG	SD	n	AVG	SD	n	AVG	SD	n	AVG	SD	n	AVG	SD	n
0.0153	3.91053	2.49673	3	0	1.80094	6	0.0507371	7.71188	3	0	0	3	0	0.07605	3	0	0.63701	3
0.0305	2.39	2.98958	3	2.85352	0.641439	6	0.363154	5.60673	3	3.78912	1.333	3	6.3468	2.71703	3	3.3926	0.63639	3
0.061	1.45	4.91115	3	-1.42042	0.96601	6	0.0423174	8.78703	4	6.59653	3.4	3	0.3739	2.20239	3	3.3244	0.42172	3
0.1221	4.5988	3.09878	3	1.06664	2.0299	6	0.153993	2.86592	4	10.9026	1.09955	3	5.4476	1.12494	3	4.3911	0.16592	3
0.2441	3.91053	1.13947	3	-0.756789	3.4262	6	0.215689	2.9577	4	5.89822	3.44477	3	8.249	0.76507	3	1.2166	0.46561	3
0.4883	6.5092	1.43594	3	6.0935	0.625678	6	0.0965776	4.41549	4	9.91914	7.1479	3	3.7639	0.31927	3	-0.3248	0.56373	3
0.9766	5.69999	0.62657	3	7.22382	0.750603	6	0.175808	2.07024	3	7.51379	6.5437	3	3.1559	0.87295	3	-0.6211	0.65923	3
1.9531	12.0677	2.87858	3	8.31356	1.97795	6	0.215513	13.5103	3	9.34409	2.97065	3	2.9084	1.37842	3	3.9104	0.06333	3
3.9063	13.2166	7.35213	3	16.3846	1.95316	6	2.5	13.9276	4	4.85094	2.98746	3	2.9084	0.46076	3	0.6023	0.69754	3
7.8125	15.0871	3.12255	3	38.9985	0.74347	6	0.371946	6.89614	4	8.14493	7.32013	3	5.0401	0.86964	3	2.2754	0.51408	3
15.625	29.1997	0.73058	3	62.8903	6.01989	6	0.8777	1.01996	3	12.455	0.791411	3	2.3003	0.11441	3	4.944	0.5778	3
31.25	45.5147	2.5617	3	85.3781	2.63084	6	0.835585	10.189	3	14.8397	4.42772	3	3.1483	0.73904	3	1.5435	0.49508	3
62.5	61.1849	2.37726	3	92.88	1.8055	6	0.947768	1.65425	4	16.1389	6.9038	3	6.1321	1.26071	3	2.9695	0.63168	3
125	78.5515	2.93324	2	96.8356	2.21135	6	1.05074	2.69864	4	27.6025	1.33966	3	17.2968	0.46352	3	16.932	0.33724	3
250	89.9608	0.41844	2	93.5729	2.48481	6	3.92224	1.75418	4	40.0289	3.29547	3	45.989	1.70551	3	20.0967	0.93646	3
500	100	0.5	2	102.5	2.69824	6	2.54613	3.38105	4	50.0345	0.820254	3	73.7972	1.08602	3	27.853	0.71658	3
Figure 2h
															GST-MSI2-RNA complex 1
		Normalized Band Intensity
		#1	#2	#3
	DMSO	0.995	1.078	1.068											MSI2-RNA complex 2
	+Ro 08-2750	0.367	0.18	0.146											(GST lost)
	+Ro-OH	0.77	0.49	0.502
	+unlabeled RNA	0.308	0.285	0.122
	Normalized per experiment (Gel#) and or Set# (batch of GST-MSI2 tested), both bands were quantified
															Free RNA
Figure 2i
	Normalized Band Intensity
	#1	#2	#3	#4
DMSO	1	1.001	1.08	0.987
+Ro 08-2750	0.438	0.358	0.279	0.488
+Ro-NGF	0.828	0.735	0.818	1.576
+unlabeled RNA	0.064	0.158	0.335	0.155
From Gel #4 DMSO II and unlabelled RNA II were quantified for this analysis
Figure 2j
Ro (uM)	MSI2 WT + Ro-NGF			MSI2 WT + Ro 08-2750			MSI2 WT + Ro-OH
0.0153	0.0507371	7.71188	3	0	1.75371	3	0	2.93536	3
0.0305	0.363154	5.60673	3	2.6542	0.49781	3	3.93	8.83008	3
0.061	0.0423174	8.78703	4	-1.32128	0.86418	3	-4.36	1.6678	3
0.1221	0.153993	2.86592	4	0.992072	1.94205	3	-0.81	2.23486	3
0.2441	0.215689	2.9577	4	-0.7039	3.34282	3	-5.43	3.11049	3
0.4883	2.09658	4.41549	4	5.66796	0.45324	3	2.02	0.56111	3
0.9766	0.175808	2.07024	3	8.009	1.58623	3	3.18	1.69447	3
1.9531	1.21551	3.98374	3	10.2	0.57189	3	6.71	0.6729	3
3.9063	1.8	3.98374	4	15.2406	1.87041	2	10.75	2.25864	4
7.8125	0.371946	6.89614	4	36.2753	1.84649	3	17.32	0.4689	4
15.625	0.342607	1.01996	3	58.4987	0.56848	3	21.68	1.88171	4
31.25	0.835585	5.4	3	79.4163	2.37889	3	31.36	1.70727	4
62.5	0.947768	1.65425	4	86.9458	2.35308	3	42.96	0.20079	4
125	1.05074	2.69864	4	96.8356	2.12327	3	63.39	4.12655	4
250	5	1.75418	4	86.9458	2.35308	3	80.59	3.76586	4
500	0.546134	3.38105	4	100	2.19824	3	100	4.44073	4

## Sheet: Figure 3
NCOMMS-18-35326-T
Figure 3a
CONC (uM)					Ro 08-2750							Ro-OH			Ro-NGF
0.001	100	101	99.5	101	100.5	101	98.7	101	98.9	99.5	101	100.5	101	98.7	99.5	101.2
0.0501187	100	98.5	100	101	100	100	99	100	100	100	100	100	100	100	100	100
0.1	98.3085	96.2518	95.6655	92.3089	93.5064	92.4634	95.93	91.4616	81.0861	96.5523	99.2717	94.6612	96.8616	86.5722	92.5842	94.1176
0.199526	94.7788	97.2603	80.9444	91.2118	95.3801	87.7429	88.0472	87.4642	78.1202	90.786	100.062	96.6827	94.7542	83.2289	87.065	98.3373
0.398107	93.723	93.3509	75.1308	89.9308	92.6617	85.6051	84.895	91.4773	78.9223	85.9546	99.7974	101.957	93.7324	88.3917	90.2547	96.223
0.794328	83.8247	92.2703	71.095	86.5201	94.8435	94.5468	86.1415	90.4915	86.6756	77.8914	104.068	106.154	93.8108	84.2179	86.0517	93.4978
1.58489	83.5117	83.4636	64.9524	79.247	84.7303	87.4814	82.8731	63.6647	47.5059	60.842	98.4493	97.1832	90.6471	89.3144	85.3547	93.7587
3.16228	53.0004	54.6025	38.943	47.8769	33.6874	46.4907	31.5451	19.7994	16.5039	24.4859	97.0578	93.9966	92.0277	85.3087	83.0552	90.0889
6.30957	4.67455	8.76333	7.14218	4.32012	8.12508	21.45684*	4.16213	9.3842	6.22477	9.89866	93.4237	84.0645	82.4717	81.3576	80.9988	87.4027
12.5	0.108285	0.0346203	0.407051	0.189952	0.076799	0.194537	0.0406671	1.05089	0.718547	0.759856	81.6943	80.27	82.7676	72.0168	76.7322	82.494
25	0.0185171	0.0119197	0.0193447	0.0149638	0.0109511	0.0107091	0.00671364	0.0208253	0.0110284	0.0122213	40.2221	42.1869	39.2084	68.1202	72.2291	71.3072
50	0.0183158	0.0104772	0.0113705	0.0117151	0.00480435	0.00684366	0.00500772	0.010056	0.00878186	0.0161369	0.455211	4.05423	1.58913	54.4164	56.944	59.9817
100	0.0192215	0.0101735	0.0131426	0.0112721	0.00551088	0.00798427	0.00709885	0.00955679	0.0135472	0.0173234	0.157702	0.257445	0.441242	29.8907	30.8124	27.5063
We considered the value in blue (21.46) and outlier based on its SD from the AVG of 6.97%									AVG (6.31 uM)	6.96611
Figure 3b	Differentiation (Myeloid Markers)
Mac1 MFI					48h
	#1	#2	#3	#4	#5	#6	#7	#8	#9	#10
DMSO	0.777	1.223	1.001	1.658	0.947	1.061	0.992	0.933	1.066	1.001
5 uM Ro	2.467	1.425	1.214	2.724	1.103	1.458	1.088	2.523	2.543	1.804
GR1 MFI			48h
	#1	#2	#3	#4	#5	#6
DMSO	0.774	1.226	0.683	1.595	0.814	1.262
5 uM Ro	2.347	4.385	1.078	3.006	0.987	1.678
Figure 3c	Morphology
Figure 3d	Apoptosis
Annexin V+	8h						16h						24h						48h
	#1	#2	#3	#4	#5	#6	#1	#2	#3	#4	#5	#6	#1	#2	#3	#4	#5	#6	#1	#2	#3	#4	#5	#6
DMSO	18	19	15.5	-	-	-	15.85	18.85	19.1	20.3	17.3	21.25	32	25.7	29.3	28	33.3	38.95	35.3	24.85	30.55	-	-	-
5 uM Ro	24	23.51	22.6	-	-	-	28.65	54.4	42.65	24.1	32	26.05	55.2	40	48.9	56.4	44.8	66.3	56.95	39.7	44.55	-	-	-
10 uM Ro	42	36.5	41.35	-	-	-	54.4	42.65	54.75	37.5	40.05	48.75	67.6	59.5	62.15	78.7	76.6	85.5	80.25	87.55	74.7	-	-	-
Figure 3e	CFU
DMSO		1 uM Ro		5 uM Ro		10 uM Ro
MIB	MSI2-BFP	MIB	MSI2-BFP	MIB	MSI2-BFP	MIB	MSI2-BFP
1.15686	1.18966	0.911765	0.814	0.191176	0.91	0	0.243
1.03405	0.948276	0.840855	0.762	0.364212	0.881	0.0205859	0.343
1.10124	0.909962	1.18769	0.924	0.543517	0.806	0.0248668	0.435
0.980392	0.952107	0.730392	1.034	0.220588	0.799	0.0171569	0.41
0.942201	1.16765	0.872526	1.151	0.416469	0.845	0.02692	0.464
1.05151	1.12063	1.09651	0.902	0.470101	0.915	0.0236827	0.521
0.936275	1.08519
1.11322	0.864626
0.994671	0.893367
0.926471	0.81836
0.91053	1.14034
0.852575	0.909843
Figure 3f
Figure 3g	CFU LSK vs MLL-AF9+
	LSK						MLL-AF9+
Expt	#1	#2	#3	#4	#5	#6	#1	#2	#3	#4	#5	#6
DMSO	1.06931	0.930693	1.11439	0.99139	1.11439	0.952029	1.00998	0.986444	1.10009	-	-	-
1 uM Ro	-	1.48515	0.789543	0.910209	-	-	0.8695	0.776744	0.927429	-	-	-
5 uM Ro	-	1.40594	0.839216	0.99385	-	-	0.56609	0.444961	0.649447	-	-	-
10 uM Ro	-	1.08911	0.640523	0.590406	-	-	0.014294	0.020155	0.0123001	-	-	-

## Sheet: Figure 4
NCOMMS-18-35326-T
Figure 4a	MOLM13 + Ro 08-2750
CONC (uM)	MOLM13 Ro 08-2750						MOLM13 Ro-OH						MOLM13 Ro-NGF
0.001	101	101.3	100.25	101	101.5	99.8	102	102	101	99.8			101.5	99.8	100.5
0.0501187	100	100	100	100	100	100	100	100	100	100			100	100	100
0.1	96.8935	97.0169	96.4983	98.7234	99.6926	93.1583	98.8866	101.087	93.4656	95.5255			103.778	96.7364	96.4118
0.199526	95.3389	95.0494	97.602	97.4733	94.6662	96.7477	100.191	100.449	91.0952	95.3179			99.5224	96.2024	99.6642
0.398107	94.4334	96.1625	97.5551	92.2719	104.103	96.3039	106.839	99.9713	91.4561	96.2713			105.352	96.3118	101.083
0.794328	95.8945	95.6516	96.1001	99.0742	91.717	86.8879	100.484	99.4444	95.7848	101.274			107.758	97.7335	98.6012
1.58489	91.1795	94.7715	95.3152	97.6078	93.8846	91.3115	101.888	101.128	91.2753	97.8916			100.664	94.8077	98.1516
3.16228	86.6384	91.5176	90.6156	88.657	84.0604	83.7877	98.6173	102.543	92.6781	93.7945			101.776	95.6504	100.621
6.30957	51.6864	65.4256	80.70111*	75.8265	71.3701	69.1549	100.151	85.583	80.2547	83.9116			96.9081	81.0786	98.2798
12.5	9.51432	51.974	54.9647	38.8561	17.072	39.3367	108.018	87.9643	83.3765	86.9465			95.1853	93.0302	96.0812
25	0.0243264	2.03719	6.07964	1.88504	0.110956	2.18461	85.8468	56.5592	64.1899	67.8666			87.9845	89.1831	88.7035
50	0.0127887	0.117789	0.0511823	0.012696	0.019292	0.147007	57.2234	22.843	27.9089	27.2377			72.2523	75.5953	51.1667
100	0.00688089	0.068776	0.0275395	0.0119756	0.0116325	0.097298	22.4549	4.05222	4.40719	3.23734			28.2858	40.0304	30.5838
	1 discarded data point outlier, based on SD from AVG				AVG (6.31 uM)	66.6927
	K562 + Ro 08-2750
CONC (uM)	K562 Ro 08-2750						K562 Ro-NGF						K562 Ro-OH
0.001	101	99.8	102	101	99.5		101	100	99.8				100.76	101	99.07	101.3	99.6	100.223
0.0501187	100	98.6	100	100	101.5		100	99.4	100				100	100	100	100	100	100
0.1	95.9351	95.8401	94.9051	86.0454	89.6692		96.8832	100.466	94.8002				95.7931	104.918	93.0714	90.9432	91.4995	99.7058
0.199526	97.5738	93.6979	92.0735	84.3925	87.2134		97.6309	100.291	97.0561				94.4057	103.309	90.9361	93.9885	95.1095	95.0774
0.398107	96.5268	96.7584	91.9135	84.4487	87.9949		102.185	99.4717	94.3351				93.4717	100.192	92.0491	92.6858	96.5377	105.452
0.794328	103.441	96.6706	92.7043	87.4734	80.8626		105.507	109.398	93.5854				86.0994	81.3959	90.0907	93.9368	94.451	102.754
1.58489	93.1792	88.0094	90.7065	86.8581	85.2423		106.916	106.143	95.7145				95.336	72.3138	95.6892	87.6829	91.0096	94.3621
3.16228	92.5436	93.8269	86.9677	82.6834	79.4246		102.122	103.981	101.671				92.3644	74.9384	88.7639	92.3999	94.0012	104.654
6.30957	62.4903	54.8804	78.9948	78.6515	58.1018		88.2452	97.2964	100.641				90.1645	77.7929	95.9536	91.5309	87.1145	100.649
12.5	27.2272	21.6151	34.1803	42.9384	38.9626		96.7358	100.747	101.349				81.6611	68.9728	87.0456	89.3567	83.3574	97.3764
25	1.13367	0.329751	0.329335	0.213399	1.89635		88.6693	82.6614	96.3593				77.8012	43.0639	87.4598	71.1587	67.7348	84.246
50	0.326526	0.180044	0.0374927	0.0127562	0.00933608		46.0822	36.4528	84.18915*				34.4423	4.93914	55.9357	40.0038	35.7285	38.6723
100	0.147912	0.0874445	0.0247924	0.0111224	0.00831014		7.02118	5.52457	12.5678				3.17596	0.172409	31.0349	5.4278	6.4334	3.38469
							1 discarded data point outlier, based on SD from AVG and not fitting if included
Figure 4b	Differentiation MOLM13
CD14-PE MFI	48h
DMSO	1.02	0.98	0.99	1.01	1.06	0.94
20 uM Ro	2	2.38	1.27	1.15	1.61	1.48
	Differentiation K562
CD235a-PE MFI	48h
DMSO	1.25	1.05	0.98	0.75	0.95	-
20 uM Ro	1.82	1.46	1.44	1.3	1.41	-
Figure 4c	Morphology
Figure 4d	Apoptosis MOLM13
Annexin V+	48h					72h					96h
DMSO	15.5	12.35	18.55	7.3	7.95	16.6	13.05	20.5	14	23.6	23.3	11.2	11.7	10.85
20 uM Ro	42.05	27.4	37.5	31.3	33.5	46.2	28.3	32.8	58.6	53.2	58.25	46.65	63.99	51.3
	Apoptosis K562
Annexin V+	48h							72h							96h
DMSO	29.1*	10.88	27.62	10.7	8.8	7.1	11.3	37.55*	12.45	20.1	19.25	15	14.6	10.35	45.4	46.55	13.35	10.05	8.5	14.75	20.7
20 uM Ro	39.6	42	41.5	32.6	16	26	33	43.35	42.1	35.3	36	23	66.9	39.2	61.6	99.7	30.54	31	57.3	35	50.2
Figure 4e
MOLM13 CFU
	DMSO	1 uM Ro	5 uM Ro	10 uM Ro	20 uM Ro
Expt#1	1.09201	1.03699	0.849315	0.583942	0.00771605
Expt#2	1.2302	1.0013	0.782269	0.46472	0.0284464
Expt#3	1.29255	0.724289	0.656455	0.664234	0.224658
Expt#4	0.770138	0.547945	0.523288	0.430922	0.100933
K562 CFU
	DMSO	1 uM Ro	5 uM Ro	10 uM Ro	20 uM Ro
Expt#1	0.875912	0.579075	0.5689	0.415069	0.114355
Expt#2	0.888078	0.486618	0.552311	0.560626	0.199513
Expt#3	1.23601	1.19708	0.785888	0.426357	0.279805
Expt#4	1.0789	0.8744	0.657	0.523288	0.180999
Figure 4f
	CD34+			AML
Expt	#1	#2	#3	#1	#2	#3
DMSO	1.0006	0.9346	1.0715	1.05	0.956	1.04
1 uM Ro	1.1962	0.9811	0.9813	0.82	1.03	0.98
5 uM Ro	1.0386	0.9896	0.8679	0.36	0.44	0.43
10 uM Ro	1.1966	0.9426	0.9549	0.27	0.26	0.28
20 uM Ro	0.7056	0.732	0.7212	0.11	0.1	0.05

## Sheet: Figure 5
NCOMMS-18-35326-T
Figure 5a	Scheme
Figure 5b	RNA IP - % INHIBITION. Normalized to K562-FLAG-MSI2 DMSO reated
	DMSO	TGFBR1	cMYC	SMAD3	CDKN1A
Expt #1	1	0.054	0.0414774	-	-
Expt #2	1.05	0.307	0.654768	0.019	0.653378
Expt #3	1.01	0.555	0.558	0.693	0.677032
Expt #6	1.02	0.609	0.483	0.454	0.197531
Figure 5c	GSEA Plots
Figure 5d	Scheme
															In Figure 5g and 5h, we used both film and digital developing methods. Both are shown here.
Figure 5e							Figure 5f								Figure 5g									Figure 5h

## Sheet: Figure 6
NCOMMS-18-35326-T
Figure 6a	Scheme
Figure 6b	Surface flow
DMSO	Ro 4h	Ro 12h
1.2132	0.558376	0.464467
1.05838	0.690355	0.576142
0.908629	0.829949	0.80203
0.819797	0.893401	0.928818
0.906704	0.984772	0.480995
1.04216	1.10021	0.771251
1.24395	0.608155
0.807187	0.58604
1.09883	0.890117
Figure 6c	Intracellular (IC) flow
DMSO	Ro 4h	Ro 12h
0.582063	0.376443	0.649186
0.919062	0.520377	0.794405
1.20347	0.504164	0.5184
1.29541	0.362504	0.640289
0.892033	0.879025	0.81176
0.926149	0.754566	0.520771
1.3235	0.772627
0.734497	0.883002
1.12382	0.657235
Figure 6d	Scheme
Figure 6e	Spleen weights (g)
	DMSO	Ro 13.75 mg/kg
	0.279	0.262
	0.28	0.18
	0.247	0.16
	0.25	0.113
	0.253	0.182
	0.306	0.338
	0.278	0.278
	0.268	0.022																						Figure 6e	Intracellular (IC) flow							Figure 6e	Intracellular (IC) flow							Figure 6e	Intracellular (IC) flow							Figure 6e	Intracellular (IC) flow
	0.275
Figure 6f	WBC (K/uL)
	DMSO	Ro 13.75 mg/kg
	136.2	67.8
	166.94	151.74
	50.34	75.68
	208.4	17.14
	190.68	90.04
	228.8	90.38
	193.2	103.86
	161.4	5.58
	291.4
Figure 6g	IC flow (cMYC % freq)
	DMSO	Ro 13.75 mg/kg
	69.6	79.4
	74.8	40.7
	66.5	28.3
	55.4	58.9
	84.8	57.8
	62	51.4
	65.7	34.7
	52.9	34.5
	70.6

## Sheet: Supplementary Fig 1
NCOMMS-18-35326-T
Supplementary Figure 1a					Supplementary Figure 1c						Supplementary Figure 1d						Supplementary Figure 1e
					MSI2 RNA + 100 uM Ro 08-2750			Buffer + 100 uM Ro 08-2750			Poly A + 100 uM Ro 08-2750			Buffer + 100 uM Ro 08-2750			MSI2 + 100 uM Ro 08-2750			Buffer + 100 uM Ro 08-2750
MST RRM1					Time (sec)	ucal/sec		Time (sec)	ucal/sec		Time (sec)	ucal/sec		Time (sec)	ucal/sec		Time (sec)	ucal/sec		Time (sec)	ucal/sec
	RRM1 WT				5	0.000579251		5	-0.000164745		5	-0.00115563		5	-0.00104944		5	-0.000822029		5	-0.000489508
Ro (uM)	AVG	SD	n		6	0.000954369		6	-0.000407439		6	-0.00122103		6	-0.000502837		6	-0.00108019		6	-0.00021972
0.0153	5.77243	5.96271	2		7	0.00196152		7	-0.000106409		7	-0.00205572		7	-0.000552147		7	-0.00216484		7	-0.000553142
0.0305	5.24854	6.64508	2		8	0.00120034		8	0.000508443		8	-0.00116367		8	-0.000906699		8	-0.0017655		8	-0.000919464
0.061	3.20112	7.38374	2		9	0.0012005		9	4.71974e-05		9	-0.00172989		9	-0.000995902		9	-0.00152178		9	-0.000658417
0.1221	4.68663	6.96342	2		10	0.00149174		10	-0.000140079		10	-0.000778047		10	-0.00137924		10	-0.00207338		10	-0.00136977
0.2441	5.52683	2.42125	2		11	0.00136381		11	0.000326664		11	-0.000382796		11	-0.000986284		11	-0.00203004		11	-0.00113332
0.4883	2.53929	5.13591	2		12	0.00221653		12	0.00033746		12	-0.000964779		12	-0.000796674		12	-0.0026616		12	-0.00117891
0.9766	1.98471	1.73945	2		13	0.00271977		13	6.23245e-05		13	-0.000919926		13	-0.00108013		13	-0.00264797		13	-0.000666427
1.9531	8.29202	7.61196	2		14	0.00327341		14	-0.00023874		14	0.000177951		14	-0.00170645		14	-0.00232914		14	-0.000825782
3.9063	9.52701	11.0769	2		15	0.00374741		15	-0.00047575		15	-0.000198959		15	-0.00222552		15	-0.000735162		15	-0.000816931
7.8125	17.3601	2.66071	2		16	0.00386175		16	-0.000398735		16	-0.000440705		16	-0.0031573		16	-0.000756175		16	-0.00185986
15.625	33.8538	3.52218	2		17	0.00346646		17	0.000142256		17	-0.000727145		17	-0.0028918		17	-0.000652389		17	-0.00213461
31.25	59.5584	6.98918	2		18	0.00400164		18	0.00098716		18	-0.000678211		18	-0.00341916		18	-0.00123409		18	-0.00244124
62.5	83.4121	4.48103	2		19	0.00351739		19	0.0015459		19	8.60974e-05		19	-0.00354956		19	-0.00189163		19	-0.00222985
125	100	8.03912	2		20	0.00198388		20	0.00163837		20	-0.000154293		20	-0.00287326		20	-0.00282545		20	-0.00193059
250	94.2577	6.67146	2		21	0.00280133		21	0.00122446		21	-0.00156952		21	-0.00215062		21	-0.000636502		21	-0.00163364
500	92.9948	2.19824	2		22	0.00362999		22	3.40562e-05		22	-0.000524452		22	-0.00222206		22	-0.00172405		22	-0.000779207
					23	0.00320016		23	-8.30014e-05		23	-0.00110543		23	-0.00110808		23	-0.000860079		23	-0.000227553
Supplementary Figure 1b		Scheme			24	0.00309218		24	0.000433131		24	-0.00043337		24	-0.000999267		24	-0.000294876		24	-0.000388968
					25	0.00374644		25	0.000122275		25	-0.000387788		25	-0.000766279		25	-0.000579255		25	-0.00064378
					26	0.00307337		26	0.000664239		26	-0.000968224		26	-0.00101985		26	-0.000244102		26	-0.000502358
					27	0.00142345		27	0.00142881		27	-0.000719452		27	-0.000910807		27	-9.03792e-05		27	-0.000525104
					28	0.00156721		28	0.00121577		28	-0.000908498		28	-0.000570034		28	0.000630879		28	-0.00038246
					29	0.00118519		29	0.000344867		29	-0.00101607		29	-0.000328505		29	0.00060856		29	-0.000264907
					30	0.00156803		30	-0.000204152		30	-0.00048295		30	-0.000537273		30	0.000111479		30	-0.00014296
					31	0.000696354		31	-0.000731561		31	0.000730015		31	-0.000997465		31	0.000658373		31	-0.000447173
					32	-0.000179124		32	-0.000537651		32	0.000601904		32	-0.000730289		32	0.000467907		32	-0.00173814
					33	-0.00132766		33	-0.00065273		33	0.000691725		33	-0.00107703		33	0.00126867		33	-0.000502532
					34	-0.00140848		34	-0.00097712		34	0.000648416		34	-0.000579049		34	0.00012511		34	-0.000309742
					35	-0.00179075		35	0.000118839		35	0.000340845		35	-0.000387791		35	0.000100907		35	-0.00145803
					36	-0.00181358		36	2.4793e-05		36	0.000697808		36	0.000995226		36	6.56526e-05		36	-0.000742674
					37	-0.00111607		37	-0.00148963		37	0.00104803		37	0.0010584		37	0.00132313		37	0.00017241
					38	0.000592752		38	-0.00176482		38	0.000930168		38	0.00126007		38	-0.00119377		38	0.0016264
					39	4.38911e-05		39	-0.000941178		39	0.000432805		39	0.000998462		39	-0.000999489		39	0.00153845
					40	0.0010484		40	-0.000679125		40	0.000644455		40	0.00143176		40	-0.000305966		40	0.00168767
					41	0.000987376		41	0.000350902		41	-0.000266439		41	0.000268037		41	-0.000565212		41	0.00149311
					42	0.00168196		42	-0.000128478		42	0.000598495		42	-0.000334682		42	-0.000109314		42	0.00195383
					43	0.000773329		43	-0.00012001		43	0.000637557		43	-0.000878469		43	0.000259565		43	0.000788812
					44	0.00168272		44	-0.00010406		44	-0.00015102		44	-0.000815468		44	-0.00189081		44	-0.000112986
					45	0.000981406		45	0.00103146		45	-0.000369077		45	-0.0013579		45	-0.00242276		45	-0.00080264
					46	0.0011307		46	-6.57567e-05		46	0.000281475		46	1.09563e-05		46	-0.000176832		46	-0.000651268
					47	0.000201966		47	3.20447e-05		47	-0.00104135		47	-0.000488362		47	-0.00187099		47	-0.00115002
					48	-0.00034339		48	-0.000575688		48	-6.72718e-06		48	0.00112878		48	-0.00138228		48	-0.000400099
					49	-0.00137392		49	-0.000479521		49	-0.000535384		49	-0.000115167		49	-9.51383e-05		49	0.000267277
					50	8.82772e-05		50	-0.00163003		50	-0.000640918		50	-0.00014613		50	0.000527743		50	-0.000426943
					51	-7.37256e-05		51	-0.00167783		51	-7.27117e-05		51	0.00103899		51	0.000393599		51	-0.000598623
					52	-0.00223137		52	-0.00128352		52	-0.00074034		52	0.000189693		52	0.000799592		52	0.000451259
					53	-0.0015572		53	-0.000427737		53	0.000301033		53	-0.00153564		53	0.00203281		53	-0.000854601
					54	0.00017971		54	0.000138874		54	-0.000102421		54	-0.000160302		54	0.00197026		54	-0.00179972
					55	0.00147108		55	0.00126565		55	-9.36559e-05		55	-0.00150621		55	0.00148888		55	-0.000738712
					56	-0.000508994		56	0.00183191		56	0.000949547		56	0.000282478		56	0.00146553		56	-0.00182358
					57	0.00161428		57	0.000786957		57	0.000768458		57	0.00046295		57	0.001177		57	-0.000545342
					58	0.000779764		58	1.00826e-05		58	-0.000392469		58	0.000791971		58	-0.000710002		58	0.000787596
					59	-0.00030299		59	-0.000669442		59	-0.000416064		59	0.000746224		59	-0.00139884		59	0.00161363
					60	0.00123231		60	-0.000692362		60	-0.000145227		60	8.23116e-05		60	-0.00209296		60	0.00213112
					61	-0.00189241		61	-0.00149323		61	0.000425499		61	-0.000541965		61	0.000845925		61	0.00271233
					62	-0.0015249		62	-0.00286528		62	0.00127251		62	-0.00212189		62	-0.00439786		62	0.00150562
					63	-0.00335749		63	-0.00373615		63	0.00175934		63	-0.00435146		63	-0.0458872		63	-0.00285178
					64	-0.00705022		64	-0.00522585		64	0.00114596		64	-0.00524068		64	-0.129573		64	-0.00924984
					65	-0.0107531		65	-0.00728441		65	0.00136234		65	-0.00616958		65	-0.243825		65	-0.0156786
					66	-0.0158462		66	-0.0110418		66	0.00216845		66	-0.00683816		66	-0.371606		66	-0.020848
					67	-0.0203295		67	-0.0145581		67	0.00203427		67	-0.00642645		67	-0.480044		67	-0.021298
					68	-0.021353		68	-0.0170733		68	0.00215978		68	-0.00477445		68	-0.538972		68	-0.0172286
					69	-0.0194068		69	-0.0170274		69	0.00252495		69	-0.00290218		69	-0.55094		69	-0.0116399
					70	-0.0159809		70	-0.0153604		70	0.00202975		70	-0.00184966		70	-0.529419		70	-0.00608173
					71	-0.0121254		71	-0.0123923		71	0.00232417		71	-0.000526898		71	-0.491808		71	-0.00224418
					72	-0.00656011		72	-0.00861322		72	0.00165818		72	-0.000263911		72	-0.46485		72	-0.0014072
					73	-0.00126523		73	-0.00591306		73	0.000871754		73	-0.000250711		73	-0.446823		73	-0.00232079
					74	0.00173926		74	-0.00526186		74	-0.000225121		74	-0.00169731		74	-0.42941		74	-0.00255492
					75	0.00286333		75	-0.00526964		75	-0.000692468		75	-1.2632e-05		75	-0.409981		75	-0.0032796
					76	0.00345698		76	-0.00502643		76	-0.00177031		76	9.04636e-05		76	-0.389315		76	-0.00284481
					77	0.00287018		77	-0.00424221		77	-0.00188866		77	-0.000396064		77	-0.367805		77	-0.00280052
					78	0.0015229		78	-0.00431703		78	-0.000957533		78	0.000697992		78	-0.345899		78	-0.00129674
					79	0.00059514		79	-0.00363088		79	0.000343044		79	0.00130218		79	-0.32508		79	0.00145654
					80	0.000136865		80	-0.00278377		80	0.00112306		80	0.00162649		80	-0.306117		80	-5.56691e-05
					81	-0.000241939		81	-0.00252573		81	0.000782497		81	0.0017909		81	-0.28835		81	-2.3026e-05
					82	-0.00186129		82	-0.00283677		82	0.00108134		82	0.0019554		82	-0.271101		82	1.35386e-05
					83	-0.0033512		83	-0.00221689		83	0.000919577		83	0.000699992		83	-0.256389		83	5.48928e-05
					84	-0.00443169		84	-0.00154612		84	0.000447191		84	0.000584647		84	-0.244126		84	0.000101202
					85	-0.00432278		85	-0.000794469		85	4.17135e-06		85	0.000679358		85	-0.233651		85	0.000836639
					86	-0.00266719		86	-0.000601945		86	0.000770505		86	0.000494113		86	-0.224295		86	-0.00128317
					87	-0.00265729		87	-0.000958565		87	0.000886179		87	-0.000341099		87	-0.216689		87	-0.00154338
					88	-0.00403976		88	-0.000954342		88	0.000891185		88	0.000603709		88	-0.209392		88	-0.00210397
					89	-0.00239338		89	-0.00134929		89	0.00114551		89	-0.000121475		89	-0.202025		89	-0.00187493
					90	-0.00210766		90	-0.00185342		90	-0.000300853		90	0.000243339		90	-0.194658		90	-1.62469e-05
					91	-0.00180262		91	-0.00134676		91	-0.00127791		91	0.000198139		91	-0.188002		91	0.00123209
					92	-0.000738268		92	-0.0014993		92	-0.00187568		92	4.29141e-05		92	-0.182448		92	0.000450083
					93	-0.000344618		93	-0.00138107		93	-0.00151416		93	0.000327653		93	-0.175834		93	0.000447756
					94	-0.00129168		94	-0.00075208		94	-0.00166336		94	0.000742344		94	-0.169702		94	0.000505117
					95	-0.00134946		95	-0.00170234		95	-0.000143288		95	0.000536978		95	-0.164732		95	0.000342177
					96	-0.000877974		96	-0.00162188		96	0.000796055		96	0.000841543		96	-0.159274		96	0.000348948
					97	-0.000937226		97	-0.00137069		97	0.000674663		97	0.00201603		97	-0.153288		97	0.000745442
					98	-0.000297225		98	-0.00145879		98	0.000152531		98	0.00196043		98	-0.148085		98	0.00168167
					99	-0.00140641		99	-0.00230621		99	-6.03441e-05		99	0.00210472		99	-0.141464		99	0.00149764
					100	-0.0013231		100	-0.00177295		100	0.000216037		100	0.00138891		100	-0.134966		100	0.000323377
					101	-0.00124469		101	-0.00171903		101	-0.000118329		101	0.00152298		101	-0.129911		101	-0.000131122
					102	0.000575168		102	-0.000214458		102	0.000426558		102	0.000776919		102	-0.124159		102	-0.000855841
					103	-0.000328667		103	-0.00134617		103	0.000660697		103	0.00063072		103	-0.11855		103	-0.00132077
					104	-0.00197328		104	-0.00132124		104	0.000334089		104	0.00112437		104	-0.115264		104	-0.00136589
					105	-0.00249869		105	-0.00129493		105	-9.32647e-05		105	0.000234504		105	-0.110412		105	-0.000741197
					106	-0.00172488		106	-0.000639964		106	-0.000381363		106	0.0018312		106	-0.104184		106	-0.000956679
					107	-0.00150187		107	-0.00278236		107	0.000899798		107	0.00111435		107	-0.0987584		107	7.67834e-06
					108	-0.00170965		108	-0.00120747		108	0.00188022		108	0.000297317		108	-0.0922167		108	0.000421885
					109	-0.00126822		109	-0.00117554		109	0.00258991		109	-0.000519908		109	-0.0851786		109	0.000745951
					110	-0.0016676		110	-0.00114233		110	0.00266887		110	-0.00137733		110	-0.079804		110	0.00139989
					111	-0.00168776		111	-0.00110791		111	0.0028271		111	-0.00158497		111	-0.0742629		111	0.00225371
					112	-0.00198873		112	-0.00192615		112	0.00125462		112	-0.00145283		112	-0.0684453		112	0.00117743
					113	-0.00141049		113	-0.00100537		113	-4.85709e-05		113	-0.000870909		113	-0.0647311		113	0.000771052
					114	-0.000303046		114	-0.000304119		114	-0.000442467		114	-0.000579226		114	-0.0600603		114	0.000684591
					115	-0.000246393		115	0.000817602		115	0.000342942		115	-0.000397786		115	-0.0545328		115	-0.000181941
					116	-0.000410528		116	0.000619773		116	0.00197767		116	-0.000366596		116	-0.0509684		116	-0.000128533
					117	-0.00112545		117	0.00085238		117	0.00319171		117	-0.000485663		117	-0.0481671		117	0.00105482
					118	-0.00148115		118	-0.000334592		118	0.0029551		118	-0.000444996		118	-0.0448188		118	0.00142815
					119	-0.00175763		119	-0.000561157		119	0.00317782		119	-0.0013146		119	-0.0420732		119	0.00146144
					120	-0.000744878		120	-0.000637329		120	0.00163991		120	-0.00151449		120	-0.0398202		120	0.00147471
					121	0.000117107		121	-0.000603124		121	-0.000328638		121	-0.00203466		121	-0.0371097		121	0.000767987
					122	0.000858332		122	-0.00133855		122	-0.0014078		122	-0.00122512		122	-0.0335713		122	0.000781265
					123	0.00155881		123	-0.000913638		123	-0.000377565		123	-0.00136589		123	-0.030445		123	0.000874561
					124	0.00127853		124	-0.00115839		124	-0.000267917		124	-0.000486961		124	-0.0282204		124	0.000587884
					125	-0.000232472		125	-0.00106281		125	-0.000658842		125	-0.000438346		125	-0.0263773		125	0.000481247
					126	-0.000384207		126	-2.69385e-05		126	-0.000480323		126	-0.00079005		126	-0.0239255		126	0.00030466
					127	0.000763341		127	0.000589228		127	0.000277656		127	-0.000802081		127	-0.0219646		127	-0.000551867
					128	0.000310181		128	-0.00012433		128	-7.48863e-05		128	-0.000574442		128	-0.0191944		128	-0.00152832
					129	-0.000193676		129	2.37367e-06		129	0.000192068		129	-0.000927141		129	-0.0166046		129	-0.00138469
					130	0.000351781		130	0.000119323		130	0.00177854		130	-0.00216018		130	-0.0139447		130	-0.000320971
					131	-0.000173435		131	-0.0010935		131	0.00216454		131	-0.00170357		131	-0.0122045		131	0.000902855
					132	-0.000479313		132	-0.0015361		132	0.0019301		132	-0.000264503		132	-0.0103935		132	0.0020768
					133	0.00040416		133	-0.000408499		133	0.000935238		133	-0.000265303		133	-0.00983148		133	0.00273086
					134	0.000626999		134	0.000229287		134	-0.000260027		134	-0.00183589		134	-0.00940792		134	0.00237507
					135	0.000659218		135	-0.000232754		135	-0.000965671		135	-0.000120728		135	-0.00978244		135	0.00043942
					136	0.000490831		136	0.000665362		136	-0.00193167		136	0.000224061		136	-0.00901459		136	-0.00164607
					137	0.000501854		137	0.00019362		137	0.000121462		137	0.00144847		137	-0.00868392		137	-0.00300139
					138	-8.76968e-05		138	-0.001338		138	0.000102874		138	-0.000254102		138	-0.00798997		138	-0.00298653
					139	0.000172196		139	-0.0015895		139	-0.000491558		139	-0.000249079		139	-0.00678224		139	-0.00214148
					140	0.000661548		140	-0.000900902		140	-0.000268733		140	-0.000243216		140	-0.00506024		140	-0.000106236
					141	0.000600379		141	-0.00147222		141	0.00108386		141	0.00141223		141	-0.00439344		141	0.000229224
					142	9.87058e-05		142	-0.00100348		142	3.68015e-05		142	0.000714685		142	-0.00381131		142	0.000244907
					143	0.000406549		143	0.000435318		143	2.25773e-05		143	0.000176733		143	-0.00335329		143	4.08211e-05
					144	-8.60726e-05		144	0.000134152		144	0.00134056		144	0.00102837		144	-0.00290882		144	-0.00110302
					145	-0.000339138		145	0.000243008		145	0.00110253		145	0.000399602		145	-0.0024773		145	-0.00179661
					146	0.000557373		146	0.000251872		146	-3.55934e-05		146	0.000200417		146	-0.00161814		146	-0.00185994
					147	0.000283483		147	-0.000419274		147	-0.000903765		147	0.000430814		147	-0.000510708		147	-0.00104299
					148	-0.000650787		148	-0.00112044		148	-0.00172196		148	0.000330791		148	0.000515624		148	-0.00108575
					149	-0.000305414		149	-0.00174165		149	-0.00214014		149	0.000280344		149	0.00181151		149	0.000471775
					150	-0.000100374		150	-0.00179291		150	-0.00148827		150	0.000499471		150	0.00316763		150	-2.03914e-05
					151	0.000354357		151	-0.000634242		151	-0.00045633		151	0.00155817		151	0.00376466		151	0.000517758
					152	0.000968802		152	0.00132434		152	-0.000834273		152	0.00120644		152	0.00340331		152	-0.000623766
					153	0.000752988		153	7.68257e-05		153	-0.00111207		153	0.000704269		153	0.0029843		153	-0.00140495
					154	-0.00032306		154	8.2602e-05		154	-0.000869676		154	0.000491666		154	0.00369836		154	-0.0031858
					155	-0.000589315		155	0.00209944		155	-0.00117706		155	0.000318625		155	0.00335625		155	-0.00320628
					156	-0.00100575		156	0.00115753		156	-0.00140419		156	-0.000534856		156	0.00326875		156	-0.0024764
					157	-0.00108234		157	3.54577e-05		157	5.89798e-05		157	-0.000238779		157	0.00431663		157	-0.00180614
					158	-0.000269054		158	-0.000276789		158	0.000352487		158	0.000626855		158	0.00487071		158	3.4509e-05
					159	0.00182414		159	0.000260772		159	0.000316369		159	0.000762045		159	0.0035718		159	0.00149555
					160	8.08866e-05		160	0.000798125		160	-0.000649331		160	0.00117679		160	0.00328073		160	0.00150701
					161	7.37802e-05		161	3.52547e-05		161	-4.45739e-05		161	0.00149108		161	0.00327838		161	0.000888876
					162	6.63274e-05		162	0.000192145		162	-0.000419317		162	0.00090493		162	0.0022556		162	0.00147117
					163	0.00182653		163	-2.122e-05		163	0.000396482		163	0.000358328		163	0.00276329		163	0.00142391
					164	0.000329698		164	0.000335145		164	0.000532865		164	0.000241276		164	0.00272235		164	0.000437092
					165	-0.000567049		165	-0.000288777		165	0.000809878		165	-0.000186227		165	0.0029637		165	0.000580733
					166	-0.00156367		166	-0.000423		166	0.000297565		166	-0.00140418		166	0.00320827		166	0.000504842
					167	2.5222e-05		167	-0.00090754		167	0.000525971		167	-0.00121259		167	0.00269703		167	-0.00131057
					168	1.65136e-05		168	-0.000552414		168	0.000305142		168	-0.00114144		168	0.00118095		168	-0.0026055
					169	7.73994e-06		169	-0.000727637		169	0.000315125		169	-0.00120075		169	0.001181		169	-0.00162992
					170	-0.000768266		170	-0.000553225		170	0.000855968		170	-0.000190513		170	0.000438211		170	-0.00162385
					171	-0.000663762		171	-8.91932e-05		171	0.000547718		171	0.00153928		171	0.000253588		171	-0.00068725
					172	-0.000778924		172	-0.000265558		172	-0.000139575		172	0.000143396		172	0.000608174		172	0.00108987
					173	-0.000133716		173	-0.000652335		173	-0.000945862		173	0.0010275		173	0.00100302		173	0.00171753
					174	0.000351901		174	-0.00021954		174	-0.00104109		174	-0.000254063		174	0.000179209		174	0.000245742
					175	0.000627964		175	0.00053281		175	-0.00122522		175	-0.00145607		175	-6.21812e-05		175	-0.000235495
					176	0.000884514		176	0.0010047		176	-0.000578179		176	0.000179677		176	-0.00167004		176	-0.000916166
					177	-5.94557e-05		177	0.00111611		177	0.000230069		177	0.000186843		177	-0.00224325		177	-0.00092626
					178	0.00124923		178	0.00164704		178	0.00134958		178	-0.00170479		178	-0.00267067		178	-0.00101577
					179	0.00130748		179	0.000187452		179	0.00149041		179	-0.000838587		179	-0.000991136		179	-0.000454683
					180	0.000606373		180	-0.000382658		180	0.00177262		180	-0.000552825		180	-0.000823488		180	0.00125701
					181	3.59589e-05		181	-0.000733308		181	0.000856255		181	0.000112496		181	0.000323469		181	0.00130931
					182	-0.000123722		182	1.54863e-05		182	0.000591374		182	0.000307378		182	0.000590939		182	0.00102224
					183	-0.000672627		183	-0.000116292		183	0.000278035		183	0.000791823		183	0.000730146		183	0.0019358
					184	-0.00147071		184	0.00064134		184	0.000336295		184	0.00185583		184	-0.000947672		184	0.00290001
					185	-0.00112793		185	0.000818368		185	0.000546213		185	0.00159941		185	-0.000481258		185	0.00196487
					186	-0.000884241		186	0.00108478		186	0.000847846		186	2.55893e-06		186	-0.00021934		186	0.00171039
					187	-0.000919595		187	-0.000189455		187	0.00109126		187	-0.000444721		187	-0.000190628		187	0.00149658
					188	0.000116052		188	-0.000514338		188	0.0010865		188	-0.000922425		188	-0.000353816		188	0.000763451
					189	0.000132748		189	-0.000169892		189	0.000563644		189	0.000189237		189	-0.000157582		189	-1.89866e-05
					190	-0.00070946		190	-0.000936131		190	-0.000367255		190	-0.000479097		190	-0.00135058		190	0.000389276
					191	-0.000350523		191	-0.00201307		191	-0.000146133		191	0.00141194		191	-0.00314147		191	0.00122825
					192	-0.000590394		192	-0.00166073		192	-0.000382926		192	0.00160257		192	-0.00408886		192	0.00178794
					193	-0.000379022		193	-0.00113913		193	-0.00151757		193	0.000592785		193	-0.00426137		193	0.00113835
					194	0.000563643		194	-0.00124828		194	-0.000920002		194	1.25969e-05		194	-0.00481759		194	0.00130951
					195	0.00144765		195	-0.000228192		195	-1.0156e-05		195	-0.000997993		195	-0.0050961		195	0.000871407
					196	0.00152305		196	0.000421108		196	-2.79656e-05		196	-0.00137898		196	-0.00492546		196	0.000194063
					197	0.000789899		197	0.000669607		197	-0.000713364		197	-0.00114036		197	-0.00423421		197	-0.000572517
					198	0.000178244		198	-0.000152711		198	6.37154e-05		198	2.78666e-05		198	-0.00358087		198	-0.000298323
					199	-0.00065186		199	0.000114136		199	-0.000166658		199	0.00037571		199	-0.00213397		199	-0.00123335
					200	-0.00136036		200	0.000160133		200	-0.00123442		200	0.000673173		200	-0.000641981		200	-0.00115758
					201	-0.0007672		201	0.00111526		201	-0.00186949		201	-9.74084e-06		201	0.000196607		201	-0.00106101
					202	-0.000792326		202	0.000909508		202	-0.000971809		202	0.000356974		202	0.000583339		202	-0.00125363
					203	-0.000805684		203	0.000732854		203	-0.000801302		203	0.000393322		203	0.000689772		203	-0.00144543
					204	-0.000167217		204	0.000445282		204	-7.78959e-05		204	0.000849309		204	0.00057748		204	-0.000876398
					205	0.000283131		205	-0.000243224		205	0.00078848		205	0.000704939		205	0.00222805		205	-0.000616533
					206	-0.000184582		206	-0.000762681		206	0.0011379		206	0.000340218		206	0.0033331		206	-0.000765821
					207	0.000629702		207	-0.000273105		207	0.000520436		207	-4.84829e-06		207	0.00344424		207	-0.000504253
					208	0.000726041		208	-0.000104513		208	0.00111616		208	-0.000900255		208	0.00318312		208	-0.000181822
					209	0.000334493		209	0.000193078		209	0.000175159		209	-0.000315996		209	0.00347139		209	0.000211483
					210	0.00100512		210	0.000639651		210	-0.000312502		210	-0.000322065		210	0.00286074		210	-1.433e-05
					211	0.00032105		211	0.00164146		211	-0.00100661		211	-0.000253597		211	0.000417025		211	0.000642933
					212	0.000631385		212	0.00228758		212	-0.00168186		212	-0.000697457		212	-0.00193077		212	0.000975593
					213	-0.001229		213	0.00241502		213	-0.00440384		213	-0.00201159		213	-0.036274		213	-0.00176198
					214	-0.00463012		214	0.000283807		214	-0.00477235		214	-0.00556601		214	-0.110973		214	-0.00694973
					215	-0.010292		215	-0.00359606		215	-0.00389715		215	-0.00992073		215	-0.213429		215	-0.0119776
					216	-0.0154946		216	-0.00908456		216	-0.00147803		216	-0.0122157		216	-0.334431		216	-0.0174856
					217	-0.0195179		217	-0.0140117		217	0.00463521		217	-0.0133711		217	-0.438592		217	-0.0198837
					218	-0.0199821		218	-0.0166275		218	0.0124028		218	-0.0121768		218	-0.49544		218	-0.0179018
					219	-0.0184969		219	-0.0172718		219	0.0173448		219	-0.0103128		219	-0.504067		219	-0.0131298
					220	-0.0145726		220	-0.0147248		220	0.0201716		220	-0.00808912		220	-0.480923		220	-0.00833784
					221	-0.00943902		221	-0.0111264		221	0.0196933		221	-0.00660582		221	-0.436978		221	-0.00370575
					222	-0.00604623		222	-0.00725667		222	0.01349		222	-0.00665289		222	-0.401114		222	-0.00123353
					223	-0.00320423		223	-0.00569549		223	0.00480202		223	-0.00671032		223	-0.377829		223	-0.000421148
					224	-0.000143013		224	-0.00287292		224	-0.0032206		224	-0.00650812		224	-0.360226		224	-0.000428565
					225	0.00221741		225	-0.00141894		225	-0.0104677		225	-0.00601631		225	-0.342544		225	-0.00122575
					226	0.00333703		226	-0.000533573		226	-0.016359		226	-0.00515487		226	-0.324584		226	-0.00157267
					227	0.00145027		227	-0.000576806		227	-0.0195745		227	-0.00343383		227	-0.306845		227	-0.00314928
					228	0.00310387		228	5.13547e-05		228	-0.018684		228	-0.00317317		228	-0.287809		228	-0.00330557
					229	0.00259109		229	-0.00112909		229	-0.0164874		229	-0.00362292		229	-0.268566		229	-0.0021015
					230	0.000947501		230	-0.00163815		230	-0.0130645		230	-0.00291306		230	-0.251136		230	0.000172964
					231	-0.000526895		231	-0.00146583		231	-0.00979516		231	-0.0027436		231	-0.23432		231	-0.000968207
					232	-0.0009721		232	-0.000402129		232	-0.00680937		232	-0.00368454		232	-0.218988		232	-0.00102916
					233	0.000538953		233	-0.000527057		233	-0.00684697		233	-0.00341589		233	-0.206299		233	-0.00108015
					234	0.000426388		234	-0.000130621		234	-0.00686785		234	-0.00277764		234	-0.194506		234	-0.00112117
					235	-0.00103257		235	0.000747171		235	-0.00825191		235	-0.00290979		235	-0.183577		235	0.000412084
					236	8.99779e-06		236	0.00091631		236	-0.00926906		236	-0.00425235		236	-0.175313		236	-0.00199055
					237	0.000629754		237	0.000506785		237	-0.0101192		237	-0.0038053		237	-0.168144		237	-0.00366261
					238	0.00160971		238	0.000978587		238	-0.0100623		238	-0.00388866		238	-0.161891		238	-0.00118458
					239	0.00174885		239	0.000661702		239	-0.0105883		239	-0.00331242		239	-0.156614		239	-0.00376493
					240	-0.000202797		240	-0.00012388		240	-0.010887		240	-0.00243657		240	-0.152993		240	-0.00377515
					241	-0.00104525		241	-0.000538175		241	-0.0107184		241	-0.000221112		241	-0.149008		241	-0.00331471
					242	-0.00159849		242	-0.000771195		242	-0.00999251		242	-8.60423e-05		242	-0.145109		242	-0.0023936
					243	-0.000208761		243	-0.000452957		243	-0.00825922		243	0.000148644		243	-0.141238		243	-0.00180179
					244	-0.00024722		244	-4.3477e-05		244	-0.0069085		244	-0.000297047		244	-0.136903		244	-0.00167928
					245	-0.00142295		245	-0.000852771		245	-0.00649031		245	-0.000503111		245	-0.131535		245	-0.000816037
					246	-0.00101933		246	-0.00188086		246	-0.00615462		246	-0.00046954		246	-0.127424		246	0.000607945
					247	-0.00220648		247	-0.00235776		247	-0.0081214		247	0.000423671		247	-0.123091		247	0.000912683
					248	-0.0012244		248	-0.000499245		248	-0.0127706		248	0.000966531		248	-0.118615		248	0.00132819
					249	2.69148e-05		249	-0.00051513		249	-0.0182823		249	0.00110905		249	-0.114997		249	0.00187448
					250	0.000607479		250	-0.00156152		250	-0.0233664		250	0.000381227		250	-0.112346		250	0.000911566
					251	0.000197296		251	-0.00105387		251	-0.0295229		251	-0.000296919		251	-0.108363		251	-0.000470544
					252	0.000806372		252	-0.00122514		252	-0.0335319		252	-0.000395382		252	-0.103458		252	-0.000731838
					253	0.000604716		253	-0.000685348		253	-0.0351433		253	-0.000624151		253	-0.0984304		253	-0.00105231
					254	-0.000667666		254	-0.000754527		254	-0.0346171		254	-0.000683215		254	-0.0925811		254	-0.00152194
					255	-0.00129076		255	-0.0010127		255	-0.0327234		255	0.000277435		255	-0.0862298		255	-0.00111074
					256	-0.000764568		256	-0.000899893		256	-0.0300922		256	0.000787814		256	-0.0808065		256	-0.000328682
					257	0.000150929		257	-0.00109613		257	-0.0283636		257	0.00102793		257	-0.0771712		257	-0.000595775
					258	0.000215737		258	-0.00114145		258	-0.0277475		258	0.0012478		258	-0.073524		258	-0.000162008
					259	0.00109987		259	-0.00110588		259	-0.0266141		259	0.00112744		259	-0.0703148		259	0.000342621
					260	0.00108333		260	-0.00119944		260	-0.0252333		260	0.00156686		260	-0.0675735		260	0.000618117
					261	0.00147613		261	-0.000172167		261	-0.0234353		261	0.00109607		261	-0.0637303		261	-2.55188e-05
					262	0.000858291		262	0.000435904		262	-0.0201501		262	0.0011751		262	-0.059185		262	0.000691716
					263	-0.000270186		263	-8.52577e-05		263	-0.0161777		263	0.00139395		263	-0.0544275		263	0.00062982
					264	-0.000659284		264	0.000234314		264	-0.0125883		264	0.00185264		264	-0.0499477		264	0.000828796
					265	-0.000678992		265	0.000694583		265	-0.00814186		265	0.0019212		265	-0.0453057		265	-0.00026136
					266	-0.000269297		266	-0.000364173		266	-0.00305857		266	0.00250963		266	-0.0409513		266	-0.000820648
					267	0.000819814		267	-0.000335618		267	0.00240152		267	0.00240796		267	-0.0379643		267	-0.000939071
					268	-1.60375e-05		268	-0.000306273		268	0.0081483		268	0.0027762		268	-0.0365847		268	-0.00113663
					269	0.00176634		269	0.00143192		269	-0.0063684		269	0.00285437		269	-0.0351724		269	-0.00182334
					270	0.00188378		270	0.000815127		270	0.00991153		270	0.0027525		270	-0.0336371		270	-0.000219197
					271	0.0010007		271	-0.000931193		271	0.00718774		271	0.0019506		271	-0.0323586		271	0.000415791
					272	0.000637106		272	-0.000947084		272	0.00433019		272	0.0007987		272	-0.029797		272	0.000121616
					273	0.000203016		273	0.000207414		273	0.00192874		273	-0.000173188		273	-0.0258718		273	0.000698271
					274	7.84471e-05		274	0.00167226		274	0.00210326		274	0.000574962		274	-0.022963		274	0.000945745
					275	-0.000736585		275	0.0019074		275	0.00450361		275	0.000713172		275	-0.0199404		275	0.00096403
					276	-0.000692064		276	-6.81744e-05		276	0.00723965		276	9.1467e-05		276	-0.0179236		276	0.00167311
					277	0.000180273		277	0.00188842		277	0.0080612		277	0.00108987		277	-0.0169925		277	0.00104298
					278	-0.00152429		278	0.0010742		278	0.00833813		278	0.0021084		278	-0.0163768		278	-0.000146367
					279	-0.001211		279	-0.000359904		279	0.00834025		279	0.000757094		279	-0.0157062		279	-1.49577e-05
					280	-0.000738087		280	-0.000313936		280	0.0069174		280	-1.40334e-05		280	-0.0146106		280	-1.28003e-05
					281	-0.000925528		281	-0.00124795		281	0.00562941		281	0.000805048		281	-0.0134295		281	-0.00092991
					282	-0.000363306		282	8.17775e-05		282	0.00461608		282	0.000114363		282	-0.0112026		282	0.000613697
					283	-0.0006214		283	0.000102568		283	0.00393723		283	-0.00115606		283	-0.00978978		283	0.000118005
					284	-0.000719791		284	-0.00184036		284	0.00213266		284	-0.000816192		284	-0.00855055		284	-0.000767006
					285	-0.00102846		285	0.000140031		285	0.00168216		285	-5.60072e-05		285	-0.00790463		285	-0.000671352
					286	-0.000427378		286	0.000156632		286	0.000755541		286	-0.000885476		286	-0.00720164		286	0.000774946
					287	0.000453467		287	-0.00105442		287	0.000852576		287	-0.00111457		287	-0.00701123		287	0.000131869
					288	0.0007841		288	-0.00141973		288	-0.000706952		288	-0.000193255		288	-0.00654302		288	0.00155939
					289	0.00114454		289	-0.000655442		289	-0.00121327		289	0.000718495		289	-0.00549662		289	0.0022575
					290	0.00180482		290	0.00101839		290	-0.00197661		290	0.000790713		290	-0.00456162		290	0.00133617
					291	0.00164495		291	0.0016517		291	-0.00158721		291	0.00153343		291	-0.00330762		291	-8.46368e-05
					292	0.00122496		292	0.00124444		292	-0.00224531		292	0.00110668		292	-0.00288417		292	0.000575071
					293	0.000444879		293	0.00138654		293	-0.00162116		293	-0.000149511		293	-0.00196083		293	0.000255264
					294	0.00081472		294	0.00081794		294	-0.000815025		294	-0.000945101		294	-0.00151716		294	0.000185914
					295	0.000174513		295	0.000528587		295	5.28391e-05		295	2.58645e-05		295	-0.00113269		295	-0.000493006
					296	-3.57167e-05		296	0.000328413		296	-0.00111784		296	-1.72362e-06		296	-0.000686934		296	-0.000421524
					297	0.000594055		297	0.000297357		297	-0.000537325		297	-0.00169795		297	-0.000719402		297	-0.000899668
					298	0.00102385		298	0.000365353		298	-0.000875908		298	-0.000530802		298	-0.00076959		298	-0.000617469
					299	-7.62916e-05		299	0.000302337		299	-0.00115387		299	7.11478e-06		299	-0.00042698		299	-0.000794957
					300	-0.000196357		300	-0.000291757		300	-0.00190151		300	0.000455841		300	0.000468959		300	0.000587836
					301	-0.000656316		301	-0.000336995		301	-0.00146911		301	0.000905413		301	0.00094877		301	0.00116088
					302	-0.00111614		302	-0.00119345		302	-0.00108699		302	-0.000123319		302	0.00243301		302	0.000694133
					303	-5.57997e-05		303	-0.00153118		303	-0.000715455		303	-0.00013638		303	0.00379224		303	0.00139757
					304	0.000864731		304	-0.00110026		304	-0.00054482		304	-0.000147451		304	0.00461705		304	0.00165115
					305	0.00188548		305	-0.00108076		305	-0.000385408		305	0.00123294		305	0.00433803		305	0.00152484
					306	0.000135321		306	-0.000632755		306	0.000132453		306	0.00118732		306	0.00431578		306	0.00124861
					307	0.00171776		307	0.000613688		307	-0.00121157		307	0.000372787		307	0.00533094		307	0.00110241
					308	0.000499339		308	0.00106849		308	-0.00143782		308	1.93775e-05		308	0.00598411		308	-0.000323793
					309	-0.000338739		309	0.00159159		309	-0.000626643		309	0.000437133		309	0.00668597		309	-0.00126004
					310	-0.00107645		310	0.0017929		310	-0.000858389		310	0.000226096		310	0.00671714		310	-0.000926369
					311	-0.00164376		311	0.00143235		311	-0.00171342		311	-0.00021369		311	0.00700832		311	0.000147177
					312	3.58746e-05		312	0.00129986		312	-0.00131209		312	-0.000702183		312	0.00499018		312	0.000940556
					313	-0.00189705		313	0.00123536		313	-0.000874784		313	-0.000969337		313	0.00415341		313	0.00170373
					314	-0.000892973		314	0.000598767		314	-0.00227187		314	-0.00177511		314	0.00381873		314	0.00271664
					315	0.000171634		315	0.000700001		315	-0.00256373		315	-0.000539453		315	0.00432685		315	0.00202926
					316	5.68019e-05		316	0.000268982		316	-0.00200075		316	-0.000552323		316	0.00360851		316	0.000141534
					317	0.000592564		317	-8.43691e-05		317	-0.00100333		317	-0.000113674		317	0.00372446		317	-0.000946582
					318	0.000108954		318	-0.000930135		318	-0.00112188		318	-0.000473457		318	0.00297544		318	-0.00195514
					319	-0.000613994		319	-0.000478398		319	0.00010322		319	1.83731e-05		319	0.00185224		319	-0.00194418
					320	-0.00172624		320	-0.000519243		320	0.00131154		320	-0.000828134		320	0.000675628		320	-0.00161375
					321	-0.000237763		321	1.72477e-05		321	0.00222266		321	-0.00103293		321	-0.000213587		321	-0.00202391
					322	0.000651486		322	-0.000349013		322	0.00177616		322	-0.00151597		322	-0.0003846		322	-0.0026947
					323	0.00172154		323	8.18898e-05		323	0.000721617		323	-0.00132719		323	-0.00113659		323	-0.00277619
					324	-0.000161552		324	-0.000170132		324	-0.000621417		324	-0.00124656		324	-0.00186872		324	-0.00242841
					325	-0.000174992		325	-0.000305166		325	-0.000743379		325	-0.000954017		325	-0.00174014		325	-0.00307142
					326	-0.00016312		326	-0.000793301		326	-0.00126472		326	-0.000729511		326	-0.000780004		326	-0.00111528
					327	-0.000479487		327	-0.000544626		327	-0.00061589		327	-0.000652991		327	-0.000777426		327	0.000559951
					328	-0.00130487		328	0.000310767		328	0.000682646		328	-0.000194404		328	-0.000681524		328	0.00215423
					329	-0.00170922		329	0.000302786		329	0.00146042		329	0.0010063		329	-0.000801402		329	0.00126749
					330	-0.0015725		330	0.00095134		330	0.00232697		330	0.000659182		330	-0.00178615		330	0.00137967
					331	-0.00103469		331	0.00118633		331	0.00332181		331	0.000654289		331	-0.00352484		331	0.000560728
					332	-0.000755722		332	0.000537677		332	0.00315445		332	0.00148168		332	-0.00319654		332	0.000470591
					333	-0.000475575		333	0.000375271		333	0.00285441		333	0.00157141		333	-0.0033503		333	0.000159202
					334	-2.42035e-05		334	-0.000350979		334	0.00250119		334	0.000433526		334	-0.00241516		334	0.0005965
					335	0.000548433		335	-0.00118117		335	0.00240429		335	0.0010281		335	-0.00210015		335	0.000332422
					336	0.000992377		336	-0.000895401		336	0.00193319		336	0.00112517		336	-0.00186428		336	0.000446905
					337	0.000417668		337	-0.000363769		337	0.00140739		337	0.000194818		337	-0.00248654		337	0.000349886
					338	-0.000395652		338	-0.000656374		338	0.00175636		338	-0.000182917		338	-0.00252593		338	-0.0009187
					339	-0.00104754		339	-3.3317e-05		339	0.00270957		339	3.20299e-05		339	-0.00331143		339	-0.00199892
					340	-0.000837951		340	-0.000264699		340	0.0023065		340	-0.000260282		340	-0.00348199		340	-0.00115084
					341	-0.000836846		341	-0.00127062		341	0.00265661		341	1.02063e-05		341	-0.00303657		341	-0.000784523
					342	-0.00103418		342	-0.000461188		342	0.00336935		342	0.000803556		342	-0.0024241		342	-0.000370043
					343	-0.000469906		343	-0.000746503		343	0.00323416		343	0.000659828		343	-0.00180351		343	0.000672532
					344	-0.000323984		344	-0.00169667		344	0.0022205		344	0.000449083		344	-0.00129371		344	0.00155313
					345	-0.000276368		345	-0.0010618		345	0.00177781		345	-0.000348615		345	-0.000723602		345	0.00125169
					346	0.000242988		346	-0.00023199		346	0.000565501		346	-3.32056e-05		346	-0.000672067		346	0.00073813
					347	0.00127413		347	-0.000237356		347	-0.000726987		347	-0.000284624		347	-0.000767982		347	-0.000457619
					348	0.0012671		348	0.000581998		348	-0.00119024		348	0.000367193		348	-0.00132021		348	-0.00153563
					349	0.000941952		349	0.00147596		349	-0.000924837		349	0.00012231		349	-0.00179759		349	-0.000685981
					350	0.000858726		350	0.00121442		350	-0.000901378		350	0.00124079		350	-0.00143898		350	-0.00109874
					351	0.000387471		351	0.000877271		351	-0.00055046		351	-0.000777296		351	-0.000323175		351	-0.000333994
					352	0.000148236		352	0.000804397		352	0.000167312		352	-0.00151189		352	0.000110994		352	-0.00013181
					353	0.000501067		353	0.000375685		353	0.000961329		353	7.74e-07		353	0.000794737		353	0.000707731
					354	0.00125601		354	-0.000258977		354	0.000500973		354	-0.000920315		354	0.00156927		354	0.000184549
					355	0.000283124		355	-6.97036e-05		355	8.56209e-05		355	7.59852e-05		355	0.00144581		355	0.000878566
					356	0.000352448		356	0.000723389		356	-0.000295355		356	-0.000117791		356	0.00130561		356	0.000509701
					357	-0.000175965		357	-2.98165e-05		357	-0.00103259		357	-0.000166211		357	0.00155991		357	0.000287873
					358	-0.000792066		358	-0.000399436		358	-0.00270672		358	0.000717758		358	0.00243999		358	0.000562998
					359	-0.000735803		359	-3.5588e-05		359	-0.0039384		359	-0.000790461		359	0.00328712		359	0.000364996
					360	-0.000337127		360	-1.83919e-05		360	-0.00531828		360	-0.00189464		360	0.00454259		360	0.00038378
					361	0.000750651		361	-0.000700935		361	-0.00288818		361	-0.00315931		361	0.00183943		361	-0.000443679
					362	3.7685e-05		362	-0.00192502		362	-0.00278162		362	-0.00292193		362	-0.00164559		362	-0.000835379
					363	-0.00227556		363	-0.00245892		363	-0.00397528		363	-0.00424451		363	-0.0370839		363	-0.00487676
					364	-0.00560909		364	-0.00423264		364	-0.00453912		364	-0.00683708		364	-0.108756		364	-0.0088578
					365	-0.0102729		365	-0.0074262		365	-0.00223309		365	-0.0103196		365	-0.205003		365	-0.0142885
					366	-0.016507		366	-0.0116096		366	0.000722842		366	-0.0132421		366	-0.314624		366	-0.0192889
					367	-0.0196213		367	-0.0154928		367	0.00514872		367	-0.0152947		367	-0.40668		367	-0.0212689
					368	-0.0204659		368	-0.0187159		368	0.0122946		368	-0.0148772		368	-0.450782		368	-0.0179585
					369	-0.0191708		369	-0.0191388		369	0.0176405		369	-0.0135597		369	-0.45099		369	-0.0146577
					370	-0.0153459		370	-0.0177716		370	0.0191864		370	-0.0119922		370	-0.421575		370	-0.00997661
					371	-0.00982128		371	-0.0130642		371	0.0189624		371	-0.0101347		371	-0.374457		371	-0.00494508
					372	-0.00516691		372	-0.00846675		372	0.0144486		372	-0.00884729		372	-0.338056		372	-0.00140315
					373	-0.00089278		373	-0.00482914		373	0.00677497		373	-0.00765983		373	-0.314103		373	-0.000310818
					374	0.00192111		374	-0.00357142		374	-0.000748473		374	-0.00679239		374	-0.293839		374	-0.000458066
					375	0.00376477		375	-0.00168358		375	-0.00698167		375	-0.00592496		375	-0.276273		375	-0.000644889
					376	0.00427821		376	-0.00224564		376	-0.00540852		376	-0.00539755		376	-0.259295		376	-0.00162128
					377	0.00370142		377	-0.0023276		377	-0.00725649		377	-0.00406015		377	-0.241228		377	-0.00248723
					378	0.00354442		378	-0.00309947		378	-0.00833099		378	-0.00390278		378	-0.22385		378	-0.000309305
					379	0.00245721		379	-0.00304126		379	-0.0100613		379	-0.00253543		379	-0.207441		379	-0.00179779
					380	0.0026098		380	-0.00380297		380	-0.0060928		380	-0.000908097		380	-0.191723		380	-0.00137238
					381	0.0017822		381	-0.00308462		381	-0.00328381		381	0.000559213		381	-0.177936		381	-0.000796499
					382	0.00193441		382	-0.00215621		382	-0.00749868		382	0.000276501		382	-0.16639		382	-0.000380147
					383	0.000876435		383	-0.00146775		383	-0.0067642		383	0.000183767		383	-0.156485		383	-0.000793315
					384	0.000858293		384	-0.00070925		384	-0.00281385		384	-0.00129899		384	-0.148912		384	-0.001496
					385	-0.000550013		385	-0.000890714		385	-0.00433276		385	-0.00219176		385	-0.142981		385	-0.00151818
					386	-0.000168475		386	-0.00161215		386	-0.00568106		386	-0.00251455		386	-0.137891		386	-0.00137987
					387	-0.000567083		387	-0.00241357		387	-0.00631873		387	-0.00243737		387	-0.132384		387	-0.00262106
					388	-0.00025583		388	-0.00233499		388	-0.00633574		388	-0.00221019		388	-0.12824		388	-0.00192173
					389	-0.0012047		389	-0.00179641		389	-0.00704206		389	-0.00125303		389	-0.123428		389	-0.00113189
					390	-0.0015737		390	-0.00127784		390	-0.00780765		390	-0.00102589		390	-0.118049		390	-0.000941521
					391	0.000320399		391	-0.000429285		391	-0.0061825		391	-0.00115875		391	-0.113054		391	-0.00108063
					392	0.000268513		392	-0.00223077		392	-0.00473657		392	-0.00170162		392	-0.109822		392	-0.0010092
					393	0.000224674		393	-0.00260228		393	-0.00438984		393	-0.00214449		393	-0.106623		393	-0.00276724
					394	0.000187748		394	-0.00374385		394	-0.00381229		394	-0.00295736		394	-0.104569		394	-0.000664537
					395	-0.00120013		395	-0.00346548		395	-0.00339388		395	-0.00311023		395	-0.101478		395	-0.00309169
					396	-3.96384e-05		396	-0.00365718		396	-0.00348459		396	-0.00158309		396	-0.0990021		396	-0.00209809
					397	0.00159081		397	-0.00164897		397	-0.0034844		397	-0.000535942		397	-0.09595		397	-0.000443938
					398	9.05127e-05		398	-0.00105084		398	-0.00311328		398	-8.77616e-06		398	-0.0923523		398	0.00110078
					399	7.50723e-05		399	-0.00118281		399	-0.00299121		399	0.00106841		399	-0.0886491		399	-0.00060601
					400	6.20069e-05		400	-0.0011249		400	-0.00168816		400	0.00111562		400	-0.0872206		400	0.0015119
					401	0.00204235		401	-0.00209712		401	-0.000744117		401	-0.000787133		401	-0.0851969		401	0.00125832
					402	0.000812731		402	-0.00211947		402	-0.000819053		402	-0.00163985		402	-0.0824581		402	0.000675308
					403	0.000423137		403	-0.00238197		403	-0.000602948		403	-0.000632529		403	-0.0785741		403	0.000652878
					404	-0.00022642		404	-0.00107462		404	-0.00106578		404	-0.000245156		404	-0.0741352		404	0.000561029
					405	0.000824074		405	-0.00111745		405	-0.00190753		405	-0.000147729		405	-0.0685613		405	-2.02361e-05
					406	0.00016463		406	-0.00021046		406	-0.00303817		406	-0.000320239		406	-0.0633625		406	0.000429087
					407	0.000155263		407	8.63347e-05		407	-0.00288769		407	-0.00057268		407	-0.0592589		407	0.000739
					408	0.000245987		408	0.000872921		408	-0.00225607		408	-0.00144505		408	-0.0568205		408	0.000229507
					409	0.000626815		409	-0.000140712		409	-0.000993286		409	-0.00100733		409	-0.0548772		409	0.000160609
					410	-0.00104224		410	0.000265422		410	-0.00110932		410	-0.000619514		410	-0.0528492		410	0.000512309
					411	-0.000761156		411	0.00051131		411	-4.15944e-06		411	-6.16025e-05		411	-0.0514463		411	0.000394609
					412	0.00122007		412	0.00058694		412	-0.000217782		412	7.64174e-05		412	-0.0487086		412	0.000157511
					413	-1.89599e-05		413	0.000222298		413	-0.000430172		413	0.000954555		413	-0.0450761		413	-6.89826e-05
					414	0.00145304		414	-0.000362629		414	9.86855e-05		414	0.000482818		414	-0.0411687		414	-0.00066487
					415	0.00111481		415	-0.00132785		415	0.000318807		415	0.000321217		415	-0.0375464		415	-0.00023015
					416	0.000926785		416	-0.00162339		416	-0.000169791		416	0.000719761		416	-0.0335191		416	0.000315179
					417	-0.00134101		417	-0.00179926		417	-0.0017071		417	0.00037846		417	-0.0307267		417	0.000461118
					418	-3.69551e-05		418	-0.00131546		418	-0.00221309		418	-0.000462675		418	-0.0280592		418	0.000847669
					419	-0.00216585		419	0.000367981		419	-0.00241777		419	-0.000123635		419	-0.0253164		419	0.00203483
					420	-0.000122871		420	-0.000506263		420	-0.0018711		420	-0.000294409		420	-0.0232284		420	0.00180261
					421	0.000650407		421	-0.000467111		421	-0.00117309		421	-0.000644985		421	-0.0212448		421	0.000610999
					422	0.001554		422	0.00129604		422	0.00155628		422	-4.5353e-05		422	-0.0188658		422	-0.000209996
					423	0.00102791		423	-0.000102087		423	0.00168702		423	8.44994e-05		423	-0.017081		423	-4.03753e-05
					424	-1.78199e-05		424	-0.000680636		424	0.00169915		424	-0.000915416		424	-0.0163704		424	-0.00078014
					425	-0.00078319		425	-0.00167963		425	0.00262267		425	-0.00162509		425	-0.0154137		425	-0.00112929
					426	-0.00116818		426	-0.00189908		426	0.0011476		426	-0.0014645		426	-0.0134309		426	-0.000707823
					427	-0.00159276		427	-0.001419		427	-0.00015606		427	-0.00175365		427	-0.0119818		427	-0.000195742
					428	-0.000446923		428	-0.000219418		428	-0.000338293		428	-0.00175251		428	-0.0104662		428	-0.000903046
					429	0.000889354		429	0.000309663		429	-0.000699094		429	-0.00131108		429	-0.00898377		429	-0.000609736
					430	0.000226091		430	-0.000321779		430	-0.00148845		430	0.000440662		430	-0.00684445		430	-0.000175812
					431	-0.000216693		431	-0.000913758		431	-0.00131636		431	9.27267e-05		431	-0.00529798		431	-0.000961275
					432	-0.000358977		432	-0.00162629		432	-0.00107282		432	0.000495128		432	-0.00467412		432	-0.000116127
					433	-0.00137074		433	-0.000136892		433	-0.00110781		433	7.78807e-05		433	-0.00494264		433	0.000389632
					434	-0.00149197		434	-0.000119299		434	-0.00142133		434	-0.000269001		434	-0.00365327		434	0.000286
					435	-0.000472631		435	-0.00010296		435	-0.00187337		435	-0.000545501		435	-0.00427577		435	-0.000827024
					436	4.7287e-05		436	-0.0014723		436	-0.000683938		436	-0.000581604		436	-0.00475985		436	-0.00134944
					437	6.78078e-05		437	-0.000667856		437	-0.000963017		437	-0.000527296		437	-0.00418524		437	0.000364297
					438	0.00154895		438	0.000185932		438	0.000889395		438	-0.00030256		438	-0.00304163		438	0.000363623
					439	0.00108074		439	0.000649047		439	0.0015133		439	0.000142619		439	-0.00356872		439	0.000361476
					440	-0.000526796		440	0.00041147		440	0.0017987		440	-0.00133174		440	-0.0021762		440	-0.00164308
					441	-0.00154365		441	-0.000686816		441	0.00176561		441	-0.00167562		441	-0.00177374		441	-0.000522497
					442	-0.00168978		442	-0.000985829		442	0.00287401		442	-0.00116901		442	-0.000980996		442	0.000108683
					443	-0.00189518		443	-0.00107559		443	0.00144392		443	-0.000381892		443	-0.000497626		443	0.000340454
					444	-0.00180983		444	-0.00023611		444	-0.000224664		444	-0.000154242		444	0.00137673		444	0.000362813
					445	-0.000353689		445	9.25856e-05		445	-0.00102174		445	0.000863954		445	0.00137245		445	0.000525757
					446	0.000283256		446	0.00082048		446	-0.00101731		446	0.00188272		446	0.0014199		446	0.00105928
					447	0.000931029		447	0.000577554		447	-0.00227138		447	0.00175206		447	0.00084948		447	0.00094339
					448	0.000679656		448	0.000303788		448	-0.00187393		448	0.001112		448	0.000761594		448	0.000788072
					449	0.000459161		449	-0.000730836		449	8.50116e-05		449	0.000812569		449	-0.000733347		449	0.00117333
					450	-0.000560433		450	-0.000346337		450	0.00138546		450	0.000843775		450	-0.00026492		450	0.00162915
					451	-0.0004291		451	0.000437264		451	0.00100741		451	0.000125639		451	-0.00039269		451	0.00139554
					452	0.000113186		452	0.000689948		452	0.000910864		452	0.000568182		452	-0.000446212		452	0.000220539
					453	-0.000813552		453	0.000551695		453	-0.00062419		453	0.00106142		453	-0.00087503		453	0.000202856
					454	0.000310713		454	0.00144249		454	-0.00228775		454	0.00116539		454	-0.000778677		454	0.00018449
					455	0.00184601		455	0.0017723		455	-0.00226983		455	0.000790088		455	-0.000916675		455	0.000165507
					456	0.00153235		456	0.00131111		456	-0.00146042		456	0.00077555		456	-0.000868537		456	0.00250579
					457	2.9783e-05		457	0.00150891		457	0.000650471		457	0.000301795		457	-0.000873763		457	0.000325481
					458	-6.16807e-05		458	0.00190566		458	0.00225283		458	0.000748843		458	-0.00128184		458	0.0002457
					459	-0.00064201		459	0.000891362		459	0.00395666		459	0.00152672		459	-0.000992259		459	-0.000513553
					460	-0.00157118		460	7.59778e-05		460	0.00274194		460	1.96749e-05		460	-0.000944478		460	-0.000272282
					461	-0.000249158		461	0.000379491		461	0.00133868		461	1.92856e-05		461	-0.000467957		461	-9.0494e-05
					462	0.000894079		462	0.000781881		462	-0.000453134		462	1.87327e-05		462	0.000317855		462	0.000571807
					463	0.00132856		463	0.000423125		463	-0.000633513		463	0.00192691		463	0.00174352		463	0.00163461
					464	0.00124431		464	0.0010532		464	-0.00244246		464	0.00127925		464	0.00115962		464	0.00229792
					465	0.000851366		465	0.00117209		465	-0.00165		465	-0.000227454		465	0.000386728		465	0.00145173
					466	-0.000700251		466	0.000979765		466	-0.00106612		466	-0.00090317		466	0.00103545		466	0.000636017
					467	-0.000950511		467	0.000516208		467	-0.000330838		467	-0.00110787		467	0.00169638		467	-0.000459209
					468	-0.000979383		468	0.00193139		468	-0.000164171		468	-0.000941547		468	0.000640152		468	-0.00252396
					469	-0.000746839		469	0.0015853		469	0.000983874		469	1.11762e-05		469	0.00116738		469	-0.000125755
					470	-0.000252849		470	0.000857909		470	0.000733286		470	9.7015e-06		470	0.00191871		470	-0.000145336
					471	0.000402617		471	-0.000220809		471	-0.000195948		471	-0.00107611		471	0.000464792		471	-0.00181542
					472	-2.04115e-05		472	-0.000400874		472	-0.00068384		472	-0.0010654		472	-0.00055372		472	-0.000198333
					473	0.000978097		473	-0.00154231		473	-0.000940403		473	4.93529e-06		473	0.000173849		473	-0.000120804
					474	0.00141817		474	2.27107e-06		474	-0.00166565		474	-0.00200046		474	0.000178179		474	0.000767158
					475	0.00118984		475	-0.00163939		475	-0.0018796		475	-0.00166619		475	-0.000170036		475	0.000445548
					476	0.000433148		476	-0.00101508		476	-0.00012226		476	-9.48e-08		476	0.000319906		476	0.000554356
					477	0.000468111		477	-0.00128223		477	0.000726351		477	-1.77329e-06		477	-0.000231281		477	-0.000376424
					478	-0.000385235		478	-0.00164088		478	0.000556218		478	-0.00141583		478	-0.000582873		478	-0.0001668
					479	1.31444e-05		479	-0.000811035		479	0.000607324		479	-0.000986444		479	-4.13287e-06		479	-0.00152678
					480	0.00133328		480	-0.000462732		480	0.00139965		480	-0.00155571		480	0.00142568		480	-0.00199638
					481	0.0020652		481	-0.000285992		481	7.31898e-05		481	-0.000623592		481	0.00168734		481	-0.00152559
					482	0.00177895		482	-0.00044084		482	-0.00135209		482	-0.000610074		482	0.00201159		482	-0.00126444
					483	0.00191455		483	-0.000317301		483	-0.000716191		483	-0.000905122		483	0.00216922		483	-0.00175292
					484	0.000502034		484	-0.0007854		484	0.00104086		484	0.000361291		484	0.00156102		484	-0.000471053
					485	-0.000738559		485	-0.00111516		485	0.000539037		485	1.91947e-05		485	-0.000612208		485	-0.000208842
					486	-0.0012772		486	-0.000796613		486	0.00135833		486	-0.000221381		486	-0.00179966		486	-0.0010663
					487	-0.000323848		487	1.02218e-05		487	0.00150872		487	-0.000120406		487	-0.00226051		487	-0.00120342
					488	-0.000618475		488	0.000525316		488	0.00117018		488	0.000272148		488	-0.00241392		488	-0.000630237
					489	-0.000501046		489	0.000638645		489	0.000282689		489	0.000696313		489	-0.00219907		489	-0.000536744
					490	-0.00107152		490	-0.000159819		490	0.000516231		490	0.00175212		490	-0.00130508		490	-0.000502955
					491	-0.000159876		491	-0.000680102		491	0.000130782		491	0.0020196		491	-0.000351098		491	-1.88794e-05
					492	-0.000916066		492	-0.000722229		492	0.00100632		492	0.00160878		492	0.000653752		492	0.000425472
					493	-0.000880059		493	-0.000396229		493	0.000382817		493	0.00170969		493	0.000490355		493	0.00041009
					494	-0.000461819		494	0.000587873		494	4.02547e-05		494	0.000822373		494	-0.000170391		494	0.000364964
					495	0.000678691		495	0.00118005		495	0.000288608		495	0.000646851		495	-0.00133758		495	0.000660082
					496	0.000191505		496	0.00184027		496	0.000527852		496	-4.68398e-05		496	-0.00120029		496	0.000155435
					497	-0.00124334		497	0.00188852		497	-0.000242039		497	0.000631332		497	-0.0019976		497	0.000401012
					498	-0.0010658		498	0.00128475		498	-0.000631089		498	0.000911399		498	-0.00162856		498	0.000586801
					499	-0.00126585		499	0.000628954		499	-0.00111933		499	0.0016634		499	-0.00116223		499	0.000722792
					500	1.3511e-06		500	0.000721092		500	-0.00221677		500	0.00134735		500	-0.000907642		500	0.000448973
					501	-0.00168856		501	0.000151139		501	-0.00181346		501	-5.47194e-06		501	-0.000193828		501	0.000935332
					502	0.000818864		502	-0.00144093		502	-0.000759418		502	-2.58421e-06		502	-9.80378e-06		502	0.00131186
					503	0.000938851		503	-0.00176515		503	0.000135332		503	0.00135134		503	-0.000574577		503	0.00126854
					504	0.000701443		504	-0.00205155		504	0.000710758		504	-0.000296515		504	-0.000267144		504	0.000675368
					505	0.00162668		505	-0.00146015		505	0.00128683		505	-0.00117223		505	-7.64883e-05		505	0.000242326
					506	0.00115459		506	-0.00101099		506	0.000423524		506	1.28286e-05		506	-0.000841586		506	6.94027e-05
					507	-0.000304772		507	0.000595918		507	-0.000349196		507	1.77246e-05		507	-0.000241401		507	-0.000543413
					508	-0.000181376		508	0.00072053		508	-0.000181359		508	-0.00199624		508	0.000925115		508	-0.000296135
					509	9.4819e-05		509	0.00156282		509	-0.000532995		509	-0.000653078		509	0.00182902		509	-0.000358774
					510	0.000693853		510	0.00080276		510	0.000375865		510	0.000232401		510	0.00272138		510	-0.000371345
					511	-0.000194552		511	0.0010227		511	0.00170318		511	0.00241225		511	0.00174633		511	0.00039498
					512	0.00157969		512	0.0010359		512	0.00220644		512	0.00272415		512	0.000424652		512	0.000645379
					513	0.00074437		513	0.000917977		513	0.000829827		513	0.00140748		513	-0.0237188		513	-0.000843834
					514	-0.00156054		514	-0.00100101		514	0.00066337		514	-0.00220768		514	-0.0825543		514	-0.00364269
					515	-0.00627507		515	-0.00383102		515	0.000147105		515	-0.00624122		515	-0.165842		515	-0.00722122
					516	-0.0114892		516	-0.009252		516	0.00156107		516	-0.0107131		516	-0.265463		516	-0.0125994
					517	-0.0164331		517	-0.0155439		517	0.00701529		517	-0.0142531		517	-0.357217		517	-0.0153874
					518	-0.0177766		518	-0.0193667		518	0.0142798		518	-0.0137813		518	-0.409185		518	-0.0154751
					519	-0.0173298		519	-0.0214103		519	0.0199546		519	-0.0119174		519	-0.416956		519	-0.0129726
					520	-0.0143028		520	-0.0205346		520	0.0233098		520	-0.00944157		520	-0.392622		520	-0.00940992
					521	-0.00986548		521	-0.0164297		521	0.0236954		521	-0.00683356		521	-0.346992		521	-0.00451707
					522	-0.00560797		522	-0.0104655		522	0.0187014		522	-0.00504334		522	-0.304127		522	-0.00126407
					523	-0.00240026		523	-0.00653195		523	0.0117778		523	-0.00622082		523	-0.275738		523	0.000549037
					524	0.000277643		524	-0.00339898		524	0.00421475		524	-0.00710594		524	-0.254493		524	0.000402236
					525	0.0014257		525	-0.00194655		525	-0.00260784		525	-0.00720863		525	-0.236945		525	0.000415503
					526	0.00189391		526	-0.00128463		526	-0.00898991		526	-0.0071788		526	-0.221853		526	-0.00106119
					527	0.00211224		527	-0.00207318		527	-0.0121214		527	-0.00645641		527	-0.207707		527	-0.00204785
					528	0.00182068		528	-0.00261216		528	-0.0116824		528	-0.00504138		528	-0.192897		528	-0.00117451
					529	0.00142921		529	-0.00288151		529	-0.0081327		529	-0.00268366		529	-0.178575		529	0.000408803
					530	0.00163781		530	-0.0027112		530	-0.00556241		530	-0.00164317		530	-0.164479		530	0.00206208
					531	0.00180647		531	-0.0024212		531	-0.00211148		531	-0.00104988		531	-0.149901		531	8.15139e-05
					532	0.00119517		532	-0.00174145		532	-0.000339873		532	-0.000833711		532	-0.137241		532	0.000123417
					533	0.000293889		533	-0.00159192		533	-0.000957579		533	-0.00187462		533	-0.125998		533	0.000172784
					534	-0.000617381		534	-0.00132258		534	-0.00283457		534	-0.00343257		534	-0.115563		534	0.00177442
					535	-0.00114865		535	-0.000703379		535	-0.00251084		535	-0.00394749		535	-0.106557		535	0.000567229
					536	0.00041384		536	-0.000774286		536	-0.00417635		536	-0.00345936		536	-0.0990991		536	0.000749887
					537	0.000382554		537	-0.000135261		537	-0.0048511		537	-0.00433812		537	-0.0927799		537	-0.000127615
					538	0.000347518		538	-0.00026627		538	-0.00506506		538	-0.00426373		538	-0.0888095		538	-0.000475294
					539	0.000308413		539	-0.000357277		539	-0.00541822		539	-0.00349616		539	-0.0857782		539	-0.000743163
					540	0.000265401		540	-0.000138245		540	-0.00641056		540	-0.00319538		540	-0.0835661		540	-0.00154124
					541	0.000218965		541	-0.000529141		541	-0.00563207		541	-0.00378135		541	-0.0828734		541	0.000693968
					542	0.000169811		542	-0.00166993		542	-0.00533273		542	-0.00349403		542	-0.0817002		542	0.000757756
					543	-0.00110062		543	-0.00133058		543	-0.00494253		543	-0.00253341		543	-0.0791967		543	-0.00130681
					544	-0.000472506		544	-0.00133106		544	-0.00367145		544	-0.00231945		544	-0.0770231		544	-0.000785823
					545	-0.000454518		545	-0.00182133		545	-0.00263949		545	-0.00224214		545	-0.0747394		545	0.0005149
					546	3.33922e-06		546	-0.000721372		546	-0.00237663		546	-0.00232145		546	-0.0730558		546	0.00231535
					547	-5.89428e-05		547	0.000118858		547	-0.00153286		547	-0.00224736		547	-0.0711424		547	0.00168552
					548	8.62854e-06		548	-0.00165023		548	-0.000478167		548	-0.00259986		548	-0.0694093		548	0.0010754
					549	-0.000113954		549	0.000640239		549	-0.00057255		549	-0.00213894		549	-0.0681467		549	0.00136498
					550	0.0010933		550	-0.000168551		550	-0.000135997		550	-0.00163458		550	-0.0677346		550	0.00129425
					551	0.000130393		551	-0.000926955		551	-0.000358499		551	-0.00136678		551	-0.0648831		551	-0.000146785
					552	-0.00029269		552	-0.000394946		552	5.99495e-05		552	-0.00109553		552	-0.0612122		552	1.85897e-06
					553	-0.00059595		553	-0.0018625		553	0.000339356		553	-0.000930819		553	-0.0587322		553	0.00019018
					554	-0.000509392		554	-0.00075958		554	9.72408e-06		554	-0.00189266		554	-0.0551629		554	0.000268172
					555	-0.00077302		555	0.00025383		555	-0.00086894		555	-0.00233104		555	-0.0520845		555	0.000515832
					556	0.000633162		556	-0.000202241		556	-0.000356633		556	-0.00201597		556	-0.0493871		556	0.00174316
					557	0.000699151		557	-0.00110777		557	-0.000703351		557	-0.00203746		557	-0.0472606		557	0.00225014
					558	0.000924944		558	-0.00153272		558	-0.00158909		558	-0.00193551		558	-0.0447951		558	0.00194679
					559	0.00108054		559	-0.00163709		559	-0.00175386		559	-0.00149014		559	-0.0433006		559	0.00192309
					560	0.000225939		560	-0.00129084		560	-0.00106764		560	-0.000941348		560	-0.0401272		560	0.00187905
					561	0.000371137		561	-0.00144395		561	-0.000850444		561	-0.00100916		561	-0.0375848		561	0.000934667
					562	0.00161614		562	-0.0010464		562	-0.000902269		562	-0.0011536		562	-0.0353234		562	0.00128994
					563	0.00147093		563	-0.000978164		563	-0.000413117		563	-0.00117468		563	-0.033193		563	0.00247487
					564	0.000565531		564	-0.00203923		564	0.000627011		564	-0.000182423		564	-0.0301337		564	0.00221946
					565	0.00140993		565	-0.00246957		565	8.81109e-05		565	-0.000616856		565	-0.0289054		565	0.00107372
					566	0.000654136		566	-0.00232917		566	0.00022018		566	-0.000638007		566	-0.027728		566	0.00142763
					567	-0.000701855		567	6.14036e-06		567	0.000703213		567	-0.000345905		567	-0.0256315		567	0.00163122
					568	-0.00108804		568	-0.00162606		568	0.000177206		568	-0.000260583		568	-0.0228459		568	0.000284479
					569	-0.000534407		569	-0.000153311		569	-0.000487848		569	-0.000962076		569	-0.0199311		569	0.000457416
					570	-0.00132096		570	-0.000209751		570	-0.000541954		570	-0.00115042		570	-0.0168271		570	0.00135004
					571	-0.0013777		571	-0.000265357		571	-0.00124512		571	-0.00042566		571	-0.0142638		571	0.00192234
					572	-0.00118461		572	0.000589886		572	-0.00202736		572	-0.000367833		572	-0.011831		572	0.00245435
					573	-0.000141688		573	-0.000554007		573	-0.00280867		573	-0.000866984		573	-0.0101788		573	0.00237606
					574	-0.000418932		574	-0.00087702		574	-0.00273907		574	-0.00140316		574	-0.0107169		574	0.00142748
					575	0.000193665		575	-0.000279139		575	-0.00184857		575	-0.000886415		575	-0.0109854		575	0.00152861
					576	0.00112611		576	0.00108965		576	-0.00108718		576	-0.000776796		576	-0.0095241		576	0.000739482
					577	0.00121842		577	0.00081936		577	-0.000174909		577	-0.00118436		577	-0.00890286		577	-0.00052991
					578	0.000760582		578	0.000950004		578	0.000478229		578	-0.00147916		578	-0.00810158		578	0.000220447
					579	0.00102262		579	0.000371593		579	0.00027222		579	-0.000311258		579	-0.00634011		579	0.00118057
					580	0.000314545		580	-0.000755861		580	-0.000102951		580	0.000539284		580	-0.00511832		580	0.00114046
					581	-0.00114364		581	-0.00178235		581	-0.000667297		581	0.000382403		581	-0.00567606		581	0.000150134
					582	-0.00156193		582	-0.00172785		582	-0.000520836		582	0.000638033		582	-0.00609316		582	-0.000360391
					583	-0.0014203		583	-0.000682374		583	0.000926418		583	0.0017961		583	-0.00651946		583	-0.0020811
					584	-0.000768747		584	0.000494104		584	0.00132445		584	0.000846546		584	-0.00700478		584	0.000199009
					585	-0.000177262		585	0.00204159		585	0.00115323		585	-0.000690716		585	-0.00624894		585	0.000176022
					586	0.000674171		586	0.00188008		586	0.00129275		586	-0.00147576		586	-0.00521175		586	0.000154118
					587	0.000655563		587	0.0023696		587	0.000172993		587	-0.000918655		587	-0.00338301		587	-0.00156553
					588	0.000446929		588	0.00172014		588	-0.000956069		588	-0.000999491		588	-0.00258252		588	-0.000176956
					589	0.00062828		589	0.00176172		589	-0.000584453		589	-0.00077835		589	-0.000590051		589	0.00108153
					590	0.000289633		590	0.00180433		590	-0.000212182		590	2.46839e-05		590	-7.53942e-05		590	0.00113994
					591	2.10009e-05		591	0.00280799		591	0.000550723		591	0.000499522		591	-0.000758314		591	0.0020083
					592	-0.0003576		592	0.0017027		592	0.00139424		592	-0.000283926		592	-0.00152857		592	0.00156662
					593	-0.000126155		593	0.00115846		593	0.000948336		593	0.000244247		593	-0.00151592		593	0.00058493
					594	-0.000954646		594	0.000275274		594	0.000112996		594	0.00103395		594	-0.00159011		594	-0.00109676
					595	-0.00105306		595	0.000203145		595	-0.000351808		595	0.00114507		595	-0.000880874		595	-0.00190842
					596	-0.000481372		596	0.00156208		596	-0.0010361		596	0.00151752		596	0.00156206		596	-0.00159003
					597	0.000450429		597	0.000454806		597	-0.00162992		597	0.0022412		597	0.00201896		597	-0.00159156
					598	-0.000207637		598	0.000429251		598	-0.000963275		598	0.001046		598	0.00306012		598	-0.000563006
					599	4.45029e-06		599	0.000402419		599	-0.000876207		599	0.000471808		599	0.00298583		599	0.00031567
					600	0.000376709		600	0.000374433		600	-0.000818744		600	-0.00059148		600	0.0035264		600	0.000324491
					601	0.00107916		601	0.000345413		601	-0.000290913		601	-7.39776e-05		601	0.00204213		601	-0.00105652
					602	0.000881823		602	0.00192794		602	0.00113725		602	0.0005642		602	0.00145334		602	-0.000747335
					603	0.00172472		603	0.000784292		603	0.00120572		603	0.00153294		603	0.000520361		603	-0.00102793
					604	0.00201787		604	0.000261697		604	0.000124465		604	0.000225262		604	-0.00072648		604	-9.82742e-05
					605	0.000204825		605	-0.000919849		605	-0.000196554		605	0.00021528		605	-0.00150684		605	-0.000288343
					606	0.00095503		606	-0.000590348		606	-0.000917369		606	0.000204269		606	-0.000370367		606	2.18933e-05
					607	0.00139908		607	0.000190195		607	-0.00138801		607	0.00206103		607	-0.000116706		607	0.000932464
					608	0.000523479		608	0.000651774		608	-0.00148852		608	0.00138072		608	-0.000565491		608	0.000303397
					609	0.000518248		609	0.000634384		609	0.00063107		609	7.0204e-05		609	-5.63491e-05		609	-0.000505275
					610	-0.000516587		610	3.80182e-05		610	0.00179072		610	-0.000370637		610	-0.000528899		610	0.000236478
					611	-0.000641002		611	-0.00040733		611	0.0013404		611	0.000368057		611	-0.00117275		611	-0.000401313
					612	-0.000784971		612	-0.00138167		612	-0.000679936		612	8.61453e-05		612	-0.00178751		612	-0.00149861
					613	-0.000788466		613	-0.002065		613	-0.00137032		613	-0.000156512		613	-0.00138277		613	-0.000685394
					614	-0.000711463		614	-0.00253735		614	-0.00247081		614	0.00044994		614	-0.00148812		614	0.000228381
					615	-6.39322e-05		615	-0.00262871		615	-0.00223142		615	0.000155356		615	-0.00133313		615	0.000362746
					616	0.000194153		616	-0.000134748		616	-0.000352211		616	-0.00119041		616	-0.00167738		616	0.000667735
					617	-0.00127718		617	-0.00261852		617	0.00158678		617	-0.000637517		617	-0.00108044		617	0.000183384
					618	-0.0011179		618	-0.00275699		618	0.00182552		618	-0.00036611		618	-0.00104185		618	0.000119729
					619	-0.00167798		619	-0.00296452		619	0.00211395		619	-0.00113635		619	-0.000351169		619	-0.000123194
					620	-0.00195738		620	-0.00197112		620	0.00136203		620	-0.00145839		620	0.00038207		620	0.000444653
					621	-6.05673e-05		621	-0.00163681		621	0.000439723		621	-0.000802394		621	0.000338332		621	0.00101331
					622	-0.00109406		622	-0.00233159		622	0.000536976		622	-4.96184e-05		622	0.0011581		622	0.00181281
					623	-0.000521273		623	-0.00190549		623	0.00136374		623	-0.00198695		623	0.00199184		623	0.0013232
					624	-0.000977685		624	-0.00148851		624	0.00175998		624	-8.25359e-05		624	0.00201007		624	0.000624509
					625	-0.000973269		625	-0.00131068		625	0.00140563		625	-0.00197135		625	0.00241327		625	-0.000123212
					626	-0.000327991		626	-0.000661999		626	0.00205066		626	-0.000113462		626	0.00306195		626	-0.000109925
					627	0.000438182		627	0.000187504		627	0.000915004		627	-0.000996963		627	0.00244664		627	0.00011441
					628	2.52853e-05		628	0.000117815		628	-0.000481381		628	-2.94152e-05		628	0.00150785		628	0.000919838
					629	0.00117335		629	-0.000121083		629	-0.00129854		629	0.000934796		629	0.00151612		629	-0.0001436
					630	0.00168242		630	-0.000419207		630	-0.000526543		630	0.00157549		630	0.000851984		630	0.00015414
					631	0.000642521		631	-0.000966578		631	-0.000165425		631	-0.000177297		631	0.000235993		631	0.000303103
					632	0.000523693		632	-0.000913214		632	0.000654753		632	0.00110558		632	-0.0001413		632	2.33346e-05
					633	0.000125974		633	-0.000669135		633	0.00220394		633	-5.54014e-05		633	-0.000139329		633	-0.000125121
					634	0.0003094		634	-0.000584362		634	0.00196208		634	-0.00117065		634	-0.00122752		634	0.00150778
					635	0.000784009		635	-0.00105891		635	0.00161911		635	-0.000840374		635	-0.0011453		635	0.0015421
					636	0.00111984		636	-0.000642818		636	-0.000395016		636	-0.000334757		636	-0.000442082		636	0.00035786
					637	0.000486931		637	0.000203908		637	-0.000910359		637	0.000565998		637	0.000142736		637	0.000155128
					638	0.000915321		638	0.00061124		638	-0.00157698		638	0.000671687		638	0.000139754		638	-0.000226053
					639	0.00066505		639	0.00182916		639	-0.000774929		639	0.00127211		639	0.000499583		639	-0.000305633
					640	8.61598e-05		640	0.00225763		640	-0.000594274		640	0.000647053		640	-0.000547158		640	-0.000603563
					641	-0.00033131		641	0.00188663		641	0.000244927		641	-0.000333687		641	-0.00141984		641	0.00031021
					642	-0.00105732		642	6.14824e-06		642	-0.000147386		642	-0.000350322		642	-0.00234783		642	0.000645735
					643	-0.000741821		643	-0.000463855		643	-0.000581276		643	-0.000913066		643	-0.00207049		643	-6.69353e-05
					644	-0.00121478		644	-0.000973402		644	-0.000806804		644	-9.21366e-05		644	-0.00158716		644	-0.000267748
					645	-0.000366145		645	0.000537479		645	-0.00190403		645	1.22483e-05		645	-0.000967188		645	-0.000376649
					646	0.000394121		646	0.00124876		646	-0.00205303		646	0.000889868		646	-0.000599904		646	-0.000563586
					647	0.000846064		647	0.00159042		647	-0.00212386		647	6.04978e-05		647	-0.000504633		647	-0.0011985
					648	0.000669729		648	0.00154242		648	-0.00112658		648	0.00151391		648	-0.000520695		648	-0.000901345
					649	0.00143516		649	0.00184473		649	-0.00118126		649	0.000769885		649	-0.000347397		649	-0.00116206
					650	0.000722405		650	0.000497327		650	-0.000307978		650	0.000838182		650	-0.000764043		650	-0.00113058
					651	-0.000518492		651	-0.000199821		651	3.21033e-06		651	0.000238573		651	-0.000549925		651	-0.00146686
					652	-0.000477483		652	-0.000186747		652	0.000612233		652	-1.91799e-05		652	0.000245671		652	-0.000860843
					653	-0.000444522		653	-0.000563482		653	-0.000210979		653	-0.00110531		653	0.000303466		653	-0.000442462
					654	-0.00144956		654	-0.000860059		654	0.000163505		654	-0.00197007		654	-0.000215808		654	-0.000151662
					655	-0.00156255		655	0.000303489		655	-0.000324388		655	-0.00176369		655	-9.14141e-05		655	-0.000358383
					656	0.000146557		656	0.000697129		656	-3.47274e-05		656	-0.00126641		656	9.73938e-05		656	0.000167435
					657	0.000587811		657	0.000200826		657	0.000422414		657	9.14994e-05		657	-0.00010863		657	0.000285854
					658	0.000621262		658	5.45457e-05		658	0.000526962		658	0.000569807		658	0.000721275		658	0.000976934
					659	0.000226959		659	0.000218253		659	0.00113884		659	0.00158826		659	0.00123788		659	0.000700738
					660	0.000364954		660	-0.000958089		660	0.00228799		660	0.000956588		660	0.00185196		660	0.000997328
					661	-0.000198847		661	-0.0014477		661	0.00113704		661	0.000580272		661	0.000805535		661	-0.000301882
					662	-0.000590827		662	-0.000282987		662	-0.000387711		662	-0.000143069		662	-0.00030368		662	-0.000350605
					663	-0.000542666		663	0.000430821		663	-0.00176256		663	-0.00286668		663	-0.0254346		663	-0.00190784
					664	-0.00206442		664	-0.000896265		664	-0.00387751		664	-0.00560057		664	-0.0815377		664	-0.00519357
					665	-0.00598616		665	-0.00321424		665	-0.00361254		665	-0.00877473		665	-0.160383		665	-0.0102178
					666	-0.0108279		666	-0.00728308		666	-0.00128765		666	-0.0115992		666	-0.253771		666	-0.0153806
					667	-0.0151398		667	-0.0115928		667	0.00400718		667	-0.0133738		667	-0.337373		667	-0.0187118
					668	-0.0189918		668	-0.0154233		668	0.010782		668	-0.0115288		668	-0.380197		668	-0.0181516
					669	-0.0187439		669	-0.0169147		669	0.0168167		669	-0.00996401		669	-0.382365		669	-0.0137499
					670	-0.0162864		670	-0.0160669		670	0.0199014		670	-0.00787947		670	-0.355347		670	-0.00897676
					671	-0.0116991		671	-0.01255		671	0.0204561		671	-0.00557519		671	-0.309053		671	-0.00346211
					672	-0.00630216		672	-0.00839379		672	0.0175207		672	-0.00436115		672	-0.267284		672	0.000224012
					673	-0.0011356		673	-0.00379841		673	0.0110254		673	-0.00387735		673	-0.24064		673	0.000731597
					674	0.00210052		674	-0.000263812		674	0.00363002		674	-0.0036338		674	-0.2208		674	-0.00067936
					675	0.00402617		675	0.00133002		675	-0.00382532		675	-0.00347048		675	-0.204576		675	-0.00184886
					676	0.0044113		676	0.00152311		676	-0.00968065		676	-0.00369739		676	-0.190997		676	-0.00216692
					677	0.00416588		677	0.00167545		677	-0.012706		677	-0.00317453		677	-0.177534		677	-0.00296354
					678	0.00253985		678	0.000307056		678	-0.0127112		678	-0.00259189		678	-0.163516		678	-0.00312873
					679	0.00148319		679	-0.00161205		679	-0.0103865		679	-0.00184947		679	-0.149575		679	-0.00140249
					680	0.00156585		680	-0.00168186		680	-0.00581168		680	-0.00107726		680	-0.135931		680	0.000165163
					681	0.00189781		681	-0.00189236		681	-0.00274683		681	-0.000615262		681	-0.122472		681	0.00104422
					682	0.00139902		682	-0.00239355		682	-0.00152192		682	-0.000813466		682	-0.109771		682	-0.00194699
					683	0.00112946		683	-0.0021554		683	-0.000196958		683	-0.00101187		683	-0.0990268		683	-0.00194571
					684	4.90876e-05		684	-0.000727901		684	-0.000271928		684	-0.00206046		684	-0.0893996		684	-0.00193595
					685	-0.000172122		685	-0.000591047		685	-0.00196683		685	-0.00259925		685	-0.0819199		685	4.43036e-05
					686	-0.0010442		686	0.000215179		686	-0.00324165		686	-0.00208821		686	-0.0755476		686	-0.00108977
					687	-0.000657169		687	0.00120079		687	-0.00359639		687	-0.00173736		687	-0.0709531		687	-0.0028525
					688	-3.10604e-05		688	-0.000702703		688	-0.00475105		688	-0.00103667		688	-0.0673064		688	-0.0036839
					689	0.000804103		689	-0.000682853		689	-0.00505562		689	-0.000246151		689	-0.0652378		689	-0.00389399
					690	0.000158299		690	-0.000664121		690	-0.0049801		690	-7.57897e-05		690	-0.0633573		690	-0.00382278
					691	-8.49626e-06		691	-0.00064614		691	-0.00411449		691	0.000234418		691	-0.0616851		691	-0.00171338
					692	-0.0012663		692	0.000460054		692	-0.00349877		692	0.000974478		692	-0.0605513		692	-0.00166715
					693	0.000386482		693	-0.000777758		693	-0.00216296		693	0.000134398		693	-0.0599061		693	-0.00161907
					694	0.000517184		694	-0.00109609		694	-0.00173704		694	-0.000500842		694	-0.0595096		694	-0.00156967
					695	-0.000905974		695	-0.000944938		695	-0.00128101		695	-0.000460657		695	-0.0584218		695	-0.00360774
					696	0.000121997		696	-0.00094428		696	-0.000894877		696	-0.000422424		696	-0.057303		696	-0.00332905
					697	0.00148887		697	-0.000424105		697	-0.000318634		697	0.0012428		697	-0.0563731		697	-0.00262917
					698	0.00182464		698	0.000635601		698	0.000277721		698	0.000502114		698	-0.0550223		698	-0.000988112
					699	0.00110451		699	0.000334851		699	0.000904187		699	-0.000378671		699	-0.0524807		699	-0.000205904
					700	0.00119667		700	0.000913658		700	0.000860767		700	-0.000699549		700	-0.0512883		700	-0.000112562
					701	0.00303521		701	0.000692038		701	8.74605e-05		701	-0.00101051		701	-0.0512452		701	0.000431896
					702	0.00201646		702	0.000550003		702	-0.000215732		702	-0.00128155		702	-0.0506714		702	-0.00117089
					703	0.00136656		703	-0.000102432		703	-0.000818811		703	-0.000952667		703	-0.0490071		703	0.000694077
					704	-0.000184499		704	-0.000255253		704	-0.00100178		704	-0.00134384		704	-0.0475322		704	0.000281758
					705	4.32916e-05		705	-0.000548447		705	-0.000754627		705	-0.00144507		705	-0.0456769		705	0.000260473
					706	0.000649925		706	-7.19975e-05		706	0.000352634		706	-0.00104635		706	-0.0428311		706	0.000620197
					707	0.0013854		707	-3.5892e-05		707	0.000700006		707	-0.000187664		707	-0.0406948		707	0.000930911
					708	0.00173972		708	1.98843e-05		708	0.00105749		708	-0.000279011		708	-0.0392282		708	0.000902589
					709	0.00256288		709	0.000705346		709	0.000555079		709	-0.000330379		709	-0.0377212		709	0.000575209
					710	0.0028849		710	-0.000259493		710	0.000582776		710	-0.000321761		710	-0.0358937		710	0.000678747
					711	0.00182577		711	-0.000344618		711	0.00116058		711	-0.000183148		711	-0.0333359		711	0.000633179
					712	0.00192551		712	-0.000780013		712	0.000918479		712	-0.00149453		712	-0.0302876		712	-0.000631521
					713	0.00222411		713	-0.00125566		713	5.64808e-05		713	-0.000745903		713	-0.026909		713	-0.00144538
					714	0.00123159		714	-0.00186156		714	0.000984578		714	-0.000507253		714	-0.0237898		714	-0.00167842
					715	0.00091796		715	-0.00138768		715	0.00109277		715	-0.000378571		715	-0.0206803		715	-0.00208067
					716	0.000963233		716	-3.89528e-05		716	-1.89538e-05		716	-0.00052985		716	-0.0194502		716	-0.00200215
					717	0.000917422		717	-2.10927e-05		717	-0.00032059		717	0.00061892		717	-0.0173095		717	-0.0019329
					718	0.00103054		718	-0.00172725		718	-4.21463e-05		718	-0.000322251		718	-0.0162483		718	-0.00179294
					719	0.0019726		719	-0.00162413		719	-0.000423626		719	-0.000243354		719	-0.0156663		719	-0.00149231
					720	0.00178363		720	-0.00150116		720	-0.000335034		720	8.56221e-05		720	-0.0138437		720	-0.00129102
					721	0.00100364		721	-0.00116833		721	0.000273625		721	-0.000795314		721	-0.0124103		721	-0.00208911
					722	0.000442655		722	-0.000535616		722	0.000382344		722	-0.00138615		722	-0.012616		722	-0.00287661
					723	0.000210692		723	5.69911e-05		723	0.00074112		723	-0.000976882		723	-0.0114207		723	-0.000395991
					724	-0.000402225		724	0.000739508		724	0.000809945		724	-0.000887494		724	-0.00965433		724	-0.00251997
					725	-0.00046607		725	0.00152195		725	0.000208813		725	-0.00140798		725	-0.00887684		725	-0.00198588
					726	0.000629182		726	0.00103433		726	-0.000512281		726	-0.00124832		726	-0.00800809		726	-0.000991329
					727	0.000923558		727	0.000316671		727	-0.000113344		727	-0.000888513		727	-0.00835796		727	-0.000406345
					728	0.00130709		728	0.000308982		728	-0.000714384		728	-0.000288545		728	-0.00773633		728	0.000139038
					729	0.0019498		729	0.000241282		729	-0.00106541		729	-0.000128406		729	-0.00731307		729	-0.000945212
					730	0.000591401		730	-0.000676415		730	-0.000366423		730	0.00139192		730	-0.00690806		730	-0.00154913
					731	0.000540619		731	-7.40922e-05		731	-0.000117438		731	0.00177243		731	-0.00655114		731	-0.00116275
					732	0.000491269		732	0.000168267		732	-0.000938459		732	0.00152315		732	-0.00558217		732	-0.000586112
					733	0.0021531		733	0.000620678		733	-0.000769496		733	0.00182409		733	-0.00599099		733	-0.000269246
					734	0.00100221		734	0.000703156		734	-0.00152056		734	0.00150526		734	-0.00555744		734	0.000307811
					735	3.07117e-05		735	0.00088572		735	-0.00309165		735	-0.000143337		735	-0.00586135		735	0.00100502
					736	-0.000461358		736	0.000858383		736	-0.00311279		736	-0.000471679		736	-0.00494254		736	0.000412348
					737	-0.00018396		737	0.000731164		737	-0.00253398		737	0.000110242		737	-0.00345083		737	0.000699753
					738	-0.00070705		738	4.07758e-06		738	-0.00232523		738	-0.000507562		738	-0.00318602		738	0.000927198
					739	-0.000900587		739	0.000537141		739	-0.00155655		739	0.000234923		739	-0.00332793		739	0.00130464
					740	-0.00157453		740	0.00104037		740	-0.000567957		740	0.000687707		740	-0.00238633		740	0.000572054
					741	0.000125761		741	0.00114378		741	-0.000199454		741	0.0016108		741	-0.00265102		741	-2.06147e-05
					742	9.48043e-05		742	0.0014174		742	-0.000451055		742	0.000894226		742	-0.00284179		742	1.65992e-05
					743	-0.00135828		743	0.00199123		743	6.72285e-05		743	0.000847985		743	-0.0029684		743	0.000633655
					744	-0.00142335		744	0.00129529		744	-0.000214614		744	0.000452095		744	-0.00253061		744	0.00018051
					745	-0.00112857		745	0.000499602		745	-0.000336595		745	0.000456568		745	-0.00354821		745	0.000517125
					746	-0.00125391		746	0.000274182		746	-0.000508725		746	0.00100142		746	-0.00324092		746	0.000493455
					747	-0.000769287		747	0.000259046		747	-0.000881019		747	0.00144666		747	-0.0027285		747	0.000219459
					748	-0.000354663		748	0.000104212		748	-0.00198349		748	0.0011123		748	-0.000720688		748	-0.00108491
					749	0.00107002		749	9.69562e-06		749	-0.00183614		749	0.000558359		749	0.000782785		749	-0.000979688
					750	0.00094483		750	2.55155e-05		750	-0.000749		750	0.000274848		750	0.00246219		750	-0.000114926
					751	0.000509817		751	-0.000218312		751	-0.000332072		751	-0.00073822		751	0.00258783		751	0.00142933
					752	-0.000674956		752	-0.00139177		752	0.000734628		752	-0.00044083		752	0.00293996		752	0.00183304
					753	-0.000859424		753	-0.00144484		753	0.00140109		753	-0.000542968		753	0.00288891		753	0.00193616
					754	-0.00127353		754	-0.0010075		754	0.00172729		754	-0.000284621		754	0.00195496		754	0.00184863
					755	-0.000717195		755	-7.97399e-05		755	0.00203322		755	-7.57741e-05		755	0.00145844		755	0.00101042
					756	-0.000280365		756	0.000938461		756	0.00172886		756	-0.000746413		756	0.00075965		756	0.000211475
					757	0.000907032		757	0.00162712		757	0.00141421		757	-0.000836524		757	5.89254e-05		757	1.74563e-06
					758	0.000695065		758	0.000586256		758	0.00101923		758	-0.000356092		758	-0.000873405		758	0.000341185
					759	7.38034e-05		759	-0.00118411		759	0.00131393		759	-4.51012e-05		759	-0.001037		759	0.000369744
					760	-0.000136679		760	-0.00180397		760	0.000378276		760	-6.35383e-05		760	-0.00137152		760	-0.000182627
					761	0.00064369		761	-0.0012033		761	0.000562259		761	0.000478612		761	0.000653394		761	-0.000295978
					762	0.000504985		762	-0.000512081		762	0.000295861		762	0.000141365		762	0.0016281		762	-0.000970358
					763	0.000417282		763	0.000169705		763	0.00104907		763	-0.000855264		763	0.00215296		763	-0.000615819
					764	0.00077066		764	0.00158208		764	0.000761856		764	-0.00150126		764	0.00291836		764	-0.000432413
					765	-0.000724805		765	0.00159505		765	0.000444214		765	-0.00128661		765	0.00319467		765	-2.0191e-05
					766	-0.000719031		766	-0.000221355		766	0.000256123		766	-0.000661289		766	0.00199228		766	0.000290794
					767	-0.000251937		767	-0.00046712		767	0.000277564		767	-0.00107529		767	0.000971592		767	0.00122049
					768	-0.000433441		768	-0.000982227		768	-9.14807e-05		768	0.000291402		768	-0.000667001		768	0.00082884
					769	-0.000423458		769	-0.000406657		769	-0.00064103		769	0.00103881		769	-0.000883086		769	-0.000554206
					770	0.0012981		770	-0.000200392		770	-0.0010411		770	0.00045694		770	-0.000756248		770	-0.0011987
					771	0.00117131		771	0.000836587		771	-0.00184172		771	-0.000254183		771	-0.000496063		771	-0.00121471
					772	0.000176275		772	0.000884299		772	-0.00098289		772	0.000425455		772	7.78993e-05		772	-0.00132228
					773	0.000943075		773	0.00157276		773	-0.000534646		773	-0.00142413		773	0.000506075		773	-0.000761463
					774	0.000431802		774	5.19965e-05		774	-0.000217002		774	-2.4345e-06		774	0.000158909		774	0.000617676
					775	-0.00040745		775	-0.00085798		775	0.00015002		775	-0.0014609		775	5.6853e-05		775	0.00103508
					776	-0.000914588		776	-0.00160715		776	0.000266401		776	-0.000308056		776	0.000580364		776	0.000850698
					777	-9.51628e-06		777	-0.00146549		777	-0.00049788		777	0.000285635		777	0.00109991		777	0.000834466
					778	-0.00055214		778	-0.00126298		778	-0.000852844		778	0.00179019		778	0.00297596		778	-0.000363672
					779	0.000837641		779	-0.000539607		779	-0.000918512		779	1.9e-07		779	0.00356899		779	-0.000343776
					780	0.00105992		780	-0.000135348		780	-0.000754907		780	7.35e-07		780	0.0043795		780	-0.000165906
					781	0.000574809		781	-0.000160184		781	-0.000492049		781	0.00179918		781	0.00389797		781	0.000509879
					782	-0.000787601		782	-0.000314096		782	-0.000399961		782	0.00117735		782	0.0031449		782	-0.000136483
					783	-0.000817202		783	-0.000597064		783	-0.000448665		783	0.00153648		783	0.0022008		783	-0.000285051
					784	8.69274e-05		784	0.000140932		784	-0.000278184		784	0.000496562		784	0.0013862		784	-0.000715889
					785	9.57943e-05		785	0.000789911		785	-0.000388541		785	-0.00111237		785	0.000441596		785	-0.000839058
					786	-0.000618105		786	0.00105989		786	4.02405e-05		786	-0.00155029		786	-0.00102247		786	-0.00158462
					787	0.000104585		787	0.0018109		787	0.000258138		787	4.15275e-06		787	-0.00243546		787	-0.00142264
					788	-0.00026938		788	0.00151294		788	-0.000514874		788	-0.00166306		788	-0.00344684		788	-0.000693182
					789	0.000130111		789	0.000276055		789	-0.000238818		789	-0.00115787		789	-0.00341605		789	-0.000196308
					790	-0.00032683		790	7.02477e-05		790	0.00161628		790	-0.000411598		790	-0.00338254		790	-0.000512083
					791	-0.00158009		791	3.55431e-05		791	0.0023804		791	-0.000104233		791	-0.00261575		791	-0.000160574
					792	-0.00135955		792	-0.00171804		792	0.00245351		792	-0.000725753		792	-0.00166511		792	-0.000161845
					793	-0.00124509		793	-3.46687e-05		793	0.00316559		793	-0.00079614		793	-0.00100003		793	0.000134037
					794	-0.0017366		794	-2.99191e-05		794	0.00315661		794	0.000614626		794	-0.000869932		794	-9.29954e-05
					795	-0.00127396		795	-0.00144184		795	0.00145655		795	0.000566564		795	-0.00147423		795	0.000556992
					796	-0.000687044		796	-0.000670731		796	0.000645381		796	0.000599692		796	-0.00198231		796	0.00039393
					797	-0.000465732		797	-3.83938e-05		797	0.000523076		797	0.000584032		797	-0.00299359		797	0.00047775
					798	0.000220099		798	0.00145519		798	-0.000100392		798	-0.000180398		798	-0.00297744		798	0.000448385
					799	0.000700576		799	-1.56e-07		799	-3.50474e-05		799	-0.00161358		799	-0.00380324		799	0.00104576
					800	0.00127582		800	0.00113617		800	-0.000330919		800	-0.00137549		800	-0.00327036		800	0.00107982
					801	0.000155969		801	-0.000676384		801	-0.000728034		801	-0.00146611		801	-0.00219819		801	0.000740479
					802	0.000341143		802	-0.000137613		802	-0.000336421		802	0.000324584		802	-0.000586061		802	0.00118767
					803	0.000741476		803	-0.000667493		803	-0.000246106		803	0.0013066		803	-0.000113339		803	0.000501327
					804	0.0012371		804	0.000373998		804	-0.000297119		804	-5.78e-07		804	0.000510634		804	-0.000508627
					805	0.000608144		805	0.00065688		805	-0.000319488		805	0.00179472		805	0.000906519		805	-0.000562263
					806	0.000624748		806	0.00126117		806	2.67584e-05		806	-3.47963e-06		806	0.00171499		806	-0.000549654
					807	0.000347045		807	0.000966902		807	-0.00168841		807	0.000208407		807	0.00225671		807	-0.000890873
					808	-0.000784827		808	0.000234085		808	-0.00121502		808	-0.00037261		808	0.00263238		808	-0.000315994
					809	-0.000890729		809	-0.000997256		809	-0.0014031		809	-0.00146217		809	0.00316267		809	0.000114909
					810	-0.000780521		810	-0.0005471		810	-0.00132269		810	-0.000850257		810	0.0032583		810	0.00050176
					811	0.000603798		811	-0.00076355		811	-0.000286815		811	-0.000947419		811	-0.000233943		811	0.00093304
					812	0.000883541		812	-0.00119697		812	-7.32e-07		812	6.32999e-05		812	0.000121264		812	0.00101094
					813	0.000894231		813	-0.00104024		813	-0.000863312		813	-0.000436155		813	-0.0152246		813	-0.000551244
					814	-0.00220413		814	-0.00105336		814	-0.00166445		814	-0.00160576		814	-0.0624819		814	-0.00606346
					815	-0.00578154		815	-0.00400632		815	-0.00105406		815	-0.0047555		815	-0.133401		815	-0.0169856
					816	-0.012008		816	-0.00666911		816	0.00158797		816	-0.00857534		816	-0.219681		816	-0.0306678
					817	-0.0169635		817	-0.00993172		817	0.00644173		817	-0.0118253		817	-0.302124		817	-0.0426697
					818	-0.0198581		818	-0.0134541		818	0.0123273		818	-0.0137653		818	-0.352919		818	-0.0488515
					819	-0.0194517		819	-0.0163464		819	0.0173848		819	-0.0139653		819	-0.361637		819	-0.0482531
					820	-0.0161544		820	-0.0157484		820	0.0202943		820	-0.0115454		820	-0.338807		820	-0.0406244
					821	-0.00995607		821	-0.0131002		821	0.0204458		821	-0.00861549		821	-0.29618		821	-0.0278854
					822	-0.00491683		822	-0.00902176		822	0.0173596		822	-0.00668557		822	-0.253527		822	-0.015746
					823	-0.000486635		823	-0.00518312		823	0.0113155		823	-0.00558563		823	-0.222147		823	-0.0066762
					824	0.00345451		824	-0.00231424		824	0.00312378		824	-0.00556565		824	-0.19887		824	0.000204057
					825	0.0040366		825	-0.000275122		825	-0.00365556		825	-0.0060856		825	-0.180527		825	0.00445481
					826	0.00330964		826	0.000364242		826	-0.00995246		826	-0.00659548		826	-0.164268		826	0.00717611
					827	0.00329363		827	-9.61423e-05		827	-0.0149368		827	-0.00571528		827	-0.148964		827	0.00890799
					828	0.00390856		828	0.00021373		828	-0.0161986		828	-0.00465496		828	-0.136013		828	0.0103105
					829	0.00238444		829	-0.000206138		829	-0.0137977		829	-0.00263452		829	-0.122267		829	0.0114836
					830	0.00215127		830	-0.000505739		830	-0.0107842		830	-0.00179395		830	-0.109596		830	0.0122975
					831	0.000899036		831	-0.00091507		831	-0.00705783		831	-0.000463235		831	-0.0968698		831	0.0122221
					832	-0.00116225		832	-0.00104413		832	-0.00341866		832	-0.000372353		832	-0.0855284		832	0.0114674
					833	0.000103366		833	-0.00148291		833	-0.00317663		833	-0.000461296		833	-0.0760622		833	0.00944356
					834	-4.86516e-05		834	-0.000951409		834	-0.00317168		834	-0.000320052		834	-0.0687513		834	0.00620053
					835	-0.000158202		835	-0.000359627		835	-0.00425376		835	0.000541392		835	-0.0627758		835	0.00203837
					836	-0.00210802		836	0.000652441		836	-0.00624283		836	0.000803046		836	-0.059706		836	-0.000652908
					837	-0.000414629		837	0.0012848		837	-0.00715884		837	-0.000355078		837	-0.0574119		837	-0.00254326
					838	3.96938e-05		838	0.00068744		838	-0.00697178		838	-0.00081297		838	-0.0543636		838	-0.00314267
					839	-0.000885056		839	3.74e-07		839	-0.00628158		839	-0.00218062		839	-0.0515114		839	-0.0026511
					840	-0.00072888		840	0.000423599		840	-0.00589822		840	-0.000655721		840	-0.0494453		840	-0.00130853
					841	-0.000201783		841	-0.000472883		841	-0.00531168		841	-0.000644887		841	-0.0484654		841	-0.000654937
					842	-0.000773767		842	-0.00110907		842	-0.00538192		842	-0.00199203		842	-0.0478418		842	-0.000540294
					843	-0.00168483		843	-0.000594971		843	-0.00478893		843	-0.00176862		843	-0.0504648		843	-0.00061458
					844	-0.00172499		844	-0.000120577		844	-0.00429266		844	-0.000694924		844	-0.0526143		844	-0.00204777
					845	-0.00196423		845	-0.00157589		845	-0.00396312		845	-0.00053094		845	-0.0533104		845	-0.000919857
					846	-0.00120257		846	-0.00225092		846	-0.00348027		846	-0.000256657		846	-0.0524233		846	0.000629192
					847	-0.00118001		847	-0.00173565		847	-0.00214411		847	-0.00159207		847	-0.052173		847	0.00165939
					848	-0.00126655		848	-0.000990103		848	-0.00105462		848	-0.000847173		848	-0.0497597		848	0.00166075
					849	-0.00193219		849	-0.00184427		849	-0.0010918		849	-0.000561961		849	-0.0478134		849	0.0030233
					850	-0.00237694		850	-0.00153815		850	-0.00157564		850	-0.000556428		850	-0.0467241		850	0.00243704
					851	-0.000854189		851	-0.000811754		851	-0.00130613		851	-0.00128057		851	-0.046722		851	0.00168198
					852	-0.00280379		852	-0.000935081		852	-0.00140327		852	-0.000564388		852	-0.0448171		852	0.00198815
					853	-0.0020359		853	-0.000468136		853	-0.00136707		853	-0.000557873		853	-0.0426195		853	0.00245555
					854	-0.000677133		854	0.00107908		854	-0.00128753		854	-0.00102102		854	-0.0410192		854	0.0015042
					855	0.000852503		855	0.000796558		855	-0.00109465		855	-0.000703839		855	-0.0390163		855	0.00131409
					856	0.000743002		856	0.000424297		856	-0.00143845		856	-0.000196316		856	-0.0356708		856	0.00175524
					857	-0.000797595		857	-0.000937709		857	-0.00145893		857	0.000731546		857	-0.0332528		857	0.000617659
					858	-0.000770671		858	-0.00215946		858	-0.00152612		858	-0.000130252		858	-0.0306322		858	0.000311347
					859	0.00121963		859	-0.000413724		859	-0.00110003		859	-8.17095e-05		859	-0.0272092		859	0.00094631
					860	-0.000216466		860	-0.00225225		860	0.000229322		860	-0.000462827		860	-0.0246037		860	0.00130255
					861	-0.000361726		861	-0.00161329		861	0.000451912		861	-0.00114361		861	-0.0221458		861	0.00130007
					862	3.38455e-05		862	-0.000314105		862	0.000417714		862	-0.00127404		862	-0.0203055		862	0.00145888
					863	0.000410243		863	-0.000334702		863	0.000466701		863	1.5853e-05		863	-0.0189328		863	0.00158896
					864	0.000257459		864	0.000384912		864	-0.00042116		864	0.000966085		864	-0.0182577		864	0.00149033
					865	0.00017549		865	0.00094473		865	-0.0008559		865	0.00184665		865	-0.0173302		865	0.00112297
					866	-0.000615673		866	0.000424743		866	-0.000787556		866	-7.89988e-05		866	-0.0164903		866	0.00126689
					867	-0.00147603		867	-1.50574e-05		867	-0.00104617		867	-6.38691e-05		867	-0.015418		867	0.000712073
					868	-0.0014256		868	0.000175321		868	-0.00128177		868	-4.96878e-05		868	-0.0146433		868	0.000118524
					869	-0.00070438		869	-0.000154131		869	-0.00100442		869	0.00155216		869	-0.0135061		869	6.23191e-06
					870	0.000797621		870	0.000116576		870	-0.00134415		870	0.000884335		870	-0.0122665		870	-0.000214811
					871	-0.000225904		871	5.74336e-05		871	-0.00130102		871	0.000456814		871	-0.0107943		871	-0.000504613
					872	0.00105394		872	4.84311e-05		872	-0.00152508		872	0.000539593		872	-0.0100797		872	0.00107682
					873	-1.17585e-05		873	0.000609558		873	-0.000656376		873	-0.000147333		873	-0.00913248		873	0.00111946
					874	-0.0013867		874	0.0012408		874	-0.000584975		874	0.000556029		874	-0.00804267		874	0.000943316
					875	-0.0019809		875	5.21571e-05		875	-0.000800932		875	0.000829671		875	-0.0074302		875	0.000678362
					876	-0.00143437		876	0.000523606		876	-0.00102431		876	0.000403587		876	-0.00660504		876	-0.000635413
					877	-0.000137104		877	0.00139514		877	-0.000865179		877	0.00111777		877	-0.00667711		877	-0.00102803
					878	0.000630883		878	0.00178674		878	-0.0014236		878	0.0011422		878	-0.00721636		878	-0.000959493
					879	0.000629583		879	0.000668411		879	-0.000939648		879	0.000936883		879	-0.00737272		879	-0.000939832
					880	0.000908988		880	0.000740122		880	-0.000853394		880	0.000431801		880	-0.00656611		880	-0.000989063
					881	0.00080909		881	0.000761867		881	-0.000414915		881	0.000256945		881	-0.00620647		881	-0.000977205
					882	-0.00049012		882	0.00130363		882	-0.000364288		882	-0.000867695		882	-0.00470371		882	-0.00199428
					883	-0.00076865		883	0.000865403		883	-5.15957e-05		883	-0.000642131		883	-0.00288774		883	-0.00163031
					884	-0.00023651		884	0.000867165		884	-0.000246921		884	-0.000826374		884	-0.00297847		884	-0.00083532
					885	-0.000583708		885	0.0013589		885	-0.00047035		885	-0.000700436		885	-0.00353581		885	-0.000769334
					886	0.000419748		886	0.00173061		886	-0.000451973		886	-0.00068433		886	-0.00559965		886	-0.000692377
					887	0.00194385		887	0.000892253		887	0.000938119		887	-0.000748069		887	-0.00763989		887	-0.00170448
					888	0.00210858		888	0.000563831		888	0.00143983		888	-0.00151167		888	-0.00872642		888	-0.00246566
					889	0.00226394		889	0.000565325		889	0.00216307		889	-0.00201514		889	-0.00128894		889	-0.00349596
					890	0.000331676		890	-0.000973283		890	0.00300773		890	7.35887e-05		890	-0.000992686		890	-0.0029954
					891	0.00123649		891	0.000256391		891	0.00197371		891	-0.00172176		891	-0.00937257		891	-0.00231402
					892	0.000443665		892	0.00025736		892	0.00070091		892	-0.00143494		892	-0.00707305		892	-0.00184184
					893	0.000561425		893	0.000257041		893	0.000539217		893	-0.00175805		893	-0.00476919		893	-0.000888908
					894	0.000389761		894	0.000255469		894	0.000138523		894	-0.00115111		894	-0.00132085		894	-0.000865251
					895	-0.000411338		895	-0.00106844		895	-9.1285e-05		895	0.000235859		895	0.0011021		895	-0.00103091
					896	0.000448118		896	-0.000288017		896	0.00165968		896	-0.000207156		896	0.00201983		896	-0.00116591
					897	0.000198117		897	0.000852179		897	0.00173129		897	-0.000330174		897	0.00237249		897	-0.000370303
					898	-0.000981349		898	0.000272129		898	0.000323435		898	0.000626788		898	0.00140023		898	-0.00160412
					899	-0.000650294		899	0.000101816		899	-0.000264013		899	0.000563709		899	3.2268e-06		899	-0.00149741
					900	-0.000338726		900	0.000321219		900	-0.000391179		900	-0.000149429		900	-0.000298361		900	-0.0002702
					901	-0.00124666		901	0.000820317		901	-0.00159819		901	-0.000602646		901	5.56442e-05		901	0.00113746
					902	-0.000574102		902	0.00148909		902	-0.00208519		902	-0.000585963		902	-0.000554579		902	0.00262552
					903	0.000238933		903	0.00137752		903	-0.00142229		903	4.05998e-05		903	-0.000318847		903	0.00460394
					904	0.000112434		904	0.00128558		904	-0.00150965		904	0.00106702		904	0.00118303		904	0.00530267
					905	-0.000403611		905	0.000943252		905	-0.0015174		905	0.00216328		905	0.00170124		905	0.00382168
					906	-0.00138921		906	0.000360515		906	-0.000955677		906	0.00231935		906	0.00205599		906	0.0024509
					907	-0.00153439		907	0.000157345		907	-0.00148463		907	0.00160521		907	0.00300748		907	0.000850289
					908	-0.00160914		908	-0.000596281		908	-0.00192441		908	0.000360848		908	0.00328591		908	-9.02001e-05
					909	-0.00163348		909	0.000169616		909	-0.00179517		909	-0.000643775		909	0.00294151		909	-0.000410621
					910	-0.000367437		910	0.000475011		910	-0.00127705		910	-0.00203868		910	0.00313447		910	0.000718974
					911	0.000848992		911	0.00124988		911	-0.000640209		911	1.25135e-05		911	0.00260504		911	0.00041853
					912	4.57891e-05		912	0.000414202		912	0.000715188		912	8.39602e-06		912	0.00248344		912	0.000647993
					913	1.29424e-05		913	0.00086795		913	0.00206898		913	-0.00183531		913	0.00346989		913	6.73063e-05
					914	-0.000739562		914	-0.000518901		914	0.00168101		914	-0.00159158		914	0.00349464		914	0.000556413
					915	-0.00178174		915	-0.00151637		915	0.000781116		915	-0.00097826		915	0.00297793		915	0.000455255
					916	-0.00164359		916	-3.31e-07		916	-0.000530882		916	0.000534626		916	0.00227		916	0.000513773
					917	-0.000265147		917	-0.00103329		917	-0.00067515		917	0.00216705		917	0.00102111		917	-0.000258094
					918	0.000573588		918	-0.00030279		918	-0.000701863		918	0.00133899		918	-0.000208489		918	-0.000260406
					919	0.0009126		919	-0.000103014		919	0.000138803		919	0.000750401		919	0.000211467		919	-0.00106323
					920	0.00169187		920	0.000296009		920	0.00182667		920	0.00127127		920	0.000241242		920	-0.00131662
					921	0.0010114		921	-0.000125748		921	0.00293155		921	0.000361561		921	-8.89052e-06		921	-0.00123065
					922	-0.000238847		922	-0.00100831		922	0.00278327		922	-0.000458755		922	0.000591344		922	-0.000945392
					923	-0.000838871		923	-0.00129172		923	0.00166163		923	-0.000319708		923	-0.000147773		923	-0.0028009
					924	-0.000158688		924	-0.000765982		924	0.00117645		924	-0.00052133		924	-0.000905956		924	-0.00369725
					925	0.000191685		925	-0.00038114		925	-9.24647e-05		925	-0.000563651		925	-0.00201292		925	-0.0052245
					926	0.000982236		926	0.00068278		926	-0.00169531		926	0.000603296		926	-0.00151835		926	-0.00896274
					927	0.00150295		927	0.00086575		927	-0.00184229		927	0.00184948		927	-0.00146197		927	-0.015962
					928	0.00145381		928	0.000757739		928	-0.0019836		928	0.00170487		928	-0.000353466		928	0.000416859
					929	0.000764798		929	6.8718e-05		929	-0.00137944		929	0.00226942		929	0.000297476		929	0.000435444
					930	-0.000204095		930	-0.000351343		930	-0.00109002		930	-4.91303e-05		930	0.00118117		930	0.000451822
					931	-0.000272886		931	-0.000902475		931	0.000154451		931	0.00150591		931	0.00132793		931	0.000465823
					932	2.84096e-05		932	-0.00133471		932	-0.000366235		932	0.000627773		932	0.00118808		932	0.000477276
					933	0.000659775		933	-0.00208808		933	-0.000362293		933	0.00161867		933	0.000231964		933	-0.013694
					934	0.000711195		934	-0.000992608		934	-0.00134394		934	0.00146856		934	-0.000120098		934	-0.00297271
					935	0.000712654		935	0.000231664		935	-0.0011314		935	-0.000412593		935	0.000242236		935	0.00534688
					936	0.000384135		936	-5.29399e-06		936	-0.00133488		936	-0.00134482		936	0.00116931		936	0.00875473
					937	-0.000334377		937	0.000736487		937	-0.000224617		937	-0.00202816		937	0.00121148		937	0.00938074
					938	-0.0014029		938	0.00101697		938	0.000269164		938	-0.00204265		938	0.00184909		938	0.00928485
					939	-0.00153145		939	0.00134613		939	0.000906235		939	-0.00205833		939	0.0010925		939	0.00877695
					940	-0.00195004		940	-0.000126074		940	0.000486362		940	-0.000545241		940	0.000232078		940	0.00744697
					941	-0.00162869		941	0.000180326		941	0.00153931		941	0.000256583		941	-0.00109181		941	0.00656482
					942	-0.00119741		942	0.000515296		942	0.000894846		942	0.0013271		942	-0.00188879		942	0.00488041
					943	0.000203767		943	0.0008488		943	0.000862725		943	0.00061627		943	-0.00182849		943	0.00276364
					944	0.00144484		944	0.000460805		944	0.0010827		944	-0.000685948		944	-0.00216052		944	0.000914442
					945	0.00171578		945	0.000861274		945	0.00139454		945	-0.00153959		945	-0.00297449		945	2.70713e-06
					946	0.00129657		946	0.000720171		946	0.000547983		946	-0.00120471		946	-0.00506001		946	-0.000591653
					947	0.000867209		947	-0.000152539		947	0.000592782		947	-0.00170134		947	-0.00551669		947	-0.000388733
					948	-0.000382337		948	-0.000246894		948	0.000688684		948	-0.00105952		948	-0.00705411		948	-0.000258627
					949	-0.00113208		949	-0.000342929		949	0.00137543		949	0.000830706		949	-0.00575189		949	0.000948568
					950	-0.000332042		950	0.000419318		950	0.00106277		950	0.00188929		950	-0.00340959		950	0.00111275
					951	-0.000352237		951	-0.000140191		951	0.000900433		951	0.00149618		951	0.000143184		951	0.000723836
					952	4.7315e-05		952	-0.000601493		952	0.00129816		952	0.00156135		952	0.00152687		952	-0.00027829
					953	0.000406597		953	-0.000514627		953	0.000635679		953	0.000564747		953	0.00327189		953	-0.000753723
					954	0.000355589		954	-0.000179631		954	-0.000397275		954	-0.000473678		954	0.00293867		954	-0.00234257
					955	-0.000105728		955	-0.000496545		955	-0.000350975		955	-0.00173397		955	0.00176765		955	-0.00359492
					956	-0.000347371		956	-1.54069e-05		956	-0.000295696		956	-0.00152617		956	0.000809276		956	-0.00369089
					957	-7.93599e-05		957	0.000593743		957	-0.00122172		957	-0.000950325		957	0.000903989		957	-0.00301058
					958	8.28612e-06		958	0.000640865		958	-0.00175931		958	0.000363513		958	0.00148224		958	-0.0024641
					959	0.000215548		959	7.59184e-05		959	-0.00169877		959	0.000925297		959	0.00251449		959	-0.00113155
					960	0.000382406		960	-0.000441137		960	-0.00190038		960	0.000624981		960	0.00362119		960	-0.00120305
					961	0.000104941		961	-0.000248757		961	-3.84448e-05		961	0.00141585		961	0.00292105		961	0.00136151
					962	0.000494265		962	-6.99812e-06		962	5.06165e-05		962	0.000974364		962	0.00391748		962	0.00177908
					963	0.000264656		963	-0.000344731		963	0.000790581		963	-0.000987815		963	-0.0135093		963	0.000516051
					964	-0.00153387		964	-0.000631965		964	-0.00028849		964	-0.00340072		964	-0.0620697		964	-0.0042676
					965	-0.0057413		965	-0.00362871		965	-0.000356536		965	-0.00575437		965	-0.131694		965	-0.0100619
					966	-0.0110276		966	-0.00680497		966	0.000816501		966	-0.00892881		966	-0.215172		966	-0.0159968
					967	-0.0168128		967	-0.0112008		967	0.00573068		967	-0.0104841		967	-0.292905		967	-0.0200024
					968	-0.0202869		968	-0.0145461		968	0.011646		968	-0.0102001		968	-0.335872		968	-0.0201987
					969	-0.0211698		969	-0.0175609		969	0.0176927		969	-0.00917707		969	-0.337254		969	-0.0166757
					970	-0.0182615		970	-0.0164254		970	0.0204006		970	-0.00700489		970	-0.311771		970	-0.0109833
					971	-0.0134421		971	-0.0140894		971	0.0209899		971	-0.00522362		971	-0.268084		971	-0.00497168
					972	-0.00838153		972	-0.0107529		972	0.0172206		972	-0.00442327		972	-0.224962		972	-0.00217076
					973	-0.00294976		973	-0.00760604		973	0.0113527		973	-0.00506387		973	-0.197696		973	-0.00117056
					974	0.000583202		974	-0.00433875		974	0.00375632		974	-0.00500544		974	-0.178926		974	-0.00167109
					975	0.00189736		975	-0.00296107		975	-0.00156852		975	-0.004718		975	-0.163363		975	-0.00240237
					976	0.00218272		976	-0.00319299		976	-0.00728177		976	-0.00491157		976	-0.151186		976	-0.0031644
					977	0.00217929		977	-0.00336452		977	-0.0100234		977	-0.00477616		977	-0.139565		977	-0.00278718
					978	0.000757067		978	-0.00354567		978	-0.0120134		978	-0.0033818		978	-0.126952		978	0.000255137
					979	-0.000493944		979	-0.00433645		979	-0.0108716		979	-0.000788492		979	-0.113195		979	-0.00181506
					980	-9.37427e-05		980	-0.00407687		980	-0.00827816		980	0.000103739		980	-0.101136		980	-0.00120016
					981	-0.000292327		981	-0.00284694		981	-0.00498291		981	0.00214488		981	-0.0874245		981	-0.00066604
					982	0.000210303		982	-0.00205667		982	-0.00357586		982	-0.000645837		982	-0.0763604		982	3.7286e-05
					983	-2.58541e-05		983	-0.00154605		983	-0.00268697		983	-0.000548407		983	-0.066234		983	0.000579818
					984	0.0003492		984	-0.00103511		984	-0.00383621		984	0.000271652		984	-0.0587956		984	0.00111155
					985	-0.00102454		985	-0.000373848		985	-0.00485355		985	-0.000471684		985	-0.0514752		985	0.00183248
					986	-0.00097707		986	-0.000522275		986	-0.00572898		986	-0.00126617		986	-0.0462131		986	0.000952606
					987	-0.0015984		987	0.000209601		987	-0.00600245		987	-0.000270779		987	-0.0417893		987	0.000341922
					988	-0.00248854		988	0.000831772		988	-0.00573395		988	-0.000203293		988	-0.0397441		988	-3.95736e-05
					989	-0.00353749		989	0.00103423		989	-0.00538346		989	-0.000133527		989	-0.0371374		989	-0.00168188
					990	-0.00288525		990	0.000996965		990	-0.00659095		990	-0.00182572		990	-0.0356695		990	0.000186504
					991	-0.00229185		991	0.00013997		991	-0.00734641		991	-0.00166605		991	-0.0344905		991	0.000176737
					992	-0.00253727		992	-0.000466764		992	-0.00765982		992	-0.000857563		992	-0.0345504		992	0.000166412
					993	-0.00217155		993	-0.000803244		993	-0.00798116		993	0.000409731		993	-0.0340494		993	0.000155675
					994	-0.00134468		994	-0.000999478		994	-0.00618041		994	0.000875832		994	-0.0351175		994	-0.00119567
					995	-0.00131667		995	-0.00115548		995	-0.00416758		995	0.00129074		995	-0.0355748		995	0.000627116
					996	-0.00172754		996	-0.000961245		996	-0.00197263		996	0.00141445		996	-0.0364315		996	0.00188909
					997	-0.00177731		997	-0.00148679		997	-0.00105558		997	0.00153696		997	-0.0366976		997	0.00206025
					998	-0.00198598		998	-0.00159213		998	-0.000376396		998	0.00122828		998	-0.0367331		998	0.00141061
					999	-0.00206358		999	-0.00107726		999	-0.000505086		999	0.00140841		999	-0.0360581		999	0.00152015
					1000	-0.00286011		1000	-0.0010522		1000	0.000198357		1000	0.00147735		1000	-0.0358027		1000	0.000678882
					1001	-0.00235559		1001	-0.000816943		1001	-0.000206062		1001	0.00167509		1001	-0.0360069		1001	0.000936815
					1002	-0.00278005		1002	-0.00117151		1002	9.16583e-05		1002	0.00126166		1002	-0.0359507		1002	0.000383949
					1003	-0.0029235		1003	-0.00197591		1003	0.000431517		1003	0.00104705		1003	-0.0351443		1003	0.000330289
					1004	-0.00314596		1004	-0.00291013		1004	0.000583513		1004	0.000251266		1004	-0.0345976		1004	-0.000754161
					1005	-0.00167744		1005	-0.00282421		1005	-0.000372357		1005	-0.000715682		1005	-0.0344605		1005	-0.00142939
					1006	-0.00115798		1006	-0.00252814		1006	-0.0012161		1006	-0.000683786		1006	-0.0323233		1006	-0.00152541
					1007	-3.75873e-05		1007	-0.000971924		1007	-0.00189771		1007	-0.000173037		1007	-0.0311058		1007	-8.2191e-05
					1008	-0.0016656		1008	-5.55786e-05		1008	-0.00199722		1008	0.000206574		1008	-0.0295881		1008	0.00120026
					1009	-0.000264115		1009	0.000250891		1009	-0.00181461		1009	0.00152506		1009	-0.0272101		1009	0.00148195
					1010	-0.000881082		1010	-0.000112524		1010	-0.00100991		1010	0.00232243		1010	-0.0251418		1010	0.00204289
					1011	-0.00153722		1011	0.00028417		1011	0.000576865		1011	0.00197869		1011	-0.0239133		1011	-8.88e-07
					1012	-0.00254255		1012	-0.000399036		1012	0.00109571		1012	0.00188386		1012	-0.0214445		1012	0.00181255
					1013	-0.0030571		1013	-0.00129215		1013	0.00104661		1013	0.00109796		1013	-0.0202053		1013	0.000681294
					1014	-0.00235091		1014	-0.00101518		1014	0.000449547		1014	-7.89988e-05		1014	-0.0180657		1014	0.000259317
					1015	-0.00255399		1015	-0.00077813		1015	-0.000275503		1015	-0.00122701		1015	-0.0149158		1015	0.000386635
					1016	-0.00149639		1016	-0.00110101		1016	-0.00198856		1016	-0.00139604		1016	-0.0124654		1016	-0.000516743
					1017	-0.000618118		1017	-0.000913835		1017	-0.00273964		1017	-0.00133609		1017	-0.0106844		1017	-0.00125081
					1018	0.000500777		1018	-0.000196603		1018	-0.00234877		1018	-0.000837125		1018	-0.00853288		1018	-0.000425541
					1019	0.000910268		1019	0.000120674		1019	-0.00140598		1019	-0.000439135		1019	-0.00811067		1019	-6.09378e-05
					1020	-0.000969002		1020	0.000297989		1020	-0.0011513		1020	0.000967903		1020	-0.00853773		1020	-0.000396984
					1021	-0.000249095		1021	0.000735334		1021	-0.000624741		1021	0.00105401		1021	-0.00775397		1021	-0.000203667
					1022	-0.000618019		1022	0.0015427		1022	-0.000646347		1022	0.000839208		1022	-0.00689929		1022	0.000269027
					1023	-0.000726485		1023	0.00191008		1023	-0.00192615		1023	0.000803521		1023	-0.0064536		1023	0.00013111
					1024	-0.00150453		1024	-0.000247229		1024	-0.00171417		1024	0.00153697		1024	-0.0056868		1024	0.000662598
					1025	-0.000697577		1025	-0.000191882		1025	-0.00159046		1025	0.000619587		1025	-0.00461877		1025	0.000423505
					1026	-0.00186951		1026	0.00177224		1026	-0.00108505		1026	0.000141391		1026	-0.00387941		1026	0.000113846
					1027	-0.00135652		1027	0.000909606		1027	0.000512032		1027	0.00083241		1027	-0.00368858		1027	-0.000386365
					1028	-0.00211327		1028	0.000416947		1028	0.000900736		1028	0.000472672		1028	-0.00303616		1028	-0.00068711
					1029	-0.000529795		1029	-0.00122574		1029	-0.000418978		1029	-0.000927794		1029	-0.00346201		1029	-0.00106837
					1030	0.000443863		1030	-0.00128847		1030	0.000602849		1030	-0.00068896		1030	-0.00269599		1030	-0.000300139
					1031	4.76596e-05		1031	-0.00118125		1031	0.000976173		1031	-0.000920796		1031	-0.00335795		1031	0.000127611
					1032	0.000381551		1032	-0.00112408		1032	-0.000129054		1032	-0.000783269		1032	-0.00326774		1032	0.00138489
					1033	0.00123549		1033	-0.00152697		1033	0.000837123		1033	0.000113652		1033	-0.00314518		1033	0.00183173
					1034	0.000259441		1034	-0.00180993		1034	0.00282465		1034	0.000749999		1034	-0.00207012		1034	0.00154814
					1035	-0.000936654		1035	0.000264494		1035	0.000623488		1035	0.000725806		1035	-0.00193238		1035	0.00123413
					1036	-0.000312837		1036	-0.00149608		1036	-0.000496428		1036	0.00147111		1036	-0.000161775		1036	-6.02648e-05
					1037	-0.000519158		1037	-0.00130929		1037	-0.000225146		1037	0.00136594		1037	0.000241883		1037	-0.000605032
					1038	-0.000235664		1038	-0.0011626		1038	-0.000762723		1038	0.000580339		1038	0.000828787		1038	-0.00158015
					1039	0.000717594		1039	-0.000476019		1039	-0.00174921		1039	0.000374342		1039	0.00139914		1039	-0.00190559
					1040	-0.000117599		1040	0.000520452		1040	-0.00022468		1040	0.000527987		1040	0.00176315		1040	-0.00200135
					1041	-9.25405e-05		1041	0.000396802		1041	0.00028082		1041	0.00138131		1041	0.00102103		1041	-0.00076739
					1042	0.00152544		1042	1.30234e-05		1042	-0.000452776		1042	0.000884361		1042	0.001113		1042	-0.000973694
					1043	0.00103724		1043	0.00131911		1043	-0.00023553		1043	0.00166717		1043	0.000909285		1043	0.000399761
					1044	0.000558539		1044	0.00153505		1044	-0.000957509		1044	0.00174978		1044	0.000180127		1044	0.000582999
					1045	0.000619285		1045	0.000820845		1045	-0.00150878		1045	0.000942241		1045	0.000315762		1045	0.000256043
					1046	0.000839421		1046	0.00075648		1046	-0.00190941		1046	-5.54106e-05		1046	0.000206437		1046	-0.000421083
					1047	2.3975e-05		1047	0.00103195		1047	-0.000419463		1047	0.000136872		1047	-0.000317594		1047	-0.000938353
					1048	0.00165764		1048	-8.27509e-05		1048	0.000410981		1048	-0.000800867		1048	-0.000856072		1048	-0.00233574
					1049	0.0013456		1049	0.000182368		1049	0.00109185		1049	-0.00083858		1049	-0.000968728		1049	-0.00115323
					1050	9.27216e-05		1050	0.000997301		1050	0.00148308		1050	-9.62204e-05		1050	-0.00105529		1050	-0.000910779
					1051	-2.10602e-05		1051	0.00121204		1051	0.00291458		1051	-0.000613741		1051	-0.00170548		1051	0.000161627
					1052	-0.000595806		1052	0.000806577		1052	0.00183628		1052	-0.000791092		1052	-0.00241901		1052	-0.000405981
					1053	-0.000621578		1053	0.00184091		1053	0.000648102		1053	-0.00148822		1053	-0.00328559		1053	-0.000583576
					1054	-0.000348439		1054	0.00144502		1054	-0.000460036		1054	-0.00149509		1054	-0.00321491		1054	-0.00121113
					1055	-0.000296452		1055	0.000318912		1055	-0.000448217		1055	-0.00113163		1055	-0.00379668		1055	-0.00137861
					1056	-0.000985684		1056	-0.000667425		1056	-0.00153652		1056	-0.000637798		1056	-0.00425058		1056	-0.002266
					1057	-0.000656198		1057	-0.000934		1057	-0.00165504		1057	-0.00170354		1057	-0.00414629		1057	-0.00189326
					1058	-0.000828063		1058	0.000326122		1058	-0.000253864		1058	-0.000398803		1058	-0.00369348		1058	-0.000820364
					1059	-0.00156134		1059	-0.00155789		1059	0.00102693		1059	-9.35288e-05		1059	0.000767358		1059	0.000262721
					1060	-0.00166611		1060	-0.000475213		1060	0.00175724		1060	-0.00102766		1060	0.000745298		1060	0.000806024
					1061	-0.00103243		1061	0.000257195		1061	0.00191699		1061	-0.00080115		1061	-0.00374063		1061	0.00131958
					1062	-0.00159038		1062	0.00111933		1062	0.00141607		1062	0.00024607		1062	-0.00301039		1062	0.00206341
					1063	-0.00116002		1063	0.00220119		1063	0.000634395		1063	0.00100406		1063	-0.0021399		1063	0.000937555
					1064	-0.000541427		1064	0.00216276		1064	0.000191863		1064	0.000572863		1064	-0.00115882		1064	-0.000557954
					1065	-0.000814674		1065	0.00173404		1065	-0.000461622		1065	0.000772556		1065	-0.00141675		1065	-4.30847e-05
					1066	-0.000929835		1066	0.00141502		1066	0.00031384		1066	-0.000426805		1066	-0.00158334		1066	0.000822197
					1067	-0.000596983		1067	0.000545692		1067	0.00172815		1067	-0.000295159		1067	-0.00148819		1067	0.00175792
					1068	-0.00162619		1068	-0.000453949		1068	0.0011412		1068	-0.00113244		1068	-0.00241091		1068	1.34504e-05
					1069	6.23093e-05		1069	-0.00204391		1069	0.000322888		1069	-0.000818589		1069	-0.00208111		1069	1.47181e-05
					1070	-0.00192111		1070	-0.0010642		1070	-0.00173689		1070	-0.00102354		1070	-0.00062838		1070	0.00166813
					1071	-0.00144697		1071	-0.000894823		1071	-0.00173825		1071	4.27797e-05		1071	0.000257688		1071	0.000535984
					1072	-0.0011652		1072	-0.00109579		1072	-0.00153128		1072	0.000320429		1072	0.000947511		1072	-0.00112554
					1073	0.00014412		1073	-0.000517099		1073	-0.000906119		1073	-0.000390523		1073	0.00203151		1073	-0.000986396
					1074	0.0011909		1074	0.000621235		1074	-0.000932862		1074	-0.000110008		1074	0.00171012		1074	0.00107344
					1075	0.000295076		1075	-0.000330794		1075	0.000858374		1075	0.000242045		1075	0.000603775		1075	0.00137401
					1076	-0.000343449		1076	-0.00021319		1076	-0.000652528		1076	0.0012457		1076	0.000862916		1076	0.00055535
					1077	-0.000364752		1077	0.000714039		1077	-0.00164569		1077	0.00157104		1077	0.00140799		1077	0.000417501
					1078	-0.000468919		1078	-3.9114e-05		1078	-0.00177122		1078	7.81402e-06		1078	0.00255946		1078	0.000380501
					1079	0.000253967		1079	-0.000162655		1079	-0.00028924		1079	0.000967041		1079	0.00414779		1079	-0.00095561
					1080	0.00074382		1080	-0.000626592		1080	0.000470119		1080	0.00100785		1080	0.00434344		1080	-0.00120079
					1081	0.00169055		1081	-0.00105093		1081	0.00143674		1081	0.000230626		1081	0.00372689		1081	-0.000205006
					1082	0.00118408		1082	-0.00174568		1082	0.0010505		1082	-0.00081455		1082	0.00322862		1082	0.00046179
					1083	0.00102431		1083	-0.00105084		1083	0.00079126		1083	-0.0013876		1083	0.00274912		1083	-0.000540363
					1084	0.000391151		1084	-0.00112642		1084	0.000228906		1084	-0.000708456		1084	0.00207889		1084	-0.000491423
					1085	0.00022452		1085	-0.000242434		1085	-0.000766699		1085	-0.00145703		1085	0.00255843		1085	-0.000111347
					1086	-0.00126568		1086	-0.000298881		1086	-0.00136568		1086	-0.00184325		1086	0.00203824		1086	-0.000980094
					1087	-0.00119953		1087	0.000124231		1087	-0.000478181		1087	-0.00137703		1087	0.00149884		1087	-0.000857621
					1088	-0.000317136		1088	5.68951e-05		1088	4.5672e-05		1088	-0.000458291		1088	0.000500748		1088	-0.000573882
					1089	0.000551416		1089	0.000709104		1089	0.000575741		1089	-0.000216953		1089	0.000364499		1089	0.000211165
					1090	0.00121603		1090	0.000940853		1090	0.000761888		1090	0.00138707		1090	-0.00115938		1090	0.00122756
					1091	0.00154661		1091	-0.000413906		1091	0.00126397		1091	0.00169385		1091	-0.000450339		1091	0.00173536
					1092	0.00110306		1092	0.00135294		1092	0.000981855		1092	0.00129349		1092	-0.000617838		1092	0.000954604
					1093	0.000275278		1093	0.000513266		1093	7.53924e-05		1093	0.00163606		1093	-0.00113132		1093	0.000645335
					1094	-0.000446825		1094	0.000593105		1094	-0.000845559		1094	0.00118165		1094	-0.000930231		1094	-0.000342399
					1095	-0.00112335		1095	0.00012245		1095	-0.00132115		1095	-0.000389653		1095	-0.000293997		1095	1.19029e-05
					1096	-5.44017e-05		1096	-0.000258704		1096	-0.00117151		1096	-0.00121776		1096	-0.00128205		1096	-0.00195307
					1097	0.00105992		1097	-0.000430365		1097	-0.000726815		1097	-0.000932577		1097	-0.0009738		1097	-0.00143591
					1098	0.000879525		1098	0.000337462		1098	0.000312804		1098	-0.00129402		1098	-0.00071867		1098	-0.000357031
					1099	0.000294298		1099	-0.00115523		1099	0.00094719		1099	-0.000712		1099	-0.000946065		1099	0.000353626
					1100	0.00012414		1100	-0.00181845		1100	0.00138619		1100	0.00125358		1100	-0.000945384		1100	0.00138611
					1101	-0.000291053		1101	-3.37528e-05		1101	0.00112964		1101	0.0019228		1101	-0.000866021		1101	0.00127046
					1102	-0.000881386		1102	-0.000986484		1102	0.0011474		1102	0.00178577		1102	-0.00153736		1102	0.000856739
					1103	-0.000886964		1103	-0.000711315		1103	0.0010993		1103	-5.64e-07		1103	-0.00178879		1103	0.00029499
					1104	-0.000567895		1104	-0.000216697		1104	0.000705184		1104	0.00141331		1104	-0.00241968		1104	-0.000194734
					1105	-0.000544285		1105	0.000217365		1105	0.000264887		1105	0.000228078		1105	-0.00230941		1105	-0.000112381
					1106	-0.000476244		1106	0.000670864		1106	0.000148249		1106	-0.000813034		1106	-0.000847315		1106	-0.0004579
					1107	-0.00096388		1107	-7.62071e-05		1107	-0.0010549		1107	-0.00134992		1107	0.000727231		1107	-0.000451239
					1108	-0.000647303		1108	0.000266147		1108	-0.00155471		1108	-7.03973e-05		1108	0.000664884		1108	-0.000482344
					1109	-0.000426626		1109	0.00138792		1109	-0.00116137		1109	-0.00106064		1109	0.0016563		1109	1.88377e-05
					1110	-0.000511958		1110	0.0023291		1110	-0.000625042		1110	-0.000524274		1110	0.00222215		1110	0.00012236
					1111	-0.000325941		1111	0.00157664		1111	0.000272434		1111	0.00138905		1111	0.000529837		1111	0.000616297
					1112	-0.000153892		1112	0.00225853		1112	0.000576654		1112	0.00242715		1112	-0.000951522		1112	0.00113352
					1113	-0.000402196		1113	0.00227061		1113	4.26577e-05		1113	0.00251431		1113	-0.00991429		1113	0.00160003
					1114	-0.00335086		1114	0.000912842		1114	-0.00163956		1114	-5.94663e-05		1114	-0.0484187		1114	-0.00215414
					1115	-0.0075299		1115	-0.0013548		1115	-0.00187999		1115	-0.00293417		1115	-0.111525		1115	-0.00794896
					1116	-0.0131893		1116	-0.00488236		1116	-0.00021866		1116	-0.00593978		1116	-0.189773		1116	-0.0139844
					1117	-0.0183891		1117	-0.0103099		1117	0.00374444		1117	-0.0089663		1117	-0.268253		1117	-0.0187804
					1118	-0.0224893		1118	-0.0151974		1118	0.00912931		1118	-0.0104937		1118	-0.320286		1118	-0.020397
					1119	-0.0222699		1119	-0.0172849		1119	0.0151159		1119	-0.00988202		1119	-0.331672		1119	-0.0171541
					1120	-0.020161		1120	-0.0170725		1120	0.0194643		1120	-0.0090412		1120	-0.310599		1120	-0.0115317
					1121	-0.0149624		1121	-0.0136201		1121	0.0203544		1121	-0.00729124		1121	-0.267981		1121	-0.00481975
					1122	-0.00984429		1122	-0.00821793		1122	0.0180263		1122	-0.00475213		1122	-0.220595		1122	0.000191738
					1123	-0.00638661		1123	-0.00430587		1123	0.0126498		1123	-0.00320386		1123	-0.187202		1123	0.00194281
					1124	-0.00391937		1124	-0.000863999		1124	0.00477509		1124	-0.00235643		1124	-0.165023		1124	0.0016635
					1125	-0.00185259		1125	-8.23365e-05		1125	-0.00328793		1125	-0.00225981		1125	-0.148587		1125	0.00118382
					1126	-0.000946266		1126	8.90852e-05		1126	-0.00978926		1126	-0.002334		1126	-0.136715		1126	0.000643808
					1127	0.000259589		1127	-0.000239762		1127	-0.0138689		1127	-0.00311899		1127	-0.125777		1127	-0.000486514
					1128	-4.97151e-05		1128	0.000561094		1128	-0.0149769		1128	-0.00361475		1128	-0.115493		1128	-0.00160712
					1129	-3.38858e-05		1129	0.000671628		1129	-0.0123932		1129	-0.00340129		1129	-0.104123		1129	-0.00137799
					1130	0.000744281		1130	0.00112181		1130	-0.00938791		1130	-0.00269858		1130	-0.0929379		1130	-0.000309094
					1131	-0.000991801		1131	0.000401627		1131	-0.00607098		1131	-0.00136662		1131	-0.0811668		1131	0.000199588
					1132	-0.00258838		1132	-0.000148956		1132	-0.00408243		1132	-0.000525379		1132	-0.0712404		1132	-0.000867569
					1133	-0.000129434		1133	-0.00108996		1133	-0.0031123		1133	-6.48575e-05		1133	-0.0636587		1133	-0.000929492
					1134	-0.000163795		1134	0.000532947		1134	-0.00361059		1134	-0.000105038		1134	-0.0569019		1134	-0.000981678
					1135	-0.000201371		1135	0.000485812		1135	-0.00451732		1135	-7.59048e-05		1135	-0.05107		1135	0.000682641
					1136	-0.000241971		1136	-0.0010357		1136	-0.00542251		1136	-0.000857444		1136	-0.0469331		1136	0.000250595
					1137	-0.00231898		1137	-0.000248597		1137	-0.00578619		1137	-0.00136964		1137	-0.0438015		1137	-0.000901534
					1138	-0.00246868		1138	3.79868e-05		1138	-0.00617836		1138	-0.00131248		1138	-0.0407652		1138	-0.00114372
					1139	-0.00204891		1139	0.00032403		1139	-0.00648905		1139	-0.00117595		1139	-0.0387143		1139	-0.000705956
					1140	-0.000779681		1140	-0.000300485		1140	-0.00579828		1140	-0.000700026		1140	-0.0378289		1140	5.17897e-05
					1141	-0.000831		1141	-0.000785574		1141	-0.00522607		1141	0.0002453		1141	-0.036329		1141	-0.000710469
					1142	-0.00169287		1142	-0.00187125		1142	-0.00498245		1142	0.00138005		1142	-0.0346049		1142	-0.000212713
					1143	-0.00139529		1143	-5.7843e-05		1143	-0.00471743		1143	0.00199423		1143	-0.0337466		1143	-0.000254926
					1144	-0.00142827		1144	-0.000146579		1144	-0.00475105		1144	0.00198787		1144	-0.0332041		1144	7.29115e-05
					1145	-0.00177181		1145	-0.000236876		1145	-0.00378333		1145	0.00185097		1145	-0.0324176		1145	-0.000749185
					1146	-0.00153591		1146	-0.000327304		1146	-0.00256428		1146	0.00188357		1146	-0.0334671		1146	-0.0013312
					1147	-0.000810583		1147	-0.00195898		1147	-0.000723941		1147	0.00232567		1147	-0.0338526		1147	-0.00109311
					1148	-0.00116583		1148	-0.000408477		1148	-0.000282337		1148	0.00221729		1148	-0.0338744		1148	-0.000504916
					1149	-0.00114164		1149	-0.000798652		1149	-2.94944e-05		1149	0.00218845		1149	-0.0342724		1149	-0.00177659
					1150	-0.000898032		1150	-0.000549512		1150	-0.000185441		1150	0.00173917		1150	-0.0333767		1150	-0.00143812
					1151	-0.000685001		1151	-0.000161065		1151	0.00109979		1151	0.000479473		1151	-0.0330173		1151	-0.00049949
					1152	-0.00100255		1152	-0.000383319		1152	0.00108618		1152	0.00172479		1152	-0.0332243		1152	-0.000600692
					1153	-0.000430684		1153	-0.00073628		1153	0.000413692		1153	0.00169341		1153	-0.0330377		1153	-0.00109171
					1154	-0.000639401		1154	-0.00103995		1154	0.00111229		1154	-0.00028198		1154	-0.0312177		1154	-0.000572531
					1155	-0.0012987		1155	-0.000694347		1155	0.000891955		1155	0.000856817		1155	-0.0302242		1155	-0.000463144
					1156	-0.0010586		1156	-0.000559461		1156	-0.00123736		1156	0.00250529		1156	-0.0277472		1156	-0.000253537
					1157	-0.000439076		1157	-0.000215302		1157	-0.00260567		1157	0.00282345		1157	-0.0249069		1157	-0.000153699
					1158	-0.000420146		1158	-0.00040187		1158	-0.00185302		1158	0.00296133		1158	-0.0217331		1158	0.00024638
					1159	-0.000391807		1159	0.000160833		1159	-0.000769452		1159	0.0014013		1159	-0.0197261		1159	0.000666711
					1160	-0.000544061		1160	6.28042e-05		1160	6.5013e-05		1160	0.00134518		1160	-0.0193657		1160	-0.000422696
					1161	-0.000916906		1161	-0.000445955		1161	-0.000179666		1161	0.00240344		1161	-0.019122		1161	-0.000951833
					1162	-0.00104034		1162	-0.000665443		1162	-0.000853525		1162	0.00232038		1162	-0.018375		1162	-0.00153069
					1163	-0.000304375		1163	-0.00014566		1163	-0.0011866		1163	0.00150714		1163	-0.0172847		1163	-0.00156926
					1164	0.000971001		1164	-0.000416603		1164	-0.00163893		1164	0.000513736		1164	-0.0162811		1164	-7.71625e-05
					1165	0.00126578		1165	-0.000328267		1165	-0.00191055		1165	0.000710195		1165	-0.0137343		1165	-0.00108551
					1166	0.00119998		1166	-0.000520651		1166	-0.00161151		1166	0.000516539		1166	-0.0111241		1166	-0.000613172
					1167	0.00105358		1167	-0.000803747		1167	-0.00167184		1167	0.00010279		1167	-0.0108707		1167	-0.00069052
					1168	0.000646585		1168	-0.00101755		1168	-0.00170158		1168	0.000948972		1168	-0.010164		1168	-0.00124755
					1169	0.001069		1169	2.7943e-05		1169	-0.00296078		1169	0.00118511		1169	-0.00872397		1169	-0.000494246
					1170	0.00215083		1170	0.000932744		1170	-0.00298947		1170	0.000431217		1170	-0.0080706		1170	0.000329386
					1171	-0.000284463		1171	0.00116686		1171	-0.0024977		1171	0.000917328		1171	-0.00729387		1171	0.00102335
					1172	-0.000245949		1172	0.0016103		1172	-0.00158552		1172	0.000293463		1172	-0.00535375		1172	0.00154766
					1173	0.00179281		1173	0.00161307		1173	-0.00135296		1173	-0.000140354		1173	-0.00465022		1173	0.000200525
					1174	0.000342298		1174	0.000185184		1174	-0.000700068		1174	0.000685901		1174	-0.00481324		1174	0.00150731
					1175	-0.000528791		1175	-4.33447e-05		1175	-0.0016769		1175	0.000562254		1175	-0.00467277		1175	0.000452657
					1176	-0.00154046		1176	0.000787494		1176	-0.00119348		1176	0.000468728		1176	-0.00498877		1176	-0.000981646
					1177	-0.0020827		1177	0.00103771		1177	-0.00131988		1177	0.00143535		1177	-0.00501118		1177	0.000270372
					1178	-0.00126552		1178	0.000737327		1178	-0.00071614		1178	0.00128214		1178	-0.00501997		1178	0.000283112
					1179	-0.0009089		1179	0.00100635		1179	-0.000502301		1179	0.000569135		1179	-0.00388508		1179	0.000117562
					1180	-0.000602852		1180	-0.000425201		1180	0.000221583		1180	0.000436351		1180	-0.00275644		1180	0.000904672
					1181	-0.000217367		1181	-0.00110731		1181	-6.45358e-05		1181	0.000723817		1181	-0.00275399		1181	0.00175214
					1182	9.75579e-05		1182	-0.000879963		1182	0.000939291		1182	6.15601e-05		1182	-0.00242767		1182	0.00031668
					1183	0.000171926		1183	-6.31379e-05		1183	0.000533013		1183	-2.03939e-05		1183	-0.00238741		1183	0.00032099
					1184	0.000305742		1184	-0.000456817		1184	8.65782e-05		1184	-0.000102018		1184	-0.00256314		1184	0.000986637
					1185	-0.000650991		1185	0.000859019		1185	-0.000360066		1185	0.000696716		1185	-0.00263477		1185	0.000805501
					1186	0.000101732		1186	0.00093439		1186	-0.000206972		1186	-4.41654e-05		1186	-0.00145221		1186	0.000694709
					1187	0.000933915		1187	0.000619319		1187	-0.000874194		1187	0.000275366		1187	-0.0008254		1187	0.000744259
					1188	0.000775562		1188	0.000203826		1188	0.000158213		1188	-0.000474663		1188	-0.000554229		1188	0.00112415
					1189	0.000226678		1189	0.000947936		1189	0.000420195		1189	-0.000474222		1189	-0.000578609		1189	0.00149437
					1190	0.000857269		1190	0.000831672		1190	0.000931695		1190	-0.00144328		1190	-0.00127844		1190	0.00109491
					1191	0.000557339		1191	0.000985059		1191	0.000352656		1191	-0.00122182		1191	-0.00171362		1191	0.000905785
					1192	-0.000233107		1192	0.00102812		1192	0.000373023		1192	-0.0012998		1192	-0.000724049		1192	0.000776974
					1193	-0.000114062		1193	0.00112089		1193	-0.000277265		1193	-0.0010072		1193	0.000600392		1193	0.000308474
					1194	0.000764479		1194	0.00120338		1194	6.17363e-05		1194	-0.000453981		1194	0.00116981		1194	-1.97216e-05
					1195	0.00119252		1195	6.56303e-05		1195	-0.000150034		1195	0.00044988		1195	0.00243434		1195	-0.000407619
					1196	0.00138007		1196	-0.000192333		1196	0.000847363		1196	-0.000655586		1196	0.00268408		1196	-0.000445227
					1197	0.00158713		1197	-0.00077048		1197	0.00161387		1197	-0.00145035		1197	0.00126917		1197	-0.000982553
					1198	0.00108372		1198	-0.000158782		1198	0.00195942		1198	-0.00102437		1198	-0.000350264		1198	-0.00167961
					1199	0.000359832		1199	-0.000517207		1199	0.00209396		1199	-3.39976e-05		1199	-0.00115409		1199	-0.00143639
					1200	-0.000584522		1200	-0.000165723		1200	0.00210741		1200	-0.0018401		1200	-0.00256216		1200	-0.000602926
					1201	-0.00148934		1201	0.000455703		1201	0.00114973		1201	-0.000491741		1201	-0.00426433		1201	0.000200786
					1202	-0.0011546		1202	0.0011871		1202	-0.000449164		1202	0.00120748		1202	0.000472545		1202	0.000374732
					1203	-0.00142031		1203	0.000588516		1203	-0.00122933		1203	0.00142759		1203	0.000493841		1203	0.0016189
					1204	-0.00209645		1204	0.000449972		1204	-0.000750828		1204	0.000808629		1204	0.000507736		1204	0.00114328
					1205	-0.00191303		1205	0.00052151		1205	-0.000483732		1205	0.00088062		1205	0.000514838		1205	0.000487865
					1206	-0.00178002		1206	-0.000196835		1206	-0.000418107		1206	0.000653599		1206	0.000515726		1206	-0.000157365
					1207	0.000200288		1207	-0.00107502		1207	0.00018598		1207	-0.000802401		1207	-0.00390522		1207	-0.00034242
					1208	-0.00192525		1208	-0.000433017		1208	0.000878461		1208	-0.000587347		1208	-0.00298185		1208	-0.000507314
					1209	-0.00140346		1209	-0.000880777		1209	0.000429266		1209	0.000388795		1209	-0.0021413		1209	-0.00086206
					1210	-0.000782051		1210	-0.000628262		1210	0.000308325		1210	4.60583e-05		1210	-0.0016534		1210	-0.000586673
					1211	0.000828975		1211	-0.00101543		1211	0.000385568		1211	0.000164476		1211	-0.00121798		1211	-0.000361166
					1212	0.000559631		1212	-0.000512246		1212	0.000270924		1212	0.000614084		1212	0.000405165		1212	-0.000385557
					1213	0.000499928		1213	-0.00146866		1213	-0.00061568		1213	0.000474915		1213	0.00193622		1213	-1.98593e-05
					1214	0.000819874		1214	-0.000824631		1214	-0.000744315		1214	0.000597004		1214	0.00244536		1214	0.00039591
					1215	0.00058948		1215	-0.00105011		1215	-0.000925055		1215	0.000780386		1215	0.00238281		1215	0.000781734
					1216	-0.00116124		1216	-9.50653e-05		1216	-0.000637975		1216	0.000315097		1216	0.00173876		1216	2.7595e-05
					1217	-0.000152292		1217	0.000320563		1217	-0.000153148		1217	0.000871172		1217	0.000373409		1217	0.000543477
					1218	0.000686352		1218	0.000906816		1218	0.00054935		1218	0.00150865		1218	-0.000173026		1218	0.00014936
					1219	0.000264695		1219	0.000953742		1219	0.000579442		1219	0.000887556		1219	0.00113967		1219	-0.000524773
					1220	-0.000577251		1220	0.00152139		1220	0.000297052		1220	0.000947937		1220	0.00112171		1220	-0.00168894
					1221	-0.000169476		1221	0.00165981		1221	-0.000467897		1221	0.000929827		1221	0.00138331		1221	-0.00165317
					1222	-0.00105197		1222	0.000749046		1222	-0.000705484		1222	0.000913261		1222	0.00158471		1222	-0.000151094
					1223	-0.00173472		1223	-0.000240844		1223	-0.00163579		1223	0.00154828		1223	0.000256131		1223	-0.000164332
					1224	-0.00100771		1224	-0.000329811		1224	-0.00166889		1224	-2.3874e-05		1224	-0.000942194		1224	-0.00114637
					1225	0.000879061		1225	-0.000227802		1225	-0.00112486		1225	-1.65993e-05		1225	-0.00122003		1225	7.89751e-05
					1226	0.000895611		1226	-0.000174763		1226	0.000306204		1226	-9.20708e-06		1226	-0.00121712		1226	0.000514164
					1227	0.00104195		1227	0.000929358		1227	0.000324231		1227	-1.75066e-06		1227	-0.000593242		1227	0.00104917
					1228	0.0010781		1228	-0.000476711		1228	0.00109914		1228	0.000938402		1228	-0.000658132		1228	0.00125397
					1229	0.000444053		1229	-0.000516744		1229	0.00165084		1229	-0.000306299		1229	-0.00039154		1229	0.00137854
					1230	-0.000240162		1230	0.00123878		1230	0.00148925		1230	-0.000699151		1230	0.000646791		1230	0.00141286
					1231	0.000235462		1231	0.000427789		1231	-0.000305706		1231	-0.00127012		1231	0.000767122		1231	0.000316902
					1232	5.09397e-05		1232	-0.000251831		1232	0.000185878		1232	-0.00104916		1232	-0.000200281		1232	-0.000119359
					1233	0.000136283		1233	-0.000850027		1233	0.000103918		1233	-0.000576229		1233	0.00062485		1233	-0.000115947
					1234	0.000871505		1234	-0.000856737		1234	-0.000251672		1234	8.70336e-06		1234	0.000392789		1234	-0.00176289
					1235	0.00036662		1235	-0.0009919		1235	0.00031902		1235	-8.43181e-05		1235	0.000413813		1235	-0.000247957
					1236	0.000741641		1236	-0.000265456		1236	0.00205591		1236	-8.52533e-05		1236	0.000458203		1236	-0.00120794
					1237	0.00108658		1237	-0.000397342		1237	0.0014789		1237	-0.000454062		1237	-0.000253756		1237	-0.0010261
					1238	0.000851458		1238	-0.000657495		1238	0.000697911		1238	-0.000480703		1238	-0.000681776		1238	-0.00109472
					1239	0.000346281		1239	-0.00102585		1239	0.000362848		1239	-0.00126513		1239	2.44379e-05		1239	-9.38301e-05
					1240	0.000841067		1240	-0.000832343		1240	-0.000106379		1240	7.47515e-05		1240	-0.000184819		1240	0.000406541
					1241	0.000685831		1241	-0.00144691		1241	-0.000959861		1241	7.68889e-05		1241	0.000250756		1241	0.000586365
					1242	0.00108059		1242	-0.00160948		1242	-0.00100769		1242	7.81581e-05		1242	0.00134147		1242	0.000675612
					1243	0.00102535		1243	-0.00139999		1243	-0.00129996		1243	7.84881e-05		1243	0.00121762		1243	0.00108425
					1244	0.000280134		1244	-0.000898368		1244	-0.00173676		1244	-0.00132271		1244	5.95323e-05		1244	0.000482255
					1245	-0.000315043		1245	-0.000934549		1245	-0.0011382		1245	0.000396993		1245	-0.000712482		1245	7.95899e-05
					1246	-0.000150168		1246	-0.00139846		1246	-0.00074435		1246	0.000819195		1246	-0.0007281		1246	-0.000413776
					1247	-0.000845223		1247	-0.00131003		1247	-0.000535322		1247	0.000713945		1247	-0.001267		1247	-0.000937873
					1248	-0.000640194		1248	-0.0014992		1248	0.000358791		1248	0.000121284		1248	-0.00240885		1248	-0.00131273
					1249	-0.000725064		1249	-0.000875879		1249	0.000947892		1249	-2.87422e-05		1249	-0.00232332		1249	-0.000948395
					1250	-0.000879816		1250	-0.000570003		1250	8.18842e-05		1250	-0.00107609		1250	-0.00149007		1250	-0.000134885
					1251	-0.00111443		1251	0.000338502		1251	0.000180669		1251	-0.00159072		1251	-0.00149876		1251	-0.00024224
					1252	-0.000358904		1252	0.000899711		1252	7.41462e-05		1252	-0.000912576		1252	-0.000699053		1252	0.000599506
					1253	-0.000573205		1253	0.0015237		1253	0.000282217		1253	-0.000861624		1253	0.00151941		1253	-0.00107968
					1254	0.000482678		1254	0.00114054		1254	0.000364782		1254	-0.00102782		1254	0.00298697		1254	-0.000409841
					1255	0.000518763		1255	0.00135032		1255	0.000671738		1255	-0.000631106		1255	0.003324		1255	-0.000301005
					1256	6.50663e-05		1256	0.00121311		1256	0.000482984		1256	0.000128551		1256	0.00217085		1256	0.00053679
					1257	-0.000118394		1257	0.00106899		1257	0.000208418		1257	0.000591201		1257	0.000557885		1257	0.000773507
					1258	-0.000251599		1258	-3.19568e-05		1258	0.000267935		1258	0.00108689		1258	-0.000664527		1258	0.000308054
					1259	-0.000674532		1259	0.000400343		1259	-0.000168566		1259	0.00109566		1259	-0.00104601		1259	0.00172356
					1260	3.28255e-05		1260	0.000585974		1260	0.000118808		1260	0.000607569		1260	-0.00118619		1260	0.00064681
					1261	0.000490492		1261	0.000615019		1261	-0.00140005		1261	0.000932653		1261	-0.000394692		1261	-0.000261165
					1262	0.000863794		1262	-0.000336184		1262	6.75501e-05		1262	-0.000724274		1262	0.000344362		1262	-0.00172166
					1263	0.000653102		1263	-4.87109e-05		1263	-0.000382306		1263	-0.00120688		1263	-0.0100251		1263	-0.00274155
					1264	-0.00196873		1264	-0.000930936		1264	-0.00172123		1264	-0.00352782		1264	-0.049695		1264	-0.00615129
					1265	-0.00531168		1265	-0.00355288		1265	-0.00228921		1265	-0.00638709		1265	-0.112885		1265	-0.00979083
					1266	-0.0106857		1266	-0.00684456		1266	-0.000596235		1266	-0.0101447		1266	-0.189346		1266	-0.0145001
					1267	-0.0163309		1267	-0.010956		1267	0.00083769		1267	-0.0127907		1267	-0.264236		1267	-0.0190592
					1268	-0.0197271		1268	-0.0138772		1268	0.00466258		1268	-0.013965		1268	-0.309797		1268	-0.0206279
					1269	-0.0193744		1269	-0.0158683		1269	0.0100084		1269	-0.0128177		1269	-0.311188		1269	-0.0171162
					1270	-0.0179927		1270	-0.0156791		1270	0.0137953		1270	-0.0109688		1270	-0.280589		1270	-0.0130842
					1271	-0.0148021		1271	-0.0136798		1271	0.015103		1271	-0.00826828		1271	-0.23329		1271	-0.00803169
					1272	-0.00948246		1272	-0.0099503		1272	0.0140018		1272	-0.00635613		1272	-0.186791		1272	-0.00326872
					1273	-0.00443383		1273	-0.00637071		1273	0.00946156		1273	-0.00578239		1273	-0.159521		1273	-0.000725236
					1274	-0.00216619		1274	-0.00369101		1274	0.00306228		1274	-0.00542706		1274	-0.146511		1274	-0.00231121
					1275	-0.000299513		1275	-0.00146122		1275	-0.00384601		1275	-0.00498016		1275	-0.138991		1275	-0.0030566
					1276	0.00250621		1276	-0.000831361		1276	-0.00874333		1276	-0.00502169		1276	-0.132661		1276	-0.00164753
					1277	0.003441		1277	-0.000801446		1277	-0.0129097		1277	-0.00453167		1277	-0.12362		1277	-0.00168626
					1278	0.00324487		1278	-0.000601494		1278	-0.014415		1278	-0.00409012		1278	-0.112369		1278	-0.00172161
					1279	0.00350784		1279	-0.000971521		1279	-0.0124994		1279	-0.00401703		1279	-0.101597		1279	-0.00317174
					1280	0.00134044		1280	-0.000971543		1280	-0.00954281		1280	-0.00344243		1280	-0.0922247		1280	-0.00237377
					1281	0.00183112		1281	-0.000651576		1281	-0.00678524		1281	-0.00261634		1281	-0.0836617		1281	-0.000435045
					1282	0.000671466		1282	-0.000311637		1282	-0.00401671		1282	-0.00191876		1282	-0.0764479		1282	-0.000165539
					1283	-0.000849027		1283	-0.00023174		1283	-0.00250722		1283	-0.00172971		1283	-0.0696035		1283	-0.000835226
					1284	-0.000870344		1284	0.0007081		1284	-0.00219677		1284	-0.00122922		1284	-0.0641283		1284	-0.00107409
					1285	-0.00174247		1285	0.000737867		1285	-0.00348537		1285	-0.00110729		1285	-0.0578723		1285	-0.000792093
					1286	-0.00103539		1286	0.00122755		1286	-0.00437302		1286	-0.00152394		1286	-0.0508654		1286	-0.00136923
					1287	-0.00111908		1287	0.00124712		1287	-0.00617974		1287	-0.00321919		1287	-0.0441277		1287	-0.00175548
					1288	-0.00136354		1288	0.00112659		1288	-0.00654552		1288	-0.00286306		1288	-0.038679		1288	-0.00152082
					1289	-0.00234873		1289	0.000665922		1289	-0.00709039		1289	-0.00277556		1289	-0.0331094		1289	-0.00368523
					1290	-0.000541174		1290	0.000335114		1290	-0.00605434		1290	-0.00269673		1290	-0.0284388		1290	-0.00137017
					1291	-0.000626982		1291	0.000174151		1291	-0.00611739		1291	-0.00187657		1291	-0.0246072		1291	-0.00128079
					1292	-0.00069827		1292	0.00060302		1292	-0.00525954		1292	-0.000245107		1292	-0.0233745		1292	-0.00314276
					1293	-0.00213664		1293	0.000491708		1293	-0.00516082		1293	-0.000872364		1293	-0.0234907		1293	-0.00220332
					1294	-0.000675314		1294	0.0010202		1294	-0.00433122		1294	-0.000688361		1294	-0.0229258		1294	-0.000312887
					1295	0.000195367		1295	0.000408495		1295	-0.00407077		1295	-0.00121312		1295	-0.0242998		1295	0.000178549
					1296	1.54181e-05		1296	-8.34296e-05		1296	-0.00260947		1296	-0.00283666		1296	-0.0272426		1296	-0.000339001
					1297	0.000834857		1297	-0.000295582		1297	-0.00184734		1297	-0.000879216		1297	-0.0277142		1297	-0.000605531
					1298	0.000893699		1298	-0.000497972		1298	-0.0010444		1298	-0.000767348		1298	-0.0280347		1298	-0.00113103
					1299	-8.8038e-05		1299	-0.00118061		1299	-0.00185065		1299	-0.000660555		1299	-0.0294139		1299	-0.000945503
					1300	-0.00125034		1300	-3.50845e-06		1300	-0.00149612		1300	-0.000549175		1300	-0.0288018		1300	-0.000268935
					1301	-0.00134318		1301	0.000653324		1301	-0.00192082		1301	0.00033299		1301	-0.0272585		1301	0.000288673
					1302	-0.00122656		1302	-0.000250122		1302	-0.00137477		1302	-3.37785e-05		1302	-0.0265039		1302	4.73229e-05
					1303	-0.00110045		1303	-0.000523856		1303	-0.000687978		1303	0.000110492		1303	-0.0250281		1303	-0.000762984
					1304	-0.000864835		1304	-0.000767888		1304	0.000799528		1304	-0.000814227		1304	-0.0241509		1304	-0.000702248
					1305	-0.0007197		1305	-0.00140223		1305	0.00137773		1305	-0.000156298		1305	-0.0242225		1305	0.000629529
					1306	-0.000585027		1306	-0.000361818		1306	0.00143661		1306	-0.00190074		1306	-0.0246527		1306	0.000662344
					1307	-0.0011408		1307	-0.00128186		1307	7.61496e-05		1307	-0.000612595		1307	-0.0241116		1307	0.000656194
					1308	-0.000867		1308	-0.000877164		1308	-0.00135367		1308	0.000386448		1308	-0.0237492		1308	-0.000558927
					1309	0.000166388		1309	-5.28101e-05		1309	-0.00182288		1309	0.000586357		1309	-0.0215454		1309	0.000126976
					1310	0.00108938		1310	-0.000168803		1310	-0.0016215		1310	0.000707102		1310	-0.0193003		1310	-0.000856106
					1311	-0.000284008		1311	0.000174852		1311	-0.00109955		1311	0.00025865		1311	-0.0176439		1311	-0.00014818
					1312	0.00173425		1312	-0.000731853		1312	9.29552e-05		1312	0.000410971		1312	-0.0171062		1312	-0.000399257
					1313	0.000966165		1313	-0.000648925		1313	0.00128598		1313	-0.000335968		1313	-0.0170871		1313	0.00130065
					1314	-0.000312248		1314	-0.000516369		1314	0.0011295		1314	-4.22009e-05		1314	-0.0170968		1314	0.000791538
					1315	-0.000520971		1315	0.000495809		1315	-0.000846507		1315	0.00069224		1315	-0.0163551		1315	0.000103385
					1316	-0.00134998		1316	0.000217602		1316	-0.00127207		1316	0.000207665		1316	-0.0142621		1316	-0.00131382
					1317	-0.00105927		1317	0.000259007		1317	-0.000647209		1317	0.001313		1317	-0.0126878		1317	-0.000410097
					1318	-0.000398817		1318	0.000200018		1318	-0.000861958		1318	0.000221764		1318	-0.0109223		1318	0.000504544
					1319	9.1399e-05		1319	-2.93706e-05		1319	-0.000606344		1319	0.00157604		1319	-0.00961546		1319	0.000670081
					1320	0.000241393		1320	-0.000249162		1320	0.000759604		1320	0.000683327		1320	-0.00955739		1320	0.0011365
					1321	1.11823e-05		1321	0.00020064		1321	-0.000334142		1321	-0.00028893		1321	-0.00961808		1321	0.00106377
					1322	0.000470785		1322	0.000840031		1322	-0.000937612		1322	-0.00106076		1322	-0.00922756		1322	0.000131878
					1323	-0.000349783		1323	0.000389008		1323	-0.000960838		1323	0.000218694		1323	-0.00865584		1323	-0.0013092
					1324	-0.000650502		1324	-0.000582433		1324	-0.000503852		1324	-0.00052332		1324	-0.00884294		1324	-0.00182949
					1325	-0.000301355		1325	-0.000964294		1325	-0.000906684		1325	-0.000344118		1325	-0.00824889		1325	-0.00193901
					1326	-0.000462325		1326	-0.00106658		1326	0.000400633		1326	-9.46495e-05		1326	-0.00735372		1326	-0.00104779
					1327	-0.000853394		1327	-0.000859287		1327	0.00121806		1327	0.000625045		1327	-0.00684744		1327	-0.000265857
					1328	-0.000644544		1328	-0.000532423		1328	0.00113558		1328	0.000854925		1328	-0.0066001		1328	0.00123676
					1329	-3.57571e-05		1329	0.000504013		1329	0.00103313		1329	0.000594948		1329	-0.00627171		1329	0.00147003
					1330	-0.000787016		1330	-0.000899982		1330	0.0010307		1330	0.000695073		1330	-0.00623231		1330	0.00149392
					1331	0.000351697		1331	-0.00123441		1331	0.00121825		1331	0.000295258		1331	-0.00752194		1331	0.0016684
					1332	0.0012304		1332	-0.00105926		1332	0.000615728		1332	-0.000194542		1332	-0.00788062		1332	0.000843443
					1333	0.00201911		1333	-0.000464555		1333	0.00043311		1333	-0.00096437		1333	-0.00777839		1333	-0.00012099
					1334	0.00157785		1334	-3.02773e-05		1334	-0.000399645		1334	-0.000934269		1334	-0.00660529		1334	-0.000164934
					1335	0.00185663		1335	0.000259374		1335	-0.000702576		1335	-0.00120429		1335	-0.00516137		1335	0.000231574
					1336	0.00107547		1336	0.00179698		1336	-0.00136572		1336	-0.000264465		1336	-0.00352666		1336	-0.000501503
					1337	0.000344399		1337	0.000959965		1337	-0.00151912		1337	0.00109515		1337	-0.0031012		1337	0.000435796
					1338	0.000103422		1338	0.00108252		1338	-0.00103282		1338	7.81996e-05		1338	-0.00280505		1338	-0.000196569
					1339	0.000942561		1339	0.000534641		1339	-0.000246854		1339	0.00186356		1339	-0.00316823		1339	-0.000108639
					1340	0.00112183		1340	0.000226338		1340	0.000718733		1340	0.00163226		1340	-0.00320082		1340	-0.000190457
					1341	0.000921261		1341	0.00112761		1341	0.0010939		1341	0.00125057		1341	-0.00247284		1341	0.000587935
					1342	0.00172086		1342	0.000357161		1342	0.0018386		1342	0.000628431		1342	-0.00185436		1342	0.00038649
					1343	0.000509685		1343	0.00138889		1343	0.00103279		1343	0.000795795		1343	-0.000305426		1343	0.00106516
					1344	0.000495343		1344	0.0014189		1344	0.00044643		1344	0.000802612		1344	-0.000396093		1344	0.000503909
					1345	0.000479253		1345	0.000718497		1345	-0.00044053		1345	0.000878832		1345	-0.000616416		1345	5.26772e-05
					1346	0.000461502		1346	0.000997683		1346	-0.000618134		1346	0.000614404		1346	-0.00141645		1346	-0.000198581
					1347	0.00044218		1347	0.000876462		1347	-0.00169643		1347	0.000349277		1347	-0.00106627		1347	0.000430084
					1348	0.000483073		1348	0.000644839		1348	-0.00147546		1348	-9.66029e-05		1348	-0.00193591		1348	0.000788621
					1349	0.000334385		1349	0.00119282		1349	-0.00185528		1349	-0.000833287		1349	-0.000525456		1349	0.00108698
					1350	-0.000733983		1350	0.0010104		1350	-0.000875936		1350	-0.00124083		1350	0.000895039		1350	0.000835097
					1351	-0.00110201		1351	0.000557594		1351	-0.00127747		1351	-0.000629283		1351	0.00226551		1351	-7.70733e-05
					1352	-0.000849689		1352	7.44045e-05		1352	-0.000929944		1352	-0.000768704		1352	0.00257588		1352	-0.000959591
					1353	0.000143012		1353	0.000810837		1353	-0.000293398		1353	-0.00128915		1353	0.00297609		1353	-0.00102251
					1354	3.6106e-05		1354	-0.000363103		1354	0.000112112		1354	-0.00104067		1354	0.00343607		1354	-0.000695897
					1355	-0.000450387		1355	7.25901e-05		1355	-0.000243464		1355	-0.000713318		1355	0.00275574		1355	-0.000909804
					1356	-0.000616449		1356	-0.000402076		1356	0.00034982		1356	-0.00140716		1356	0.00193503		1356	-0.000314295
					1357	-0.00101206		1357	-0.000937096		1357	-0.000328088		1357	-0.00067225		1357	0.00235386		1357	-0.000109433
					1358	-0.0011972		1358	0.000241411		1358	8.27575e-05		1358	-0.00138864		1358	0.00264216		1358	-0.00010528
					1359	0.000122058		1359	0.000221388		1359	7.23027e-05		1359	-0.0013164		1359	0.00178985		1359	-0.000591901
					1360	-0.001416		1360	0.000200304		1360	-0.000189508		1360	-0.00101559		1360	0.00125684		1360	-0.000399361
					1361	-0.00139962		1361	-0.00134056		1361	-2.72965e-06		1361	-0.00072625		1361	0.000513063		1361	-0.000397728
					1362	-0.0013127		1362	-0.000247233		1362	0.000122581		1362	-0.000618456		1362	-0.000211575		1362	-0.00123707
					1363	-0.00115521		1363	0.000745788		1363	-0.00120363		1363	0.00190774		1363	0.000102843		1363	-0.00167746
					1364	-0.000657136		1364	0.00115851		1364	-0.00114143		1364	-4.20401e-05		1364	0.00094623		1364	-0.00186895
					1365	0.00022154		1365	9.09452e-05		1365	-0.000390868		1365	0.00155506		1365	0.0030185		1365	-0.000781639
					1366	0.000550838		1366	-0.000586899		1366	-0.00124201		1366	0.00103607		1366	0.00512956		1366	-0.000125582
					1367	0.000820777		1367	-0.000735013		1367	-0.0015249		1367	0.000575232		1367	0.000893847		1367	0.00121914
					1368	0.000201376		1368	-0.00117339		1368	-0.00084962		1368	-0.000397523		1368	0.000821351		1368	0.00144246
					1369	-0.000867345		1369	-0.000532007		1369	-0.000946218		1369	0.000917742		1369	0.00503454		1369	0.0021343
					1370	-0.00152537		1370	0.00103913		1370	-0.00199476		1370	-2.87006e-05		1370	0.00225983		1370	0.000824568
					1371	-0.00194267		1371	-7.26777e-05		1371	-0.000965304		1371	-2.55406e-05		1371	-0.00121658		1371	-8.67969e-05
					1372	-0.00135923		1372	0.00147074		1372	-4.79169e-05		1372	-2.21792e-05		1372	-0.00332477		1372	-0.000929881
					1373	-0.00148504		1373	0.00144124		1373	0.000207339		1373	-1.86431e-05		1373	-0.00527484		1373	-0.00222477
					1374	-0.00109007		1374	-4.84632e-05		1374	0.000310399		1374	0.000902099		1374	-0.00607691		1374	-0.00234153
					1375	-0.0011143		1375	-0.000778343		1375	0.000481198		1375	-0.000265888		1375	0.000190085		1375	-0.00134026
					1376	-0.00105772		1376	-0.000498392		1376	-0.000170329		1376	0.000613681		1376	9.05455e-05		1376	-0.00090104
					1377	-0.0015103		1377	-0.00107859		1377	0.000275751		1377	-0.000169263		1377	-9.20714e-06		1377	-0.000183954
					1378	-0.00092202		1378	-0.000448941		1378	0.000429373		1378	-0.00136479		1378	-0.000108448		1378	0.00172091
					1379	-0.000272868		1379	6.05851e-05		1379	0.000160467		1379	-0.00119296		1379	-0.000206444		1379	2.68216e-06
					1380	0.000457179		1380	0.000539995		1380	0.000768966		1380	0.000486139		1380	-0.000302459		1380	0.00126362
					1381	0.000158141		1381	0.000559305		1381	0.000424801		1381	-0.000247551		1381	-0.00521617		1381	0.00121129
					1382	0.000290038		1382	-0.000310445		1382	0.000197903		1382	-1.41044e-05		1382	-0.00274808		1382	0.00175638
					1383	0.000212891		1383	0.000497676		1383	0.000108201		1383	0.000546406		1383	-0.000482992		1383	0.0018688
					1384	4.67179e-05		1384	-0.000343232		1384	0.00111562		1384	0.000893908		1384	0.00166898		1384	0.00207845
					1385	-0.00013846		1385	-0.000844183		1385	0.0012401		1385	-5.16716e-05		1385	0.00210772		1385	0.00186524
					1386	-6.26232e-05		1386	-0.00188516		1386	0.00214156		1386	0.000529594		1386	0.0017331		1386	0.000719072
					1387	0.000504249		1387	-0.000357076		1387	0.00179993		1387	0.000907629		1387	0.000714995		1387	-0.00144015
					1388	0.000882176		1388	-0.000967134		1388	0.00129513		1388	3.23606e-05		1388	-0.00034672		1388	3.50794e-05
					1389	0.000711178		1389	0.000361903		1389	0.000517097		1389	-9.62878e-05		1389	-0.000732173		1389	3.75014e-05
					1390	-0.000228725		1390	-0.000109023		1390	0.000175749		1390	0.000751608		1390	-1.49419e-06		1390	-0.00183712
					1391	0.000202488		1391	-2.9894e-05		1391	-0.000498989		1391	0.000545972		1391	0.00148519		1391	-0.00115955
					1392	9.48367e-05		1392	-0.000280693		1392	-3.71913e-05		1392	0.000736726		1392	0.00275773		1392	-0.00110554
					1393	0.000178342		1393	-0.0011714		1393	-5.89356e-05		1393	0.00142379		1393	0.00229602		1393	-0.000725191
					1394	0.000383023		1394	-0.00176201		1394	-0.000174299		1394	0.000617096		1394	0.0011399		1394	-0.000788607
					1395	0.000978901		1395	-0.00147248		1395	6.64042e-06		1395	-0.000923446		1395	-0.000370763		1395	-0.0010459
					1396	0.000805996		1396	-0.00120282		1396	0.000693804		1396	-0.00146791		1396	-0.0023661		1396	-0.000377167
					1397	0.000174329		1397	-0.000352987		1397	0.000977112		1397	-0.00122638		1397	-0.00600626		1397	0.00139747
					1398	-0.00113608		1398	0.00113702		1398	0.00179648		1398	-0.000358932		1398	-0.00709139		1398	0.00125791
					1399	-0.00101521		1399	0.000447236		1399	0.00242184		1399	0.000344351		1399	-0.000714369		1399	0.00143404
					1400	-0.000613041		1400	0.000447668		1400	0.0013031		1400	0.000573388		1400	-0.000604138		1400	0.00142575
					1401	0.000350448		1401	0.00128834		1401	0.00092018		1401	0.0011781		1401	-0.00531798		1401	0.00112292
					1402	0.00112528		1402	0.00137927		1402	0.000762997		1402	0.000478393		1402	-0.00194441		1402	6.54344e-05
					1403	0.00199147		1403	4.04887e-05		1403	0.000201469		1403	-0.000435805		1403	0.000883451		1403	0.000343185
					1404	0.00180904		1404	0.000852006		1404	3.55112e-05		1404	-0.00111458		1404	0.00272546		1404	-0.000313949
					1405	0.00146802		1405	0.00127385		1405	0.000475039		1405	-0.00132802		1405	0.00432147		1405	-0.00153608
					1406	0.000508415		1406	0.00131603		1406	0.000389968		1406	-0.00151621		1406	0.00377131		1406	-0.00154334
					1407	-0.000549742		1407	0.000178582		1407	-0.000159788		1407	-0.000969229		1407	0.00243483		1407	-0.000925842
					1408	-0.000346434		1408	0.000241521		1408	-0.000824317		1408	0.000192831		1408	0.00132188		1408	-0.000413706
					1409	-0.00124164		1409	0.000214871		1409	-0.0025337		1409	0.00115989		1409	0.00075228		1409	0.000612944
					1410	-0.00102534		1410	-0.000131345		1410	-0.00311804		1410	0.000911845		1410	-0.000394119		1410	0.000663983
					1411	-7.75087e-05		1411	0.000746543		1411	-0.00340741		1411	0.000198623		1411	-0.000267484		1411	-0.000340714
					1412	0.00230101		1412	-7.80567e-05		1412	-0.00125219		1412	0.000345484		1412	0.000458784		1412	0.000526716
					1413	0.00271288		1413	0.000646239		1413	-0.000788002		1413	-0.00153276		1413	-0.00364606		1413	-0.00112362
					1414	0.00162397		1414	0.000319535		1414	-4.07626e-06		1414	-0.00411146		1414	-0.0345714		1414	-0.0048243
					1415	-0.00238566		1415	-0.00130819		1415	-0.000510395		1415	-0.00640065		1415	-0.0893173		1415	-0.00855529
					1416	-0.00795599		1416	-0.00526695		1416	-8.69393e-05		1416	-0.00920038		1416	-0.160354		1416	-0.0125965
					1417	-0.013827		1417	-0.0103368		1417	0.00310631		1417	-0.0121007		1417	-0.235551		1417	-0.0177681
					1418	-0.0188086		1418	-0.0161077		1418	0.00758937		1418	-0.0133417		1418	-0.28606		1418	-0.0193397
					1419	-0.0198408		1419	-0.0189496		1419	0.0130923		1419	-0.0126233		1419	-0.29425		1419	-0.0174116
					1420	-0.0178236		1420	-0.0184227		1420	0.018475		1420	-0.00991559		1420	-0.269451		1420	-0.0131536
					1421	-0.0140769		1421	-0.0145169		1421	0.0210476		1421	-0.00696867		1421	-0.226234		1421	-0.0081857
					1422	-0.00994062		1422	-0.00992219		1422	0.0192301		1422	-0.00484254		1422	-0.179548		1422	-0.00291786
					1423	-0.00459486		1423	-0.00479865		1423	0.0146625		1423	-0.00353724		1423	-0.151784		1423	3.99484e-05
					1424	-0.000979514		1424	-0.00194626		1424	0.00829483		1424	-0.0043128		1424	-0.138952		1424	0.00142775
					1425	0.00142544		1425	2.49604e-05		1425	0.000777087		1425	-0.00508926		1425	-0.133211		1425	0.00108557
					1426	0.00298003		1426	0.00145501		1426	-0.0047907		1426	-0.00464665		1426	-0.128403		1426	-8.65501e-05
					1427	0.00451429		1427	0.000883871		1427	-0.00348719		1427	-0.00480501		1427	-0.121327		1427	-0.000508591
					1428	0.00415825		1428	0.00041154		1428	-0.00552754		1428	-0.00467437		1428	-0.112713		1428	-0.000340523
					1429	0.00415195		1429	0.00146801		1429	-0.0105142		1429	-0.00212476		1429	-0.102772		1429	-0.000132319
					1430	0.00264946		1430	0.000763263		1430	-0.00922201		1430	-0.0012362		1430	-0.0920835		1430	0.000656045
					1431	0.00387866		1431	-0.000442696		1431	-0.00663979		1431	-0.00161873		1431	-0.0812974		1431	0.00177459
					1432	0.00292173		1432	-0.000749879		1432	-0.00406752		1432	-0.00152237		1432	-0.072174		1432	0.00209335
					1433	0.00119464		1433	-0.00105829		1433	-0.00659145		1433	-0.000277151		1433	-0.0646834		1433	0.00146235
					1434	-0.000162563		1434	-0.000127343		1434	-0.00239278		1434	-0.000763094		1434	-0.0578556		1434	0.000701594
					1435	0.000878564		1435	-0.00105881		1435	-0.00129028		1435	-0.000950223		1435	-0.0524209		1435	0.000441118
					1436	0.000628914		1436	0.000259075		1436	-0.00159768		1436	-0.00148856		1436	-0.0484892		1436	-0.000419061
					1437	0.000410812		1437	-0.000292109		1437	-0.00244495		1437	-0.000978127		1437	-0.0444406		1437	-0.00146892
					1438	-0.000342066		1438	-0.000350632		1438	-0.00398209		1438	-0.000468943		1438	-0.0400752		1438	-0.00285845
					1439	0.00054052		1439	-0.000411968		1439	-0.00408909		1439	-0.000371028		1439	-0.0374631		1439	-0.00322762
					1440	0.000543143		1440	0.00105819		1440	-0.00438592		1440	0.000345602		1440	-0.0350644		1440	-0.00397641
					1441	-7.41716e-05		1441	-7.01417e-05		1441	-0.00447259		1441	-0.000774468		1441	-0.032609		1441	-0.00335482
					1442	-0.0004114		1442	-0.00124971		1442	-0.00402907		1442	0.000884941		1442	-0.0306671		1442	-0.00278282
					1443	-0.000618518		1443	-0.00057052		1443	-0.00259535		1443	-0.000772379		1443	-0.0299987		1443	-0.00212041
					1444	-0.0010955		1444	0.000427436		1444	-0.00164142		1444	-0.00190104		1444	-0.0301339		1444	-0.00215755
					1445	-0.000892328		1445	6.41604e-05		1445	-0.000787273		1445	-0.000232404		1445	-0.0301827		1445	-0.00184425
					1446	-0.000968973		1446	0.000259658		1446	-0.000702894		1446	-0.000115809		1446	-0.0304452		1446	-0.00224049
					1447	-0.00116542		1447	-0.000929272		1447	-0.000188273		1447	-0.00167521		1447	-0.0303814		1447	-0.00270626
					1448	-0.000681633		1448	0.000696992		1448	-0.0010634		1448	-0.000439354		1448	-0.0298913		1448	-0.00224155
					1449	-0.000487603		1449	0.000408842		1449	-0.00139826		1449	0.000235111		1449	-0.0284951		1449	-0.00231634
					1450	-0.000293306		1450	-0.000550509		1450	-0.00174284		1450	0.00042818		1450	-0.0274526		1450	-0.00132063
					1451	-0.00023872		1451	-0.000741054		1451	-0.00200715		1451	0.000259849		1451	-0.0271839		1451	0.000325598
					1452	3.61749e-05		1452	-0.00204278		1452	-0.00228115		1452	3.01128e-05		1452	-0.0271292		1452	-0.00236409
					1453	-0.000138602		1453	-0.00165569		1453	-0.00155486		1453	-0.000411029		1453	-0.0257483		1453	-0.00230563
					1454	0.00034697		1454	-0.00191975		1454	-0.00100825		1454	-0.000823579		1454	-0.0235113		1454	0.000317412
					1455	0.000712909		1455	-0.000394973		1455	-0.000951316		1455	-0.000987535		1455	-0.0223082		1455	-0.00294425
					1456	-0.000240595		1456	-0.000801333		1456	-0.00109405		1456	-0.0010529		1456	-0.0215991		1456	-0.00206993
					1457	-0.000203715		1457	-0.000738821		1457	-0.000226453		1457	-0.00112966		1457	-0.0217439		1457	-0.001976
					1458	0.000613111		1458	-0.00167742		1458	0.000201495		1458	-0.00106783		1458	-0.0226526		1458	-0.00187656
					1459	-8.93012e-05		1459	-0.00177713		1459	-0.000790202		1459	0.00011261		1459	-0.0237852		1459	-0.00177275
					1460	-8.12578e-05		1460	-0.00257791		1460	-0.00112154		1460	0.00153166		1460	-0.0238218		1460	-0.00490435
					1461	-0.000152743		1461	-0.00178977		1461	-0.0010725		1461	0.00228933		1461	-0.0229823		1461	-0.00296272
					1462	-0.00049374		1462	-0.00162268		1462	-0.00117309		1462	0.00056655		1462	-0.0206567		1462	-0.00146053
					1463	0.000195766		1463	-0.00126662		1463	-0.00118329		1463	0.000559909		1463	-0.017825		1463	-0.000987794
					1464	0.00077579		1464	-0.00124158		1464	-0.0010531		1464	0.00247413		1464	-0.0159671		1464	-0.000954506
					1465	0.000496347		1465	-0.00089754		1465	-0.00111251		1465	0.000538889		1465	-0.0144531		1465	-0.00105067
					1466	6.74511e-05		1466	-0.00112448		1466	-1.15266e-05		1466	0.00052522		1466	-0.013303		1466	-0.000446294
					1467	-6.08844e-05		1467	-0.000802374		1467	0.00025987		1467	0.00239687		1467	-0.0131666		1467	0.000648623
					1468	0.000721354		1468	-0.000531208		1468	-0.000978319		1468	0.00159517		1468	-0.013314		1468	0.00116407
					1469	0.00102418		1469	-0.000340958		1469	-0.000316088		1469	0.00171218		1469	-0.0130552		1469	0.00133005
					1470	0.000607604		1470	0.0003284		1470	0.000646567		1470	0.000977933		1470	-0.01294		1470	0.00224655
					1471	-9.83601e-05		1471	-0.000973113		1471	0.000289651		1471	0.000212437		1471	-0.0131884		1471	0.00192356
					1472	-0.000683701		1472	-0.00114547		1472	-0.000656832		1472	-0.00102428		1472	-0.0118405		1472	0.000831081
					1473	0.000181268		1473	-0.00076865		1473	3.71236e-05		1473	-0.000442208		1473	-0.0107361		1473	0.00151909
					1474	0.000189688		1474	-0.000442624		1474	0.00020152		1474	-9.13139e-05		1474	-0.00992519		1474	0.00212759
					1475	0.000196534		1475	-0.000597368		1475	0.000586363		1475	-0.000241577		1475	-0.00927771		1475	0.00162657
					1476	-0.00128862		1476	-0.000192853		1476	0.000831653		1476	-5.29739e-05		1476	-0.00866361		1476	0.001316
					1477	-0.00109069		1477	0.000150948		1477	0.0017374		1477	0.000954523		1477	-0.00814282		1477	0.00128589
					1478	-0.000592079		1478	7.40625e-05		1478	0.00134359		1478	0.00077094		1478	-0.00799526		1478	0.000366216
					1479	0.000467225		1479	0.000186521		1479	0.000700246		1479	0.000206305		1479	-0.00714088		1479	-1.30354e-05
					1480	0.00108723		1480	7.83533e-05		1480	-9.26404e-05		1480	0.000580649		1480	-0.00663958		1480	0.000338121
					1481	0.00134794		1481	0.00087959		1481	-0.000545066		1481	0.000324002		1481	-0.0054413		1481	0.000349671
					1482	0.000207115		1482	0.00184026		1482	-0.000867028		1482	-0.000483605		1482	-0.00417595		1482	-0.000248404
					1483	0.00146151		1483	0.0018104		1483	-0.000298525		1483	-0.000922137		1483	-0.00284344		1483	0.000343881
					1484	-0.000765613		1484	0.000440048		1484	-1.95569e-05		1484	-0.000711562		1484	-0.00263368		1484	0.000386506
					1485	-0.00149201		1485	0.000709226		1485	-0.000150122		1485	-0.00102184		1485	-0.00145658		1485	-0.000220547
					1486	-0.00132766		1486	0.00149797		1486	-0.000620219		1486	-0.000362944		1486	-0.000212052		1486	0.000872702
					1487	-0.00125257		1487	0.00149633		1487	-0.00156985		1487	0.000545173		1487	0.000520017		1487	0.00259623
					1488	-0.000626733		1488	0.00220432		1488	-0.00198901		1488	0.00129255		1488	2.97271e-05		1488	0.00268002
					1489	0.000859857		1489	0.000770455		1489	-0.0019777		1489	0.00116922		1489	0.000127186		1489	0.00273405
					1490	0.0012772		1490	0.000787742		1490	-0.00180593		1490	0.000495226		1490	-0.000177496		1490	0.00248829
					1491	0.00122531		1491	0.00250652		1491	-0.00190369		1491	0.000200615		1491	-0.0013442		1491	0.000342727
					1492	0.000474174		1492	0.00179346		1492	-0.000950978		1492	7.5429e-05		1492	-0.00269282		1492	-0.000842672
					1493	0.00173381		1493	0.00112023		1493	-0.000587806		1493	-0.000370288		1493	-0.00272322		1493	-0.000867931
					1494	0.000804204		1494	0.000376871		1494	-4.41693e-05		1494	0.00010351		1494	-0.00267528		1494	-0.000543075
					1495	0.00074537		1495	1.34271e-05		1495	0.000389929		1495	0.00037687		1495	-0.00309887		1495	-0.000528131
					1496	0.000137304		1496	0.000804592		1496	0.000894487		1496	-0.000340159		1496	-0.00296387		1496	0.000596872
					1497	0.000290009		1497	-0.000813547		1497	0.000439502		1497	-0.000237527		1497	-0.00259012		1497	0.00145191
					1498	-0.000406517		1498	0.000778962		1498	0.00106497		1498	-0.000825185		1498	-0.0022175		1498	0.000866943
					1499	-0.000402274		1499	-0.000280347		1499	0.00127089		1499	-0.00151308		1499	-0.00206586		1499	0.00016195
					1500	-0.000657261		1500	-5.35706e-05		1500	0.00183727		1500	-0.00141116		1500	-0.00123505		1500	0.000486898
					1501	7.85193e-05		1501	3.33841e-05		1501	0.00173409		1501	-0.000349368		1501	-0.000344928		1501	0.000431754
					1502	-0.000264934		1502	-0.00106944		1502	0.00134135		1502	-0.000737652		1502	-0.000325334		1502	0.000226486
					1503	-0.000547624		1503	0.000188016		1503	0.000179045		1503	-0.000175953		1503	-0.000346113		1503	-0.000338941
					1504	3.04489e-05		1504	0.000395789		1504	-0.000372822		1504	-0.000464215		1504	7.28973e-05		1504	-0.00118456
					1505	0.00068928		1505	0.00031393		1505	-0.00105426		1505	-0.00105238		1505	-0.00049814		1505	-0.00146041
					1506	-0.000391133		1506	0.00102249		1506	-0.000925269		1506	-0.00186038		1506	-0.000839056		1506	-0.00121652
					1507	9.92062e-05		1507	0.00105152		1507	-0.00047586		1507	-0.000948165		1507	-0.00092968		1507	-0.00117293
					1508	0.000700293		1508	0.000231071		1508	-0.000116035		1508	-0.00122567		1508	-0.00105984		1508	-0.00115967
					1509	-5.78775e-05		1509	-0.000668807		1509	0.0001842		1509	-0.000542821		1509	-0.000879347		1509	-0.0010068
					1510	-0.00051531		1510	-0.00105806		1510	-0.000405161		1510	-0.000559565		1510	0.000531971		1510	-0.00178434
					1511	-0.000122009		1511	-0.000566636		1511	5.876e-06		1511	-0.000665831		1511	0.0022443		1511	-0.00216233
					1512	2.20178e-05		1512	-0.000164479		1512	0.000847305		1512	-0.00112155		1512	0.00288784		1512	-0.00227082
					1513	-0.000563235		1513	-0.000351535		1513	0.00139912		1513	-0.000836662		1513	0.00317277		1513	-0.00127985
					1514	4.22261e-05		1514	0.000442251		1514	-0.000348687		1514	-0.00012109		1514	0.0035293		1514	-0.000339461
					1515	-0.000441607		1515	0.000396936		1515	-0.000906122		1515	0.000275236		1515	0.00345761		1515	3.03061e-05
					1516	0.000555259		1516	0.000232577		1516	-0.00147319		1516	0.000582386		1516	0.00273793		1516	0.000409405
					1517	3.28156e-05		1517	0.000999232		1517	-0.00247991		1517	8.04347e-05		1517	0.00341045		1517	0.000787792
					1518	0.000251054		1518	-4.94972e-05		1518	-0.00284627		1518	0.000119455		1518	0.00326538		1518	0.00077542
					1519	0.000179965		1519	-0.000103196		1519	-0.0013423		1519	0.000289523		1519	0.00219294		1519	0.000542244
					1520	0.00087954		1520	0.00133587		1520	-0.000687986		1520	0.000600715		1520	0.00110334		1520	0.00129821
					1521	-7.02308e-05		1521	0.000967171		1521	-0.00136335		1521	0.000903108		1521	0.000806819		1521	0.000903286
					1522	-0.000509359		1522	0.000379788		1522	-0.00117841		1522	0.00158678		1522	9.35853e-05		1522	0.000337408
					1523	4.21465e-05		1523	-0.000496218		1523	-0.00143315		1523	0.00179182		1523	0.00128387		1523	6.05307e-05
					1524	0.000214273		1524	-0.000270785		1524	-0.000647604		1524	0.00105829		1524	0.00219791		1524	-0.000507396
					1525	-6.29903e-05		1525	0.000516152		1525	3.82317e-05		1525	0.000606297		1525	0.00200594		1525	-0.000396423
					1526	0.000130344		1526	0.000324657		1526	0.000514344		1526	0.000625908		1526	0.0017182		1526	7.33964e-05
					1527	0.000374265		1527	0.000494795		1527	0.00104072		1527	0.000127211		1527	0.00261492		1527	0.00012201
					1528	-0.000241243		1528	0.000586632		1528	0.00128736		1528	0.000470293		1528	0.00191636		1528	-6.06363e-05
					1529	0.000433809		1529	0.000870236		1529	0.000514238		1529	-0.000124758		1529	0.00138277		1529	0.000615403
					1530	0.00144941		1530	0.000495674		1530	0.000371352		1530	-4.78548e-05		1530	0.0016544		1530	0.000240073
					1531	0.00161554		1531	0.000573014		1531	0.000908689		1531	0.000171093		1531	0.0022715		1531	-4.66841e-05
					1532	-0.000111956		1532	0.000822326		1532	0.000956237		1532	0.000312175		1532	0.00111434		1532	-0.000584924
					1533	0.00102933		1533	0.000723679		1533	0.000533984		1533	-0.000534516		1533	0.000423184		1533	-0.000134704
					1534	0.000316961		1534	-0.000382857		1534	0.000561918		1534	0.000451112		1534	-0.000521707		1534	-0.000446085
					1535	-0.000454936		1535	-0.000877209		1535	0.00140003		1535	0.00119915		1535	-0.000180058		1535	-0.000739124
					1536	-0.00127638		1536	-0.00164931		1536	0.0022183		1536	0.00114971		1536	-0.0011516		1536	0.000206117
					1537	-0.00155739		1537	-0.00178907		1537	0.00239672		1537	0.00136286		1537	-0.00166604		1537	0.00146958
					1538	-0.000507973		1538	-0.00184644		1538	0.00270528		1538	0.00202873		1538	-0.00218311		1538	0.0011412
					1539	-0.000888158		1539	-0.00230133		1539	0.00177396		1539	0.00176739		1539	-0.000892523		1539	0.00092091
					1540	-0.00107796		1540	-0.00182367		1540	0.000202745		1540	0.00180896		1540	-0.00241399		1540	0.000558655
					1541	-0.000897396		1541	-0.00127339		1541	-0.000438371		1541	0.00111353		1541	-0.00325721		1541	-0.00105563
					1542	-0.000606486		1542	-0.000684557		1542	-0.00178941		1542	0.000341207		1542	-0.0043219		1542	-0.00166202
					1543	-0.00175525		1543	-0.00065262		1543	-0.00181038		1543	-5.79055e-05		1543	-0.00429775		1543	-0.00196057
					1544	-0.00126371		1544	-0.00245599		1544	-0.00112129		1544	-0.000533703		1544	-0.00557446		1544	-0.00166135
					1545	-0.00120188		1545	-0.00219443		1545	-0.000342176		1545	-0.00138608		1545	-0.00447172		1545	-0.00077443
					1546	-0.000649781		1546	-0.00230984		1546	0.000606964		1546	-0.00100493		1546	-0.00332923		1546	0.000160124
					1547	-0.000367441		1547	-0.00106216		1547	0.00154611		1547	-0.00138014		1547	-0.00116667		1547	-0.000467758
					1548	0.000185122		1548	-0.000581294		1548	0.00185524		1548	4.70295e-05		1548	1.62791e-05		1548	-0.00109815
					1549	0.000377885		1549	-0.000297171		1549	0.00157435		1549	4.23456e-05		1549	-0.000480064		1549	-0.00100111
					1550	-0.000279173		1550	-0.000309704		1550	0.000763418		1550	-0.00202285		1550	-0.00110538		1550	-0.000406724
					1551	-0.000456076		1551	0.00116119		1551	-0.000147576		1551	2.96118e-05		1551	-0.00198933		1551	-0.000185058
					1552	-0.000642847		1552	0.000865595		1552	-0.000768646		1552	-0.000847776		1552	-0.00223158		1552	0.00153381
					1553	0.00038049		1553	0.000823595		1553	-0.00115981		1553	0.000431172		1553	-0.00202182		1553	0.00239982
					1554	-8.60892e-05		1554	0.000545277		1554	-0.00144108		1554	0.000424549		1554	-4.96803e-05		1554	0.00263288
					1555	0.00115739		1555	0.000620727		1555	-0.000962488		1555	-0.00026753		1555	0.00214516		1555	0.00225292
					1556	0.00175091		1556	-0.000539969		1556	-0.00125404		1556	-0.000294944		1556	0.00336306		1556	0.00164987
					1557	0.00010972		1557	3.27856e-06		1557	-0.000345752		1557	-3.75729e-05		1557	0.00288436		1557	-2.63572e-05
					1558	0.000917932		1558	0.000520557		1558	-0.00089765		1558	-8.52963e-05		1558	0.00230941		1558	-0.000585833
					1559	-2.86066e-05		1559	0.00199196		1559	-0.000419751		1559	0.00146201		1559	0.00226858		1559	-0.00134864
					1560	-0.000695216		1560	0.00279757		1560	-6.20725e-05		1560	0.00127447		1560	0.00215222		1560	-0.00104485
					1561	-0.000381924		1561	0.00336748		1561	0.000305365		1561	0.0008422		1561	0.0029907		1561	-0.000354557
					1562	-0.000335919		1562	0.00180602		1562	-3.69467e-05		1562	-0.000374075		1562	0.00149897		1562	0.000988175
					1563	-0.000419587		1563	0.00135066		1563	0.000514248		1563	-0.000811838		1563	-0.00252935		1563	0.000976768
					1564	-0.000612683		1564	-0.000216048		1564	-0.000674726		1564	-0.00298997		1564	-0.0321885		1564	-0.00130589
					1565	-0.00386522		1565	-0.00138411		1565	-0.00169385		1565	-0.00589849		1565	-0.0876485		1565	-0.00615979
					1566	-0.00881721		1566	-0.0041435		1566	-0.000793095		1566	-0.00897742		1566	-0.15781		1566	-0.0118349
					1567	-0.0146687		1567	-0.00875421		1567	0.00280755		1567	-0.0132168		1567	-0.232952		1567	-0.0177013
					1568	-0.0182696		1568	-0.0133562		1568	0.00793812		1568	-0.0155465		1568	-0.283576		1568	-0.019629
					1569	-0.02007		1569	-0.0163496		1569	0.0142886		1569	-0.0159468		1569	-0.292022		1569	-0.0177979
					1570	-0.0182399		1570	-0.0171342		1570	0.0192891		1570	-0.0135175		1570	-0.265569		1570	-0.012948
					1571	-0.0148494		1571	-0.0149801		1571	0.0211395		1571	-0.0112187		1571	-0.220838		1571	-0.00653931
					1572	-0.0108683		1572	-0.00958724		1572	0.0199199		1572	-0.00855034		1572	-0.172079		1572	-0.000361883
					1573	-0.00685681		1573	-0.00471566		1573	0.0144104		1573	-0.00642252		1573	-0.142743		1573	0.00255431
					1574	-0.00340486		1574	-0.00128531		1574	0.00723082		1574	-0.00538522		1574	-0.129189		1574	0.00291929
					1575	-0.00113245		1575	0.000783799		1575	1.33572e-06		1575	-0.00494845		1575	-0.122857		1575	0.000873052
					1576	0.000370376		1576	0.0024917		1576	-0.00677808		1576	-0.00461222		1576	-0.117787		1576	-0.000254396
					1577	0.00140362		1577	0.00224839		1577	-0.00353226		1577	-0.00349655		1577	-0.108431		1577	0.00100695
					1578	0.00131728		1578	0.00305389		1578	-0.00526167		1578	-0.00304145		1578	-0.097007		1578	0.0043371
					1579	0.000931329		1579	0.00365822		1579	-0.00635176		1579	-0.00215692		1579	-0.0851262		1579	0.00718606
					1580	-0.000634237		1580	0.00238138		1580	-0.00992477		1580	-0.00146297		1580	-0.0735483		1580	0.000663954
					1581	-0.00178943		1581	0.00131338		1581	-0.00590361		1581	1.03791e-05		1581	-0.0638837		1581	0.000297556
					1582	-0.00209426		1582	0.00155425		1582	-0.00222229		1582	0.000753126		1582	-0.0571022		1582	-5.40537e-05
					1583	-0.00124874		1583	0.00142399		1583	-0.00646248		1583	-0.0008064		1583	-0.0510442		1583	0.00471016
					1584	-0.00145288		1584	0.00085262		1584	-0.000949108		1584	-0.000640533		1584	-0.0452595		1584	0.00176329
					1585	-0.0012967		1585	0.000880151		1585	-0.00108722		1585	-0.000498967		1585	-0.0411484		1585	-0.00114472
					1586	-0.00127019		1586	-7.34033e-05		1586	-0.00166511		1586	0.000547921		1586	-0.0376409		1586	-0.00466385
					1587	-0.00200338		1587	-0.000898028		1587	-0.00302277		1587	-0.000702464		1587	-0.0329672		1587	-0.00771411
					1588	-0.00348627		1588	0.000606616		1588	-0.00416018		1588	-0.0016635		1588	-0.0292672		1588	-0.00187255
					1589	-0.00290888		1589	-0.000500433		1589	-0.00389734		1589	-3.47531e-05		1589	-0.0273311		1589	-0.00211673
					1590	-0.00321121		1590	0.00112181		1590	-0.00475424		1590	7.50101e-05		1590	-0.025189		1590	-0.00233789
					1591	-0.00395327		1591	0.000255122		1591	-0.00602085		1591	0.000184563		1591	-0.0234208		1591	-0.00253323
					1592	-0.00399509		1592	0.000170313		1592	-0.00609718		1592	-0.00045418		1592	-0.0239268		1592	-0.00270026
					1593	-0.00319666		1593	0.00157253		1593	-0.0051232		1593	0.000281487		1593	-0.0231968		1593	-0.00283694
					1594	-0.00405799		1594	-9.91831e-05		1594	-0.00408892		1594	0.000686483		1594	-0.0213011		1594	-0.0101562
					1595	-0.00310911		1595	-0.000721856		1595	-0.00202431		1595	0.00141081		1595	-0.0204297		1595	-0.00853497
					1596	-0.00191001		1596	-0.000785468		1596	-0.000649371		1596	0.00114445		1596	-0.0193125		1596	-0.00821473
					1597	-0.00130071		1597	0.000109996		1597	0.000395905		1597	0.000417419		1597	-0.0189397		1597	-0.00778549
					1598	-0.00231122		1598	0.000914551		1598	0.00136153		1598	0.000729709		1598	-0.0191913		1598	-0.00621721
					1599	-0.00251154		1599	0.00120821		1599	0.00102751		1599	0.00081132		1599	-0.0203773		1599	-0.00604989
					1600	-0.00327169		1600	0.001171		1600	0.00112385		1600	0.000542252		1600	-0.0208378		1600	-0.00749351
					1601	-0.00350169		1601	0.00126292		1601	0.00108056		1601	0.0014725		1601	-0.0200528		1601	-0.00715805
					1602	-0.00317153		1602	0.001184		1602	0.00159765		1602	0.00149208		1602	-0.0182124		1602	-0.0058135
					1603	-0.00103122		1603	0.000944246		1603	0.00103513		1603	0.00129098		1603	-0.0175164		1603	-0.00410983
					1604	-0.000500786		1604	0.000823681		1604	0.00229299		1604	0.0014092		1604	-0.0170751		1604	-0.00310704
					1605	-0.00156527		1605	0.00102232		1605	0.00232125		1605	0.000966749		1605	-0.0166784		1605	-0.00187509
					1606	-0.000899555		1606	0.00126018		1606	0.00179992		1606	0.000843629		1606	-0.0162662		1606	-0.00109398
					1607	-0.00128878		1607	0.00052727		1607	0.00157899		1607	0.00118984		1607	-0.0160587		1607	-0.000693677
					1608	-0.00229791		1608	0.000313616		1608	0.00171847		1608	0.000325393		1608	-0.0146858		1608	-0.000484167
					1609	-0.00201695		1609	0.000809233		1609	0.000228366		1609	-0.000419715		1609	-0.0135175		1609	0.000794571
					1610	-0.00173592		1610	-7.5864e-05		1610	3.86815e-05		1610	0.00124452		1610	-0.0131439		1610	0.00179256
					1611	-0.000394825		1611	-0.000501657		1611	0.00093942		1611	0.00121811		1611	-0.0137549		1611	0.00307982
					1612	-0.000383671		1612	-0.00131813		1612	0.000710584		1612	0.00152106		1612	-0.0137104		1612	0.00397637
					1613	-0.000422469		1613	-0.00135526		1613	0.000622177		1613	0.00211337		1613	-0.0136406		1613	0.00490223
					1614	-9.1229e-05		1614	-0.00146304		1614	0.0012842		1614	0.00249505		1614	-0.0125853		1614	0.00515743
					1615	-0.000449959		1615	-0.00087144		1615	0.00159665		1615	0.0019161		1615	-0.0117946		1615	-0.00026537
					1616	-0.00138867		1616	-0.00116045		1616	0.00153954		1616	0.00211654		1616	-0.0109984		1616	-7.69052e-05
					1617	-0.00145737		1617	-0.00110005		1617	0.000612865		1617	0.000946374		1617	-0.0100167		1617	0.000105832
					1618	-0.00131606		1618	-0.00141022		1618	-0.000293378		1618	0.00107561		1618	-0.00936946		1618	0.00640208
					1619	-0.00173476		1619	-0.00091095		1619	-0.000479185		1619	0.000834252		1619	-0.00949666		1619	0.00682433
					1620	-0.00179348		1620	-0.000682212		1620	-0.00155456		1620	-0.000277685		1620	-0.00768824		1620	0.00573606
					1621	-0.000242218		1621	-0.000433991		1621	-0.0016095		1621	-0.000690192		1621	-0.00652418		1621	0.00489729
					1622	0.000759011		1622	4.37322e-05		1622	-0.000973999		1622	0.000856741		1622	-0.0073744		1622	0.00390806
					1623	0.0013802		1623	-0.000149025		1623	-0.000528072		1623	0.00119312		1623	-0.00670888		1623	0.00241839
					1624	-0.000170691		1624	0.000117758		1624	-0.000381715		1624	0.000948971		1624	-0.00522754		1624	0.00100832
					1625	-0.000144756		1625	0.000124099		1625	-0.000164929		1625	0.000694292		1625	-0.00500033		1625	0.000937854
					1626	0.00145344		1626	0.000690018		1626	-0.000387719		1626	0.0008991		1626	-0.0037672		1626	0.00199703
					1627	0.000684377		1627	7.29647e-05		1627	-0.000820086		1627	1.34081e-05		1627	-0.00150806		1627	0.00244589
					1628	-6.47644e-05		1628	6.68021e-05		1628	-0.000542034		1628	-0.000772771		1628	-0.00153285		1628	0.00381445
					1629	-0.000823996		1629	0.00177543		1629	-0.00141357		1629	-0.000159423		1629	-0.0024515		1629	0.00403273
					1630	-0.000633326		1630	0.00162986		1630	-0.000674691		1630	0.000673467		1630	-0.00340393		1630	0.00284078
					1631	-0.000932763		1631	0.00115396		1631	-0.00112541		1631	0.000585913		1631	-0.00466005		1631	0.00133862
					1632	-0.000392315		1632	-0.000382249		1632	-0.000995723		1632	0.00134793		1632	-0.00499979		1632	0.000346285
					1633	0.000178011		1633	-0.000368738		1633	-0.00130564		1633	0.00187954		1633	-0.00436304		1633	-0.0007462
					1634	0.000108206		1634	-0.000435492		1634	-0.000505174		1634	0.00156074		1634	-0.00328972		1634	0.000491201
					1635	-0.00117174		1635	-0.00148249		1635	-0.000694321		1635	0.00201157		1635	-0.00215973		1635	0.00170852
					1636	-0.00106183		1636	-0.00110971		1636	-0.000463091		1636	0.00130204		1636	-0.000422974		1636	0.00183578
					1637	-0.00122207		1637	-0.000697132		1637	0.000398509		1637	0.00136216		1637	0.000310661		1637	0.00220303
					1638	3.77125e-06		1638	-0.000994737		1638	-0.000459529		1638	0.000781956		1638	0.00127128		1638	0.0022003
					1639	-0.000503047		1639	-0.000442503		1639	-0.00109721		1639	0.00105144		1639	0.001059		1639	0.00117761
					1640	0.0012362		1640	0.000329592		1640	-0.00183455		1640	9.0643e-05		1640	0.00126392		1640	-7.49874e-05
					1641	0.00110527		1641	-0.000388432		1641	-0.00191155		1641	0.000909574		1641	9.61838e-05		1641	0.00037253
					1642	0.000304145		1642	-0.000356552		1642	-0.00304822		1642	-0.000431745		1642	-0.0012941		1642	0.000390202
					1643	-0.000457178		1643	-0.000394749		1643	-0.00215457		1643	-0.000113291		1643	-0.0016968		1643	0.000148064
					1644	-0.000888706		1644	-0.001603		1644	-0.00171061		1644	-0.000735044		1644	-0.000911784		1644	0.000286151
					1645	-0.00100045		1645	-4.98383e-05		1645	-0.000816354		1645	-0.000536983		1645	-0.00146892		1645	0.0014745
					1646	-0.00139241		1646	-0.00151958		1646	-7.18078e-05		1646	-0.00123909		1646	-0.00128806		1646	0.00117315
					1647	-0.000194597		1647	2.21417e-05		1647	0.000893016		1647	-0.000671328		1647	0.000150921		1647	0.00125213
					1648	0.000232981		1648	0.00162389		1648	0.0013981		1648	-0.000413688		1648	8.1848e-06		1648	0.000841496
					1649	0.000460318		1649	-6.56013e-05		1649	0.00125345		1649	8.3857e-05		1649	-0.000436123		1649	-0.000968731
					1650	-0.000342593		1650	-6.8354e-05		1650	0.000779034		1650	0.000201332		1650	-0.000161848		1650	-0.00228851
					1651	-5.7583e-06		1651	-7.0614e-05		1651	0.000284849		1651	0.000138761		1651	2.11673e-05		1651	-0.00267779
					1652	0.000330815		1652	0.000971684		1652	-0.00049912		1652	-0.00066383		1652	-0.000276915		1652	-0.00243654
					1653	0.000897121		1653	-0.00095606		1653	-0.000402886		1653	-0.00177642		1653	-0.000285931		1653	-0.000994723
					1654	-0.000106848		1654	-0.00138363		1654	-0.000766463		1654	-8.18792e-05		1654	-0.000295709		1654	0.000357707
					1655	-1.10978e-05		1655	-0.00133102		1655	-0.00132987		1655	-8.80099e-05		1655	-0.000566078		1655	0.00109079
					1656	0.000844365		1656	-0.00126818		1656	-0.00179311		1656	-9.29837e-05		1656	-0.00027686		1656	0.000464565
					1657	0.00129953		1657	-0.00160511		1657	-0.00167621		1657	-9.68338e-05		1657	-0.000497874		1657	-0.00108092
					1658	-6.60412e-06		1658	-0.000311773		1658	-0.00254917		1658	-0.00122836		1658	-0.000408937		1658	-0.00243563
					1659	-7.62312e-06		1659	0.000171849		1659	-0.00180203		1659	-0.000530353		1659	0.00016014		1659	-0.00273952
					1660	-8.52763e-06		1660	0.00069578		1660	-0.000924783		1660	0.000647846		1660	0.00223955		1660	-0.00244254
					1661	-9.31009e-06		1661	0.000620046		1661	-0.000107459		1661	0.00105627		1661	0.00336949		1661	-0.00266466
					1662	0.000480749		1662	0.000964668		1662	-0.000150071		1662	-0.000100521		1662	0.00343015		1662	-0.00210582
					1663	-0.000105977		1663	0.000619673		1663	-0.000142637		1663	0.00118392		1663	0.00268175		1663	-0.00147599
					1664	-9.30402e-05		1664	0.000305084		1664	-0.000395174		1664	0.000143199		1664	0.00198448		1664	-0.00164512
					1665	-0.000370446		1665	-0.000299074		1665	-2.77004e-05		1665	0.000112829		1665	-0.000581437		1665	-0.00143315
					1666	-0.0013582		1666	-0.000502777		1666	-0.000120236		1666	-0.000707162		1666	-0.00161579		1666	-0.000810057
					1667	-0.00109631		1667	-0.000426001		1667	0.000537202		1667	-0.000736741		1667	-0.00197836		1667	-0.00122578
					1668	-0.00148478		1668	7.1281e-05		1668	0.00114459		1668	-0.000325876		1668	-0.00130893		1668	-0.00134028
					1669	-1.08004e-05		1669	0.000649092		1669	0.00123192		1669	0.000505467		1669	-0.00127726		1669	-0.000103502
					1670	-1.03997e-05		1670	0.00101746		1670	0.000599152		1670	0.000657321		1670	-0.000333135		1670	-0.000815404
					1671	-0.0011924		1671	0.0014064		1671	0.000256281		1671	0.00119972		1671	-0.000236314		1671	2.4064e-05
					1672	-0.000782372		1672	0.00170596		1672	0.000373281		1672	0.000612699		1672	0.00041344		1672	0.000854951
					1673	-0.000842726		1673	-9.86945e-06		1673	0.000160131		1673	0.000876293		1673	0.000366368		1673	0.000437305
					1674	0.000116526		1674	0.000896977		1674	0.000546809		1674	0.00128054		1674	0.000552715		1674	-0.000928824
					1675	-7.46202e-05		1675	0.000238498		1675	0.00111329		1675	0.000765468		1675	0.00078273		1675	-0.000613385
					1676	-5.61702e-05		1676	-0.000229273		1676	0.00132956		1676	-0.000338878		1676	0.000666666		1676	-0.00125633
					1677	-0.000868129		1677	-0.000676309		1677	0.00134559		1677	-0.000402464		1677	0.00097478		1677	-0.000927605
					1678	-0.000470502		1678	-0.00127258		1678	0.00177135		1678	-0.00128525		1678	0.00103733		1678	-0.000877161
					1679	-0.00122329		1679	-0.00147807		1679	0.00170682		1679	1.30777e-05		1679	0.000934583		1679	-0.000654945
					1680	-0.00066651		1680	-0.00131275		1680	0.00172199		1680	2.19187e-05		1680	0.000176806		1680	-0.00151091
					1681	-0.000700155		1681	0.000273415		1681	0.00204682		1681	-0.000488448		1681	-9.57298e-05		1681	-0.00176499
					1682	5.57667e-05		1682	-8.9555e-05		1682	0.000821282		1682	0.000742339		1682	-0.000522748		1682	-0.00126714
					1683	0.00070125		1683	-0.00102163		1683	-0.000164639		1683	0.000714119		1683	-0.00101397		1683	-0.000367315
					1684	0.000996289		1684	-0.000102787		1684	-9.09717e-05		1684	0.00105693		1684	-0.000259113		1684	0.000114551
					1685	0.000690881		1685	0.000377005		1685	-0.000837744		1685	0.00111082		1685	0.000192111		1685	0.00122851
					1686	0.000565021		1686	-0.000342229		1686	-0.000994981		1686	-0.000214181		1686	0.000389992		1686	0.00180461
					1687	0.000678703		1687	7.95394e-05		1687	0.000197288		1687	-0.000708023		1687	0.000234825		1687	0.00180292
					1688	-6.80761e-05		1688	0.00152234		1688	0.000639038		1688	0.000479335		1688	0.000506908		1688	0.00141348
					1689	0.000364679		1689	0.00158619		1689	0.00052024		1689	0.000767934		1689	-0.000353457		1689	0.00147636
					1690	0.000286964		1690	0.00120113		1690	0.000550865		1690	0.000617819		1690	-0.00105596		1690	0.00138161
					1691	0.000828775		1691	0.000657187		1691	0.000450886		1691	0.000939033		1691	-0.000520303		1691	0.000969281
					1692	-0.000789894		1692	-0.000175619		1692	-0.000149728		1692	0.000751621		1692	-0.00104616		1692	0.000539442
					1693	-0.000609045		1693	-0.00131726		1693	0.000488995		1693	-0.000324373		1693	-0.00151322		1693	0.00148215
					1694	-0.000298682		1694	-0.00127769		1694	0.00113703		1694	-0.000908904		1694	-0.00155116		1694	0.00156745
					1695	-0.000608811		1695	-0.000716906		1695	0.000774331		1695	-0.000681926		1695	-0.00104965		1695	0.00115542
					1696	-0.000809434		1696	-0.000734864		1696	0.000400883		1696	0.000906608		1696	-0.00159837		1696	0.000376106
					1697	0.000129443		1697	-0.000781538		1697	0.000516649		1697	0.000736743		1697	-0.00131699		1697	-0.000560427
					1698	0.000597819		1698	-0.000466901		1698	-0.000268401		1698	0.00103853		1698	-0.000285165		1698	-0.00207412
					1699	0.000645688		1699	-0.000480922		1699	-0.0009943		1699	0.000502009		1699	0.000297443		1699	-0.00222491
					1700	0.00158305		1700	-0.00108357		1700	-0.00034108		1700	0.000257236		1700	0.000651177		1700	-0.00211274
					1701	0.00120989		1701	-0.000824823		1701	0.000761227		1701	-0.000775745		1701	0.000406384		1701	-0.000747547
					1702	0.000836219		1702	-0.000394645		1702	0.00134259		1702	-0.000616882		1702	0.000963417		1702	5.0733e-05
					1703	0.000362027		1703	-4.30082e-05		1703	0.000812966		1703	-0.000756128		1703	0.00056263		1703	0.000532161
					1704	-0.000372691		1704	0.000250117		1704	7.23316e-05		1704	-0.000663431		1704	0.000144382		1704	-0.000393199
					1705	-0.000877935		1705	0.00070476		1705	-0.000689351		1705	-0.000418742		1705	0.000329036		1705	-0.000355284
					1706	-0.000213711		1706	0.000380951		1706	-0.00164212		1706	-0.000942009		1706	0.000656959		1706	-3.40313e-05
					1707	0.000559979		1707	0.000668721		1707	-0.002176		1707	-0.00063318		1707	-7.14789e-05		1707	0.000590625
					1708	0.000543132		1708	0.000548099		1708	-0.00136104		1708	-0.000592205		1708	-0.000835903		1708	0.000828748
					1709	-0.000154256		1709	0.000219115		1709	-0.00107726		1709	0.000180971		1709	-6.5936e-05		1709	0.00143041
					1710	-0.00108219		1710	0.000191801		1710	-0.000374717		1710	-0.000363602		1710	0.000708804		1710	0.00104566
					1711	-0.00143067		1711	0.000366186		1711	-0.000323432		1711	0.000244133		1711	0.0015987		1711	0.00108458
					1712	-0.00147651		1712	0.000536091		1712	0.00060914		1712	-0.000385645		1712	0.00183657		1712	-0.000163263
					1713	-0.00204286		1713	0.00085086		1713	4.53774e-05		1713	-0.000420266		1713	-0.00109301		1713	-0.00034243
					1714	-0.00288906		1714	0.000844333		1714	-0.00069789		1714	-0.00244552		1714	-0.0277921		1714	-0.00136249
					1715	-0.00507515		1715	-0.000553461		1715	-0.0010206		1715	-0.00454142		1715	-0.0793807		1715	-0.00395342
					1716	-0.00908117		1716	-0.0040425		1716	-0.000372686		1716	-0.00826794		1716	-0.146699		1716	-0.00861522
					1717	-0.0131372		1717	-0.00909275		1717	0.00198591		1717	-0.0116251		1717	-0.220117		1717	-0.0123979
					1718	-0.0169431		1718	-0.0145742		1718	0.00677524		1718	-0.0142729		1718	-0.271774		1718	-0.0140813
					1719	-0.0186991		1719	-0.0175368		1719	0.0120354		1719	-0.0143113		1719	-0.282472		1719	-0.0131156
					1720	-0.0178551		1720	-0.0180805		1720	0.0151764		1720	-0.0134103		1720	-0.259289		1720	-0.00955071
					1721	-0.0153912		1721	-0.0149654		1721	0.0170483		1721	-0.0110899		1721	-0.216695		1721	-0.00521658
					1722	-0.0124274		1722	-0.0105413		1722	0.0162611		1722	-0.0089901		1722	-0.167092		1722	-0.00136323
					1723	-0.00691375		1723	-0.0057083		1723	0.0119449		1723	-0.00694091		1723	-0.134118		1723	0.000489375
					1724	-0.00312023		1724	-0.00284632		1724	0.00569987		1724	-0.00559232		1724	-0.119405		1724	0.000521241
					1725	-0.00051689		1725	-0.000695345		1725	0.000635896		1725	-0.00538432		1725	-0.111901		1725	-0.00102761
					1726	0.00144625		1726	-0.000875345		1726	-0.00523693		1726	-0.0048269		1726	-0.106637		1726	-0.00178718
					1727	0.00169915		1727	-0.000956295		1727	-0.00114587		1727	-0.00395005		1727	-0.100023		1727	-0.000869462
					1728	0.000351812		1728	-0.000668169		1728	-0.00292013		1728	-0.00344377		1728	-0.0922595		1728	-0.00224835
					1729	-3.58017e-05		1729	-0.00120094		1729	-0.00423648		1729	-0.00340805		1729	-0.0824658		1729	-0.00208992
					1730	-0.000913708		1730	0.000103472		1730	-0.00902583		1730	-0.00262289		1730	-0.0735321		1730	-0.000252138
					1731	-0.00147193		1731	-0.00245907		1731	-0.00558226		1731	-0.000668269		1731	-0.0640186		1731	-0.000907706
					1732	-0.000880483		1732	-0.00231438		1732	-0.00219729		1732	0.00028581		1732	-0.0546953		1732	-0.000884021
					1733	-0.000539389		1733	-0.00234048		1733	-0.00589957		1733	-5.06443e-05		1733	-0.0475221		1733	-0.000863883
					1734	-0.000998667		1734	-0.00151735		1734	-0.00577883		1734	0.000552378		1734	-0.0416092		1734	-0.000847937
					1735	-0.000658332		1735	-0.000134959		1735	-0.000833678		1735	0.00134488		1735	-0.0360065		1735	0.000227816
					1736	-0.000518403		1736	0.00125672		1736	-0.0022528		1736	-0.000243117		1736	-0.0318841		1736	-0.000337865
					1737	-0.000468894		1737	0.00163771		1737	-0.00405037		1737	-0.000711617		1737	-0.030272		1737	-0.000864062
					1738	-0.000549822		1738	-0.00066581		1738	-0.00519635		1738	0.000619393		1738	-0.0275003		1738	-0.00154076
					1739	-0.0002612		1739	-0.00071473		1739	-0.00615074		1739	0.000699923		1739	-0.025559		1739	-0.00188793
					1740	-0.000773043		1740	-0.0007516		1740	-0.00632349		1740	-0.00027002		1740	-0.024958		1740	-0.00180556
					1741	-0.00183536		1741	0.000905333		1741	-0.00576459		1741	-0.000410424		1741	-0.0237176		1741	-0.000776105
					1742	6.13026e-05		1742	0.00117328		1742	-0.00423402		1742	-0.000781281		1742	-0.0214276		1742	-0.000760348
					1743	-8.94826e-06		1743	0.000170702		1743	-0.00297176		1743	-0.00058258		1743	-0.020128		1743	-0.00159104
					1744	-8.02681e-05		1744	-0.000242383		1744	-0.0024678		1744	-2.43104e-05		1744	-0.018409		1744	-0.000750332
					1745	-0.000899642		1745	-0.000935944		1745	-0.00218211		1745	0.00118354		1745	-0.0178206		1745	-0.00125999
					1746	-0.000994513		1746	-0.000959957		1746	-0.00225468		1746	0.00232097		1746	-0.0193527		1746	-0.00120999
					1747	-0.000419923		1747	-0.0022344		1747	-0.0023455		1747	8.7981e-05		1747	-0.0209855		1747	-0.00140032
					1748	0.000474122		1748	-0.00233923		1748	-0.00204457		1748	0.00175466		1748	-0.0228389		1748	-0.00159096
					1749	0.000527613		1749	-0.00277444		1749	-0.00126186		1749	0.00157093		1749	-0.025393		1749	-0.00184188
					1750	-0.00165945		1750	-0.00234		1750	-0.000397375		1750	0.000916836		1750	-0.0259577		1750	-0.000743079
					1751	-0.000737084		1751	-0.00257587		1751	0.000708894		1751	0.000102387		1751	-0.0258432		1751	-0.000634521
					1752	-0.000965283		1752	-0.00154204		1752	0.000186951		1752	-0.000392403		1752	-0.0261594		1752	0.00052381
					1753	-0.00162405		1753	-0.000818485		1753	-0.000233201		1753	0.000532477		1753	-0.0255564		1753	0.000881933
					1754	-0.0016134		1754	-0.000175167		1754	0.00027844		1754	0.000747041		1754	-0.0248342		1754	0.00088987
					1755	-6.33234e-05		1755	0.000227935		1755	0.000441873		1755	0.0010013		1755	-0.0233228		1755	2.76408e-05
					1756	0.00118618		1756	0.000700847		1756	-0.000202903		1756	0.000785269		1756	-0.0211123		1756	0.000915267
					1757	-0.000614096		1757	-9.64051e-05		1757	0.000104108		1757	-1.03969e-06		1757	-0.0199026		1757	-0.000267764
					1758	-0.000608375		1758	-0.000433795		1758	0.0007829		1758	-0.000467613		1758	-0.0190138		1758	0.00142017
					1759	-0.00059667		1759	-0.000301298		1759	0.000523469		1759	-0.000834437		1759	-0.0173759		1759	0.000967485
					1760	-0.000579497		1760	-8.88588e-06		1760	0.000735804		1760	-0.000471497		1760	-0.016569		1760	0.00129474
					1761	-0.000557392		1761	-0.000576534		1761	0.000879896		1761	-0.000688779		1761	-0.015493		1761	0.000711962
					1762	-0.000530903		1762	3.57835e-05		1762	0.00200573		1762	0.000343731		1762	-0.013198		1762	-0.000110836
					1763	0.000976507		1763	0.000998093		1763	0.00162331		1763	0.000286047		1763	-0.011944		1763	-0.000293627
					1764	0.000331419		1764	0.00142042		1764	0.0010226		1764	-2.18151e-05		1764	-0.0118311		1764	-0.000766392
					1765	-0.00115423		1765	0.00107279		1765	0.000573586		1765	0.00025016		1765	-0.0119792		1765	-0.00104911
					1766	-0.00181042		1766	0.000935233		1766	0.000346262		1766	-0.000228013		1766	-0.0108684		1766	-0.00129175
					1767	-0.000351221		1767	0.00074777		1767	-0.000639398		1767	-0.000466319		1767	-0.0106886		1767	-0.000374297
					1768	-0.000309267		1768	-0.000389572		1768	-0.00114341		1768	-0.000864741		1768	-0.01003		1768	-0.000136727
					1769	-0.00193224		1769	-0.00119677		1769	-0.000915808		1769	-0.00188326		1769	-0.0089525		1769	0.000580983
					1770	-0.00122056		1770	-0.00115379		1770	-0.000326605		1770	4.02744e-05		1770	-0.00717616		1770	0.000988856
					1771	-0.000359385		1771	-3.06074e-05		1771	0.000634169		1771	-0.00194054		1771	-0.00761099		1771	0.00114692
					1772	0.000721291		1772	-0.000277204		1772	0.000866487		1772	-0.00232927		1772	-0.006667		1772	0.000405185
					1773	0.00152148		1773	-0.000263549		1773	0.00112032		1773	-0.00106803		1773	-0.00560423		1773	-0.000166313
					1774	0.000791199		1774	-0.000529617		1774	0.000465637		1774	0.000173198		1774	-0.00470268		1774	-0.000377553
					1775	-0.000349543		1775	0.000414617		1775	-0.000637594		1775	0.000264423		1775	-0.00445237		1775	-0.000378513
					1776	-0.00181073		1776	0.00040918		1776	-0.00190941		1776	0.000275667		1776	-0.00308333		1776	-0.000539168
					1777	-0.00184235		1777	0.0010141		1777	-0.00243983		1777	0.000196947		1777	-0.00252557		1777	-0.0012095
					1778	0.000110848		1778	0.00133939		1778	-0.00192892		1778	-0.000721719		1778	-0.0021091		1778	-0.000709469
					1779	-0.00101682		1779	0.0019051		1779	-0.00121669		1779	-0.000440311		1779	-0.00127395		1779	-0.000279065
					1780	0.000150365		1780	0.00125123		1780	-0.000453199		1780	-0.000618812		1780	-2.01194e-05		1780	4.17399e-05
					1781	0.00113718		1781	0.000987823		1781	1.15203e-05		1781	-0.000687203		1781	-0.000147637		1781	-0.000167028
					1782	0.000103656		1782	0.0010849		1782	-0.000552578		1782	0.000254536		1782	-0.000326515		1782	0.000264655
					1783	-0.000150199		1783	0.00123248		1783	-0.000545539		1783	-3.35771e-05		1783	-0.000106768		1783	0.000436814
					1784	-2.43608e-05		1784	0.0014106		1784	-0.000767409		1784	-0.000741522		1784	-0.00111841		1784	0.000189475
					1785	0.000231191		1785	-0.000230722		1785	-0.000148236		1785	-0.000529278		1785	-0.00218146		1785	-0.000547337
					1786	0.000546479		1786	-0.000601458		1786	-0.00075807		1786	-0.000266827		1786	-0.00219592		1786	0.000136403
					1787	0.00159152		1787	-0.000561582		1787	-0.000446961		1787	-0.000884147		1787	-0.00278182		1787	0.000760721
					1788	0.000383982		1788	-0.000951069		1788	-0.000954963		1788	-0.000931219		1788	-0.00377916		1788	0.000155642
					1789	0.00186098		1789	-0.00201989		1789	-0.00163213		1789	-0.000888021		1789	-0.00371796		1789	0.000431193
					1790	0.00185544		1790	-0.000658028		1790	-0.00219852		1790	-4.53269e-06		1790	-0.00345823		1790	0.000337399
					1791	0.00117976		1791	-0.000825449		1791	-0.000414187		1791	0.000449267		1791	-0.00368999		1791	0.000174288
					1792	0.00115395		1792	-0.00177213		1792	0.000780807		1792	0.000793399		1792	-0.00299324		1792	-0.000488116
					1793	0.00224806		1793	-0.00128805		1793	0.0010564		1793	0.00130789		1793	-0.00219799		1793	0.000460215
					1794	0.000439567		1794	-0.000873171		1794	0.00175253		1794	0.00136275		1794	-0.00205427		1794	0.000209308
					1795	0.0016861		1795	-0.00105748		1795	0.00188914		1795	0.000668011		1795	-0.00227207		1795	-0.000330812
					1796	0.00176009		1796	-0.000880946		1796	0.00132616		1796	0.000123694		1796	-0.00237141		1796	-0.000280116
					1797	0.000404114		1797	-0.000293545		1797	0.000183517		1797	0.000929819		1797	-0.0016523		1797	-0.000648578
					1798	-0.000611813		1798	0.00032475		1798	0.000141148		1798	0.00143641		1798	-0.00119476		1798	-0.00115617
					1799	-0.000787654		1799	0.000803963		1799	0.000478981		1799	0.00210349		1799	0.000301222		1799	0.000171309
					1800	-0.000893377		1800	0.00165412		1800	0.000536944		1800	-7.27696e-05		1800	0.00137562		1800	-0.000728637
					1801	-0.00074895		1801	0.00150525		1801	-6.50363e-05		1801	-7.08404e-05		1801	0.00191844		1801	-0.000133455
					1802	-0.000194338		1802	0.00170737		1802	9.2965e-05		1802	-6.85872e-05		1802	0.00158965		1802	0.000822707
					1803	-0.00101951		1803	0.000800515		1803	-0.000129129		1803	0.000817176		1803	0.00170927		1803	0.000979877
					1804	0.0003585		1804	0.000524704		1804	-0.000131397		1804	-0.000142944		1804	0.00106727		1804	0.000111672
					1805	-0.000639044		1805	-7.00343e-05		1805	-0.000293919		1805	0.000297568		1805	0.000293653		1805	9.87295e-05
					1806	-0.00056334		1806	-0.000553676		1806	-0.000196775		1806	0.000458737		1806	-0.000431589		1806	0.000837719
					1807	-0.000737271		1807	-0.000956195		1807	-0.00111005		1807	0.000680588		1807	-0.00125846		1807	0.000689206
					1808	-0.000680799		1808	-0.000607566		1808	-0.00133383		1808	0.00184315		1808	-0.00232698		1808	-0.000598157
					1809	0.000386117		1809	-0.00122776		1809	-0.0022582		1809	0.00195643		1809	-0.00232714		1809	4.50021e-05
					1810	0.000193515		1810	-0.00153676		1810	-0.00259324		1810	0.00117048		1810	-0.00204895		1810	-0.00100931
					1811	-0.000428563		1811	-0.00130454		1811	-0.00230906		1811	0.000675312		1811	-0.00100241		1811	0.00129695
					1812	-0.00126008		1812	-0.00184106		1812	-0.00137573		1812	-6.90479e-05		1812	-0.000627542		1812	0.00102448
					1813	-0.000670983		1813	-6.36289e-05		1813	-0.00156335		1813	-0.000702572		1813	0.000345664		1813	-9.76102e-06
					1814	-0.00110124		1814	-0.00224026		1814	-0.000582018		1814	-0.000295234		1814	-0.000102799		1814	-2.32818e-05
					1815	8.9168e-05		1815	-0.00161289		1815	3.81735e-05		1815	-0.00178701		1815	-0.000112936		1815	0.000854979
					1816	-0.000519626		1816	-0.000574159		1816	-6.28744e-05		1816	-1.13164e-05		1816	-0.000304751		1816	-0.00102212
					1817	0.000982334		1817	0.000655944		1817	0.00055474		1817	-6.09761e-06		1817	-0.000528247		1817	-0.00118781
					1818	0.00130512		1818	-7.35646e-05		1818	0.00124091		1818	-8.38e-07		1818	-0.000163427		1818	-0.00154204
					1819	0.00094879		1819	-7.41755e-05		1819	0.00041555		1819	4.43938e-06		1819	0.00122971		1819	-0.000334802
					1820	0.00107338		1820	-7.43437e-05		1820	0.00015854		1820	-0.00162158		1820	0.00152115		1820	7.39479e-05
					1821	0.000828944		1821	-7.4079e-05		1821	0.000409779		1821	-0.000397447		1821	0.00226091		1821	0.000814236
					1822	0.000885529		1822	-7.33929e-05		1822	0.00051916		1822	0.00123777		1822	0.00279897		1822	0.000976095
					1823	0.000553186		1823	0.00107688		1823	0.000576576		1823	0.0021441		1823	0.00190534		1823	0.000729555
					1824	0.000871965		1824	0.000377321		1824	0.000941915		1824	0.00174157		1824	0.00134002		1824	0.000874647
					1825	-3.80825e-05		1825	3.93436e-05		1825	0.000275066		1825	0.00140021		1825	0.001493		1825	0.0013514
					1826	-0.0013769		1826	-3.70308e-05		1826	-0.00136408		1826	0.000750049		1826	0.000664292		1826	0.000939855
					1827	-0.00181445		1827	-0.000191777		1827	-0.00166565		1827	-0.00151889		1827	0.000583886		1827	0.000620034
					1828	-0.00188066		1828	0.00123513		1828	-0.00161976		1828	-0.00211656		1828	-1.82127e-05		1828	0.000671972
					1829	-0.000965479		1829	0.000833719		1829	-0.00104651		1829	-0.00191295		1829	-0.001202		1829	-7.42999e-05
					1830	0.000361141		1830	-0.00038599		1830	-0.000686033		1830	-0.000798022		1830	-0.00172749		1830	-0.000438748
					1831	0.00106926		1831	-0.00084397		1831	0.000891549		1831	-0.00162174		1831	-0.00165466		1831	-0.00129134
					1832	0.000368932		1832	-0.000780195		1832	0.00162611		1832	-0.00122409		1832	-0.000693518		1832	-0.00150205
					1833	0.000560218		1833	-0.00043464		1833	0.00237754		1833	-0.00202502		1833	0.000175937		1833	-0.00175083
					1834	-0.000426826		1834	-7.28147e-06		1834	0.0031257		1834	-0.00148451		1834	0.000353709		1834	-0.00125766
					1835	-0.000842139		1835	-0.000218093		1835	0.00278046		1835	-0.00181253		1835	0.000569803		1835	-0.000772505
					1836	0.000114339		1836	0.000252951		1836	0.0032617		1836	0.000110952		1836	-4.57803e-05		1836	-0.000255331
					1837	0.000762666		1837	0.000585874		1837	0.00128928		1837	0.00150597		1837	-0.00112304		1837	0.000443897
					1838	0.000362906		1838	-0.000739298		1838	0.00130308		1838	7.28516e-05		1838	-0.00111196		1838	6.52097e-05
					1839	0.00132512		1839	-0.00174254		1839	-0.000397048		1839	7.26994e-05		1839	0.000277454		1839	-0.000461358
					1840	0.00095937		1840	-0.00150383		1840	0.000228768		1840	0.00223057		1840	0.000605207		1840	-0.00103577
					1841	-0.000754278		1841	-0.000913134		1841	8.03882e-05		1841	0.00079206		1841	0.000691307		1841	-0.000587999
					1842	-0.00112576		1842	-0.000580436		1842	0.00127767		1842	0.000295247		1842	0.00164576		1842	-0.00135801
					1843	-0.00193501		1843	1.42915e-05		1843	0.000990486		1843	0.000290166		1843	0.00198857		1843	-0.00108576
					1844	-0.000349743		1844	0.000221074		1844	0.00040868		1844	0.00054685		1844	0.00143974		1844	-0.00163122
					1845	-0.00226656		1845	0.00134994		1845	-0.000207887		1845	0.00107533		1845	-1.07181e-05		1845	-0.00172436
					1846	-0.000848728		1846	0.000300905		1846	-0.00134936		1846	0.00137565		1846	0.000217201		1846	-0.00167513
					1847	0.000101608		1847	-0.000655998		1847	-0.00193589		1847	0.000547832		1847	-0.000906495		1847	-0.000693521
					1848	0.00112451		1848	-0.000980746		1848	-0.00248761		1848	-0.000608082		1848	-0.0016018		1848	-0.000379479
					1849	0.00170005		1849	-0.000503315		1849	-0.00102469		1849	-0.00102206		1849	-0.0028687		1849	0.000797027
					1850	0.0011483		1850	-0.000843678		1850	-0.000677274		1850	-0.000834068		1850	-0.0015872		1850	0.00115603
					1851	0.000749333		1851	-0.000641813		1851	0.000204486		1851	-0.000464069		1851	-0.00111728		1851	0.00107757
					1852	0.000813214		1852	-0.000517693		1852	0.00114043		1852	-0.000302029		1852	-0.000588935		1852	0.00103167
					1853	0.00122002		1853	-6.12934e-05		1853	0.000930415		1853	2.08894e-06		1853	0.000227845		1853	0.00175839
					1854	0.000909824		1854	-0.00051259		1854	0.000774268		1854	-0.00090168		1854	0.00105307		1854	0.00159774
					1855	0.0009527		1855	-0.000471558		1855	0.00160184		1855	-0.0013033		1855	0.00121675		1855	0.00066977
					1856	0.00118872		1856	0.000141828		1856	0.000792956		1856	-0.00133274		1856	0.000688894		1856	0.000174512
					1857	0.000277972		1857	0.000397592		1857	-0.000222535		1857	-0.000789949		1857	0.000449515		1857	-7.7996e-05
					1858	-0.000589479		1858	-0.00013424		1858	-0.0003148		1858	-0.000594904		1858	0.000128622		1858	-0.000537719
					1859	-0.000403553		1859	0.000986356		1859	-0.000414007		1859	0.000212437		1859	0.000506227		1859	-0.00102462
					1860	-0.00075417		1860	0.000879404		1860	-0.00214032		1860	0.00105211		1860	-0.000557658		1860	0.000381339
					1861	-0.000871253		1861	0.00127493		1861	-0.00274391		1861	-0.000151968		1861	-0.000493021		1861	0.00124019
					1862	-0.000708843		1862	0.00106723		1862	-0.000763688		1862	0.00236007		1862	-0.000608446		1862	0.00123937
					1863	-0.000417248		1863	0.00109048		1863	-0.000729143		1863	0.00253293		1863	-0.00202683		1863	0.000777799
					1864	-0.00102523		1864	0.00215307		1864	-0.00133467		1864	0.000745282		1864	-0.0191651		1864	-0.000153
					1865	-0.00335281		1865	0.00161502		1865	-0.000960242		1865	-0.00291282		1865	-0.0608633		1865	-0.003563
					1866	-0.00827001		1866	-0.00137367		1866	0.000724167		1866	-0.00756134		1866	-0.121201		1866	-0.00734217
					1867	-0.0136768		1867	-0.00536301		1867	0.00230858		1867	-0.0116002		1867	-0.191559		1867	-0.0109205
					1868	-0.0185833		1868	-0.00946297		1868	0.00612303		1868	-0.0136295		1868	-0.251067		1868	-0.0127379
					1869	-0.0211694		1869	-0.0150936		1869	0.0106575		1869	-0.013079		1869	-0.275704		1869	-0.0125244
					1870	-0.0207552		1870	-0.0157948		1870	0.0160021		1870	-0.0113388		1870	-0.262481		1870	-0.00972993
					1871	-0.0165207		1871	-0.0141366		1871	0.0184268		1871	-0.00949878		1871	-0.225117		1871	-0.0057645
					1872	-0.0110058		1872	-0.010549		1872	0.0181416		1872	-0.00741895		1872	-0.176044		1872	-0.00237808
					1873	-0.00647073		1873	-0.00623201		1873	0.0139266		1873	-0.00661926		1873	-0.13698		1873	0.000689381
					1874	-0.00380535		1874	-0.00256562		1874	0.00793169		1874	-0.00655968		1874	-0.116705		1874	0.000947888
					1875	-0.0012797		1875	-0.00103981		1875	-1.29973e-05		1875	-0.00584016		1875	-0.10801		1875	0.000697471
					1876	0.000826194		1876	0.000725422		1876	-0.00638747		1876	-0.00541068		1876	-0.102475		1876	-0.000271847
					1877	0.00153232		1877	0.00101008		1877	-0.00309269		1877	-0.0044412		1877	-0.0964891		1877	-0.00150004
					1878	0.00225867		1878	0.000794187		1878	-0.00456794		1878	-0.00364167		1878	-0.0883727		1878	-0.0020471
					1879	0.00346523		1879	0.00158774		1879	-0.0054783		1879	-0.00238208		1879	-0.0778558		1879	-0.00109299
					1880	0.00253797		1880	0.00248074		1880	-0.00861289		1880	-0.00163239		1880	-0.0661283		1880	-0.0011977
					1881	0.00267894		1881	0.00215321		1881	-0.00520603		1881	-0.00102257		1881	-0.0556603		1881	0.000438793
					1882	0.000956068		1882	0.00191516		1882	-0.00175885		1882	-0.00145258		1882	-0.0455217		1882	-0.000434473
					1883	0.000483358		1883	0.00211658		1883	-0.000821336		1883	-0.000542399		1883	-0.0370425		1883	-0.000419286
					1884	-6.91959e-05		1884	0.0019375		1884	-0.000663472		1884	-0.000841995		1884	-0.0309427		1884	0.00143566
					1885	-0.0010616		1885	0.00139792		1885	-0.000845243		1885	-0.00180134		1885	-0.0260422		1885	0.000357131
					1886	-0.00210388		1886	0.00105785		1886	-0.00157663		1886	-0.00151041		1886	-0.0225012		1886	-0.00137011
					1887	-0.00216603		1887	0.000517294		1887	-0.00265763		1887	-0.00140916		1887	-0.0207794		1887	-0.00252606
					1888	-0.00272806		1888	0.000746273		1888	-0.00262822		1888	-0.00242759		1888	-0.018877		1888	-0.000259298
					1889	-0.00325998		1889	0.000324793		1889	-0.00186839		1889	-0.000664561		1889	-0.0171739		1889	-0.002224
					1890	-0.00322181		1890	-0.000977137		1890	-0.00271813		1890	-0.000606396		1890	-0.0165801		1890	-0.000675971
					1891	-0.00303354		1891	-0.00119951		1891	-0.00362742		1891	-0.00238062		1891	-0.0165556		1891	-0.0010866
					1892	-0.0017252		1892	0.0002777		1892	-0.00393626		1892	-0.000627462		1892	-0.0166804		1892	-0.00193587
					1893	-0.000776778		1893	0.000334488		1893	-0.00412464		1893	-0.000103853		1893	-0.0171646		1893	-0.00173377
					1894	0.000271709		1894	0.000210871		1894	-0.00332254		1894	0.000500233		1894	-0.0176979		1894	1.41658e-05
					1895	8.02546e-05		1895	0.000606861		1895	-0.00308996		1895	0.000604815		1895	-0.0179606		1895	5.5549e-05
					1896	0.000508853		1896	0.000402469		1896	-0.00154689		1896	0.000539916		1896	-0.0194226		1896	-0.00195921
					1897	-0.000502504		1897	-0.000602293		1897	3.66797e-05		1897	-0.00107445		1897	-0.0196238		1897	-0.000361581
					1898	-0.00125382		1898	-0.00127741		1898	0.000370756		1898	-0.00115825		1898	-0.0201843		1898	-0.000532549
					1899	-0.00127511		1899	-0.00159288		1899	3.53459e-05		1899	-0.000431479		1899	-0.0200241		1899	-6.21138e-05
					1900	9.36372e-05		1900	-0.00151867		1900	0.00130046		1900	0.000215885		1900	-0.0204031		1900	0.000209728
					1901	0.000682402		1901	3.51481e-05		1901	0.00114609		1901	-0.000336142		1901	-0.0196214		1901	-0.00011702
					1902	-0.000405194		1902	2.40622e-05		1902	0.00125225		1902	0.000792458		1902	-0.0193091		1902	-0.000162358
					1903	-0.000294677		1903	-0.00156793		1903	0.00190895		1903	0.0013917		1903	-0.018716		1903	0.00153372
					1904	0.000808773		1904	-0.000754927		1904	0.00239618		1904	0.0010616		1904	-0.0191422		1904	0.000811203
					1905	-0.000502426		1905	-0.000492191		1905	0.00270396		1905	0.000642165		1905	-0.0183776		1905	0.0010001
					1906	-0.000273626		1906	-0.000759707		1906	0.00190228		1906	0.000773417		1906	-0.0171725		1906	0.00178041
					1907	-0.000644832		1907	-0.000127461		1907	0.00117114		1907	0.000585364		1907	-0.0171166		1907	0.00102213
					1908	-0.000676047		1908	-0.00050544		1908	0.00136055		1908	-3.19801e-05		1908	-0.01696		1908	-0.000884753
					1909	-0.000167275		1909	-0.000883628		1909	0.000110509		1909	-0.000458606		1909	-0.0166828		1909	0.000209768
					1910	0.000311483		1910	-0.000342011		1910	-0.000918986		1910	2.54982e-05		1910	-0.0177449		1910	0.000275685
					1911	-0.000199777		1911	0.00120943		1911	-0.000657933		1911	0.00115034		1911	-0.0177564		1911	0.00107299
					1912	-0.000441057		1912	0.0012007		1912	0.000323666		1912	0.00123593		1912	-0.0173073		1912	0.00238168
					1913	-6.23598e-05		1913	0.00091182		1913	-0.00017419		1913	0.00020288		1913	-0.0161676		1913	0.000169817
					1914	-7.36861e-05		1914	0.00121281		1914	0.0015285		1914	0.000194526		1914	-0.0149572		1914	0.00227319
					1915	-0.000905038		1915	0.00069368		1915	0.00137172		1915	0.00198727		1915	-0.0131863		1915	0.00227599
					1916	0.000430087		1916	-0.000375551		1916	0.000625484		1916	0.000905925		1916	-0.0128649		1916	0.000970133
					1917	-0.00123782		1917	0.000115131		1917	-0.000220222		1917	0.000425363		1917	-0.0123529		1917	0.000635619
					1918	-0.000259255		1918	0.000765745		1918	-0.0002254		1918	-0.000754414		1918	-0.0116703		1918	0.000112434
					1919	0.000819283		1919	0.000686306		1919	-0.00103005		1919	-0.000573401		1919	-0.0109573		1919	0.000980564
					1920	0.00234779		1920	0.00095683		1920	-0.000964193		1920	-0.000661595		1920	-0.0107939		1920	0.000699998
					1921	0.000440346		1921	0.00139734		1921	-0.00056782		1921	-0.000598994		1921	-0.0101799		1921	0.00103072
					1922	0.000432463		1922	0.00116784		1922	-0.000950944		1922	-0.0011656		1922	-0.00870557		1922	0.00072272
					1923	0.00170316		1923	0.000278361		1923	-0.000503571		1923	-0.0014414		1923	-0.00780082		1923	-1.40227e-05
					1924	0.00130156		1924	7.89147e-05		1924	-0.00041571		1924	-0.00040641		1924	-0.00748569		1924	-0.000689522
					1925	0.000269937		1925	0.00066952		1925	-0.00050737		1925	0.000259379		1925	-0.00584023		1925	-0.0010838
					1926	-2.17073e-05		1926	0.000790195		1926	0.000401441		1926	0.000725964		1926	-0.00395445		1926	-0.00127686
					1927	-0.000403372		1927	8.09585e-05		1927	0.000510712		1927	0.00169334		1927	-0.0037084		1927	-0.00105874
					1928	-8.50535e-05		1928	-0.000458172		1928	-0.000229567		1928	-1.92232e-05		1928	-0.00367208		1928	-0.00026944
					1929	0.000353249		1929	-6.71764e-05		1929	-0.00153941		1929	0.00116047		1929	-0.00258555		1929	0.000851004
					1930	0.00077154		1930	-0.000996037		1930	-0.000668819		1930	-0.000659793		1930	-0.00212884		1930	0.000832577
					1931	0.00107982		1931	-0.000994734		1931	-0.000137816		1931	-0.00114928		1931	-0.00231197		1931	0.000665257
					1932	0.0023081		1932	-6.32477e-05		1932	6.35886e-05		1932	-0.00155799		1932	-0.00247499		1932	-0.000390979
					1933	0.00164637		1933	0.00101844		1933	-0.000264618		1933	-9.14098e-05		1933	-0.00171793		1933	-0.000386156
					1934	0.000194646		1934	5.56554e-06		1934	0.000827551		1934	-0.00151312		1934	-0.00155082		1934	-0.0015203
					1935	-0.000827072		1935	4.44566e-06		1935	-0.00013992		1935	-0.000589554		1935	-0.00197372		1935	-0.00106343
					1936	-0.000998779		1936	0.000544922		1936	-0.00109705		1936	-0.000295247		1936	-0.00173665		1936	-0.000915571
					1937	-0.00141047		1937	-0.000312378		1937	-0.000343842		1937	-0.000420208		1937	-0.00144965		1937	-0.000116758
					1938	-0.00173214		1938	-0.000909375		1938	0.000389675		1938	-0.000194446		1938	-0.00125278		1938	-0.000327016
					1939	-0.00045378		1939	-3.35e-07		1939	-3.65123e-05		1939	-0.000767973		1939	-0.00136608		1939	5.36283e-05
					1940	0.00019461		1940	-1.54724e-06		1940	-0.000122421		1940	-0.000670799		1940	-0.00165957		1940	-0.000244856
					1941	0.00012304		1941	-0.00184833		1941	0.000151931		1941	-0.000582938		1941	-0.00136333		1941	-0.000402498
					1942	-0.000438486		1942	-0.0013039		1942	-5.3475e-05		1942	-0.000964402		1942	0.000122625		1942	-0.000769329
					1943	0.000770041		1943	0.00049094		1943	-0.000588659		1943	-0.0018752		1943	0.00032823		1943	-0.00171538
					1944	0.000608626		1944	0.000636214		1944	-0.00093364		1944	-0.00182536		1944	-2.656e-05		1944	-0.00182069
					1945	0.00105728		1945	0.00128194		1945	-0.000948439		1945	-0.00104488		1945	-1.79348e-06		1945	-0.000985277
					1946	0.000926003		1946	0.000668147		1946	-0.000993077		1946	-0.000963794		1946	-0.000477521		1946	-0.00029919
					1947	0.00042481		1947	0.000214852		1947	-0.00140758		1947	-0.000712104		1947	-0.0012638		1947	8.75405e-05
					1948	-0.000466294		1948	-0.00120792		1948	-0.00144196		1948	0.000360167		1948	-0.00202067		1948	-8.51206e-05
					1949	0.0011027		1949	-0.000740148		1949	-0.00139624		1949	0.001093		1949	-0.00230819		1949	-0.00148721
					1950	0.000921802		1950	-0.000601806		1950	-0.000170461		1950	0.00106638		1950	-0.00292642		1950	-0.000175271
					1951	0.00156102		1951	0.000217128		1951	-0.00056463		1951	0.00117028		1951	-0.00274542		1951	-0.000168785
					1952	0.00177036		1952	0.000466677		1952	-0.000908778		1952	0.00104469		1952	-0.00253523		1952	-0.00211043
					1953	0.00114984		1953	0.000516867		1953	-0.000732928		1953	0.000149581		1953	-0.00197592		1953	-0.00010062
					1954	-0.000970539		1954	-0.000622279		1954	-0.000697107		1954	-0.00118507		1954	-0.00138755		1954	0.00169957
					1955	-0.000350762		1955	-0.000900738		1955	-0.00248134		1955	-0.00015078		1955	-2.01769e-05		1955	0.00163009
					1956	-0.000810819		1956	-0.000798483		1956	-0.00203566		1956	-0.000143383		1956	3.61389e-05		1956	0.000740902
					1957	6.92991e-05		1957	-0.00114549		1957	-0.00232008		1957	-0.00106647		1957	-0.000458666		1957	0.000241963
					1958	0.000649605		1958	-1.38523e-05		1958	-0.00229465		1958	0.000310499		1958	-0.000704655		1958	-0.000646772
					1959	-0.000529891		1959	-0.000237195		1959	-0.00186938		1959	-0.000117165		1959	-0.000661892		1959	-0.000575347
					1960	-0.00184918		1960	-0.00052184		1960	-0.000434307		1960	-0.000107219		1960	-0.000400443		1960	0.000426191
					1961	-8.03666e-05		1961	-0.000575647		1961	-0.000619459		1961	-9.67421e-05		1961	-0.000590375		1961	0.0010478
					1962	-7.97375e-05		1962	-0.000358589		1962	-0.000984869		1962	0.00116152		1962	-0.000931754		1962	0.00196942
					1963	-7.83825e-05		1963	0.000659359		1963	-0.000720565		1963	0.000429921		1963	-0.000574651		1963	0.00209102
					1964	-7.63355e-05		1964	0.000638223		1964	2.34188e-05		1964	-3.14695e-05		1964	-0.000709134		1964	0.00180254
					1965	-0.00221202		1965	0.000918031		1965	1.70512e-05		1965	-1.26867e-05		1965	-0.00145527		1965	0.00148393
					1966	-0.00125979		1966	0.00113881		1966	0.000620299		1966	0.00104624		1966	-0.00196314		1966	0.00114514
					1967	-0.00152725		1967	0.000940581		1967	0.00205313		1967	0.00115528		1967	-0.00127282		1967	-0.000773877
					1968	-0.000884404		1968	0.000123379		1968	0.00218551		1968	0.000744395		1968	-0.000134364		1968	-1.3174e-05
					1969	-0.000671227		1969	-0.000482773		1969	0.0017274		1969	0.000673559		1969	0.000422136		1969	-0.000362806
					1970	-0.000137707		1970	0.000322153		1970	0.00176877		1970	0.000242738		1970	0.00111661		1970	-0.000712827
					1971	0.000356171		1971	0.000198186		1971	0.000999581		1971	-0.000718105		1971	0.00198898		1971	-0.000733291
					1972	0.000910421		1972	0.000115353		1972	0.000319799		1972	-0.000589003		1972	0.00235916		1972	-0.000404254
					1973	0.000915059		1973	5.36812e-05		1973	0.000769386		1973	0.000240008		1973	0.00172708		1973	-0.00174577
					1974	0.000980101		1974	-0.0002168		1974	0.000488304		1974	-0.000391109		1974	0.00169266		1974	9.28583e-05
					1975	8.55618e-05		1975	-0.00101606		1975	0.000366515		1975	-0.00107239		1975	0.00170581		1975	0.000104178
					1976	-0.000608541		1976	-0.000574075		1976	0.00066398		1976	-0.00101388		1976	0.00236646		1976	0.000115016
					1977	-0.000822191		1977	0.000219188		1977	0.00105066		1977	-0.0007156		1977	0.00164452		1977	-0.00196855
					1978	-0.00126537		1978	-0.000116243		1978	6.65154e-05		1978	-0.000447606		1978	0.0018399		1978	-0.00126372
					1979	-0.000888066		1979	-0.000720338		1979	0.000461505		1979	-0.000129933		1979	0.00269251		1979	0.000140202
					1980	0.000109744		1980	-0.00103307		1980	0.000415588		1980	0.00062738		1980	0.00275228		1980	0.00136315
					1981	0.00135808		1981	-0.0011744		1981	0.00128872		1981	0.000194289		1981	0.00237912		1981	0.00105506
					1982	0.00150695		1982	-0.00139431		1982	0.000790865		1982	0.000410753		1982	0.00292292		1982	0.000865878
					1983	3.65523e-05		1983	-0.000272769		1983	0.000471975		1983	-6.32712e-05		1983	0.00183362		1983	0.000525529
					1984	0.00118638		1984	0.000250261		1984	0.000272007		1984	0.000582173		1984	-0.000428898		1984	0.00018395
					1985	0.000716987		1985	0.00111481		1985	0.000220918		1985	0.000407041		1985	-0.000444711		1985	-0.000848924
					1986	-0.000501796		1986	0.0012209		1986	-0.000431338		1986	0.00103129		1986	-0.000563916		1986	0.00013684
					1987	-7.99438e-05		1987	0.00172858		1987	0.000765196		1987	-2.51333e-05		1987	-0.000956608		1987	0.000921174
					1988	-0.000157438		1988	0.00199786		1988	0.00132047		1988	0.000167732		1988	-0.00137288		1988	0.00160401
					1989	0.000155743		1989	1.48927e-05		1989	0.00206444		1989	-0.000540164		1989	-0.000612835		1989	0.00202528
					1990	-9.03819e-05		1990	0.00084138		1990	0.00147707		1990	-0.000498869		1990	-0.00166656		1990	0.0020249
					1991	0.000224209		1991	0.000445683		1991	0.00118829		1991	-0.000908433		1991	-0.00156417		1991	0.00222282
					1992	-0.000290464		1992	-0.000208278		1992	-0.000521934		1992	-0.000438904		1992	-0.00164574		1992	0.00207896
					1993	5.62003e-06		1993	-0.000370468		1993	-0.000153653		1993	-0.000880334		1993	-0.0012314		1993	0.00170324
					1994	0.000772484		1994	-0.000740857		1994	-0.00100692		1994	-0.000622772		1994	-0.00197123		1994	0.000925599
					1995	0.000550148		1995	-0.00060941		1995	-0.000791776		1995	0.000103729		1995	-0.00170534		1995	0.000615953
					1996	0.000618636		1996	-0.000326095		1996	-0.00111828		1996	0.000989117		1996	-0.00204383		1996	-7.57712e-05
					1997	0.000927969		1997	4.91214e-05		1997	1.3519e-05		1997	0.00133334		1997	-0.00191682		1997	-0.000369648
					1998	0.00022817		1998	0.000656273		1998	0.00045357		1998	0.00138634		1998	-0.000354394		1998	-0.000665756
					1999	-0.000850738		1999	1.09199e-05		1999	0.000901819		1999	0.00141807		1999	0.000713325		1999	-0.000424171
					2000	-0.00116873		2000	9.17663e-06		2000	0.00152822		2000	0.00078846		2000	0.00110623		2000	0.000585028
[truncated: 1,062 more rows]

## Sheet: Supplementary Fig 2
NCOMMS-18-35326-T
Supplementary Figures 2a-c			Structural
Supplementary Figure 2d
Molar drug	WT			K22A			F66A			F97A			R100A			F66A/F97A/R100A
1.25e-05	91.3473	7.57767	2	83.18	14.3974	3	102.664	4.91938	2	92.5556	2.85576	3	98.9062	7.19413	3	53.7804	3.38105	4
6.25e-06	82.2623	10.1534	3	89.7025	11.5308	3	85.8397	0.903092	3	90.2915	7.27521	3	96.038	19.722	3	25.0592	1.75418	4
3.13e-06	95.4408	2.12102	3	88.6469	7.96317	3	88.813	8.41884	3	92.7545	5.50405	2	100.807	8.21165	3	13.0606	2.69864	4
1.56e-06	90.5971	1.87558	2	102.423	5.64983	3	91.163	8.60779	3	92.3265	8.81572	3	89.846	7.07621	3	9.12356	1.65425	4
7.81e-07	87.3148	13.2523	3	89.9229	9.41767	2	92.0881	1.11481	3	95.3562	6.6232	3	101.026	17.6735	3	7.26474	10.189	3
3.91e-07	92.7858	10.8044	3	102.663	10.4279	3	89.1734	10.8225	3	71.5304	3.90893	3	92.4732	11.0626	3	3.49452	6.89614	4
1.95e-07	96.6474	13.1967	3	94.2121	15.3932	3	82.5491	11.1732	3	78.2769	11.8845	3	95.4757	11.1535	3	3.49452	6.89614	4
9.77e-08	94.2951	11.7322	3	86.9907	0.913446	3	93.8935	15.9701	3	81.78	16.1612	3	100.376	8.43049	3	1.73356	13.9276	4
4.88e-08	74.2758	15.5101	3	94.4829	6.83321	3	90.7698	9.21987	3	82.2437	19.5095	3	81.8418	8.79562	3	3.39008	13.5103	3
2.44e-08	83.1894	15.6666	3	89.6214	1.38865	3	80.3792	7.98115	3	76.4453	4.34507	3	83.8975	10.5175	3	1.40385	2.07024	3
1.22e-08	65.123	2.29443	2	66.2275	0.109855	2	66.3507	14.1042	3	54.7555	6.59575	3	56.0308	10.9221	3	0.380799	4.41549	4
6.1e-09	21.8213	6.07683	2	44.758	7.65662	3	48.3433	5.97069	3	54.0666	10.1254	3	61.7342	3.59263	2	0.368918	2.9577	4
3.05e-09	8.3656	17.3562	3	25.8432	2.20383	3	25.2261	5.03089	3	29.7675	0.86034	2	33.9456	7.487	3	0.332413	2.86592	4
1.53e-09	0	3.53392	3	0	9.99802	3	0	5.43636	3	0	14.6771	2	0	13.6604	3	0.931016	8.78703	4
Supplementary Figure 2e		NMR CHEMICAL SHIFTS							Supplementary Figure 2f
									RRM1	#	free	01:04:00	ratio	Delta
									-	ASN	8.513	119.285	8.513	119.285	0
Supplementary Figure 2g		Synthesis of Ro-OH							-	SER	8.223	116.642	8.24	116.683	0.02
									-	ASN	8.175	120.67	8.171	120.755	0.02
Supplementary Figure 2h									21	MET	8.236	118.691	8.271	118.916	0.06
uM Ro	Ro 08-2750		RoOH		Ro#06				22	LYS	7.73	121.76	7.73	121.76	0
100	15.33	10	12	13.33	251.33	228.67			23	MET	9.265	122.611	9.288	122.646	0.02
50	23.33	16.67	84.67	76.67	232.67	253.33			24	PHE	8.651	125.014	8.651	124.839	0.03
25	16	26.67	140	105.33	228.67	262			25	ILE	8.079	126.622	7.965	126.622	0.11
12.5	21.33	23.33	168.67	193.33	250	237.33			26	GLY	7.402	112.188	7.306	112.107	0.1
6.25	62.67	-	226	-	249.33	-			27	GLY	8.429	107.248	8.418	107.248	0.01
3.125	113.33	72.67	214	232.67	246	234			28	LEU	7.281	113.927	7.254	113.927	0.03
1.562	167.33	131.33	284.67	266	260.67	265.33			29	SER	9.002	115.622	9.002	115.622	0
0.781	204.67	162.67	242.67	222	242	212.67			30	TRP	8.369	128.913	8.338	128.808	0.04
0.391	191.33	209.33	244	255.33	232	247.33			31	GLN	7.5	116.376	7.482	116.335	0.02
0.195	248.67	218.67	228	293.33	232.67	270.67			32	THR	7.169	118.957	7.169	118.957	0
0.098	220.67	225.33	244	236.67	222	246			33
0.049	247.33	256	224	274.67	239.33	248.67			34
0.024	249.33	256	252	235.33	248.67	250			35	ASP	7.622	115.618	7.622	115.618	0
0.012	243.33	270.67	234.67	310.67	233.33	262			36	SER	7.82	117.919	7.82	117.919	0
0.006	254	256	246.67	228	243.33	250			37	LEU	7.89	123.132	7.89	123.132	0
0.003	200	198.67	214.67	216.67	233.33	218			38	ARG	8.188	120.495	8.188	120.495	0
									39	ASP	8.258	119.892	8.258	119.892	0
									40	TYR	7.546	118.383	7.532	118.322	0.02
Supplementary Figure 2i-l		Structural							41	PHE	8.279	113.471	8.279	113.471	0
									42	SER	8.561	117.41	8.561	117.41	0
									43	LYS	6.869	119.857	6.869	119.857	0
									44	PHE	7.808	116.304	7.808	116.304	0
									45	GLY	7.176	106.423	7.176	106.423	0
									46	GLU	7.89	116.828	7.89	116.828	0
									47	ILE	8.858	128.183	8.858	128.253	0.01
									48	ARG	8.725	125.995	8.732	125.925	0.02
									49	GLU	7.296	116.511	7.296	116.511	0
									50	CYS	8.668	123.002	8.676	123.053	0.01
									51	MET	8.56	123.078	8.582	123.01	0.03
									52
									53
									54	ARG	8.383	121.255	8.389	121.322	0.01
									55	ASP	8.425	125.236	8.448	125.236	0.02
									56	0
									57	THR	8.172	113.716	8.172	113.716	0
									58	THR	8.063	111.094	8.084	111.094	0.02
									59
									60	ARG	7.675	119.881	7.671	119.757	0.03
									61	SER	8.791	116.875	8.791	116.688	0.04
									62	ARG	8.917	124.498	8.898	124.498	0.02
									63	GLY	9.07	107.329	9.059	107.226	0.02
									64
									65	GLY	7.877	106.02	7.804	105.889	0.08
									66	PHE	8.379	114.158	8.366	114.097	0.02
									67	VAL	8.261	119.65	8.251	119.786	0.03
									68	THR	8.567	122.111	8.577	122.195	0.02
									69	PHE	8.753	127.453	8.764	127.453	0.01
									70	ALA	7.811	118.999	7.807	118.931	0.01
									71	ASP	8.22	118.142	8.207	118.163	0.01
									72
									73	ALA	8.633	121.573	8.641	121.573	0.01
									74	SER	7.733	114.483	7.733	114.483	0
									75	VAL	6.645	120.454	6.645	120.454	0
									76	ASP	6.71	117.075	6.719	117.075	0.01
									77	LYS	7.247	119.506	7.247	119.506	0
									78	VAL	7.401	120.127	7.409	120.092	0.01
									79	LEU	7.89	116.338	7.899	116.379	0.01
									80	GLY	7.516	105.294	7.52	105.257	0.01
									81	GLN	7.171	123.457	7.171	123.457	0
									82
									83	HIS	7.415	114.709	7.415	114.709	0
									84	HIS	8.88	125.938	8.88	125.938	0
									85	GLU	7.862	121.515	7.851	121.41	0.02
									86	LEU	8.368	122.716	8.358	122.716	0.01
									87	ASP	9.427	128.245	9.427	128.245	0
									88	SER	8.497	105.174	8.497	105.174	0
									89	LYS	7.236	120.759	7.236	120.759	0
									90	THR	8.424	121.118	8.424	121.237	0.02
									91	ILE	7.767	121.908	7.755	121.838	0.02
									92	ASP	8.18	117.405	8.154	117.446	0.03
									93
									94	LYS	9.284	121.585	9.284	121.585	0
									95	VAL	8.562	120.333	8.631	120.894	0.13
									96	ALA	8.062	127.624	8.116	127.975	0.09
									97	PHE	8.042	120.508	8.003	120.61	0.04
									98
									99
									100	ARG	8.211	123.067	8.229	123.118	0.02
									101	ALA	8.242	126.011	8.246	126.011	0
									102	GLN	8.235	121.21	8.235	121.21	0

## Sheet: Supplementary Fig 3
NCOMMS-18-35326-T
Supplementary Figure 3a		NMR spectra

## Sheet: Supplementary Fig 4
NCOMMS-18-35326-T
Supplementary Figure 4a-d		Structural

[truncated: 4 more sheets: Supplementary Fig 5, Supplementary Fig 6, Supplementary Fig 7, Supplementary Fig 8]
